# Supplementary material
Source: PubMed Central journal article supplement (PMC10405300)
Supplement: NIHMS1884429-supplement-supp_1.pdf [file NIHMS1884429-supplement-supp_1.pdf]

Electronic Supporting Information

For

**Synthesis of Enantioenriched 2-Alkyl Piperidine Derivatives through  
Asymmetric Reduction of Pyridinium Salts**

Bo Qu,\* Hari P. R. Mangunuru, Xudong Wei, Keith R. Fandrick, Jean-Nicolas Desrosiers, Joshua D. Sieber, Dmitry Kurouski, Nizar Haddad, Lalith P. Samankumara, Heewon Lee, Jolaine Savoie, Shengli Ma, Nelu Grinberg, Max Sarvestani, Nathan K. Yee, Jinhua J. Song and Chris H. Senanayake

*Chemical Development, Boehringer Ingelheim Pharmaceuticals, Inc. 900 Ridgebury Road,  
Ridgefield, CT 06877 USA*

**Table of Contents**

|                                                                                          |      |
|------------------------------------------------------------------------------------------|------|
| 1. General information                                                                   | S3   |
| 2. General procedure for synthesis of ligands                                            | S4   |
| 3. General procedure for synthesis of pyridinium salts                                   | S13  |
| 4. General procedure for asymmetric hydrogenation of pyridinium salts                    | S19  |
| 5. Chiral enrichment and cyclization                                                     | S25  |
| 6. Crystal data and structure refinement for complex <b>3</b> and ( <i>R</i> )- <b>7</b> | S31  |
| 7. NMR spectra                                                                           | S33  |
| 8. Chiral HPLC spectra                                                                   | S127 |
| 9. Differential Scanning Calorimetry (DSC) plots                                         | S145 |
| 10. Transition state calculations                                                        | S147 |

## I. General Information

All reactions for the preparation of substrates and catalysts were performed in standard, dry glassware under an inert atmosphere of nitrogen or argon unless otherwise described. All starting materials and reagents were purchased from commercial sources and used as received unless otherwise noted.  $^1\text{H}$  and  $^{13}\text{C}$  NMR spectra were recorded using 400 or 500 MHz spectrometers. Chemical shifts ( $\delta$ ) are given in ppm, and coupling constants ( $J$ ) are given in Hz. The 7.26 resonance of residual  $\text{CHCl}_3$  (or 0 ppm of TMS) for proton spectra and the 77.23 ppm resonance of  $\text{CDCl}_3$  for carbon spectra were used as internal references. Flash chromatography was performed on a Combi-Flash automated system with silica columns. High resolution mass spectrometric data were obtained on an Agilent 6210 time-of-flight HPLC/MS spectrometer (ESI-TOF).

**General procedure for the synthesis of ligands:**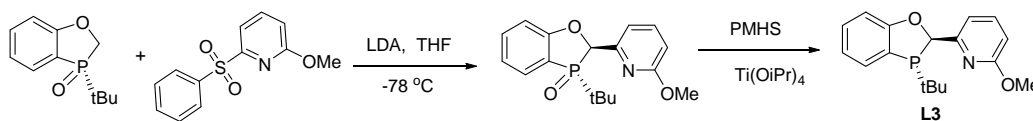

A 250 mL 3-neck round bottom flask equipped with a magnetic stir bar was charged with 3-(tert-butyl)-2H-benzo[d][1,3]oxaphosphole 3-oxide (2.0 g, 9.514 mmol), 2-methoxy-6-(phenylsulfonyl)pyridine (2.38 g, 9.514 mmol) and THF (20 mL). The mixture was cooled down to  $-78\text{ }^{\circ}\text{C}$  with a dry ice/acetone bath. LDA (14.27 mL, 2 M in THF/ethyl benzene, 28.54 mmol) was added slowly and the internal temperature was kept under  $-60\text{ }^{\circ}\text{C}$ . After 2 h, a sample was taken and completed conversion was indicated from LC-MS. The mixture was quenched with methanol (5 mL) and sat  $\text{Na}_2\text{CO}_3$  solution (10 mL) was added; the mixture was further warmed to  $50\text{ }^{\circ}\text{C}$  and stir for 2 h for epimerization to the *trans*-diastereomer. The crude mixture was concentrated under reduced pressure, worked up with DCM (50 mLx2) and dried over  $\text{Na}_2\text{SO}_4$  and purified using column chromatography with 80% EtOAc/hexanes to get the desired (2R,3S)-3-(tert-butyl)-2-(6-methoxypyridin-2-yl)-2H-benzo[d][1,3]oxaphosphole 3-oxide as a white solid, 2.45 g (7.72 mmol), 81% yield; mp  $158.0\text{--}160.0\text{ }^{\circ}\text{C}$ ;  $[\alpha]_{\text{D}}^{20} = +208.8$  (c 1.0, EtOH);  $^1\text{H}$  NMR (500 MHz,  $\text{CDCl}_3$ ):  $\delta$  7.58 (m, 3H), 7.04 (m, 3H), 6.63 (m, 1H), 5.60 (s, 1H), 3.88 (s, 3H), 1.37 (d,  $J = 7.8$  Hz, 9H);  $^{13}\text{C}$  NMR (125 MHz,  $\text{CDCl}_3$ ):  $\delta$  163.9 (d,  $J_{\text{C-P}} = 17.5$  Hz), 163.5 (d,  $J_{\text{C-P}} = 1.7$  Hz), 151.6 (d,  $J_{\text{C-P}} = 4.5$  Hz), 139.2 (d,  $J_{\text{C-P}} = 2.0$  Hz), 135.0 (d,  $J_{\text{C-P}} = 1.8$  Hz), 129.9 (d,  $J_{\text{C-P}} = 6.1$  Hz), 122.3 (d,  $J_{\text{C-P}} = 8.8$  Hz), 113.5 (d,  $J_{\text{C-P}} = 90.0$  Hz), 113.6 (d,  $J_{\text{C-P}} = 5.6$  Hz), 113.4 (d,  $J_{\text{C-P}} = 3.3$  Hz), 110.1 (d,  $J_{\text{C-P}} = 2.3$  Hz), 77.4, 53.3, 34.6 (d,  $J_{\text{C-P}} = 70.5$  Hz), 24.2;  $^{31}\text{P}$  NMR (202 MHz,  $\text{CDCl}_3$ ):  $\delta$  60.1; HRMS (ESI)  $[\text{M}+\text{H}]^+$   $m/z$  calcd for  $[\text{C}_{17}\text{H}_{21}\text{NO}_3\text{P}]^+$  318.1254, found 318.1248.

An oven dried 100 mL Schlenk flask equipped with a magnetic stir bar was charged with phosphine oxide (500 mg, 1.331 mmol) and THF (10 mL) and the solution was thoroughly degassed by vacuum *purge-and-refill* with argon. The mixture was then added polymethylhydrosiloxane (1.50 g). To this solution at rt added titanium tetraisopropoxide (756 mg, 2.66 mmol). Reaction mixture was stirred at 60 °C for 14 h under argon atmosphere. The reaction was quenched with degassed 30% aqueous NaOH (10 mL) over 10 min. The resulting mixture was stirred at 60 °C for 1 h. Then the mixture was cooled to room temperature and the layers were separated under argon. The aqueous layer was further washed twice with degassed MTBE. The combined organic layers was dried over MgSO<sub>4</sub>, loaded on to a short plug of basic alumina, and eluted with MTBE. The free phosphine 2-((2R,3R)-3-(tert-butyl)-2,3-dihydrobenzo[d][1,3]oxaphosphol-2-yl)-6-methoxypyridine **L3** was obtained as a white solid after dryness, 250 mg (0.83 mmol), 62% yield. <sup>1</sup>H NMR (500 MHz, CDCl<sub>3</sub>): δ 7.43 (m, 2H), 7.33 (m, 1H), 7.06 (m, 1H), 6.96 (m, 1H), 6.77 (m, 1H), 6.54 (m, 1H), 5.91 (s, 1H), 3.8 (s, 3H), 1.08 (d, *J* = 7.8 Hz, 9H); <sup>13</sup>C NMR (125 MHz, CDCl<sub>3</sub>): δ 164.0, 163.8 (d, *J*<sub>C-P</sub> = 1.8 Hz), 158.7 (d, *J*<sub>C-P</sub> = 14.3 Hz), 139.2 (d, *J*<sub>C-P</sub> = 1.2 Hz), 131.6 (d, *J*<sub>C-P</sub> = 20.0 Hz), 131.2, 125.7, 122.2 (d, *J*<sub>C-P</sub> = 17.0 Hz), 121.4 (d, *J*<sub>C-P</sub> = 6.2 Hz), 111.4 (d, *J*<sub>C-P</sub> = 6.1 Hz), 111.0 (d, *J*<sub>C-P</sub> = 0.5 Hz), 109.1 (d, *J*<sub>C-P</sub> = 2.5 Hz), 85.1 (d, *J*<sub>C-P</sub> = 27.5 Hz), 53.3, 31.0 (d, *J*<sub>C-P</sub> = 21.7 Hz), 26.6 (d, *J*<sub>C-P</sub> = 14.6 Hz); <sup>31</sup>P NMR (202 MHz, CDCl<sub>3</sub>): δ 17.6; HRMS (ESI) [M+H]<sup>+</sup> *m/z* calcd for [C<sub>17</sub>H<sub>21</sub>NO<sub>2</sub>P]<sup>+</sup> 302.1304, found 302.1295.

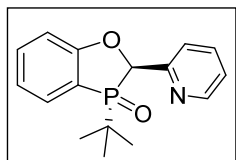

**(2R,3S)-3-(tert-butyl)-2-(pyridin-2-yl)-2H-benzo[d][1,3] oxaphosphole 3-**

**oxide:** white solid, 2.077 g (7.23 mmol), 76% yield; mp 164.0-166.0 °C; [α]<sub>D</sub><sup>20</sup> = + 87.4 (c 0.05, EtOH); <sup>1</sup>H NMR (500 MHz, CDCl<sub>3</sub>): δ 8.61 (d, *J* =

5.0 Hz, 1H), 7.67 (qd, *J* = 7.0, 1.4 Hz, 2H), 7.55 (t, *J* = 7.8 Hz, 1H), 7.38 (d, *J* = 7.8 Hz, 1H), 7.21

(m, 1H), 7.12 (m, 2H), 5.74 (d,  $J = 1.8$  Hz, 1H), 1.37 (d,  $J = 5.0$  Hz, 9H);  $^{13}\text{C}$  NMR (125 MHz,  $\text{CDCl}_3$ ):  $\delta$  163.9 (d,  $J_{\text{C-P}} = 17.5$  Hz), 154.3 (d,  $J_{\text{C-P}} = 4.0$  Hz), 149.3 (d,  $J_{\text{C-P}} = 1.5$  Hz), 136.7 (d,  $J_{\text{C-P}} = 1.8$  Hz), 135.1 (d,  $J_{\text{C-P}} = 1.9$  Hz), 130.0 (d,  $J_{\text{C-P}} = 6.1$  Hz), 122.9 (d,  $J_{\text{C-P}} = 2.0$  Hz), 122.5 (d,  $J_{\text{C-P}} = 9.0$  Hz), 121.4 (d,  $J_{\text{C-P}} = 2.6$  Hz), 113.8 (d,  $J_{\text{C-P}} = 90.9$  Hz), 113.7 (d,  $J_{\text{C-P}} = 5.6$  Hz), 77.7 (d,  $J_{\text{C-P}} = 53.9$  Hz), 33.9 (d,  $J_{\text{C-P}} = 71.7$  Hz), 24.1;  $^{31}\text{P}$  NMR (202 MHz,  $\text{CDCl}_3$ ):  $\delta$  60.5; HRMS (ESI)  $[\text{M}+\text{H}]^+$   $m/z$  calcd for  $[\text{C}_{16}\text{H}_{19}\text{NO}_2\text{P}]^+$  is 288.1075, found 288.1148.

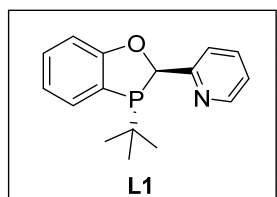

**2-((2R,3R)-3-(tert-butyl)-2,3-dihydrobenzo[d][1,3]oxaphosphol-2-**

**yl)pyridine, L1:** white solid, 282 mg (1.04 mmol), 78% yield.  $^1\text{H}$  NMR

(400 MHz,  $\text{CDCl}_3$ ):  $\delta$  8.60 (d,  $J = 4.80$  Hz, 1H), 7.59 (td,  $J = 7.6, 1.5$  Hz,

1H), 7.44 (ddd,  $J = 7.5, 3.6, 1.4$  Hz, 1H), 7.36 (td,  $J = 7.8$  Hz, 1.5 Hz, 1H), 7.21 (d,  $J = 8.0$  Hz,

1H), 7.11 (m, 2H), 7.00 (tdd,  $J = 7.4, 2.4, 1.0$  Hz, 1H), 6.05 (s, 1H), 1.10 (d,  $J = 12.5$  Hz, 9H);

$^{13}\text{C}$  NMR (100 MHz,  $\text{CDCl}_3$ ):  $\delta$  163.6, 161.1 (d,  $J_{\text{C-P}} = 14.7$  Hz), 149.4, 136.8, 131.7 (d,  $J_{\text{C-P}} =$

20.0 Hz), 131.3, 121.9 (d,  $J_{\text{C-P}} = 2.4$  Hz), 121.8 (d,  $J_{\text{C-P}} = 17.2$  Hz), 121.5 (d,  $J_{\text{C-P}} = 6.2$  Hz),

119.3 (d,  $J_{\text{C-P}} = 3.2$  Hz), 110.9, 85.2 (d,  $J_{\text{C-P}} = 29.1$  Hz), 31.1 (d,  $J_{\text{C-P}} = 20.2$  Hz), 26.5 (d,  $J_{\text{C-P}} =$

14.5 Hz);  $^{31}\text{P}$  NMR (162 MHz,  $\text{CDCl}_3$ ):  $\delta$  60.5; HRMS (ESI)  $[\text{M}+\text{H}]^+$   $m/z$  calcd for

$[\text{C}_{16}\text{H}_{19}\text{NOP}]^+$  is 272.1199, found 272.1204.

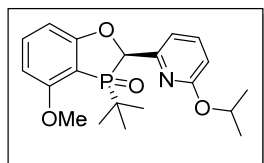

**(2R,3S)-3-(tert-butyl)-2-(6-isopropoxy-2-yl)-4-methoxy-2H-**

**benzo[d][1,3] oxaphosphole 3-oxide:** white solid, 2.32 g (6.18 mmol),

65% yield; mp 102.0-104.0  $^\circ\text{C}$ ;  $[\alpha]_{\text{D}}^{20} = +153.0$  (c 1.0, EtOH);  $^1\text{H}$  NMR

(500 MHz,  $\text{CDCl}_3$ ):  $\delta$  7.52 (t,  $J = 7.9$  Hz, 1H), 7.43 (t,  $J = 8.2$  Hz, 1H), 6.92 (dd,  $J = 7.4, 1.2$  Hz,

1H), 6.68 (dd,  $J = 8.2, 3.0$  Hz, 1H), 6.57 (d,  $J = 8.2$  Hz, 1H), 6.51 (dd,  $J = 8.2, 4.1$  Hz, 1H), 5.51

(d,  $J = 2.1$  Hz, 1H), 5.24 (Septet,  $J = 6.2$  Hz, 1H), 3.86 (s, 3H), 1.39 (d,  $J = 16.5$  Hz, 9H), 1.34 (d,

$J = 6.2$  Hz, 3H), 1.32 (d,  $J = 6.2$  Hz, 3H);  $^{13}\text{C}$  NMR (125 MHz,  $\text{CDCl}_3$ ):  $\delta$  165.6 (d,  $J_{\text{C-P}} = 15.4$

Hz), 162.8 (d,  $J_{C-P}$  = 1.6 Hz), 161.7 (d,  $J_{C-P}$  = 1.8 Hz), 151.6 (d,  $J_{C-P}$  = 4.4 Hz), 139.1 (d,  $J_{C-P}$  = 1.9 Hz), 136.5 (d,  $J_{C-P}$  = 1.1 Hz), 113.6 (d,  $J_{C-P}$  = 3.0 Hz), 110.6 (d,  $J_{C-P}$  = 2.2 Hz), 106.0 (d,  $J_{C-P}$  = 5.4 Hz), 103.5 (d,  $J_{C-P}$  = 5.6 Hz), 102.0 (d,  $J_{C-P}$  = 89.4 Hz), 78.4 (d,  $J_{C-P}$  = 54.5 Hz), 68.1, 55.6, 34.3 (d,  $J_{C-P}$  = 73.8 Hz), 25.0 (d,  $J_{C-P}$  = 0.9 Hz), 22.05, 22.01;  $^{31}\text{P}$  NMR (202 MHz,  $\text{CDCl}_3$ ):  $\delta$  60.5; HRMS (ESI)  $[\text{M}+\text{H}]^+$   $m/z$  calcd for  $[\text{C}_{20}\text{H}_{27}\text{NO}_4\text{P}]^+$  is 376.1599, found 376.1674.

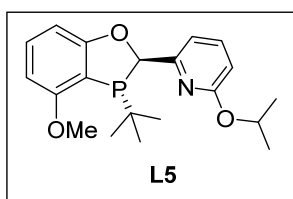

**2-((2R,3R)-3-(tert-butyl)-4-methoxy-2,3-dihydrobenzo[d][1,3]oxaphosphol-2-yl)-6-isopropoxy-pyridine, L5**, white solid, 368 mg (1.02 mmol), 77% yield;  $^1\text{H}$  NMR (500 MHz,  $\text{CDCl}_3$ ):  $\delta$  7.33 (t,  $J$  = 7.8 Hz,

1H), 7.22 (t,  $J$  = 8.4 Hz, 1H), 6.64 (d,  $J$  = 8.2 Hz, 1H), 6.62 (d,  $J$  = 7.5 Hz, 1H), 6.39 (m, 2H), 5.86 (s, 1H), 5.14 (septet,  $J$  = 6.2 Hz, 1H), 3.72 (s, 3H), 1.25 (t,  $J$  = 6.0 Hz, 6H), 1.06 (d,  $J$  = 12.4 Hz, 9H);  $^{13}\text{C}$  NMR (125 MHz,  $\text{CDCl}_3$ ):  $\delta$  165.5, 162.8 (d,  $J_{C-P}$  = 1.9 Hz), 162.1 (d,  $J_{C-P}$  = 11.9 Hz), 158.5 (d,  $J_{C-P}$  = 14.6 Hz), 139.1 (d,  $J_{C-P}$  = 1.3 Hz), 132.3, 110.6 (d,  $J_{C-P}$  = 3.8 Hz), 109.4 (d,  $J_{C-P}$  = 2.6 Hz), 104.1, 103.0 (d,  $J_{C-P}$  = 1.8 Hz), 85.6 (d,  $J_{C-P}$  = 27.1 Hz), 68.3, 55.3, 32.2 (d,  $J_{C-P}$  = 22.3 Hz), 27.2 (d,  $J_{C-P}$  = 14.1 Hz), 22.0, 21.9;  $^{31}\text{P}$  NMR (202 MHz,  $\text{CDCl}_3$ ):  $\delta$  14.1; HRMS (ESI)  $[\text{M}+\text{H}]^+$   $m/z$  calcd for  $[\text{C}_{20}\text{H}_{27}\text{NO}_3\text{P}]^+$  is 360.1650, found 360.1723.

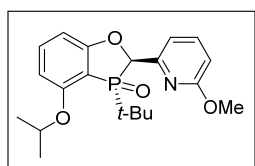

**(2R,3S)-3-(tert-butyl)-2-(6-isopropoxy-pyridin-2-yl)-4-methoxy-2H-benzo[d][1,3]oxaphosphole 3-oxide** White solid, 2.35 g (6.28 mmol), 66% yield; m.p: 101.0-103.0 °C;  $[\alpha]_{\text{D}}^{20}$  = + 19.0 (c 0.05, EtOH);  $^1\text{H}$  NMR

(400 MHz,  $\text{CDCl}_3$ ):  $\delta$  7.54 (t,  $J$  = 7.7 Hz, 1H), 7.39 (t,  $J$  = 8.2 Hz, 1H), 6.98 (dd,  $J$  = 7.9, 2.8 Hz, 1H), 6.63 (d,  $J$  = 8.2 Hz, 1H), 6.61 (d,  $J$  = 8.2 Hz, 1H), 6.48 (dd,  $J$  = 8.2, 4.2 Hz, 1H), 5.54 (d,  $J$  = 2.4 Hz, 1H), 5.24 (Septet,  $J$  = 6.1 Hz, 1H), 3.89 (s, 3H), 1.41 (d,  $J$  = 16.5 Hz, 9H), 1.39 (d,  $J$  = 6.0 Hz, 3H), 1.36 (d,  $J$  = 6.0 Hz, 3H);  $^{13}\text{C}$  NMR (125 MHz,  $\text{CDCl}_3$ ):  $\delta$  165.9 (d,  $J_{C-P}$  = 15.1 Hz), 163.6 (d,  $J_{C-P}$  = 1.6 Hz), 160.2 (d,  $J_{C-P}$  = 1.8 Hz), 152.1 (d,  $J_{C-P}$  = 4.4 Hz), 139.3 (d,  $J_{C-P}$  = 2.0

Hz), 136.5 (d,  $J_{C-P} = 1.1$  Hz), 114.1 (d,  $J_{C-P} = 3.0$  Hz), 110.0 (d,  $J_{C-P} = 2.1$  Hz), 105.6 (d,  $J_{C-P} = 5.4$  Hz), 105.4 (d,  $J_{C-P} = 5.6$  Hz), 103.9 (d,  $J_{C-P} = 89.6$  Hz), 78.4 (d,  $J_{C-P} = 53.8$  Hz), 71.2, 53.6, 34.2 (d,  $J_{C-P} = 72.8$  Hz), 25.5 (d,  $J_{C-P} = 0.9$  Hz), 22.1 (d,  $J_{C-P} = 5.9$  Hz);  $^{31}\text{P}$  NMR (202 MHz,  $\text{CDCl}_3$ ):  $\delta$  61.3; HRMS (ESI)  $[\text{M}+\text{H}]^+$   $m/z$  calcd for  $[\text{C}_{20}\text{H}_{27}\text{NO}_4\text{P}]^+$  is 376.1672, found 376.1669.

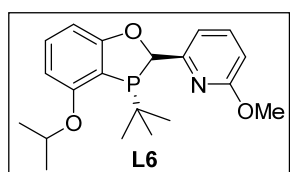

**2-((2R,3R)-3-(tert-butyl)-4-isopropoxy-2,3-dihydrobenzo[d][1,3]oxaphosphol-2-yl)-6-methoxypyridine L6:** White solid, 373 mg (1.04 mmol), 78% yield;  $^1\text{H}$  NMR (400 MHz,  $\text{CDCl}_3$ ):  $\delta$  7.41 (t,  $J = 7.7$  Hz, 1H), 7.23 (t,  $J = 8.0$  Hz, 1H), 6.74 (m, 1H), 6.66 (d,  $J = 8.2$  Hz, 1H), 6.51 (d,  $J = 8.2$  Hz, 1H), 6.44 (dd,  $J = 8.2, 3.6$  Hz, 1H), 5.90 (s, 1H), 4.57 (Septet,  $J = 6.0$  Hz, 1H), 3.88 (s, 3H), 1.31 (d,  $J = 6.0$  Hz, 3H), 1.28 (d,  $J = 6.0$  Hz, 3H), 1.14 (d,  $J = 12.0$  Hz, 9H);  $^{13}\text{C}$  NMR (125 MHz,  $\text{CDCl}_3$ ):  $\delta$  165.7, 163.7 (d,  $J_{C-P} = 1.7$  Hz), 160.6 (d,  $J_{C-P} = 11.4$  Hz), 159.1 (d,  $J_{C-P} = 14.1$  Hz), 139.1 (d,  $J_{C-P} = 1.1$  Hz), 132.3, 125.7, 111.2 (d,  $J_{C-P} = 3.6$  Hz), 108.9 (d,  $J_{C-P} = 2.6$  Hz), 105.0 (d,  $J_{C-P} = 1.8$  Hz), 103.6, 85.7 (d,  $J_{C-P} = 25.9$  Hz), 69.9, 53.0, 32.56 (d,  $J_{C-P} = 22.2$  Hz), 30.5, 27.4 (d,  $J_{C-P} = 13.5$  Hz), 22.1 (d,  $J_{C-P} = 16.3$  Hz);  $^{31}\text{P}$  NMR (202 MHz,  $\text{CDCl}_3$ ):  $\delta$  15.6; HRMS (ESI)  $[\text{M}+\text{H}]^+$   $m/z$  calcd for  $[\text{C}_{20}\text{H}_{27}\text{NO}_3\text{P}]^+$  is 360.1650, found 360.1695.

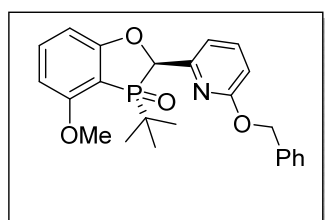

**(2R,3S)-2-(6-(benzyloxy)pyridin-2-yl)-3-(tert-butyl)-4-methoxy-2H-benzo[d][1,3]oxaphosphole 3-oxide:** white solid, 3.22 g (7.61 mmol), 80% yield; mp 148.0-150.0 °C;  $[\alpha]_D^{20} = +191.2$  (c 1.0, EtOH);  $^1\text{H}$  NMR (500 MHz,  $\text{CDCl}_3$ ):  $\delta$  7.57 (t,  $J = 7.7$  Hz, 1H), 7.44

(m, 3H), 7.36 (t,  $J = 7.7$  Hz, 2H), 7.31 (m, 1H), 7.10 (d,  $J = 7.6$  Hz, 1H), 6.68 (m, 2H), 6.51 (dd,  $J = 8.2, 4.1$  Hz, 1H), 5.54 (d,  $J = 2.7$  Hz, 1H), 5.36 (d,  $J = 12.1$  Hz, 1H), 5.28 (d,  $J = 12.1$  Hz, 1H), 3.87 (s, 3H), 1.38 (d,  $J = 16.6$  Hz, 9H);  $^{13}\text{C}$  NMR (125 MHz,  $\text{CDCl}_3$ ):  $\delta$  165.7 (d,  $J_{C-P} = 11.9$



Hz), 163.1, 161.7, 151.8 (d,  $J_{C-P} = 4.1$  Hz), 139.4 (d,  $J_{C-P} = 1.6$  Hz), 137.6, 136.7, 128.4 (d,  $J_{C-P} = 36.1$  Hz), 127.9, 114.5 (d,  $J_{C-P} = 2.6$  Hz), 110.5 (d,  $J_{C-P} = 1.6$  Hz), 106.2 (d,  $J_{C-P} = 5.0$  Hz), 103.7 (d,  $J_{C-P} = 5.3$  Hz), 78.4 (d,  $J_{C-P} = 58.4$  Hz), 67.8, 55.7, 34.1 (d,  $J_{C-P} = 74.0$  Hz), 25.2;  $^{31}\text{P}$  NMR (162 MHz,  $\text{CDCl}_3$ ):  $\delta$  61.6; HRMS (ESI)  $[\text{M}+\text{H}]^+$   $m/z$  calcd for  $[\text{C}_{24}\text{H}_{27}\text{NO}_4\text{P}]^+$  is 424.1599, found 424.1686.

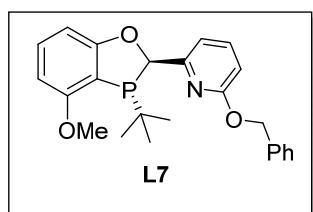

**2-(benzyloxy)-6-((2R,3R)-3-(tert-butyl)-4-methoxy-2,3-dihydrobenzo[d][1,3]oxa phosphol-2-yl)pyridine, L7:** white solid, 477 mg (1.17 mmol), 88% yield;  $^1\text{H}$  NMR (400 MHz,  $\text{CDCl}_3$ ):  $\delta$  7.18–7.38 (m, 7H), 6.68 (d,  $J = 7.9$  Hz, 1H), 6.65 (d,  $J = 8.0$  Hz, 1H), 6.50 (d,  $J = 8.0$  Hz, 1H), 6.42 (dd,  $J = 8.0, 3.4$  Hz, 1H), 5.85 (s, 1H), 5.27 (s, 2H), 1.07 (d,  $J = 12.4$  Hz, 9H);  $^{13}\text{C}$  NMR (100 MHz,  $\text{CDCl}_3$ ):  $\delta$  165.4, 163.0 (d,  $J_{C-P} = 1.8$  Hz), 162.2 (d,  $J_{C-P} = 11.9$  Hz), 158.6 (d,  $J_{C-P} = 14.6$  Hz), 139.1, 137.6, 132.4, 128.4 (d,  $J_{C-P} = 5.4$  Hz), 127.7, 111.5 (d,  $J_{C-P} = 3.8$  Hz), 109.3 (d,  $J_{C-P} = 2.6$  Hz), 104.2, 103.1 (d,  $J_{C-P} = 2.0$  Hz), 85.7 (d,  $J_{C-P} = 27.2$  Hz), 67.4, 55.4, 32.4 (d,  $J_{C-P} = 22.4$  Hz), 27.2 (d,  $J_{C-P} = 11.4$  Hz);  $^{31}\text{P}$  NMR (162 MHz,  $\text{CDCl}_3$ ):  $\delta$  13.7; HRMS (ESI)  $[\text{M}+\text{H}]^+$   $m/z$  calcd for  $[\text{C}_{24}\text{H}_{27}\text{NO}_3\text{P}]^+$  is 408.1650, found 408.1716.

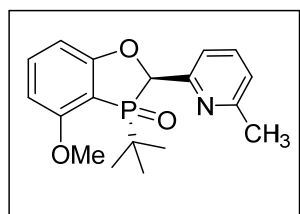

**(2R,3S)-3-(tert-butyl)-4-methoxy-2-(6-methylpyridin-2-yl)-2H-benzo[d][1,3]oxaphosphole 3-oxide,** white solid, 2.62 g (7.9 mmol), 83% yield; mp 142.0–144.0 °C;  $[\alpha]_{\text{D}}^{20} = +126.7$  (c 1.0, EtOH);  $^1\text{H}$  NMR (400 MHz,  $\text{CDCl}_3$ )  $\delta$  7.56 (t,  $J = 7.8$  Hz, 1H), 7.44 (t,  $J = 8.2$  Hz, 1H), 7.23 (d,  $J = 7.7$  Hz, 1H), 7.07 (d,  $J = 7.7$  Hz, 1H), 6.67 (dd,  $J = 8.3, 3.0$  Hz, 1H), 6.52 (dd,  $J = 8.2, 4.2$  Hz, 1H), 5.62 (d,  $J = 3.4$  Hz, 1H), 3.88 (s, 3H), 2.53 (s, 3H), 1.39 (d,  $J = 16.6$  Hz, 9H);  $^{13}\text{C}$  NMR (100 MHz,  $\text{CDCl}_3$ )  $\delta$  165.7 (d,  $J_{C-P} = 15.0$  Hz), 161.5 (d,  $J_{C-P} = 1.8$  Hz), 157.8, 153.5 ( $J_{C-P} = 3.4$  Hz), 136.8 (d,  $J_{C-P} = 1.8$  Hz), 136.5, 122.6 (d,  $J_{C-P} = 1.8$  Hz), 119.3 (d,  $J_{C-P} = 2.4$

Hz), 106.1 (d,  $J_{C-P} = 5.1$  Hz), 103.4 (d,  $J_{C-P} = 5.6$  Hz), 102.5, 79.4 (d,  $J_{C-P} = 54.2$  Hz), 55.5, 34.2 (d,  $J_{C-P} = 74.0$  Hz), 25.2, 24.4;  $^{31}\text{P}$  NMR (162 MHz,  $\text{CDCl}_3$ )  $\delta$  61.3; HRMS (ESI)  $[\text{M} + \text{H}]^+$   $m/z$  calcd for  $[\text{C}_{18}\text{H}_{23}\text{NO}_3\text{P}]^+$  332.1410, found 332.1395.

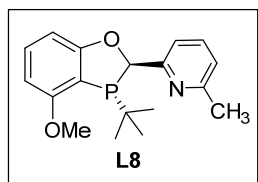

**2-((2R,3R)-3-(tert-butyl)-4-methoxy-2,3-dihydrobenzo[d][1,3]**

**oxaphosphol-2-yl)-6-methylpyridine**, white solid, 398 mg (1.26 mmol),

95% yield;  $^1\text{H}$  NMR (400 MHz,  $\text{CDCl}_3$ )  $\delta$  7.40 (t,  $J = 7.8$  Hz, 1H), 7.29 (t,

$J = 6.8$  Hz, 2H), 6.92 (t,  $J = 6.8$  Hz, 2H), 7.72 (dd,  $J = 8.1, 0.7$  Hz, 1H), 6.50 (ddd,  $J = 8.2, 3.7,$

0.5 Hz, 1H), 5.99 (d,  $J = 0.6$  Hz, 1H), 3.79 (s, 3H), 2.52 (s, 3H), 1.13 (d,  $J = 12.3$  Hz, 9H);  $^{13}\text{C}$

NMR (100 MHz,  $\text{CDCl}_3$ )  $\delta$  165.4, 162.2 (d,  $J_{C-P} = 11.8$  Hz), 160.5 (d,  $J_{C-P} = 15.0$  Hz), 158.1

(d,  $J_{C-P} = 1.8$  Hz), 136.6 ( $J_{C-P} = 1.1$  Hz), 132.4, 121.4 (d,  $J_{C-P} = 2.5$  Hz), 116.1 (d,  $J_{C-P} = 4.2$

Hz), 109.5 (d,  $J_{C-P} = 17.5$  Hz), 104.1, 103.1 (d,  $J_{C-P} = 1.9$  Hz), 86.4 (d,  $J_{C-P} = 27.7$  Hz), 55.3,

32.5 (d,  $J_{C-P} = 22.1$  Hz), 27.3 (d,  $J_{C-P} = 14.1$  Hz), 24.5;  $^{31}\text{P}$  NMR (202 MHz,  $\text{CDCl}_3$ )  $\delta$  12.6;

HRMS (ESI)  $[\text{M} + \text{H}]^+$   $m/z$  calcd for  $[\text{C}_{18}\text{H}_{23}\text{NO}_2\text{P}]^+$  316.1461, found 316.1449.

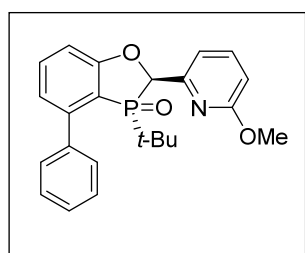

**(2R,3S)-3-(tert-butyl)-2-(6-methoxypyridin-2-yl)-4-phenyl-2H-**

**benzo [d][1,3]oxaphosphole 3-oxide** White solid, 1.57 g (3.99 mmol),

42% yield; m.p: 138.0-140.0 °C;  $[\alpha]_{\text{D}}^{20} = + 2.22$  (c 0.05, EtOH);  $^1\text{H}$

NMR (500 MHz,  $\text{CDCl}_3$ ):  $\delta$  7.73 (d,  $J = 7.3$  Hz, 1H), 7.57 (m, 2H), 7.37

(m, 3H), 7.08 (m, 2H), 7.03 (d,  $J = 7.1$  Hz, 1H), 6.65 (d,  $J = 8.3$  Hz, 1H), 5.59 (s, 1H), 3.02 (s,

3H), 0.90 (d,  $J = 16.3$  Hz, 9H);  $^{13}\text{C}$  NMR (125 MHz,  $\text{CDCl}_3$ ):  $\delta$  164.7 (d,  $J_{C-P} = 18.2$  Hz), 163.7

(d,  $J_{C-P} = 1.3$  Hz), 152.4 (d,  $J_{C-P} = 4.4$  Hz), 147.2 (d,  $J_{C-P} = 5.5$  Hz), 140.8 (d,  $J_{C-P} = 2.0$  Hz),

135.0 (d,  $J_{C-P} = 1.7$  Hz), 130.1, 128.6, 128.5, 124.0 (d,  $J_{C-P} = 8.1$  Hz), 113.4 (d,  $J_{C-P} = 3.2$

Hz), 112.5 (d,  $J_{C-P} = 85.8$  Hz), 112.5 (d,  $J_{C-P} = 5.3$  Hz), 110.1 (d,  $J_{C-P} = 2.3$  Hz), 77.0 (d,  $J_{C-P} =$

56.0 Hz), 53.5, 34.6 (d,  $J_{C-P} = 70.3$  Hz), 24.5;  $^{31}\text{P}$  NMR (202 MHz,  $\text{CDCl}_3$ ):  $\delta$  62.2; HRMS (ESI)  $[\text{M}+\text{H}]^+$   $m/z$  calcd for  $[\text{C}_{23}\text{H}_{25}\text{NO}_3\text{P}]^+$  is 394.1494, found 394.1467.

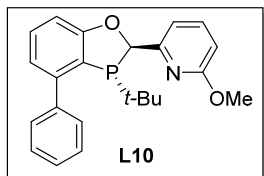

**2-((2R,3R)-3-(tert-butyl)-4-phenyl-2,3-dihydro benzo [d] [1,3] oxaphosphol-2-yl)-6-methoxypyridine, L10:** White solid, 447 mg (1.18

mmol), 89% yield;  $^1\text{H}$  NMR (500 MHz,  $\text{CDCl}_3$ ):  $\delta$  7.62 (t,  $J = 7.2$  Hz, 1H),

7.49 (t,  $J = 7.6$  Hz, 1H), 7.39 (t,  $J = 7.6$  Hz, 1H), 7.35 (m, 1H), 7.35 (m, 2H), 7.28 (m, 1H), 7.04 (d,  $J = 7.6$  Hz, 1H), 7.01 (dd,  $J = 7.3, 3.5$  Hz, 1H), 6.83 (d,  $J = 7.4$  Hz, 1H), 6.58 (d,  $J = 8.2$  Hz, 1H), 5.88 (s, 1H), 3.88 (s, 3H), 0.78 (d,  $J = 8.2$  Hz, 9H);  $^{13}\text{C}$  NMR (125 MHz,  $\text{CDCl}_3$ ):  $\delta$  164.9, 163.9 (d,  $J_{C-P} = 2.0$  Hz), 158.9 (d,  $J_{C-P} = 14.7$  Hz), 146.5 (d,  $J_{C-P} = 12.5$  Hz), 142.6, 139.3 (d,  $J_{C-P} = 1.3$  Hz), 131.6, 129.3 (d,  $J_{C-P} = 4.9$  Hz), 128.6, 127.6, 122.5 (d,  $J_{C-P} = 2.7$  Hz), 121.1 (d,  $J_{C-P} = 22.5$  Hz), 111.5 (d,  $J_{C-P} = 3.8$  Hz), 110.0, 109.2 (d,  $J_{C-P} = 2.5$  Hz), 85.2 (d,  $J_{C-P} = 27.4$  Hz), 77.4, 53.3, 32.8 (d,  $J_{C-P} = 23.0$  Hz), 26.9 (d,  $J_{C-P} = 13.7$  Hz);  $^{31}\text{P}$  NMR (202 MHz,  $\text{CDCl}_3$ ):  $\delta$  15.7; HRMS (ESI)  $[\text{M}+\text{H}]^+$   $m/z$  calcd for  $[\text{C}_{23}\text{H}_{25}\text{NO}_2\text{P}]^+$  is 378.1545, found 378.1533.

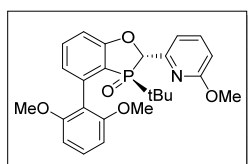

**(2S,3R)-3-(tert-butyl)-4-(2,6-dimethoxyphenyl)-2-(6-methoxypyridinyl)-**

**2H-benzo[d][1,3]oxaphosphole 3-oxide:** white solid, 2.2 g (4.85 mmol),

51% yield; mp 196.0-198.0 °C;  $[\alpha]_{\text{D}}^{20} = -63.1$  (c 1.0, EtOH);  $^1\text{H}$  NMR (500

MHz,  $\text{CDCl}_3$ ):  $\delta$  7.56 (m, 1H), 7.27 (m, 1H), 7.01 (m, 3H), 6.63 (d,  $J = 8.2$  Hz, 1H), 6.58 (t,  $J = 7.5$  Hz, 2H), 5.50 (s, 1H), 3.87 (s, 3H), 3.75 (s, 3H), 3.57 (m, 3H), 0.98 (m, 9H);  $^{13}\text{C}$  NMR (125 MHz,  $\text{CDCl}_3$ ):  $\delta$  164.4 (d,  $J_{C-P} = 17.9$  Hz), 163.5 (d,  $J_{C-P} = 1.4$  Hz), 159.0, 157.5, 152.5 (d,  $J_{C-P} = 3.9$  Hz), 139.0 (d,  $J_{C-P} = 1.9$  Hz), 139.0, 134.3 (d,  $J_{C-P} = 1.8$  Hz), 130.0, 125.5 (d,  $J_{C-P} = 8.3$  Hz), 117.6 (d,  $J_{C-P} = 1.8$  Hz), 114.4 (d,  $J_{C-P} = 89.0$  Hz), 114.29 (d,  $J_{C-P} = 3.0$  Hz), 112.3 (d,  $J_{C-P} = 5.5$  Hz), 111.0 (d,  $J_{C-P} = 2.1$  Hz), 104.8, 103.1, 77.6 (d,  $J_{C-P} = 55.1$  Hz), 56.2, 55.4, 53.4, 34.2

(d,  $J_{C-P} = 72.9$  Hz), 24.2 (d,  $J_{C-P} = 0.5$  Hz);  $^{31}\text{P}$  NMR (202 MHz,  $\text{CDCl}_3$ ):  $\delta$  59.8; HRMS (ESI)  $[\text{M}+\text{H}]^+$   $m/z$  calcd for  $[\text{C}_{25}\text{H}_{29}\text{NO}_5\text{P}]^+$  is 454.1778, found 454.1776.

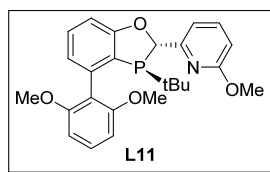

**2-((2S,3S)-3-(tert-butyl)-4-(2,6-dimethoxyphenyl)-2,3-dihydro**

**benzo[d][1,3]oxaphosphol-2-yl)-6-methoxypyridine, L11:** white solid,

407.6 mg (0.93 mmol), 70% yield;  $^1\text{H}$  NMR (500 MHz,  $\text{CDCl}_3$ ):  $\delta$  7.36

(t,  $J = 7.5$  Hz, 1H), 7.29 (t,  $J = 7.5$  Hz, 1H), 7.14 (m, 1H), 6.94 (m, 1H), 6.81 (m, 1H), 6.70 (m, 1H), 6.45 (m, 3H), 5.77 (s, 1H), 3.79 (s, 3H), 3.65 (s, 3H), 3.23 (m, 3H), 0.78 (m, 9H);  $^{13}\text{C}$  NMR (125 MHz,  $\text{CDCl}_3$ ):  $\delta$  164.1, 163.5 (d,  $J_{C-P} = 1.7$  Hz), 159.2, 157.5 (d,  $J_{C-P} = 76.1$  Hz), 139.0 (d,  $J_{C-P} = 1.3$  Hz), 130.8 (d,  $J_{C-P} = 1.9$  Hz), 129.2, 124.3 (d,  $J_{C-P} = 3.8$  Hz), 116.7 (d,  $J_{C-P} = 4.1$  Hz), 109.4 (d,  $J_{C-P} = 0.5$  Hz), 108.6 (d,  $J_{C-P} = 2.5$  Hz), 104.6, 103.7, 85.8 (d,  $J_{C-P} = 29.1$  Hz), 55.6 (d,  $J_{C-P} = 2.3$  Hz), 55.6 (d,  $J_{C-P} = 5.5$  Hz), 53.3, 31.9 (d,  $J_{C-P} = 20.9$  Hz), 26.8 (d,  $J_{C-P} = 14.8$  Hz);  $^{31}\text{P}$  NMR (202 MHz,  $\text{CDCl}_3$ ):  $\delta$  18.6; HRMS (ESI)  $[\text{M}+\text{H}]^+$   $m/z$  calcd for  $[\text{C}_{25}\text{H}_{29}\text{NO}_4\text{P}]^+$  is 438.1829, found 438.1861.

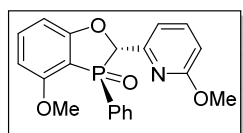

**(2S,3R)-4-methoxy-2-(6-methoxypyridin-2-yl)-3-phenyl-2H-benzo[d]**

**[1,3]oxaphosphole 3-oxide:** White solid, 1.92 g (5.23 mmol), 55% yield;

m.p: 226.0-228.0 °C;  $[\alpha]_D^{20} = +14.9$  (c 0.05, EtOH);  $^1\text{H}$  NMR (400 MHz,  $\text{CDCl}_3$ ):  $\delta$  7.55 (t,  $J = 8.4$  Hz, 1H), 7.31 (m, 4H), 7.15 (dt,  $J = 7.2, 3.0$  Hz, 2H), 6.82 (dd,  $J = 8.4, 3.5$  Hz, 1H), 6.77 (d,  $J = 7.5$  Hz, 1H), 6.52 (dd,  $J = 8.1, 4.6$  Hz, 1H), 6.28 (d,  $J = 8.3$  Hz, 1H), 5.90 (d,  $J = 14.1$  Hz, 1H), 3.70 (s, 3H), 3.64 (s, 3H);  $^{13}\text{C}$  NMR (125 MHz,  $\text{CDCl}_3$ ):  $\delta$  167.2 (d,  $J_{C-P} = 17.6$  Hz), 163.3 (d,  $J_{C-P} = 2.2$  Hz), 162.1 (d,  $J_{C-P} = 1.1$  Hz), 152.5 (d,  $J_{C-P} = 1.2$  Hz), 138.8 (d,  $J_{C-P} = 2.2$  Hz), 137.7 (d,  $J_{C-P} = 0.7$  Hz), 132.0 (d,  $J_{C-P} = 3.0$  Hz), 131.8 (d,  $J_{C-P} = 10.5$  Hz), 128.7 (d,  $J_{C-P} = 111.8$  Hz), 127.8 (d,  $J_{C-P} = 13.4$  Hz), 11.7 (d,  $J_{C-P} = 4.2$  Hz), 109.5 (d,  $J_{C-P} = 2.8$  Hz), 106.3 (d,  $J = 5.7$  Hz), 103.9 (d,  $J = 5.2$  Hz), 103.3 (d,  $J = 102.5$  Hz), 84.4 (d,  $J = 66.9$  Hz), 56.0, 53.4;  $^{31}\text{P}$

NMR (202 MHz, CDCl<sub>3</sub>):  $\delta$  45.6; HRMS (ESI) [M+H]<sup>+</sup> *m/z* calcd for [C<sub>20</sub>H<sub>19</sub>NO<sub>4</sub>P]<sup>+</sup> is 368.1046, found 368.1051.

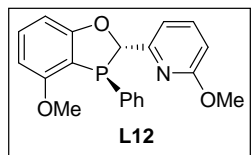

**2-methoxy-6-((2S,3S)-4-methoxy-3-phenyl-2,3-dihydrobenzo[d][1,3]oxaphosphol-2-yl)pyridine, L12:** White solid, 201 mg (0.57 mmol), 43% yield;

<sup>1</sup>H NMR (500 MHz, CDCl<sub>3</sub>):  $\delta$  7.30 (d, *J* = 8.4 Hz, 1H), 7.06 (d, *J* = 7.7 Hz, 1H), 7.01 (m, 1H), 6.91 (d, *J* = 7.5 Hz, 2H), 6.68 (m, 3H), 6.47 (dd, *J* = 8.0, 3.7 Hz, 1H), 6.40 (d, *J* = 7.2 Hz, 2H), 6.26 (dt, *J* = 8.3 Hz, 1H), 6.05 (d, *J* = 27.5 Hz, 1H), 3.84 (s, 3H), 3.70 (s, 3H); <sup>13</sup>C NMR (125 MHz, CDCl<sub>3</sub>):  $\delta$  165.1, 163.0, 161.9 (d, *J*<sub>C-P</sub> = 11.4 Hz), 154.3 (d, *J*<sub>C-P</sub> = 3.6 Hz), 138.6, 133.3, 133.1 (d, *J*<sub>C-P</sub> = 19.6 Hz), 129.1, 127.8 (d, *J*<sub>C-P</sub> = 6.5 Hz), 112.8 (d, *J*<sub>C-P</sub> = 2.1 Hz), 108.3 (d, *J*<sub>C-P</sub> = 1.8 Hz), 105.0, 103.7 (d, *J*<sub>C-P</sub> = 1.8 Hz), 88.9 (d, *J*<sub>C-P</sub> = 27.0 Hz), 56.0, 53.5; <sup>31</sup>P NMR (202 MHz, CDCl<sub>3</sub>):  $\delta$  -20.7; HRMS (ESI) [M+H]<sup>+</sup> *m/z* calcd for [C<sub>20</sub>H<sub>19</sub>NO<sub>3</sub>P]<sup>+</sup> is 352.1097, found 352.1102.

### General procedure for the syntheses of pyridinium salts:

A 100 mL 3-neck round bottom flask equipped with a magnetic stir bar was charged with 2-benzylpyridine (2.0 g, 11.81 mmol) and toluene (5 mL). To this solution added benzyl bromide (2.01 g, 11.81 mmol) in one portion, and the resulting mixture was heated at reflux for 14 h. The solvent was evaporated under reduced pressure and recrystallized using DCM (5 mL)/methyl tertiary butyl ether (15 mL) to yield the desired product.

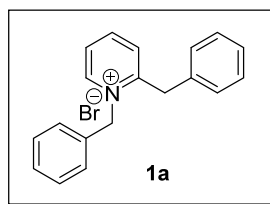

**1,2-dibenzylpyridinium bromide, 1a,** White solid (2.86 g, 71%). <sup>1</sup>H NMR (500 MHz, CDCl<sub>3</sub>):  $\delta$  9.59 (d, *J* = 6.1 Hz, 1H), 8.39 (t, *J* = 7.6 Hz, 1H), 7.95 (t, *J* = 7.6 Hz, 1H), 7.63 (d, *J* = 8.1 Hz, 1H), 7.35 (m, 8H), 7.13 (m, 2H), 6.29 (s, 2H), 4.63 (s, 2H). <sup>13</sup>C NMR (125 MHz, CDCl<sub>3</sub>):  $\delta$  157.9, 147.0, 145.6, 133.3,

132.0, 129.7, 129.6, 129.57, 129.53, 128.3, 128.2, 126.2, 61.4, 39.0. HRMS (ESI)  $[M]^+$   $m/z$  calcd for  $[C_{19}H_{18}N]^+$  is 260.1436, found 260.1434.

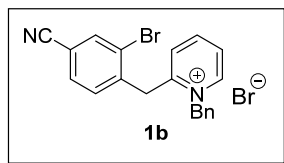

**1-benzyl-2-(2-bromo-4-cyanobenzyl)pyridinium bromide, 1b,**

Synthesized according to the literature procedures:<sup>1</sup>H NMR (400 MHz,

CDCl<sub>3</sub>):  $\delta$  9.82 (d,  $J = 5.9$  Hz, 1H), 8.28(d,  $J = 8.0$  Hz, 1H), 7.97 (t,  $J =$

6.6 Hz, 1H), 7.89 (t,  $J = 7.8$  Hz, 1H), 7.81 (d,  $J = 1.6$  Hz, 1H), 7.60 (dd,  $J = 7.9, 1.5$  Hz, 1H),

7.37-7.30 (m, 5H), 7.09 (d,  $J = 7.9$  Hz, 1H), 6.49 (s, 3H), 5.02 (s, 1H); <sup>13</sup>C NMR (100 MHz,

CDCl<sub>3</sub>):  $\delta$  156.0, 147.8, 145.4, 139.0, 136.3, 134.0, 132.2, 131.5, 129.8, 129.7, 128.3, 127.9,

126.3, 125.8, 116.8, 114.2, 62.3, 39.8.

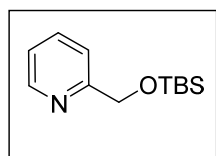

**2-(((tert-butyldimethylsilyl)oxy)methyl)pyridine:** To a solution of pyridin-

2-ylmethanol (4.00 g, 36.35 mmol) and imidazole (6.18 g, 90.31 mmol) in

DCM (15 mL) at rt was added tert-butylchlorodimethylsilane (6.07 g, 40.31

mmol). The reaction mixture was stirred for 2 h at room temperature. The mixture was extracted

with DCM, and the organic layer was washed with water and brine, and dried over sodium

sulfate. After filtration of the mixture and evaporation of the solvent, the crude product was

purified by column chromatography to afford 2-(((tert-butyldimethylsilyl)oxy)methyl)pyridine

(7.45 g, 91%) as a colorless oil. <sup>1</sup>H NMR (500 MHz, CDCl<sub>3</sub>):  $\delta$  8.47 (d,  $J = 4.9$  Hz, 1H), 7.66 (m,

1H), 7.48 (m, 1H), 7.10 (m, 1H), 4.81 (s, 2H), 0.94 (s, 9H), 0.10 (s, 6H); <sup>13</sup>C NMR (125 MHz,

CDCl<sub>3</sub>):  $\delta$  161.5, 148.8, 136.8, 121.9, 120.1, 66.2, 26.0, 18.5; HRMS (ESI)  $[M+1]$   $m/z$  calcd for

$[C_{12}H_{22}NOSi]^+$  is 224.1392, found 224.1470.

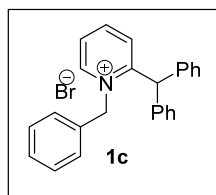

**2-benzhydryl-1-benzylpyridinium bromide, 1c,** white solid, 3.39 g, 69%

yield. <sup>1</sup>H NMR (500 MHz, CDCl<sub>3</sub>):  $\delta$  10.00 (d,  $J = 6.4$  Hz, 1H), 8.32 (t,  $J =$

8.2 Hz, 1H), 8.03 (t,  $J = 7.0$  Hz, 1H), 7.46-7.41 (m, 4H), 7.40-7.36 (m, 6H), 7.19 (m, 2H), 6.97 (m, 2H), 6.21 (s, 2H), 6.17 (s, 1H);  $^{13}\text{C}$  NMR (125 MHz,  $\text{CDCl}_3$ ):  $\delta$  159.9, 148.7, 144.9, 137.3, 132.3, 130.9, 130.0, 129.99, 129.9, 129.3, 128.9, 128.2, 126.2, 61.5, 53.0; HRMS (ESI)  $[\text{M}]^+$   $m/z$  calcd for  $[\text{C}_{55}\text{H}_{22}\text{N}]^+$  is 336.1747, found 336.1753.

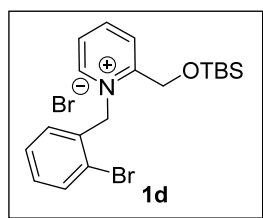

**1-(2-bromobenzyl)-2-(((tert-butyldimethylsilyl)oxy)methyl)**

**pyridinium bromide, 1d:** To a solution of 2-(((tert-butyldimethylsilyl)oxy)methyl)pyridine (3.00 g, 13.42 mmol) in toluene (3 mL) was added 2-bromo benzyl bromide (3.69 g, 14.76 mmol) in one portion, and the

resulting mixture was heated at reflux for 12 h. The solvent was evaporated under reduced pressure and recrystallized using DCM (10 mL)/methyl tertiary butyl ether (40 mL) to get the desired product as white crystalline solid, 5.142 g (81 %).  $^1\text{H}$  NMR (500 MHz,  $\text{CDCl}_3$ ):  $\delta$  9.15 (d,  $J = 6.1$  Hz, 1H), 8.55 (t,  $J = 7.7$  Hz, 1H), 8.20 (d,  $J = 8.1$  Hz, 1H), 8.00 (t,  $J = 6.8$  Hz, 1H), 7.61 (m, 2H), 7.38 (m, 1H), 7.30 (m, 1H), 6.24 (s, 2H), 5.17 (s, 2H), 0.88 (s, 9H), 0.12 (s, 6H);  $^{13}\text{C}$  NMR (125 MHz,  $\text{CDCl}_3$ ):  $\delta$  157.4, 146.0, 145.6, 133.7, 132.5, 131.9, 130.7, 129.1, 125.7, 126.5, 124.5, 61.5, 60.1, 25.8, 18.3, -5.1; HRMS (ESI)  $[\text{M}]^+$   $m/z$  calcd for  $[\text{C}_{19}\text{H}_{27}\text{BrNOSi}]^+$  is 392.1040, found 392.1040.

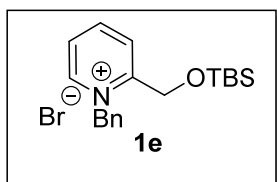

**1-benzyl-2-(((tert-butyldimethylsilyl)oxy)methyl)pyridinium bromide,**

**1e,** white solid, 3.73 g, 84%.  $^1\text{H}$  NMR (500 MHz,  $\text{CDCl}_3$ ):  $\delta$  9.82 (d,  $J = 6.4$  Hz, 1H), 8.47 (t,  $J = 7.7$  Hz, 1H), 8.14 (d,  $J = 7.7$  Hz, 1H), 8.02 (t,  $J =$

7.7 Hz, 1H), 7.37-7.30 (m, 5H), 6.31 (s, 2H), 5.17 (s, 2H), 4.92 (s, 2H), 0.87 (s, 9H), 0.09 (s, 6H);  $^{13}\text{C}$  NMR (125 MHz,  $\text{CDCl}_3$ ):  $\delta$  157.9, 147.3, 145.5, 131.9, 129.8, 129.7, 128.4, 126.7, 126.1, 61.5, 61.3, 25.9, 18.3, -5.1; HRMS (ESI)  $[\text{M}]^+$   $m/z$  calcd for  $[\text{C}_{19}\text{H}_{28}\text{NOSi}]^+$  is 314.1935, found 314.1944.

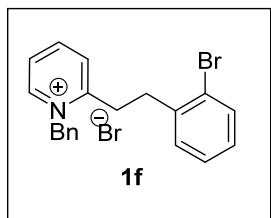

**1-benzyl-2-(2-bromophenethyl)pyridinium bromide, 1f:** Synthesized

according to the literature procedure:<sup>1</sup> <sup>1</sup>H NMR (400 MHz, CDCl<sub>3</sub>):

δ 9.69 (d, *J* = 5.9 Hz, 1H), 7.63 (d, *J* = 8.1 Hz, 1H), 8.43 (t, *J* = 7.8 Hz,

1H), 7.98 (t, *J* = 7.1 Hz, 1H), 7.89 (d, *J* = 8.1 Hz, 1H), 7.48 (d, *J* = 8.1 Hz,

1H), 7.36-7.31 (m, 3H), 7.26-7.22 (m, 2H), 7.20-7.16 (m, 2H), 7.11-7.05 (m, 1H), 6.24 (s, 2H),

3.45 (t, *J* = 7.9 Hz, 2H), 3.07 (t, *J* = 7.4 Hz, 2H); <sup>13</sup>C NMR (100 MHz, CDCl<sub>3</sub>): δ 157.6 147.5

145.7, 137.4, 133.1, 132.6, 131.1, 129.8, 129.7, 129.6, 129.2, 128.3, 127.9, 126.5, 124.3, 61.5,

34.9, 34.2.

**Synthesis of 2-(2-(1,3-dioxan-2-yl)ethyl)pyridine:<sup>2</sup>**

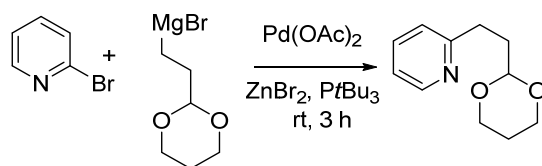

A 250 mL 3-neck round bottom flask equipped with a magnetic stir bar was charged 2-bromopyridine (2.00 g, 12.65 mmol), tri-tertbutylphosphine (0.14 mmol, 41 mg) and degassed THF (15 mL) under N<sub>2</sub> atmosphere. To this suspension added Pd(OAc)<sub>2</sub> (141 mg, 0.63 mmol, 0.05 equiv) and zinc bromide (854 mg, 3.79 mmol). After 5 min (2-(1,3-dioxolan-2-yl)ethyl) magnesium bromide (0.50 M in THF, 30.3 mL, 15.18 mmol, 1.2 equiv) was added slowly over 30 min while maintaining the temperature at 20-25 °C. The reaction mixture was stirred at room temperature for an additional 2 h and monitored by UPLC. Upon completion, the reaction was cooled to 0 °C, and water (20 mL) was added slowly while maintaining the temperature below 15 °C. Ethyl acetate (30 mL) was added, and the aqueous layer was extracted with ethyl acetate (2 x 30 mL). The combined organic layers were dried over sodium sulfate, filtered, and concentrated. The crude mixture was purified by chromatography with 60% ethyl acetate/



hexanes, the product was obtained as colorless liquid, 1.86 g, 76 % yield.  $^1\text{H}$  NMR (500 MHz,  $\text{CDCl}_3$ ):  $\delta$  8.41 (d,  $J = 4.9$  Hz, 1H), 7.46 (t,  $J = 7.6$  Hz, 1H), 7.04 (d,  $J = 7.7$  Hz, 1H), 6.98 (t,  $J = 6.2$  Hz, 1H), 4.44 (t,  $J = 5.0$  Hz, 1H), 3.99 (dd,  $J = 11.2, 5.0$  Hz, 2H), 3.63 (m, 2H), 2.79 (t,  $J = 7.9$  Hz, 1H), 1.95 (m, 3H), 1.21 (m, 1H);  $^{13}\text{C}$  NMR (125 MHz,  $\text{CDCl}_3$ ):  $\delta$  161.4, 149.1, 136.2, 122.7, 1209, 101.4, 66.7, 34.7, 32.4, 25.7; HRMS (ESI)  $[\text{M}+\text{H}]^+$   $m/z$  calcd for  $[\text{C}_{11}\text{H}_{15}\text{NO}_2]^+$  is 194.1103, found 194.1185.

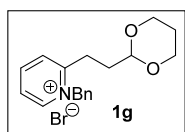

**2-(2-(1,3-dioxan-2-yl)ethyl)pyridine 1g:** light brown solid, 2.16 g (76.5%).  $^1\text{H}$

NMR (500 MHz,  $\text{CDCl}_3$ ):  $\delta$  9.61 (d,  $J = 6.2$  Hz, 1H), 8.42 (d,  $J = 7.5$  Hz, 1H), 7.94 (t,  $J = 7.6$  Hz, 1H), 7.91 (d,  $J = 8.0$  Hz, 1H), 7.35-7.29 (m, 3H), 7.23 (m, 2H), 6.19 (s, 1H), 4.63 (m, 1H), 4.00 (m, 2H), 3.70 (m, 2H), 3.24 (t,  $J = 7.3$  Hz, 1H), 2.11 (m, 2H), 2.02-1.92 (m, 3H), 1.30 (m, 1H);  $^{13}\text{C}$  NMR (125 MHz,  $\text{CDCl}_3$ ):  $\delta$  159.2, 147.4, 145.5, 132.9, 129.7, 129.5, 129.4, 127.9, 126.3, 99.6, 66.9, 61.1, 33.6, 27.0, 25.6; HRMS (ESI)  $[\text{M}]^+$   $m/z$  calcd for  $[\text{C}_{18}\text{H}_{22}\text{NO}_2]^+$  is 284.1645, found 284.1648.

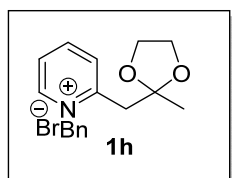

**1-benzyl-2-((2-methyl-1,3-dioxolan-2-yl)methyl)pyridinium bromide, 1h:**

light brown solid, 2.73 g, 66%.  $^1\text{H}$  NMR (500 MHz,  $\text{CDCl}_3$ ):  $\delta$  9.83 (d,  $J = 6.3$  Hz, 1H), 8.37 (d,  $J = 7.8$  Hz, 1H), 8.06 (t,  $J = 7.6$  Hz, 1H), 7.88 (d,  $J = 8.0$  Hz, 1H), 7.42-7.37 (m, 3H), 7.23 (m, 2H), 6.19 (s, 2H), 3.90 (m, 2H), 3.58 (m, 2H), 3.53 (s, 2H), 1.48 (s, 3H);  $^{13}\text{C}$  NMR (125 MHz,  $\text{CDCl}_3$ ):  $\delta$  153.2, 148.3, 144.3, 132.0, 130.1, 129.9, 129.7, 129.0, 128.0, 127.1, 108.5, 65.3, 62.1, 42.3, 25.7; HRMS (ESI)  $[\text{M}]^+$   $m/z$  calcd for  $[\text{C}_{17}\text{H}_{20}\text{NO}_2]^+$  is 270.1489, found 270.1508.

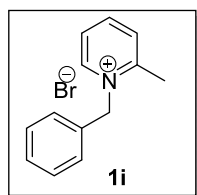

**1-benzyl-2-methylpyridinium bromide, 1i:** white crystalline solid, 2.24 g,

72%.  $^1\text{H}$  NMR (500 MHz,  $\text{CDCl}_3$ ):  $\delta$  9.48 (d,  $J = 6.3$  Hz, 1H), 8.41 (t,  $J = 7.6$  Hz, 1H), 7.94 (m, 1H), 7.32-7.27 (m, 3H), 7.25 (m, 1H), 6.15 (s, 2H), 2.86 (s,

3H).  $^{13}\text{C}$  NMR (125 MHz,  $\text{CDCl}_3$ ):  $\delta$  155.4, 146.3, 145.8, 132.0, 130.6, 129.0, 126.0, 61.4, 21.2.

HRMS (ESI)  $[\text{M}]^+$   $m/z$  calcd for  $[\text{C}_{13}\text{H}_{44}\text{N}]^+$  is 184.1121, found 184.1129.

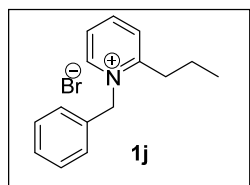

**1-benzyl-2-propylpyridinium bromide, 1j:** white crystalline solid (3.66 g, 76%).  $^1\text{H}$  NMR (500 MHz,  $\text{CDCl}_3$ ):  $\delta$  9.65 (d,  $J = 6.5$  Hz, 1H), 8.49 (t,  $J = 8.0$  Hz, 1H), 7.91 (m, 2H), 7.28 (m, 3H), 7.19 (m, 2H), 6.18 (s, 2H),

3.06 (m, 1H), 1.60 (m, 2H), 0.90, (t,  $J = 8.0$  Hz, 3H);  $^{13}\text{C}$  NMR (125 MHz,  $\text{CDCl}_3$ ):  $\delta$  158.8, 147.1, 145.9, 132.6, 129.5, 129.5, 129.32, 129.30, 128.9, 127.6, 125.9, 61.1, 34.

5, 21.5, 13.64, 13.62. HRMS (ESI)  $[\text{M}]^+$   $m/z$  calcd for  $[\text{C}_{15}\text{H}_{18}\text{N}]^+$  is 212.1434, found 212.1442.

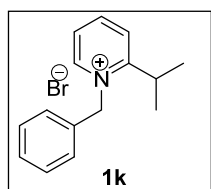

**1-benzyl-2-isopropylpyridinium bromide, 1k:** light brown solid, 2.0 g, 58%.  $^1\text{H}$  NMR (500 MHz,  $\text{CDCl}_3$ ):  $\delta$  9.96 (d,  $J = 5.9$  Hz, 1H), 8.42 (t,  $J = 7.8$  Hz, 1H), 7.97 (m, 1H), 7.40 (m, 3H), 7.23 (m, 2H), 6.39 (s, 1H), 3.63 (m, 1H),

1.32 (m, 6H);  $^{13}\text{C}$  NMR (125 MHz,  $\text{CDCl}_3$ ):  $\delta$  164.6, 147.4, 146.1, 133.1, 129.5, 129.2, 127.2, 126.4, 126.0, 61.4, 30.6, 22.6. HRMS (ESI)  $[\text{M}]^+$   $m/z$  calcd for  $[\text{C}_{15}\text{H}_{18}\text{N}]^+$  is 212.1434, found 212.1429.

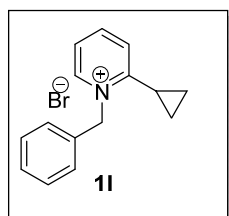

**1-benzyl-2-cyclopropylpyridinium bromide, 1l:** white crystalline solid, 2.05 g, 60%;  $^1\text{H}$  NMR (500 MHz,  $\text{CDCl}_3$ ):  $\delta$  9.62 (d,  $J = 6.3$  Hz, 1H), 8.48 (t,  $J = 7.6$  Hz, 1H), 7.89 (t,  $J = 6.7$  Hz, 1H), 7.69 (d,  $J = 8.0$  Hz, 1H), 7.32-7.24 (m, 5H), 6.34 (s, 2H), 2.44-2.38 (m, 1H), 1.33-1.27 (m, 2H), 1.07 (m,

2H);  $^{13}\text{C}$  NMR (125 MHz,  $\text{CDCl}_3$ ):  $\delta$  159.3, 147.0, 146.4, 132.6, 129.4, 127.8, 126.0, 61.2, 14.3, 10.7; HRMS (ESI)  $[\text{M}]^+$   $m/z$  calcd for  $[\text{C}_{15}\text{H}_{16}\text{N}]^+$  is 210.1277, found 210.1273.

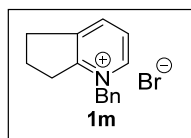

**1-benzyl-6,7-dihydro-5H-cyclopenta[b]pyridinium bromide, 1m:** Light gray solid, 2.95 g, 86% yield.  $^1\text{H}$  NMR (500 MHz,  $\text{CDCl}_3$ ):  $\delta$  9.41 (d,  $J = 6.0$

Hz, 1H), 8.17 (d,  $J = 7.8$  Hz, 1H), 7.80 (d,  $J = 7.0$  Hz, 1H), 7.44-7.41 (m, 2H), 7.39-7.35 (m, 3H), 6.19 (s, 2H), 3.50 (t,  $J = 7.9$  Hz, 2H), 3.15 (t,  $J = 7.8$  Hz, 2H), 2.33 (m, 2H);  $^{13}\text{C}$  NMR (125 MHz,  $\text{CDCl}_3$ ):  $\delta$  161.8, 146.7, 143.3, 140.8, 132.1, 129.74, 129.7, 129.1, 126.0, 62.4, 32.9, 31.2, 22.7; HRMS (ESI)  $[\text{M}]^+$   $m/z$  calcd for  $[\text{C}_{15}\text{H}_{16}\text{N}]^+$  is 210.1277, found 210.1280.

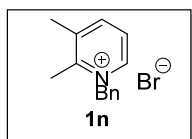

White crystalline solid, 2.76 g, 84% yield.  $^1\text{H}$  NMR (500 MHz,  $\text{CDCl}_3$ ):  $\delta$  9.49 (d,  $J = 6.2$  Hz, 1H), 8.22 (d,  $J = 7.7$  Hz, 1H), 7.82 (t,  $J = 6.8$  Hz, 1H), 7.30-7.26 (m, 3H), 7.25-7.23 (m, 2H), 6.24 (s, 2H), 2.75 (s, 3H), 2.45 (m, 3H);  $^{13}\text{C}$  NMR (125 MHz,  $\text{CDCl}_3$ ):  $\delta$  154.9, 146.1, 144.9, 139.01, 132.3, 129.5, 129.2, 127.9, 125.2, 62.4, 20.3, 18.0;

### General procedure for the asymmetric hydrogenation of pyridinium salts:

A high pressure steel autoclave (HEL 100 mL) hydrogenation reactor was taken into the glove box. Catalyst solution was prepared in a vial with  $[\text{Ir}(\text{COD})\text{Cl}]_2$  (1 mol%) and ligand (*S,S*)-MeO-BoQPhos (3 mol%), and stir for 15 min in THF (5 mL) (or use the 2 mol% of catalyst **3**), followed by addition of  $\text{I}_2$ . Pyridinium salt (0.5 g) was added to the reactor and THF (15 mL). The catalyst solution was then transferred to the reactor before taking out of the glove box. The mixture was purged with  $\text{N}_2$  and  $\text{H}_2$  and stirred at the desired pressure and temperature for 5–24 h. Upon completion, the reactor was vented and the samples were collected. Percentage conversions and enantiomeric ratios were determined by chiral HPLC and SFC and the products were purified by silica gel (100% hexanes to 30% EtOAc/hexanes).

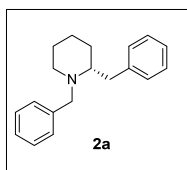

**1,2-dibenzylpiperidine 2a:**<sup>3</sup> 370.5 mg (1.39 mmol), 95% yield, 90:10 er, colorless liquid;  $[\alpha]_{\text{D}}^{20} = +2.0$  (c 0.05, EtOH);  $^1\text{H}$  NMR (500 MHz,  $\text{CDCl}_3$ ):  $\delta$  7.35 (m, 2H), 7.31 (m, 2H), 7.25 (m, 2H), 7.24 (m, 1H), 7.15 (m, 3H), 4.05 (d,  $J = 13.5$  Hz, 1H), 3.49 (d,  $J = 13.5$  Hz, 1H), 3.16 (d,  $J = 9.9$  Hz, 1H), 2.71 (m, 1H), 2.68-2.58 (m,

2H), 2.22 (m, 1H), 1.63 (m, 1H), 1.51 (m, 3H), 1.29 (m, 2H);  $^{13}\text{C}$  NMR (125 MHz,  $\text{CDCl}_3$ ):  $\delta$  140.5, 139.8, 129.4, 128.9, 128.3, 128.2, 126.8, 125.8, 61.8, 58.6, 50.9, 36.5, 29.4, 25.4, 22.5; Enantiomeric ratio was determined by HPLC: OJ-3R column (150 x 4.6 mm), A: MeCN; B: 0.1% AcOH, pH = 7.0 adjusted with  $\text{NH}_4\text{OH}$  in water; A/B = 60/40 flow rate 1.3 mL/min. HRMS (ESI)  $[\text{M}+\text{H}]^+$   $m/z$  calcd for  $[\text{C}_{19}\text{H}_{24}\text{N}]^+$  is 266.1903, found 266.1916.

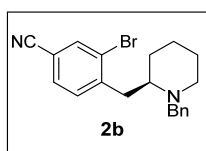

**4-((1-benzylpiperidin-2-yl)methyl)-3-bromobenzonitrile, 2b:** 382 mg (1.035 mmol), 92% yield, 93:7 er, light yellow solid; m.p 56.0-58.0 °C;  $[\alpha]_{\text{D}}^{20} = -2.8$  (c 0.05, EtOH);  $^1\text{H}$  NMR (500 MHz,  $\text{CDCl}_3$ ):  $\delta$  7.79 (m, 1H), 7.48 (m,

1H), 7.33-7.21 (m, 6H), 4.00 (d,  $J = 13.7$  Hz, 1H), 3.56 (d,  $J = 13.7$  Hz, 1H), 3.30 (d,  $J = 9.0$  Hz, 1H), 2.89 (m, 2H), 2.78 (m, 1H), 2.32 (m, 1H), 1.68 (m, 1H), 1.59-1.49 (m, 3H), 1.41-1.30 (m, 2H);  $^{13}\text{C}$  NMR (125 MHz,  $\text{CDCl}_3$ ):  $\delta$  146.3, 139.9, 136.2, 132.4, 130.7, 128.7, 128.4, 127.0, 125.3, 117.6, 111.6, 59.6, 58.7, 50.1, 36.4, 28.8, 25.1, 22.1; Enantiomeric ratio was determined by HPLC: Lux Amylose-2, (250 x 4.6 mm), particle size 3 $\mu\text{m}$ , A: Heptane; B: ethanol denatured (5% IPA and 5% MeOH), A/B = 35/65 flow rate 1.3 mL/min. HRMS (ESI)  $[\text{M}+\text{H}]^+$   $m/z$  calcd for  $[\text{C}_{20}\text{H}_{22}\text{BrN}_2]^+$  is 369.0968 found 369.0961.

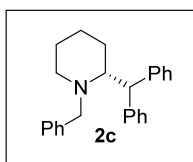

**2-benzhydryl-1-benzylpiperidine, 2c:** 377mg (1.10 mmol), 92% yield, 84:16 er, white solid; m.p 102.0-104.0 °C;  $[\alpha]_{\text{D}}^{20} = +21.6$  (c 0.05, EtOH);  $^1\text{H}$  NMR (500 MHz,  $\text{CDCl}_3$ ):  $\delta$  7.31(m, 4H), 7.27-7.21 (m, 4H), 7.19-7.11 (m, 5H), 6.82

(m, 2H), 4.31 (d,  $J = 11.3$  Hz, 1H), 3.71 (m, 2H), 3.52 (m, 1H), 2.86 (m, 1H), 2.47 (m, 1H), 1.78 (m, 1H), 1.56-1.33 (m, 6H);  $^{13}\text{C}$  NMR (125 MHz,  $\text{CDCl}_3$ ):  $\delta$  144.0, 143.7, 140.6, 128.9, 129.9, 128.7, 128.6, 128.2, 128.0, 126.6, 126.3, 126.0, 62.5, 53.9, 47.3, 23.1, 23.0, 19.8; Enantiomeric ratio was determined by SFC: Chiralpak OD-3, 4.6 mm x 150 mm, particle size: 3  $\mu\text{m}$ , temperature: 30 °C, A:  $\text{CO}_2$ , B: ethanol with 0.2% of isobutylamine, isocratic: A/B: 97/3, v/v,

flow rate 3.0 mL/min; HRMS (ESI)  $[M+H]^+$   $m/z$  calcd for  $[C_{55}H_{28}N]^+$  is 342.2143, found 342.2217.

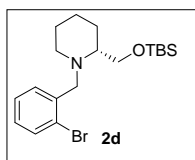

**1-benzyl-2-(((tert-butyldimethylsilyl)oxy)methyl)piperidine, 2d:** 379 mg (0.95 mmol), 90% yield, 82:18 er, colorless liquid;  $[\alpha]_D^{20} = +24.3$  (c 1.0, EtOH);  $^1H$  NMR (400 MHz,  $CDCl_3$ ):  $\delta$  7.58 (d,  $J = 7.6$  Hz, 1H), 7.49 (d,  $J =$

7.6 Hz, 1H), 7.26 (m, 1H), 7.06 (t,  $J = 7.6$  Hz, 1H), 4.13 (d,  $J = 15.5$  Hz, 1H), 3.83 (dd,  $J = 10.2$ , 5.2 Hz, 1H), 3.54 (dd,  $J = 10.2$ , 5.5 Hz, 1H), 3.48 (d,  $J = 15.4$  Hz, 1H), 2.74 (m, 1H), 2.51 (m, 1H), 2.17 (m, 1H), 1.77 (m, 1H), 1.67 (m, 1H), 1.57-1.31 (m, 4H), 0.88 (m, 9H), 0.02 (m, 6H);  $^{13}C$  NMR (100 MHz,  $CDCl_3$ ):  $\delta$  139.9, 132.6, 130.5, 127.9, 127.2, 124.2, 65.7, 63.3, 58.5, 52.4, 29.2, 26.1, 25.8, 23.4, 18.4; Enantiomeric ratio was determined by SFC: Chiralpak IC-3, 4.6 mm x 150 mm, particle size: 3  $\mu$ m, temperature: 30  $^\circ$ C, A:  $CO_2$ , B: ethanol with 0.2% of isobutylamine, isocratic: A/B: 99/1, v/v, flow rate 3.0 mL/min. HRMS (ESI)  $[M+H]^+$   $m/z$  calcd for  $[C_{19}H_{33}BrNOSi]^+$  is 398.1437, found 398.1507.

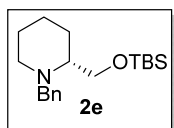

**1-benzyl-2-(((tert-butyldimethylsilyl)oxy)methyl)piperidine, 2e:** 376 mg (1.18 mmol), 93% yield, 84:16 er, colorless liquid;  $[\alpha]_D^{20} = +19.8$  (c 1.0, EtOH);  $^1H$

NMR (400 MHz,  $CDCl_3$ ):  $\delta$  7.31-7.21 (m, 4H), 7.19-7.14 (m, 1H), 4.07 (d,  $J = 13.7$  Hz, 1H), 3.86 (dd,  $J = 10.2$ , 4.8 Hz, 1H), 3.52 (dd,  $J = 10.2$ , 5.7 Hz, 1H), 3.25 (d,  $J = 13.7$  Hz, 1H), 2.69 (m, 1H), 2.35 (m, 1H), 1.97 (m, 1H), 1.73 (m, 1H), 1.63 (m, 1H), 1.49-1.19 (m, 4H), 0.85 (m, 9H), 0.004 (m, 6H);  $^{13}C$  NMR (100 MHz,  $CDCl_3$ ):  $\delta$  140.3, 129.0, 128.2, 126.7, 65.9, 63.2, 59.3, 29.3, 26.1, 25.7, 23.7, 18.5; Enantiomeric ratio was determined by SFC: Chiralpak IC-3, 4.6 mm x 150 mm, particle size: 3  $\mu$ m, temperature: 30  $^\circ$ C, A:  $CO_2$ , B: ethanol with 0.2% of isobutylamine, isocratic: A/B: 93/7, v/v, flow rate 3.0 mL/min. HRMS (ESI)  $[M+H]^+$   $m/z$  calcd for  $[C_{19}H_{34}NOSi]^+$  is 320.2421 found 320.2404.

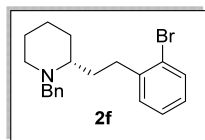

**1-benzyl-2-(2-bromophenethyl)piperidine, 2f:** 368 mg( 1.027 mmol), 89%

yield, 88:12 er, colorless liquid;  $[\alpha]_D^{20} = + 29.3$  (c 1.0, EtOH);  $^1\text{H NMR}$  (500 MHz,  $\text{CDCl}_3$ ):  $\delta$  7.59 (m, 1H), 7.44 (m, 2H), 7.38 (m, 2H), 7.31 (m, 3H), 7.11 (m, 1H), 4.13 (d,  $J = 14.0$  Hz, 1H), 3.37 (d,  $J = 14.0$  Hz, 1H), 2.97-2.91 (m, 1H), 2.88-2.81 (m, 2H), 2.52 (m, 1H), 2.16 (m, 1H), 1.97 (m, 2H), 1.82 (m, 2H), 1.68 (m, 1H), 1.58 (m, 2H), 1.45 (m, 1H);  $^{13}\text{C NMR}$  (125 MHz,  $\text{CDCl}_3$ ):  $\delta$  142.5, 140.0, 132.9, 130.5, 129.2, 129.0, 128.5, 128.3, 128.2, 127.64, 127.6, 126.8, 124.5, 60.3, 57.7, 51.5, 32.4, 32.1, 30.1, 27.1, 25.2, 23.6; Enantiomeric ratio was determined by SFC: Chiralpak OZ-3, 4.6 mm x 150 mm, particle size: 3  $\mu\text{m}$ , temperature: 30  $^\circ\text{C}$ , A:  $\text{CO}_2$ , B: ethanol with 0.2% of isobutylamine, isocratic: A/B: 77/23, v/v, flow rate 3.0 mL/min; HRMS (ESI)  $[\text{M}+\text{H}]^+$   $m/z$  calcd for  $[\text{C}_{20}\text{H}_{25}\text{BrN}]^+$  is 358.1167 found 358.1165.

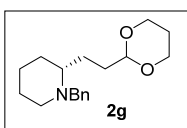

**2-(2-(1,3-dioxan-2-yl)ethyl)-1-benzylpiperidine, 2g,** 333.7 mg (1.15 mmol),

84% yield, 88:12 er, colorless liquid;  $[\alpha]_D^{20} = + 59.2$  (c 0.05, EtOH);  $^1\text{H NMR}$  (400 MHz,  $\text{CDCl}_3$ ):  $\delta$  7.58 (d,  $J = 7.6$  Hz, 1H), 7.49 (d,  $J = 7.6$  Hz, 1H), 7.26 (m, 1H), 7.06 (t,  $J = 7.6$  Hz, 1H), 4.13 (d,  $J = 15.5$  Hz, 1H), 3.83 (dd,  $J = 10.2, 5.2$  Hz, 1H), 3.54 (dd,  $J = 10.2, 5.5$  Hz, 1H), 3.48 (d,  $J = 15.4$  Hz, 1H), 2.74 (m, 1H), 2.51 (m, 1H), 2.17 (m, 1H), 1.77 (m, 1H), 1.67 (m, 1H), 1.57-1.31 (m, 4H), 0.88 (m, 9H). 0.02 (m, 6H);  $^{13}\text{C NMR}$  (100 MHz,  $\text{CDCl}_3$ ):  $\delta$  139.9, 132.6, 130.5, 127.9, 127.2, 124.2, 65.7, 63.3, 58.5, 52.4, 29.2, 26.1, 25.8, 23.4, 18.4; Enantiomeric ratio was determined by SFC: Chiralpak IC-3, 4.6 mm x 150 mm, particle size: 3  $\mu\text{m}$ , temperature: 30  $^\circ\text{C}$ , A:  $\text{CO}_2$ , B: ethanol with 0.2% of isobutylamine, isocratic: A/B: 97/3, v/v, flow rate 3.0 mL/min. HRMS (ESI)  $[\text{M}+\text{H}]^+$   $m/z$  calcd for  $[\text{C}_{18}\text{H}_{28}\text{NO}_2]^+$  is 290.2115, found 290.2124.

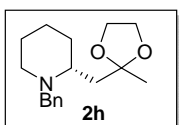

**1-benzyl-2-((2-methyl-1,3-dioxolan-2-yl)methyl)piperidine, 2h:** 271 mg (0.98 mmol), 69% yield, 83.5:16.5 er, colorless liquid.  $^1\text{H NMR}$  (400 MHz,  $\text{CDCl}_3$ ):  $\delta$

7.34 (m, 2H), 7.28 (m, 2H), 7.20 (m, 1H), 3.97-3.87 (m, 4H), 3.81 (d,  $J = 13.9$  Hz, 1H), 3.35 (d,  $J = 13.9$  Hz, 1H), 2.69 (m, 1H), 2.59 (m, 1H), 2.21 (m, 1H), 2.04 (m, 1H), 1.89-1.69 (m, 2H), 1.61-1.38 (m, 5H), 1.32 (s, 3H);  $^{13}\text{C}$  NMR (100 MHz,  $\text{CDCl}_3$ ):  $\delta$  140.4, 128.9, 128.2, 126.7, 110.3, 64.8, 64.5, 58.6, 56.3, 50.1, 38.6, 32.0, 25.2, 24.6, 22.2; Enantiomeric ratio was determined by SFC: Chiralpak IC-3, 4.6 mm x 150 mm, particle size: 3  $\mu\text{m}$ , temperature: 30  $^\circ\text{C}$ , A:  $\text{CO}_2$ , B: ethanol with 0.2% of isobutylamine, isocratic: A/B: 99/1, v/v, flow rate 3.0 mL/min. HRMS (ESI)  $[\text{M}+\text{H}]^+$   $m/z$  calcd for  $[\text{C}_{17}\text{H}_{26}\text{NO}_2]^+$  is 276.1885, found 276.1970.

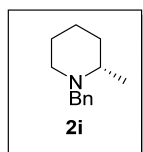

**1-benzyl-2-methylpiperidine, 2i<sup>3</sup>**: 315 mg (1.66 mmol), 88% yield, 82:18 er, colorless liquid;  $[\alpha]_{\text{D}}^{20} = +66.4$  (c 0.05, EtOH);  $^1\text{H}$  NMR (500 MHz,  $\text{CDCl}_3$ ):  $\delta$  7.35-7.30 (m, 4H), 7.24 (m, 1H), 4.02 (d,  $J = 13.6$  Hz, 1H), 3.21 (d,  $J = 13.6$  Hz, 1H), 2.78-2.72 (m, 1H), 2.33 (m, 1H), 1.97 (m, 1H), 1.66 (m, 2H), 1.51-1.44 (m, 2H), 1.42-1.26 (m, 2H), 1.19 (d,  $J = 13.6$  Hz, 3H);  $^{13}\text{C}$  NMR (125 MHz,  $\text{CDCl}_3$ ):  $\delta$  139.7, 129.3, 128.2, 126.7, 58.7, 56.6, 52.4, 34.9, 26.2, 24.2, 19.7; Enantiomeric ratio was determined by SFC: Chiralpak IC-3, 4.6 mm x 150 mm, particle size: 3  $\mu\text{m}$ , temperature: 30  $^\circ\text{C}$ , A:  $\text{CO}_2$ , B: ethanol with 0.2% of isobutylamine, isocratic: A/B: 99/1, v/v, flow rate 3.0 mL/min. HRMS (ESI)  $[\text{M}+\text{H}]^+$   $m/z$  calcd for  $[\text{C}_{13}\text{H}_{20}\text{N}]^+$  is 190.1587 found 190.1590.

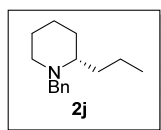

**1-benzyl-2-cyclopropylpiperidine, 2j**: 335 mg (1.54 mmol), 90% yield, 88:12 er, colorless liquid;  $[\alpha]_{\text{D}}^{20} = +57.0$  (c 0.05, EtOH);  $^1\text{H}$  NMR (400 MHz,  $\text{CDCl}_3$ ):  $\delta$  7.26-7.19 (m, 4H), 7.16 (m, 1H), 3.89 (d,  $J = 13.2$  Hz, 1H), 3.16 (d,  $J = 13.2$  Hz, 1H), 2.66 (m, 1H), 2.22 (t,  $J = 8.1$  Hz, 1H), 1.96 (m, 1H), 1.61-1.50 (m, 2H), 1.47-1.30 (m, 5H), 1.28-1.17 (m, 2H), 0.83 (t,  $J = 7.3$  Hz, 3H);  $^{13}\text{C}$  NMR (100 MHz,  $\text{CDCl}_3$ ):  $\delta$  139.9, 129.1, 128.3, 126.8, 60.8, 57.6, 51.8, 34.2, 30.4, 25.3, 23.8, 19.0, 14.8; Enantiomeric ratio was determined by GC-MS: Chiral Dex B-PH, 30 m, 0.25 mm, 0.12  $\mu\text{m}$ , oven temp: hold 110  $^\circ\text{C}$  for 80 min, split ratio:

100:1, flow rate 1.0 mL/min. HRMS (ESI)  $[M+H]^+$   $m/z$  calcd for  $[C_{15}H_{24}N]^+$  is 218.1903, found 218.1922.

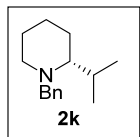

**1-benzyl-2-isopropylpiperidine, 2k:** 346 mg (1.59 mmol), 93% yield, 91:9 er, colorless liquid;  $[\alpha]_D^{20} = +71.6$  (c 0.05, EtOH);  $^1H$  NMR (500 MHz,  $CDCl_3$ ):  $\delta$  7.07 (d,  $J = 7.3$  Hz, 1H), 6.91 (d,  $J = 7.4$  Hz, 1H), 6.54 (s, 1H), 3.57 (m, 1H), 3.35 (m, 1H), 3.02 (dd,  $J = 15.6, 7.6$  Hz, 1H), 2.71 (m, 1H), 2.60 (dd,  $J = 15.6, 9.7$  Hz, 1H), 1.86 (m, 2H), 1.72 (m, 1H), 1.61-1.36 (m, 3H);  $^{13}C$  NMR (125 MHz,  $CDCl_3$ ):  $\delta$  140.5, 129.0, 128.2, 126.7, 66.7, 56.7, 52.8, 27.7, 29.9, 24.8, 23.7, 20.4, 16.2; Enantiomeric ratio was determined by SFC: Chiralpak OZ-3, 4.6 mm x 150 mm, Particle size: 3  $\mu$ m, temperature: 30  $^\circ$ C, A:  $CO_2$ , B: ethanol with 0.2% of isobutylamine, isocratic: A/B: 70/30, v/v, flow rate 3.0 mL/min; HRMS (ESI)  $[M+H]^+$   $m/z$  calcd for  $[C_{15}H_{24}N]^+$  is 218.1903, found 218.1906.

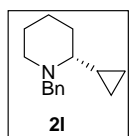

**1-benzyl-2-cyclopropylpiperidine, 2l:** 304 mg (1.41 mmol), 82% yield, 92:8 er, colorless liquid;  $[\alpha]_D^{20} = +49.6$  (c 0.05, EtOH);  $^1H$  NMR (400 MHz,  $CDCl_3$ ):  $\delta$  7.36 (m, 2H), 7.29 (m, 2H), 7.21 (m, 1H), 4.65 (d,  $J = 13.2$  Hz, 1H), 2.97 (d,  $J = 13.2$  Hz, 1H), 2.76 (m, 1H), 1.81 (m, 1H), 1.63-1.37 (m, 3H), 1.31-1.19 (m, 1H), 0.89-0.75 (m, 1H), 0.68-0.62 (m, 1H), 0.50-0.43 (m, 1H), 0.32-0.26 (m, 1H), 0.07-0.02 (m, 1H);  $^{13}C$  NMR (100 MHz,  $CDCl_3$ ):  $\delta$  140.9, 129.1, 128.2, 126.6, 68.4, 59.2, 52.7, 32.8, 25.9, 24.6, 15.4, 8.0, 1.6; Enantiomeric ratio was determined by SFC: Chiralpak OZ-3, 4.6 mm x 150 mm, particle size: 3  $\mu$ m, temperature: 30  $^\circ$ C, A:  $CO_2$ , B: ethanol with 0.2% of isobutylamine, isocratic: A/B: 70/30, v/v, flow rate 3.0 mL/min; HRMS (ESI)  $[M+H]^+$   $m/z$  calcd for  $[C_{15}H_{22}N]^+$  is 216.1747, found 216.1749.

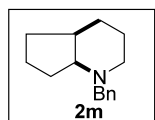

**cis-1-Benzyl-2,3,4,5,6,7,8-octahydro-1H-cyclopenta[b]pyridine, 2m:** 319 mg (1.48 mmol), 86% yield, 81:19 er, colorless liquid;  $[\alpha]_D^{20} = +41.6$  (c 0.05, EtOH);  $^1H$  NMR (500 MHz,  $CDCl_3$ ):  $\delta$  7.36-7.27 (m, 4H), 7.23 (m, 1H), 3.77 (d,  $J = 13.5$  Hz, 1H), 3.29 (d,  $J = 13.5$



Hz, 1H), 2.79 (m, 1H), 2.56 (m, 1H), 2.14 (m, 1H), 1.98 (m, 1H), 1.87 (m, 2H), 1.65-1.49 (m, 6H), 1.46-1.39 (m, 2H);  $^{13}\text{C}$  NMR (125 MHz,  $\text{CDCl}_3$ ):  $\delta$  140.0, 129.0, 128.2, 126.7, 64.1, 59.8, 49.9, 39.2, 28.3, 26.0, 23.2, 21.7; Enantiomeric ratio was determined by SFC: Chiralpak IC-3, 4.6 mm x 150 mm, particle size: 3  $\mu\text{m}$ , temperature: 30  $^\circ\text{C}$ , A:  $\text{CO}_2$ , B: ethanol with 0.2% of isobutylamine, isocratic: A/B: 95/5, v/v, flow rate 3.0 mL/min; HRMS (ESI)  $[\text{M}+\text{H}]^+$   $m/z$  calcd for  $[\text{C}_{15}\text{H}_{22}\text{N}]^+$  is 216.1674, found 216.1747.

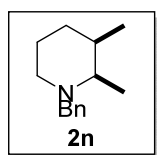

**cis-1-Benzyl-2,3-dimethylpiperidine, 2n:** 299.7 mg (1.47 mmol), 82% yield,

78:22 er, colorless liquid.  $^1\text{H}$  NMR (400 MHz,  $\text{CDCl}_3$ ):  $\delta$  7.37 (m, 2H), 7.31 (m, 2H), 7.23 (m, 1H), 3.66 (d,  $J = 7.7$  Hz, 1H), 3.54 (d,  $J = 7.7$  Hz, 1H), 2.78 (m,

1H), 2.47 (m, 1H), 2.34 (m, 1H), 1.91 (m, 1H), 1.56 (m, 2H), 1.46 (m, 1H), 1.29 (m, 1H), 0.91 (d,  $J = 6.5$  Hz, 3H), 0.87 (d,  $J = 7.0$  Hz, 3H);  $^{13}\text{C}$  NMR (100 MHz,  $\text{CDCl}_3$ ): 140.5, 128.7, 128.2, 126.7, 59.3, 57.9, 46.8, 35.1, 28.1, 25.9, 18.1, 6.7; Enantiomeric ratio was determined by SFC: Lux Cellulose-4, 4.6 mm x 150 mm, particle size: 3  $\mu\text{m}$ , temperature: 40  $^\circ\text{C}$ , A:  $\text{CO}_2$ , B: Methanol with 0.2% of isobutylamine, isocratic: A/B: 95/5, v/v, flow rate 3.0 mL/min; HRMS (ESI)  $[\text{M}+\text{H}]^+$   $m/z$  calcd for  $[\text{C}_{14}\text{H}_{22}\text{N}]^+$  is 204.1747 found 204.1755.

### Synthesis of 6,7,8,9,9a,10-hexahydropyrido[1,2-a]indole-3-carbonitrile (*R*)-5

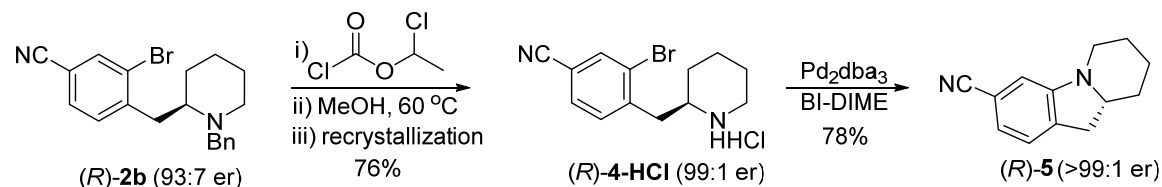

To a 100 mL 2-necked round-bottom flask was added **2b** (1.5 g, 4.06 mmol) and dry toluene (5 mL) and dry acetonitrile (5 mL). The mixture was heated to 60  $^\circ\text{C}$ , a clear solution was obtained. To this solution added *N,N*-diisopropylethylamine (104 mg, 0.812 mmol) followed by 1-

chloroethylchloroformate (0.75 g, 5.28 mmol) slowly over 5 min. Reaction was kept at this temperature for 2 h and monitored by LC-MS, complete conv to the amide intermediate was observed. The solvent mixture was concentrated on rotavap to remove the solvent. Then MeOH (10 mL) was added and the resulting reaction mixture was heated to 50 °C for 90 min, complete conversion to the deprotected amine **4** was observed. The mixture was cooled to rt to observe the formation of the HCl salt of **4**. The slurry was concentrated to remove MeOH. Then toluene (20 mL) was added to the crude and stir and filtered. The resulting solid was dissolved in EtOAc (10 mL) at 60 °C, and then MTBE (20 mL) was added slowly to observe formation of brown crystals. The mixture was cooled down to rt over 1 h. The crystals were filtered and washed with EtOAc/MTBE(1:3). Light brown crystalline **4-HCl** was obtained after dryness, 0.97 g, 76% yield, 99:1 er; <sup>1</sup>H NMR (400 MHz, CDCl<sub>3</sub>): δ 7.84 (d, *J* = 1.5 Hz, 1H), 7.52 (dd, *J* = 7.8, 1.5 Hz, 1H), 7.34 (d, *J* = 7.9 Hz, 1H), 3.71 (m, 1H), 3.52 (m, 1H), 3.33 (m, 2H), 2.90 (m, 1H), 2.00 (m, 1H), 1.85 (m, 1H), 1.68 (m, 1H), 1.53 (m, 1H), 1.37 (m, 1H); <sup>13</sup>C NMR (100 MHz, CDCl<sub>3</sub>): δ 144.9, 136.7, 132.1, 130.9, 125.4, 117.5, 112.0, 56.3, 47.3, 43.4, 33.0, 26.4, 24.8; Enantiomeric ratio was determined by SFC: Chiralpak OZ-3, 4.6 mm x 150 mm, particle size: 3 μm, temperature: 30 °C, A: CO<sub>2</sub>, B: ethanol with 0.2% of isobutylamine, isocratic: A/B: 88/12, v/v, flow rate 3.0 mL/min; HRMS (ESI) [M+H]<sup>+</sup> *m/z* calcd for [C<sub>13</sub>H<sub>16</sub>BrN<sub>2</sub>]<sup>+</sup> is 279.0419 found 279.0491.

A 20 mL Easymax vial equipped with a magnetic stir bar was charged with amine **4-HCl** (300 mg, 1.075 mmol), *rac*-BIDIME (5 mol%), Pd<sub>2</sub>(dba)<sub>3</sub> (2.5 mol%) and sodium *t*-butoxide (309 mg, 3.22 mmol) in 5 mL of degassed toluene. Reaction was kept at 110 °C under argon for 14 h. The crude mixture was filtered through a pad of celite and the filtrate was concentrated. The crude mixture was extracted with DCM (20 mL) and washed with sat NaHCO<sub>3</sub> (5 mL). The organic

layer was concentrated and purified using 30% EtOAc/hexanes to get (*R*)-**5** as reddish brown oil, 147 mg, 78% yield, 99.2:0.8 er;  $^1\text{H}$  NMR (500 MHz,  $\text{CDCl}_3$ ):  $\delta$  7.07 (d,  $J = 7.3$  Hz, 1H), 6.91 (d,  $J = 7.4$  Hz, 1H), 6.54 (s, 1H), 3.57 (m, 1H), 3.35 (m, 1H), 3.02 (dd,  $J = 15.6, 7.6$  Hz, 1H), 2.71 (m, 1H), 2.60 (dd,  $J = 15.6, 9.7$  Hz, 1H), 1.86 (m, 2H), 1.72 (m, 1H), 1.61-1.36 (m, 3H);  $^{13}\text{C}$  NMR (125 MHz,  $\text{CDCl}_3$ ):  $\delta$  151.7, 135.4, 125.0, 122.5, 120.2, 110.9, 108.0, 44.9, 35.7, 30.8, 24.4, 24.2; Enantiomeric excess was determined by SFC: Chiralpak OZ-3, 4.6 mm x 150 mm, particle size: 3  $\mu\text{m}$ , temperature: 30  $^\circ\text{C}$ , A:  $\text{CO}_2$ , B: Ethanol with 0.2% of isobutylamine, isocratic: A/B: 95/5, v/v, flow rate 3.0 mL/min; HRMS (ESI)  $[\text{M}+\text{H}]^+$   $m/z$  calcd for  $[\text{C}_{13}\text{H}_{15}\text{N}_2]^+$  is 199.1157 found 199.1237.

### Synthesis of (*R*)-6,6a,7,8,9,10-hexahydro-12H-benzo[*f*]pyrido[2,1-*c*][1,4]oxazepine (*R*)-**6**

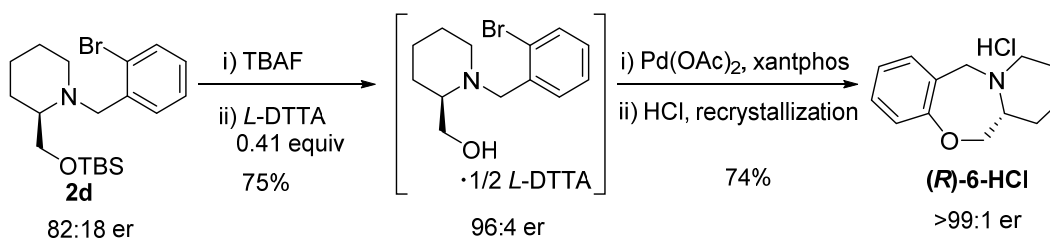

To a 100 mL round bottom flask was added **2d** (1.0 g, 2.5 mmol) and THF (10 mL), and cooled down to 0  $^\circ\text{C}$  with an ice bath. To this solution was added TBAF (1.343 mL 1.0 M in THF, 1.34 mmol), and the reaction mixture was stirred at 0  $^\circ\text{C}$  for 2 h. LC-MS indicates the disappearance of SM and formation of the alcohol. The mixture was concentrated and passed through a short silica pad and eluted with 50% EtOAc/hexane. The eluent was concentrated to obtain the alcohol as colorless liquid after concentration. The liquid was dissolved in EtOAc (6 mL) in a 50 mL round bottom flask and the solution was heated to 60  $^\circ\text{C}$ . To this solution added di-*p*-toluoyl-*L*-tartaric acid (*L*-DTTA) (398 mg, 0.41 equiv) in EtOAc (5 mL) added slowly and kept the solution at 60  $^\circ\text{C}$  for 1 h and cooled down to rt over 1 h and stirred for 14 h. The resulting solid

was filtered and washed with 10% IPA/heptane and dried. The piperidine 1/2 *L*-DBTA salt was collected as a white solid, 898 mg, 96:4 er (from NMR analysis). The solid was transferred to a 100 mL round bottom flask. 10% NaOH (10 mL) and toluene (25 mL) were added. The mixture was stirred at room temperature for 5 h. Organic layer was extracted and dried and concentrated to oily liquid and was used directly for the next step.

The liquid was dissolved in 1,4-dioxane (5 mL) and transferred to a 20 mL Easymax vial equipped with a magnetic stir bar and cesium carbonate (1.23 g, 2 equiv). The mixture was sparged with argon for 5 min. Then Pd<sub>2</sub>(dba)<sub>3</sub> (43 mg, 2.5 mol%) and xantphos (54.5 mg, 5 mol%) were added to the vial. The mixture was heated to 110 °C and stirred at this temperature for 14 h to observe complete conversion. The reaction was cooled down and the crude was filtered through a short pad of celite and the filtrate was concentrated. The crude mixture was extracted with DCM (20 mL) and washed with sat NaHCO<sub>3</sub> (5 mL). The organic layer was dried and dissolved in 2 mL of THF. To this solution was added 1.0 M HCl (470 uL of 4.0 M in dioxane). The salt was filtered after stirring at rt for 3 h. The salt was then dissolved in EtOAc at 60 °C and hexane was added slowly to observe the formation of the crystalline compound. The slurry was cooled down and filtered and washed with EtOAc/hexanes (1:4) to get a light brown crystalline product (*R*)-**6**-HCl, 334 mg, 74% yield, 99.0:1.0 er; <sup>1</sup>H NMR (500 MHz, CDCl<sub>3</sub>): δ 7.16 (m, 2H), 6.98 (m, 2H), 4.13 (d, *J* = 12.1 Hz, 1H), 3.78 (d, *J* = 13.6 Hz, 1H), 3.59 (m, 1H), 3.48 (d, *J* = 13.6 Hz, 1H), 2.97 (m, 1H), 2.51 (t, *J* = 9.5 Hz, 1H), 2.31 (m, 1H), 1.72-1.60 (m, 4H), 1.37-1.15 (m, 2H); <sup>13</sup>C NMR (125 MHz, CDCl<sub>3</sub>): δ 160.3, 132.0, 130.9, 128.7, 123.7, 120.1, 65.9, 62.1, 56.4, 28.4, 26.2, 23.4; Enantiomeric ratio was determined by SFC: Chiralpak OZ-3, 4.6 mm x 150 mm, particle size: 3 μm, temperature: 30 °C, A: CO<sub>2</sub>, B: ethanol with 0.2%

of isobutylamine, isocratic: A/B: 97/3, v/v, flow rate 3.0 mL/min; HRMS (ESI)  $[M+H]^+$   $m/z$  calcd for  $[C_{13}H_{17}NO]^+$  is 204.1310 found 204.1379.

### Synthesis of 2,3,4,4a,5,6-hexahydro-1H-pyrido[1,2-a]quinolone (**R**)-7

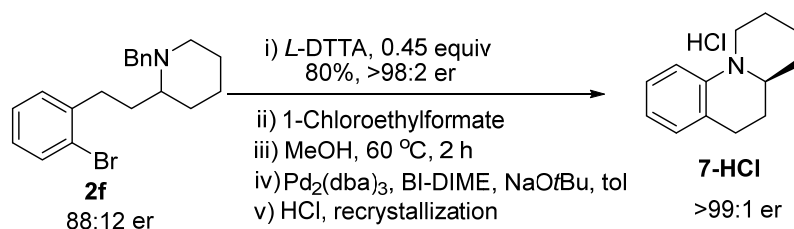

To a 100 mL round bottom flask was added **2f** (1.0 g, 2.78 mmol) and EtOAc (10 mL). The solution was heated to 60 °C. To this solution was added di-*p*-toluoyl-*L*-tartaric acid (*L*-DTTA) (858 mg 42.9 mg, 1.24 mmol, 0.45 equiv) in EtOAc (10 mL) slowly and the solution was kept at 60 °C for 1 h and then cool down to rt over 1 h and stirred for 14 h to observe formation of white solid. The solid was washed with 10% IPA/heptane and dried to yield the white solid of benzyl protected amine 1/2 *L*-DTTA salt, 1.23 g (2.233 mmol, 98:2 er). The resulting salt was added to a 100 mL round bottom flask and followed by toluene (25 mL) and saturated NaOH (10 mL). The mixture was stirred at rt for 5 h. The organic layer was extracted and dried to obtain colorless liquid, which was directly used for the next step.

The liquid was added to a 100 mL round bottom flask, followed by dry toluene (2.5 mL). To this solution was added dry acetonitrile (2.5 mL). The mixture was heated to 60 °C, a clear solution was obtained. To this solution was added *N,N*-Diisopropylethylamine (61 mg, 0.445 mmol) followed by 1-chloroethyl chloro formate (414 mg, 2.90 mmol) added slowly over 5 min. Reaction was kept at this temperature for 2 h and monitored by LC-MS, complete conversion to the amide was observed. The solvent mixture was concentrated and MeOH (15 mL) was added. The mixture was heated to 50 °C for 1 h to observe 100% conversion to the deprotected amine.

The solution was cooled to rt and concentrate. Toluene (35 mL) was added to crude mixture, brown solid was obtained. The slurry was cooled to rt and filtered and dried to give the crude amine HCl salt 585 mg (1.92 mmol). The salt was added to a 50 mL round bottom flask under argon, followed by 10 ml of degassed toluene. Then Pd<sub>2</sub>(dba)<sub>3</sub> (44.0 mg, 2.5 mol%) and *rac*-BIDIME (31.5 mg, 5 mol%), and sodium *t*-butoxide (553 mg, 3 equiv) were added. Reaction was heated to 110 °C and stirred at this temperature for 14 h. Complete cyclization was resulted. The crude mixture was filtered through celite pad and the filtrate was concentrated. The crude mixture was washed with water (20 mL) and extracted with DCM (20 mL). The organic layer was dried and dissolved in THF (8 mL). To this solution was added HCl (480 uL 4.0 M in dioxane) slowly at rt and stir for 3 h. The salt was then filtered and dissolved in EtOAc (10 mL) at 60 °C. To the solution was added hexane to observe the formation of crystalline product. The slurry was cooled down to rt over 1 h, filtered and dried to yield reddish brown solid of (**R**)-**7**, 272 mg, total yield 52% yield starting from **2f**, 99.2:0.8 er; <sup>1</sup>H NMR (500 MHz, CDCl<sub>3</sub>): δ 7.82 (br s, 1H), 7.28-7.34 (m, 2H), 7.22-7.24 (m, 1H), 3.87 (m, 1H), 3.56 (m, 1H), 3.32 (m, 1H), 3.00-3.03 (m, 2H), 2.46-2.74 (m, 3H), 1.65-2.05 (m, 5H); <sup>13</sup>C NMR (100 MHz, CDCl<sub>3</sub>): δ 137.6, 130.4, 129.2, 127.9, 124.1, 55.9, 54.5, 27.3, 25.2, 22.9, 20.3, 17.1; Enantiomeric excess was determined by SFC: Chiralpak OD-3, 4.6 mm x 150 mm, particle size: 3 μm, temperature: 30 °C, A: CO<sub>2</sub>, B: ethanol with 0.2% of isobutylamine, isocratic: A/B: 95/5, v/v, flow rate 3.0 mL/min. HRMS (ESI) [M+H]<sup>+</sup> *m/z* calcd for [C<sub>13</sub>H<sub>18</sub>N]<sup>+</sup> is 188.1361 found 188.1429.

## References:

1. J. N. Desrosiers, X. Wei, O. Gutierrez, J. Savoie, B. Qu, X. Zeng, H. Lee, N. Grinberg, N. Haddad, N. K. Yee, F. Roschangar, J. J. Song, M. C. Kozlowski, C. H. Senanayake, *Chem. Sci.* **2016**, *7*, 5581.
2. C. Shu, K. Sidhu, L. Zhang, X-J. Wang, D. Krishnamurthy, C.H. Senanayake, *J. Org. Chem.* **2010**, *75*, 6677.
3. M. Chang, Y. Huang, S. Liu, Y. Chen, S. W. Krska, I. W. Davies, X. Zhang, *Angew. Chem., Int. Ed.* **2014**, *53*, 12761.

**Table 1. Crystal data and structure refinement for complex 3.**

|                                             |                                                               |
|---------------------------------------------|---------------------------------------------------------------|
| Identification code                         | IrCl(MeO-BoQPhos)(COD)                                        |
| Empirical formula                           | C <sub>26</sub> H <sub>34</sub> ClIrNO <sub>3</sub> P         |
| Formula weight                              | 667.16                                                        |
| Temperature/K                               | 99.59                                                         |
| Crystal system                              | orthorhombic                                                  |
| Space group                                 | P2 <sub>1</sub> 2 <sub>1</sub> 2 <sub>1</sub>                 |
| a/Å                                         | 10.8573(4)                                                    |
| b/Å                                         | 14.3398(6)                                                    |
| c/Å                                         | 16.3961(7)                                                    |
| α/°                                         | 90                                                            |
| β/°                                         | 90                                                            |
| γ/°                                         | 90                                                            |
| Volume/Å <sup>3</sup>                       | 2552.73(18)                                                   |
| Z                                           | 4                                                             |
| ρ <sub>calc</sub> /g/cm <sup>3</sup>        | 1.736                                                         |
| μ/mm <sup>-1</sup>                          | 11.903                                                        |
| F(000)                                      | 1320.0                                                        |
| Crystal size/mm <sup>3</sup>                | 0.06 × 0.04 × 0.01                                            |
| Radiation                                   | CuKα (λ = 1.54178)                                            |
| 2θ range for data collection/°              | 8.19 to 132.934                                               |
| Index ranges                                | -12 ≤ h ≤ 12, -12 ≤ k ≤ 16, -19 ≤ l ≤ 19                      |
| Reflections collected                       | 12048                                                         |
| Independent reflections                     | 3958 [R <sub>int</sub> = 0.0451, R <sub>sigma</sub> = 0.0514] |
| Data/restraints/parameters                  | 3958/324/303                                                  |
| Goodness-of-fit on F <sup>2</sup>           | 0.976                                                         |
| Final R indexes [I ≥ 2σ (I)]                | R <sub>1</sub> = 0.0252, wR <sub>2</sub> = 0.0512             |
| Final R indexes [all data]                  | R <sub>1</sub> = 0.0273, wR <sub>2</sub> = 0.0519             |
| Largest diff. peak/hole / e Å <sup>-3</sup> | 0.55/-0.52                                                    |
| Flack parameter                             | 0.002(9)                                                      |

**Table 2. Crystal data and structure refinement for 7-HCl.**

|                                             |                                                               |
|---------------------------------------------|---------------------------------------------------------------|
| Identification code                         | 7-HCl                                                         |
| Empirical formula                           | C <sub>13</sub> H <sub>18</sub> ClN                           |
| Formula weight                              | 223.73                                                        |
| Temperature/K                               | 100.01                                                        |
| Crystal system                              | monoclinic                                                    |
| Space group                                 | P2 <sub>1</sub>                                               |
| a/Å                                         | 8.9435(6)                                                     |
| b/Å                                         | 7.0058(5)                                                     |
| c/Å                                         | 9.7900(6)                                                     |
| α/°                                         | 90                                                            |
| β/°                                         | 108.318(4)                                                    |
| γ/°                                         | 90                                                            |
| Volume/Å <sup>3</sup>                       | 582.32(7)                                                     |
| Z                                           | 2                                                             |
| ρ <sub>calc</sub> /g/cm <sup>3</sup>        | 1.276                                                         |
| μ/mm <sup>-1</sup>                          | 2.608                                                         |
| F(000)                                      | 240.0                                                         |
| Crystal size/mm <sup>3</sup>                | 0.12 × 0.06 × 0.03                                            |
| Radiation                                   | CuKα (λ = 1.54178)                                            |
| 2θ range for data collection/°              | 9.516 to 132.892                                              |
| Index ranges                                | -10 ≤ h ≤ 10, -7 ≤ k ≤ 7, -11 ≤ l ≤ 11                        |
| Reflections collected                       | 2759                                                          |
| Independent reflections                     | 1678 [R <sub>int</sub> = 0.0216, R <sub>sigma</sub> = 0.0421] |
| Data/restraints/parameters                  | 1678/1/136                                                    |
| Goodness-of-fit on F <sup>2</sup>           | 1.027                                                         |
| Final R indexes [I ≥ 2σ (I)]                | R <sub>1</sub> = 0.0299, wR <sub>2</sub> = 0.0713             |
| Final R indexes [all data]                  | R <sub>1</sub> = 0.0315, wR <sub>2</sub> = 0.0723             |
| Largest diff. peak/hole / e Å <sup>-3</sup> | 0.21/-0.25                                                    |
| Flack parameter                             | 0.074(15)                                                     |



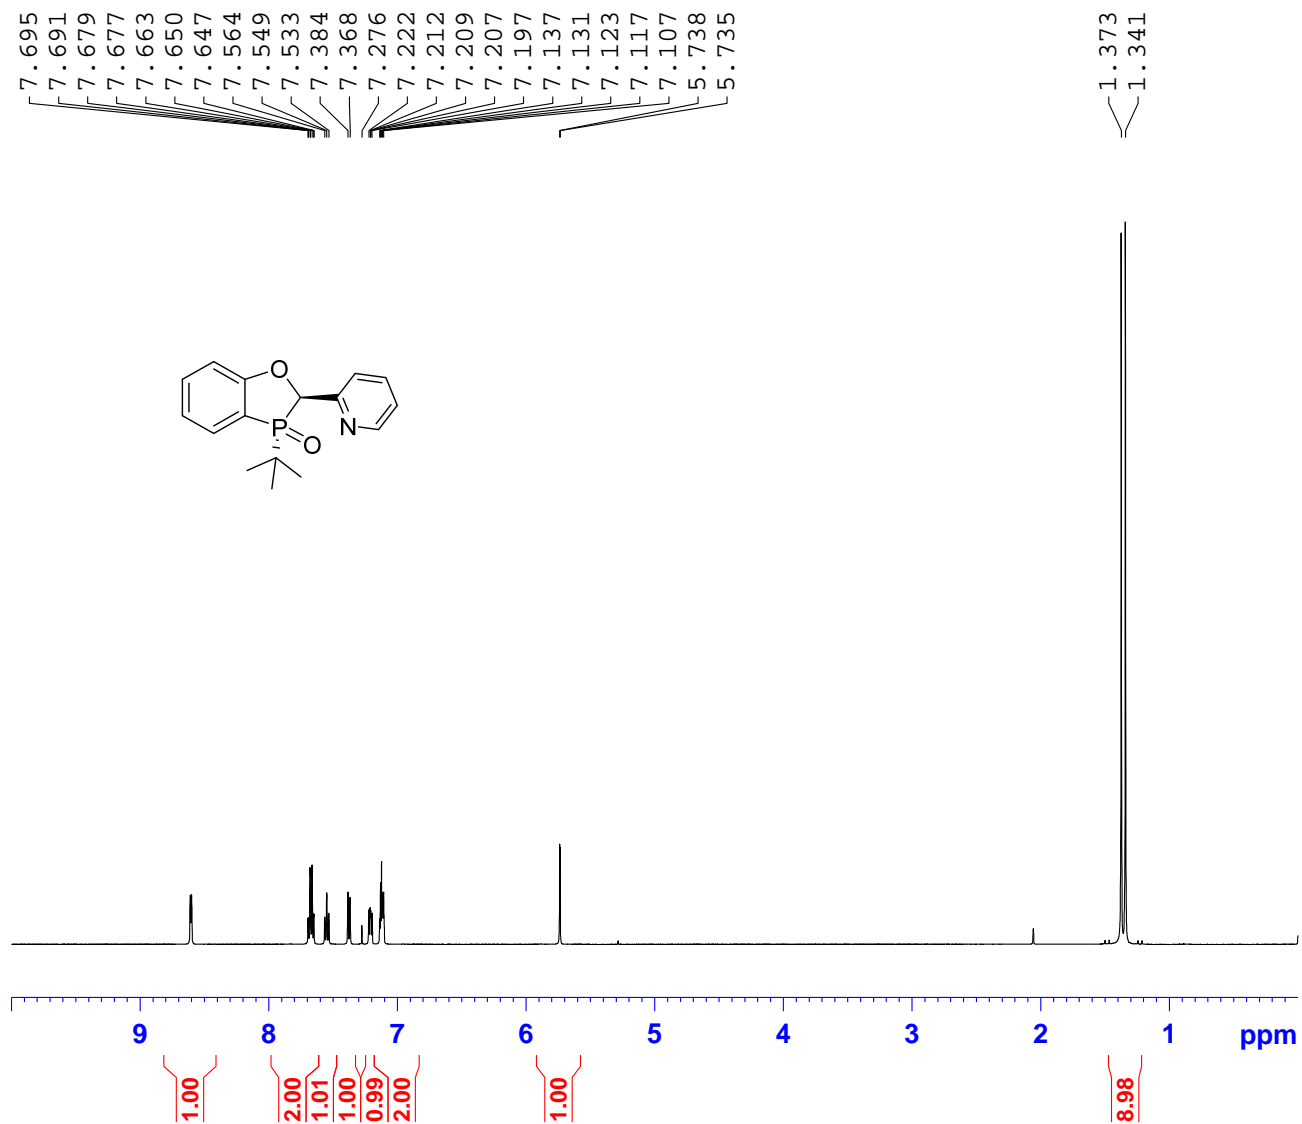

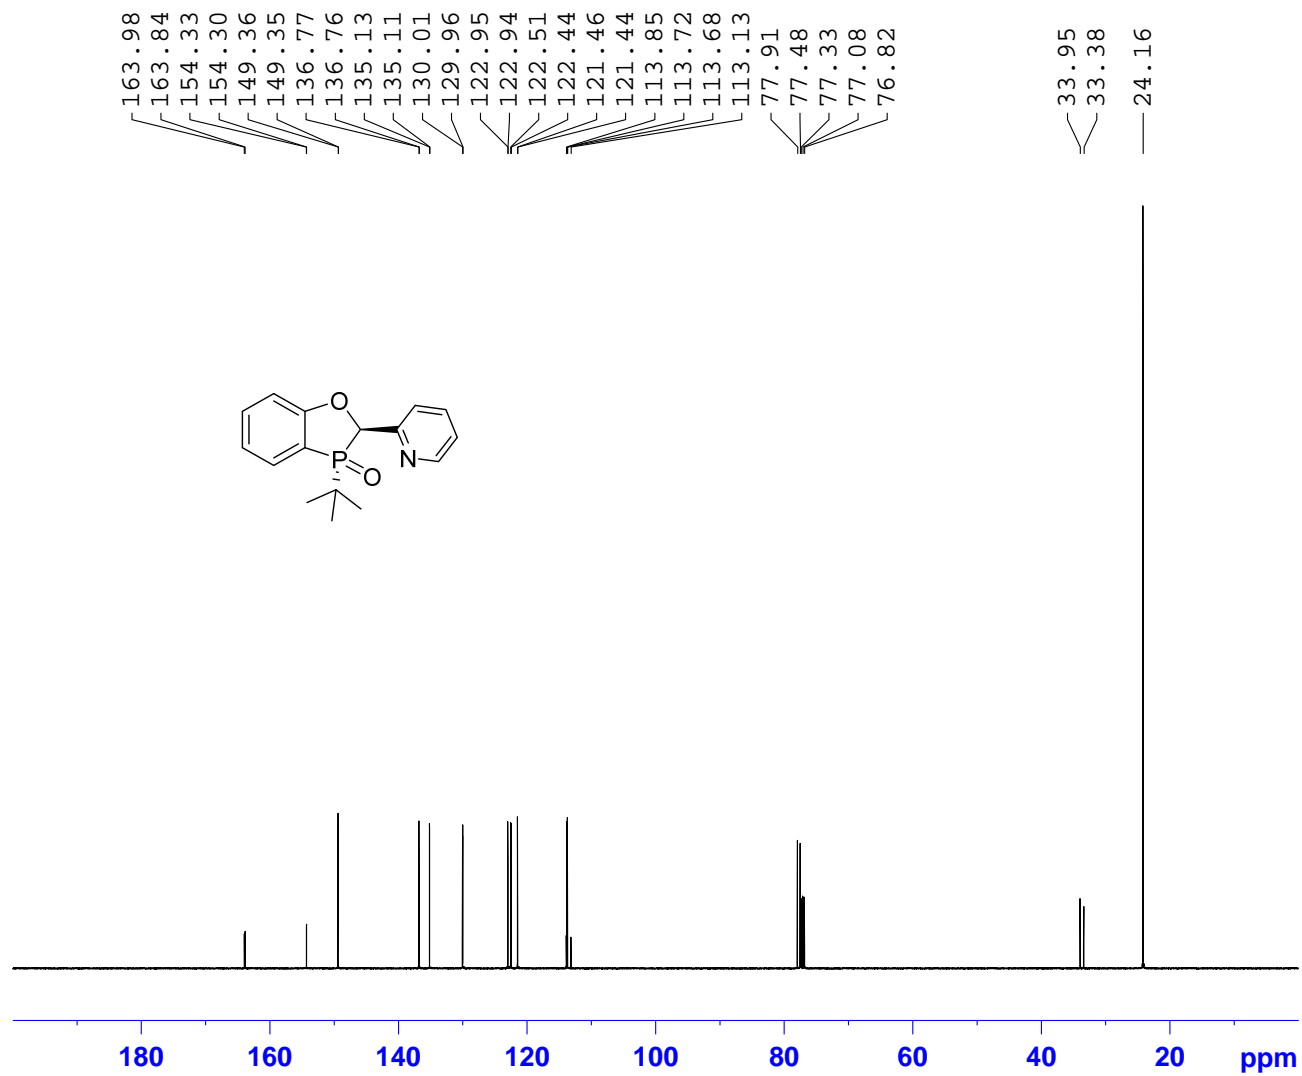

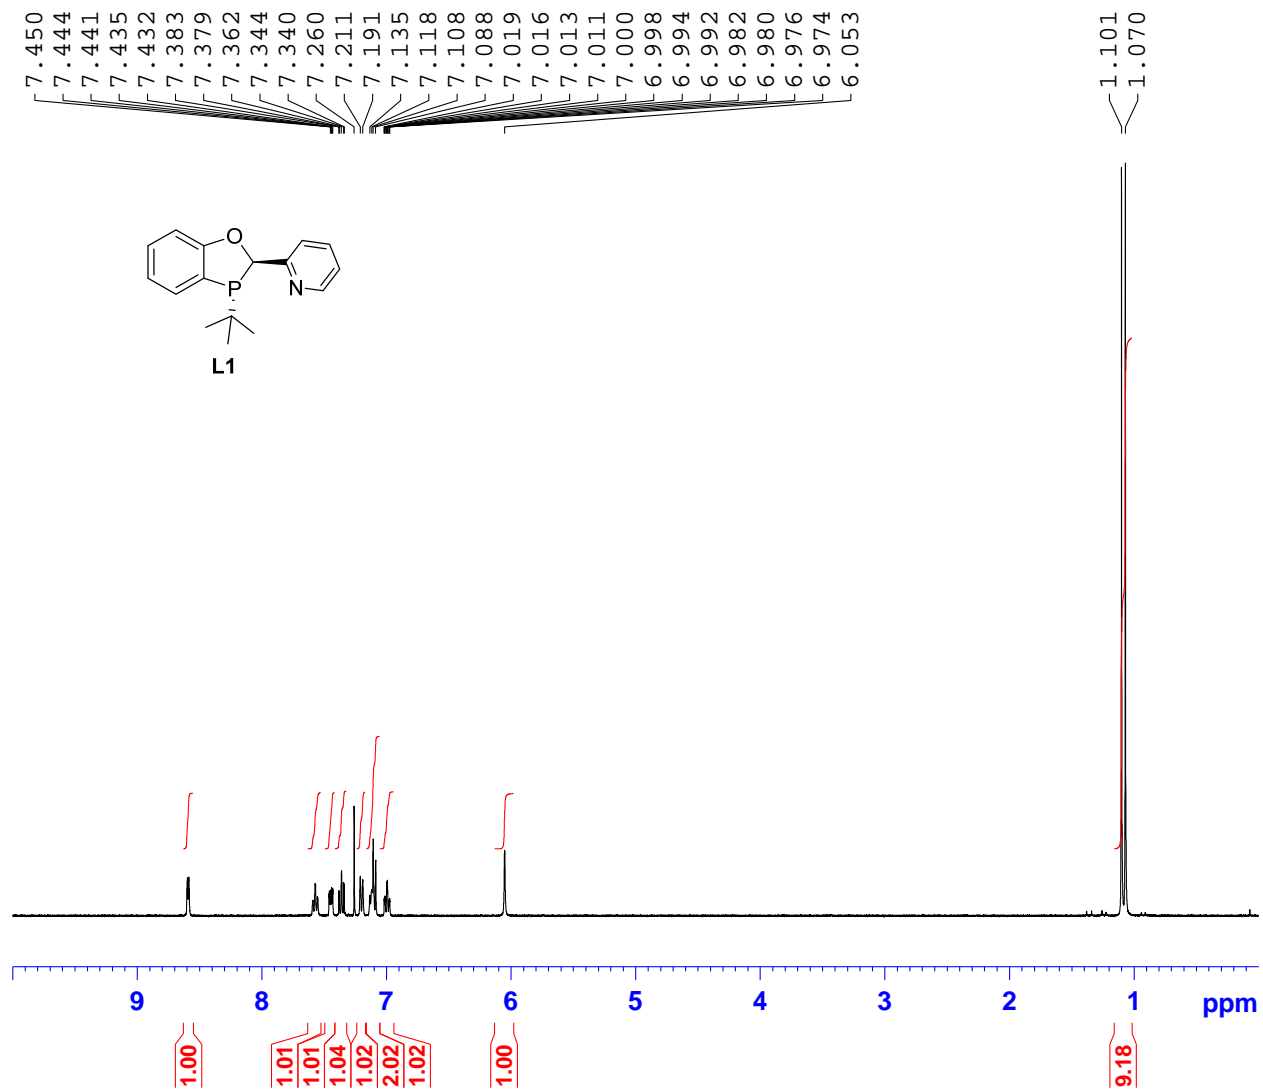

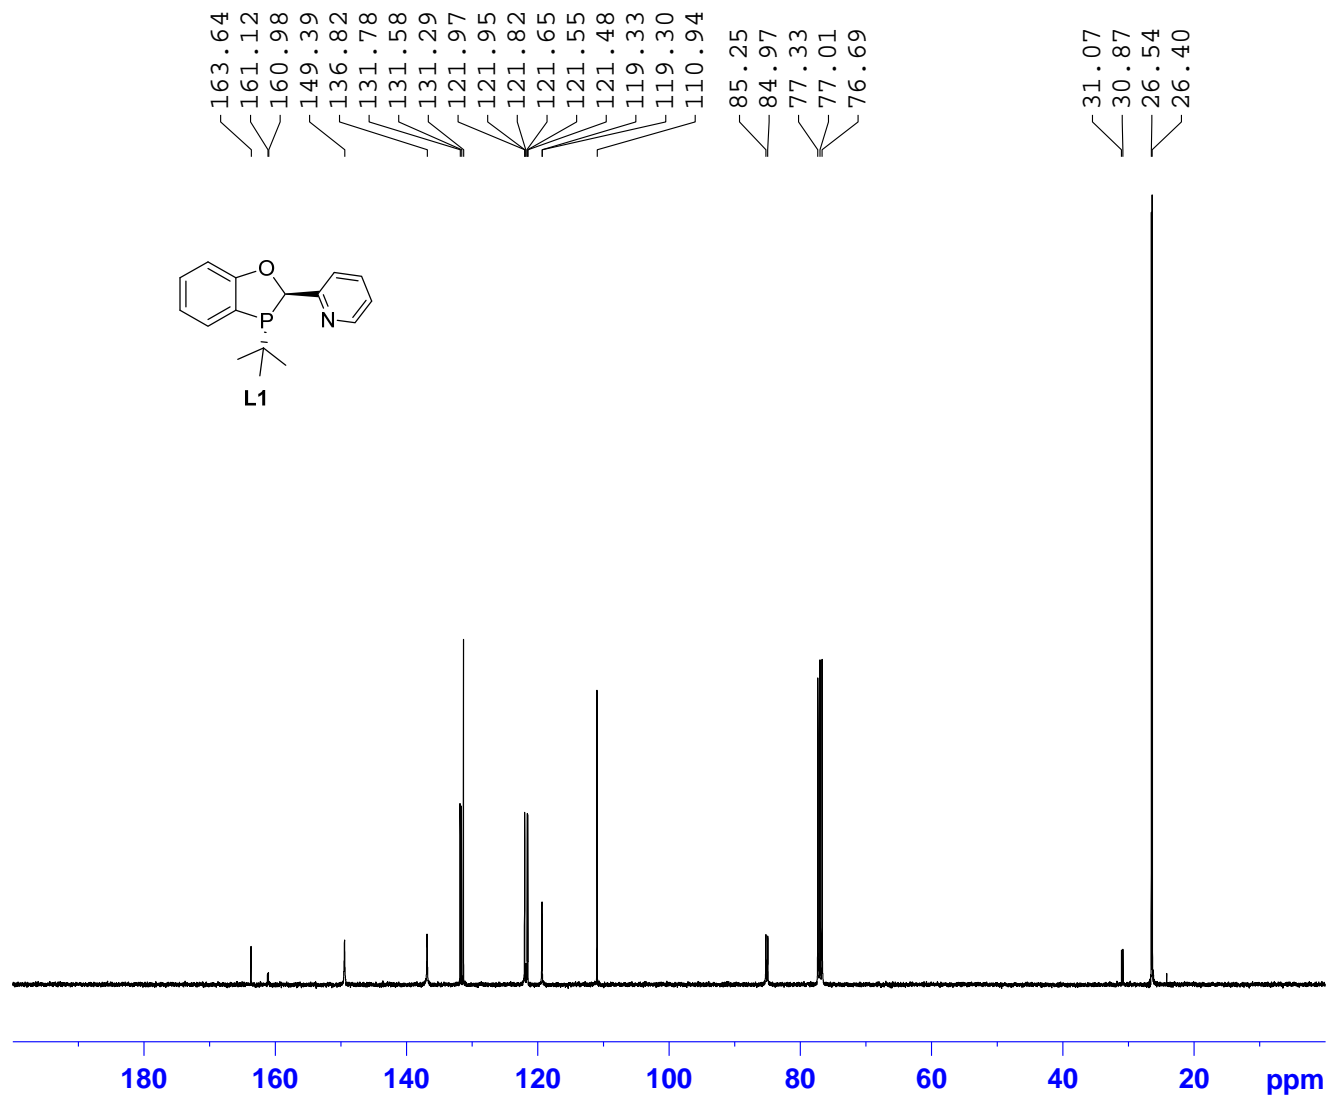

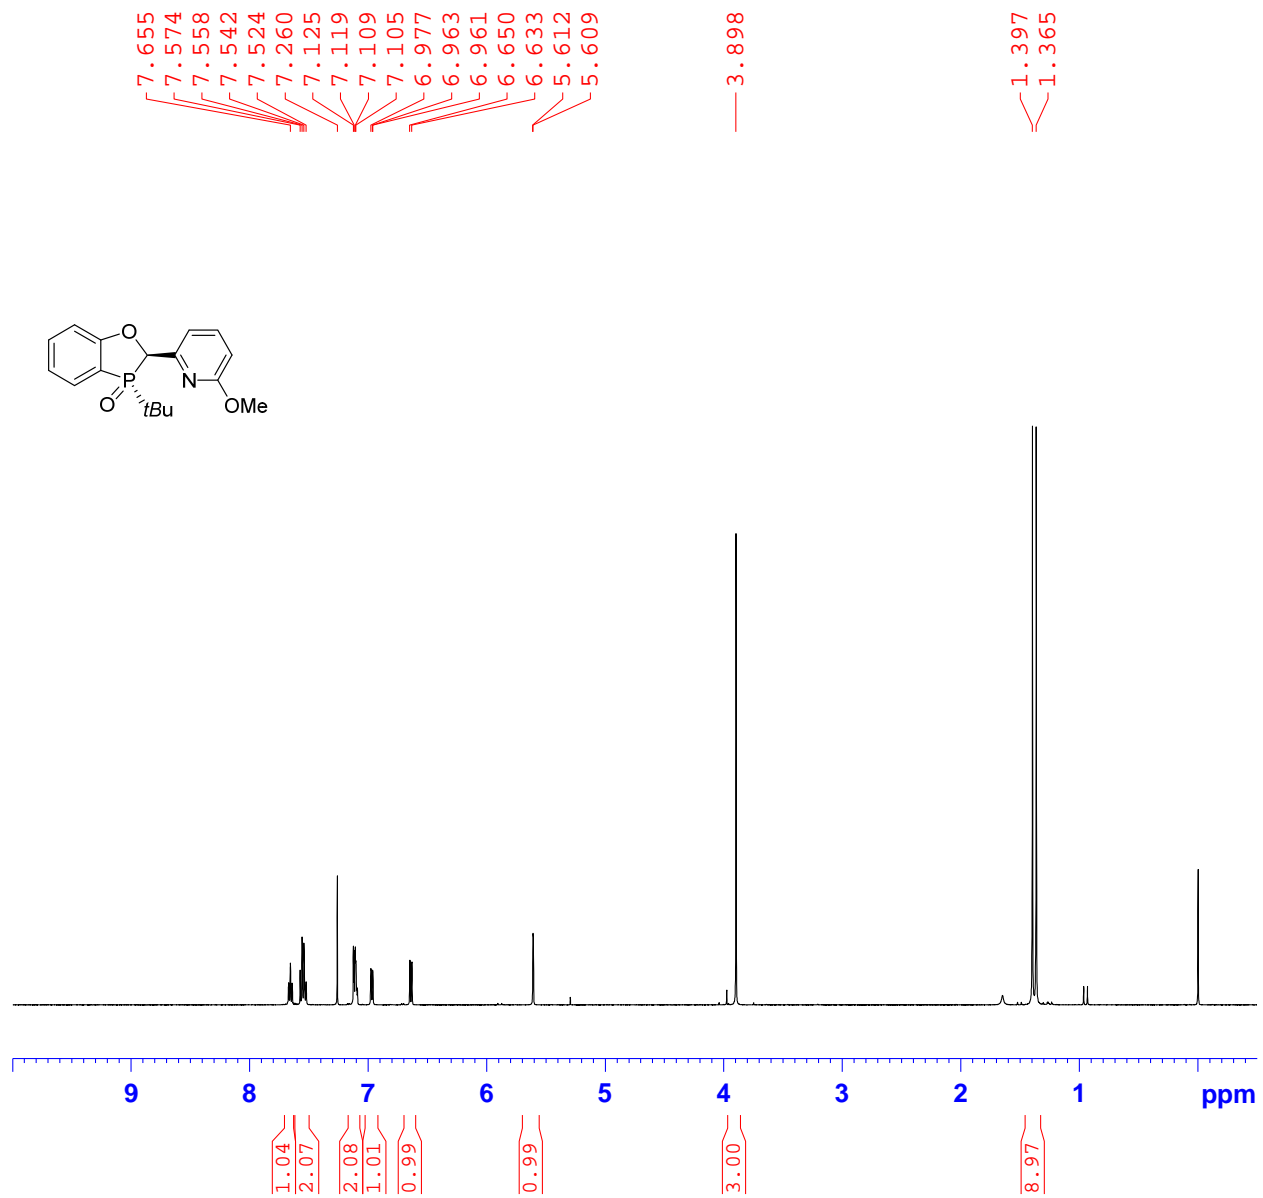

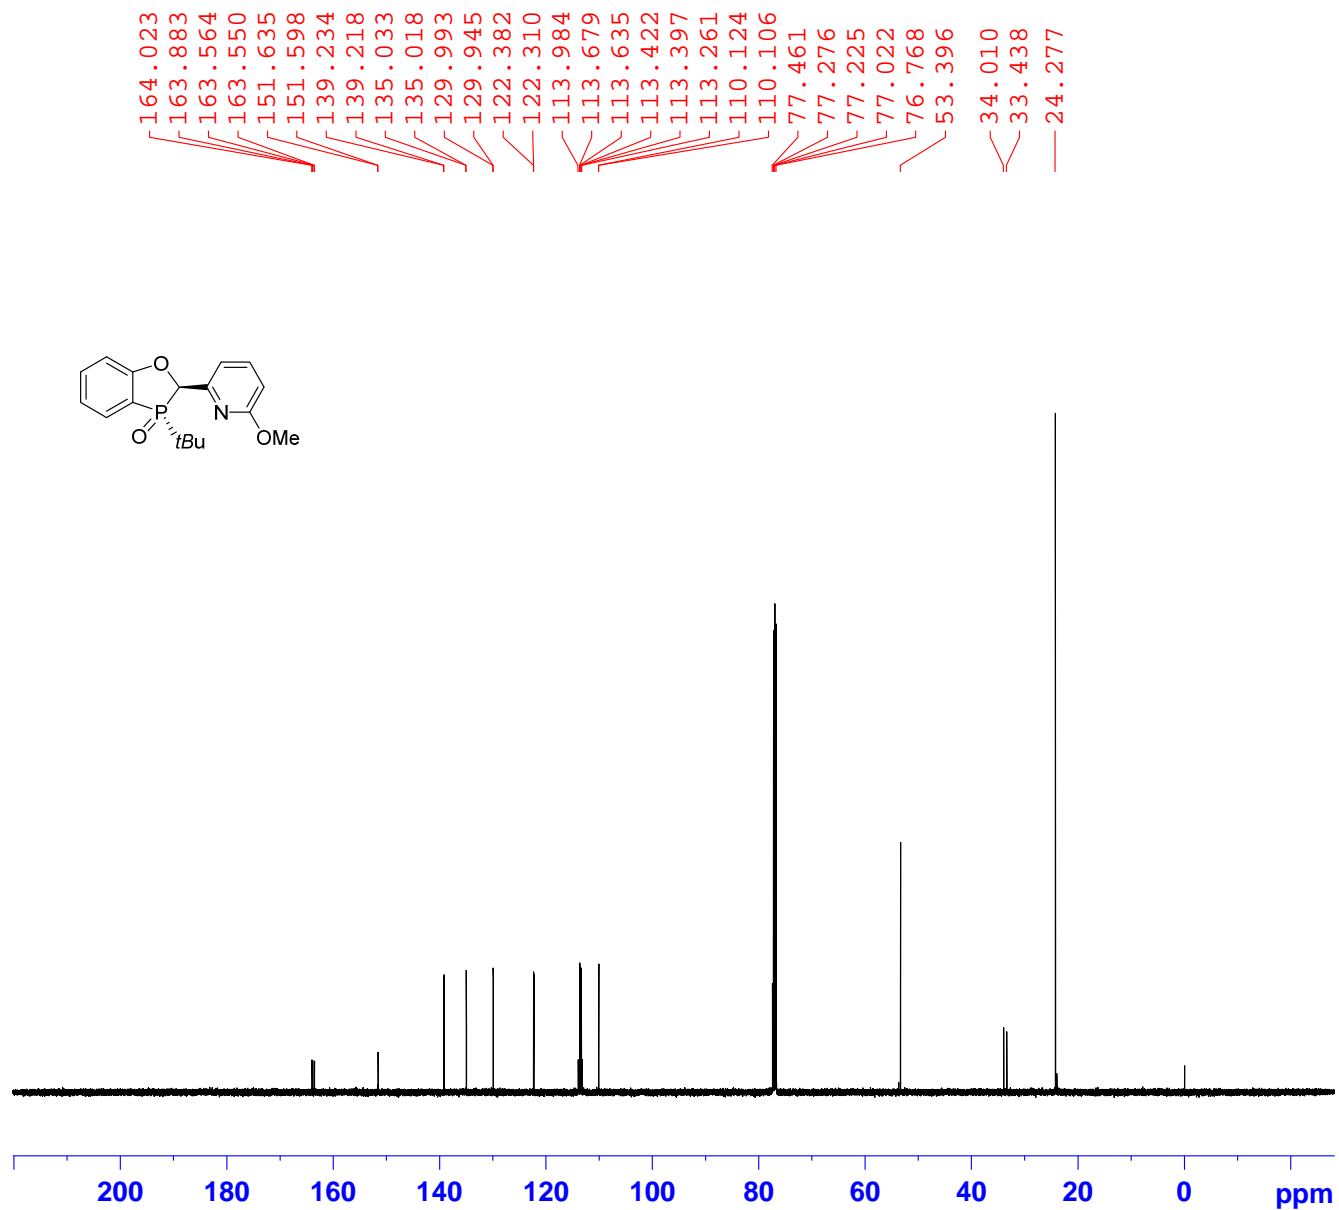

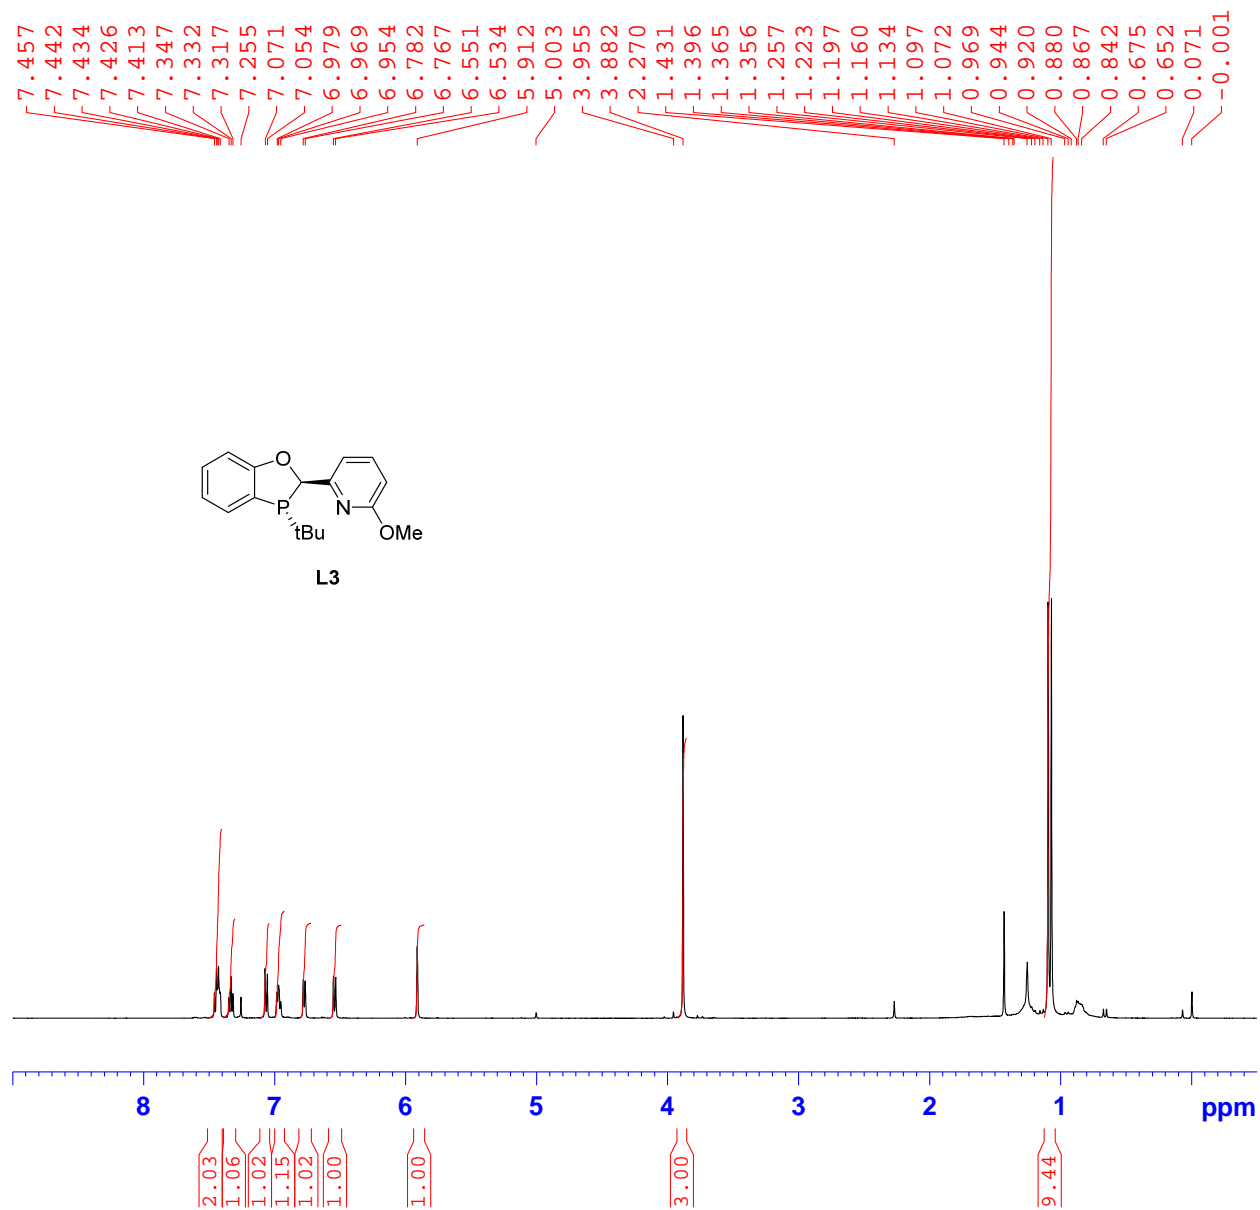

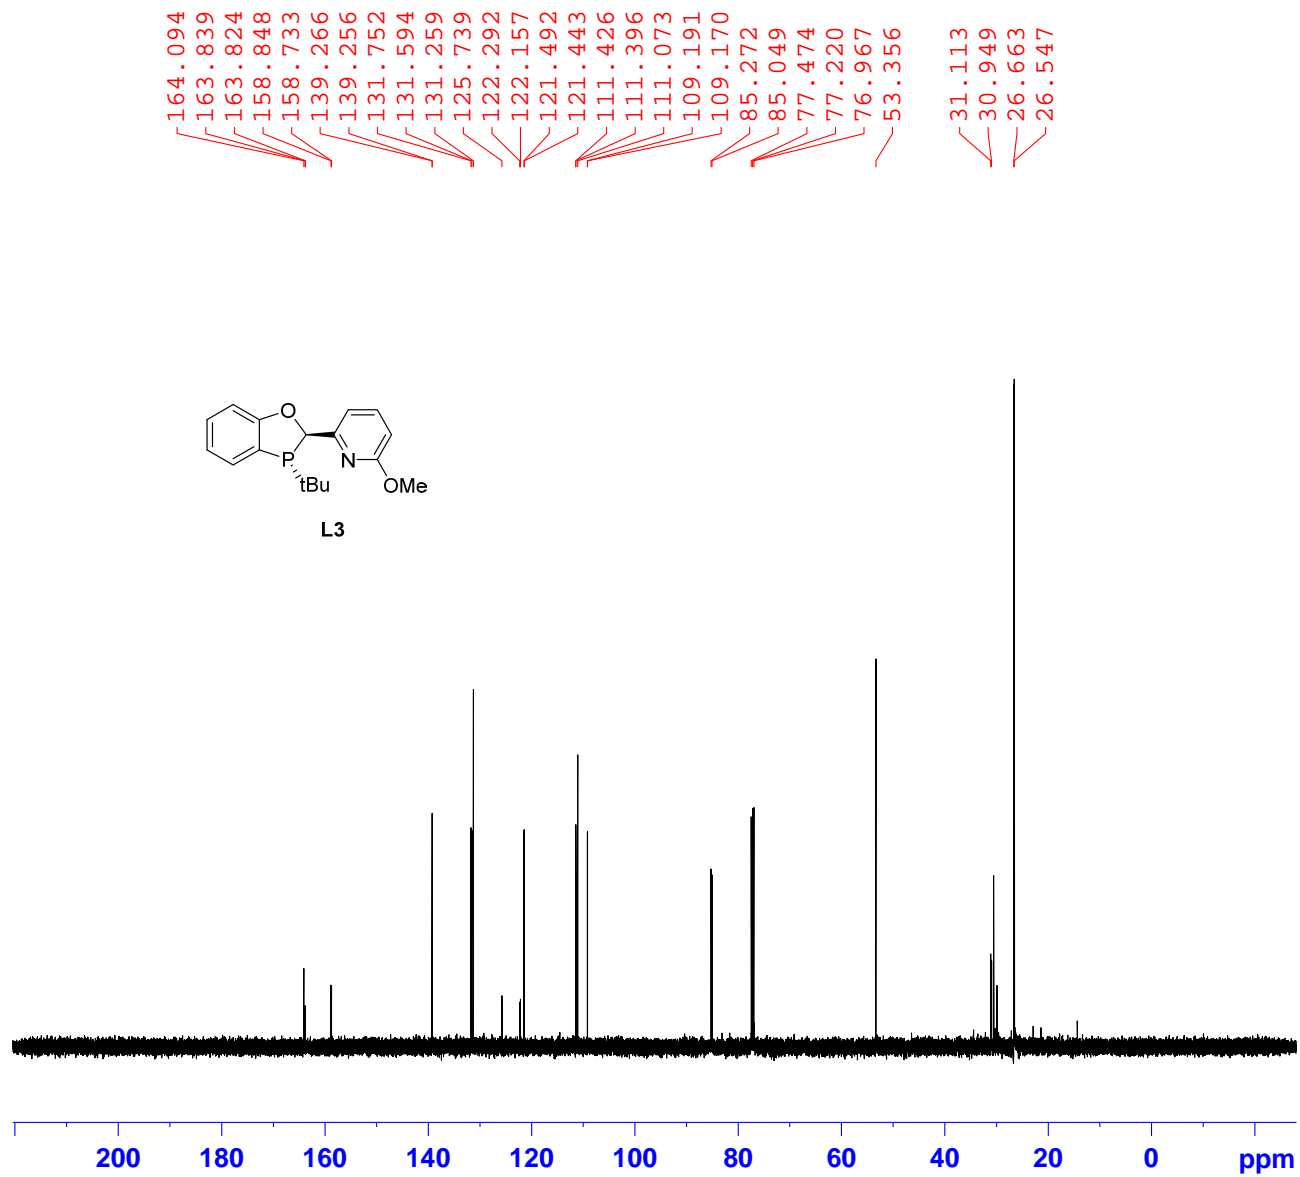



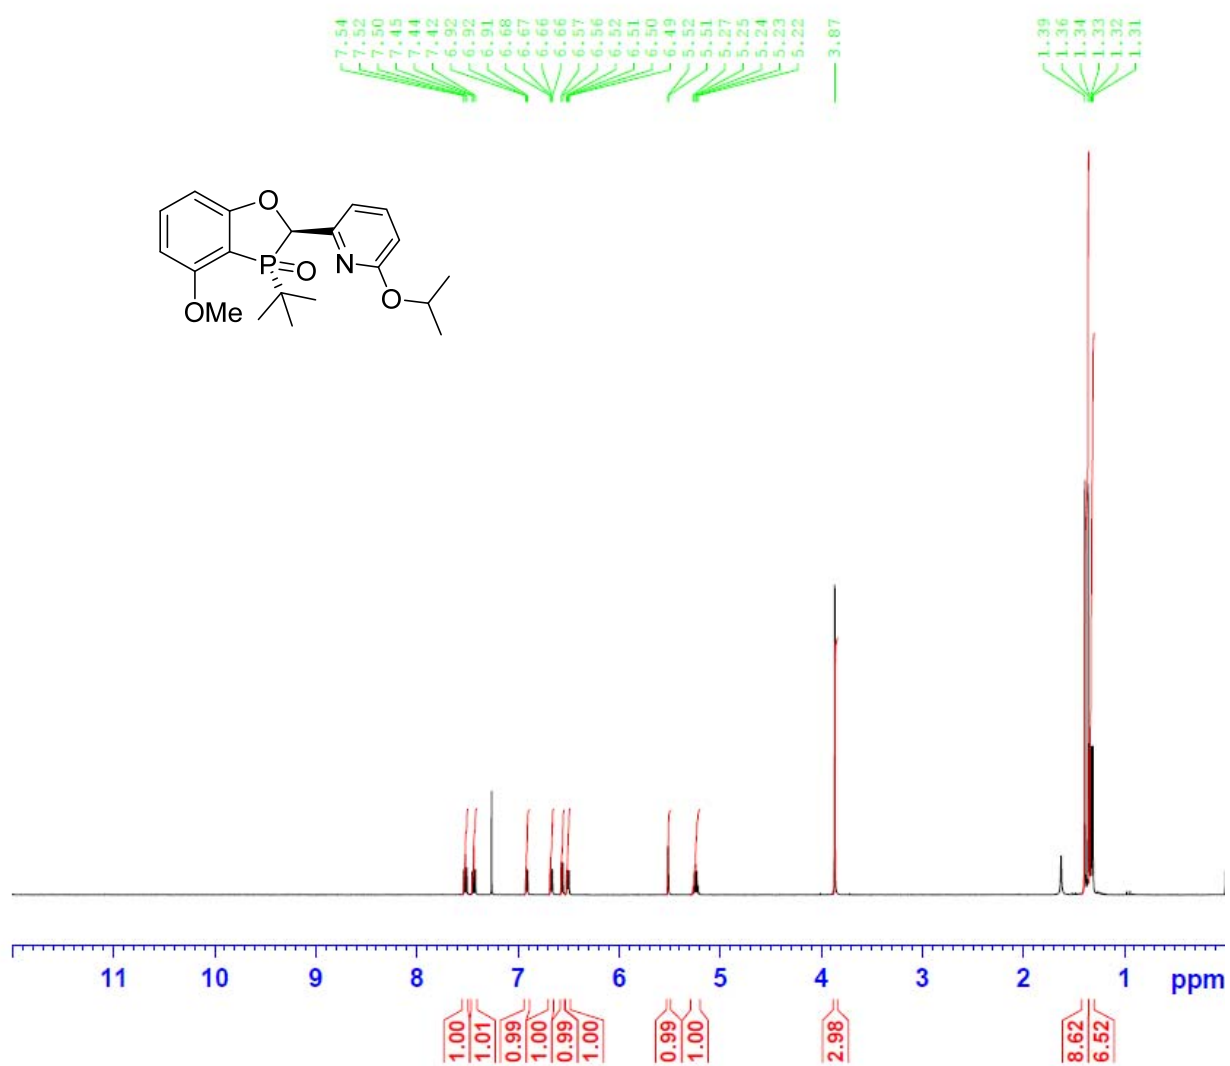

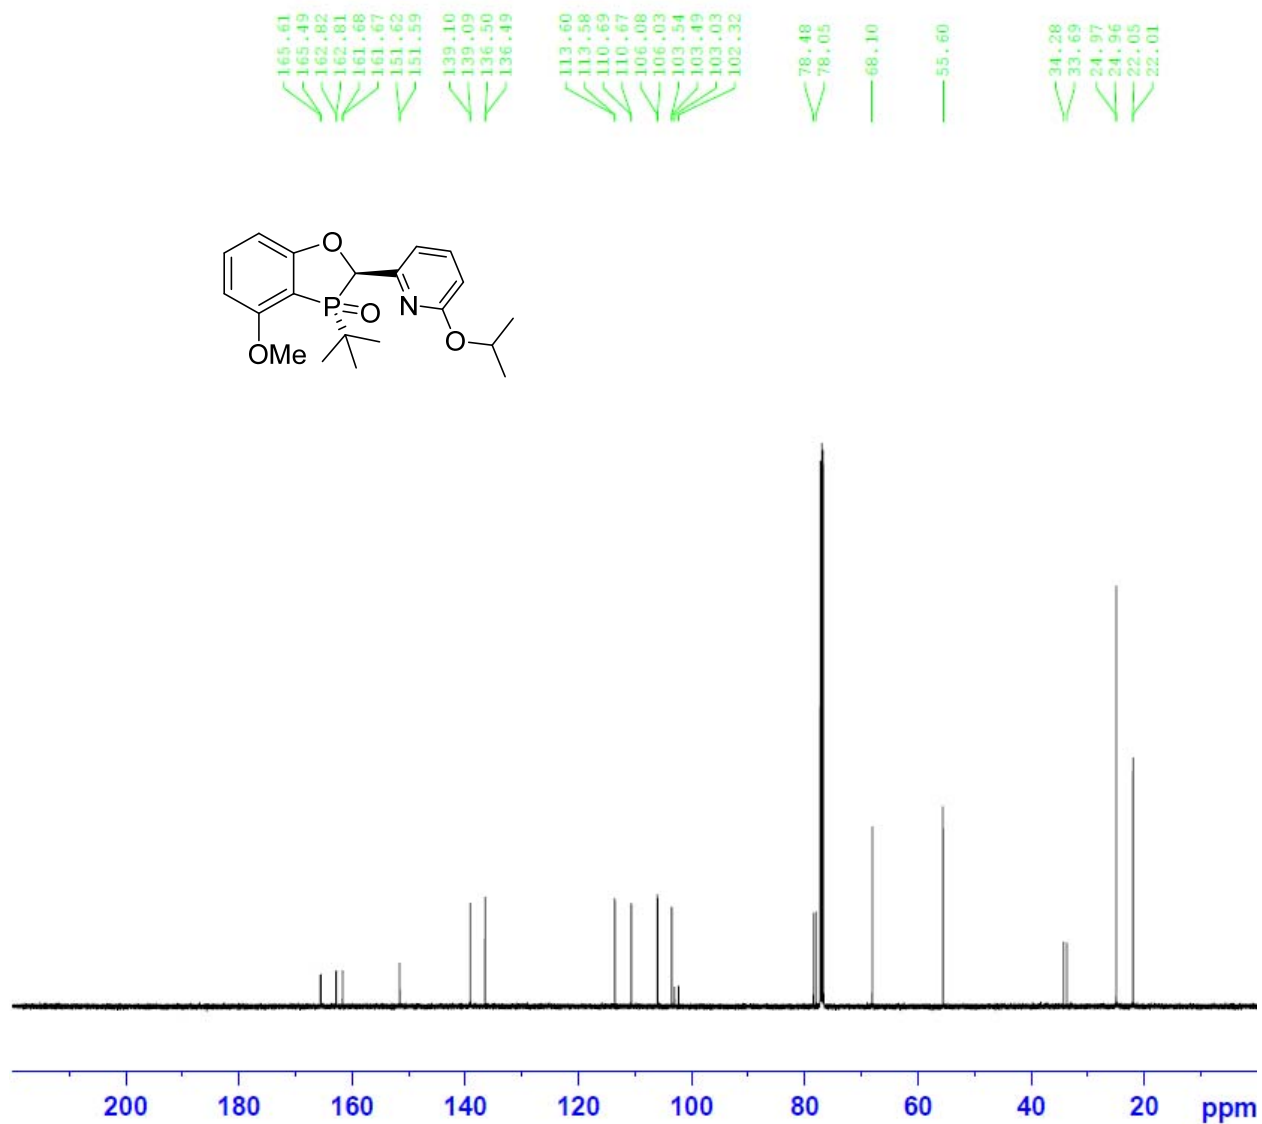

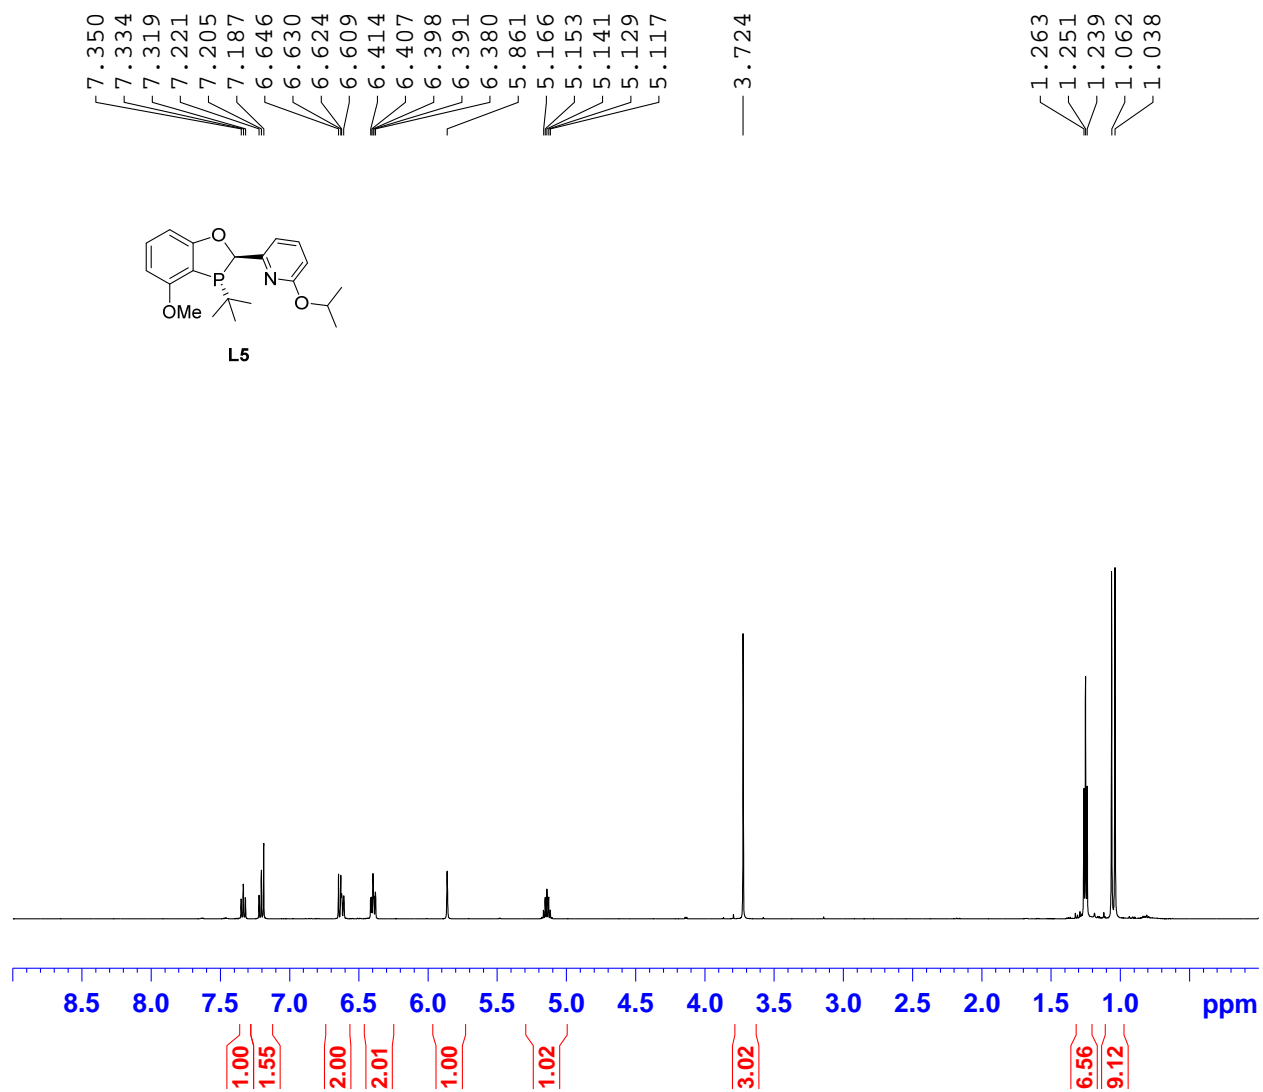

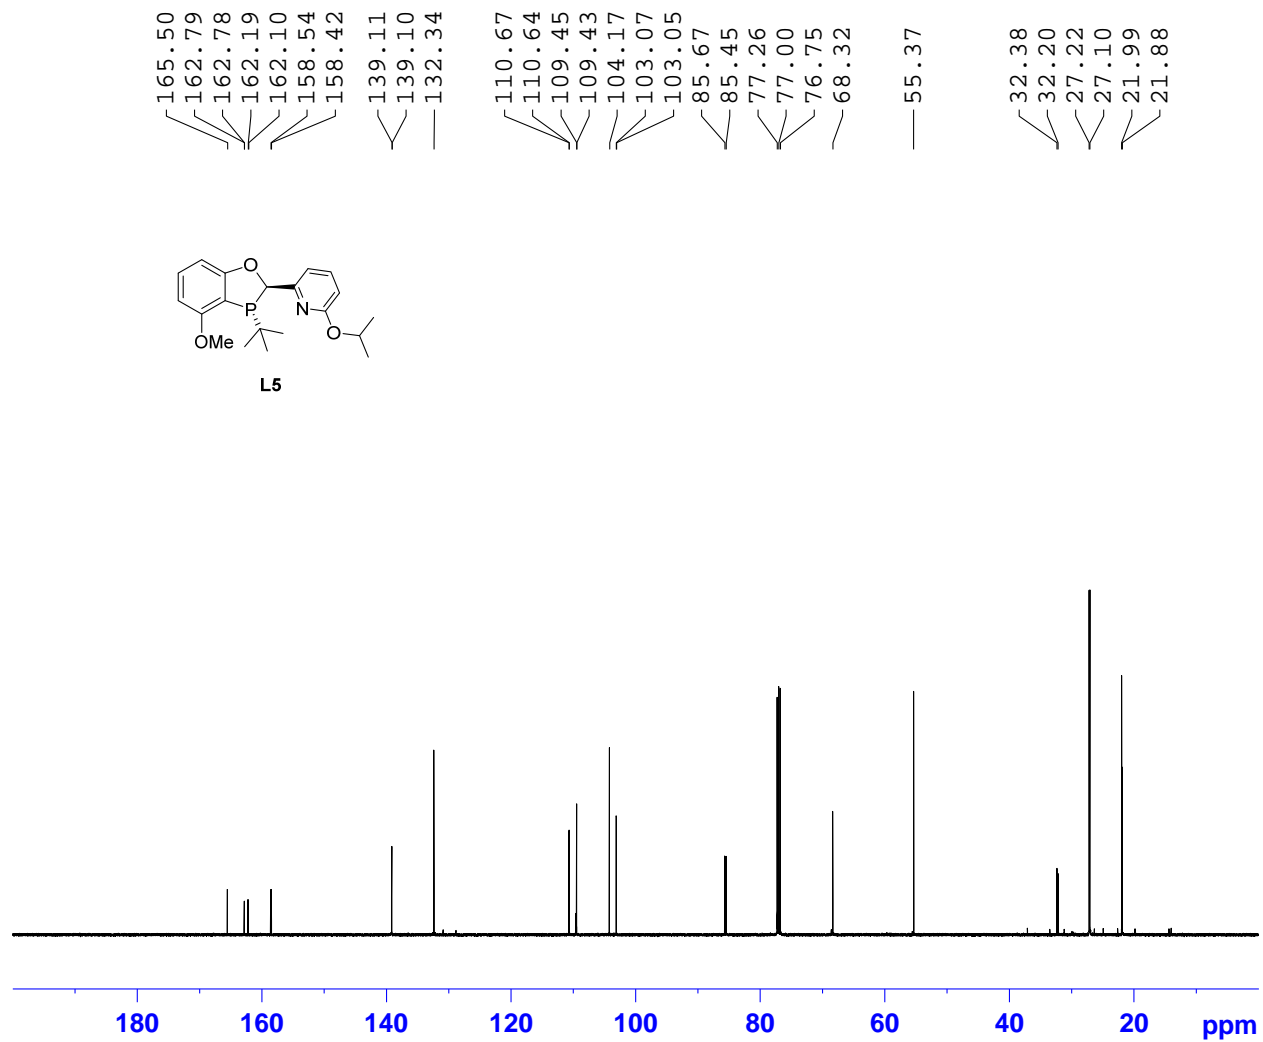

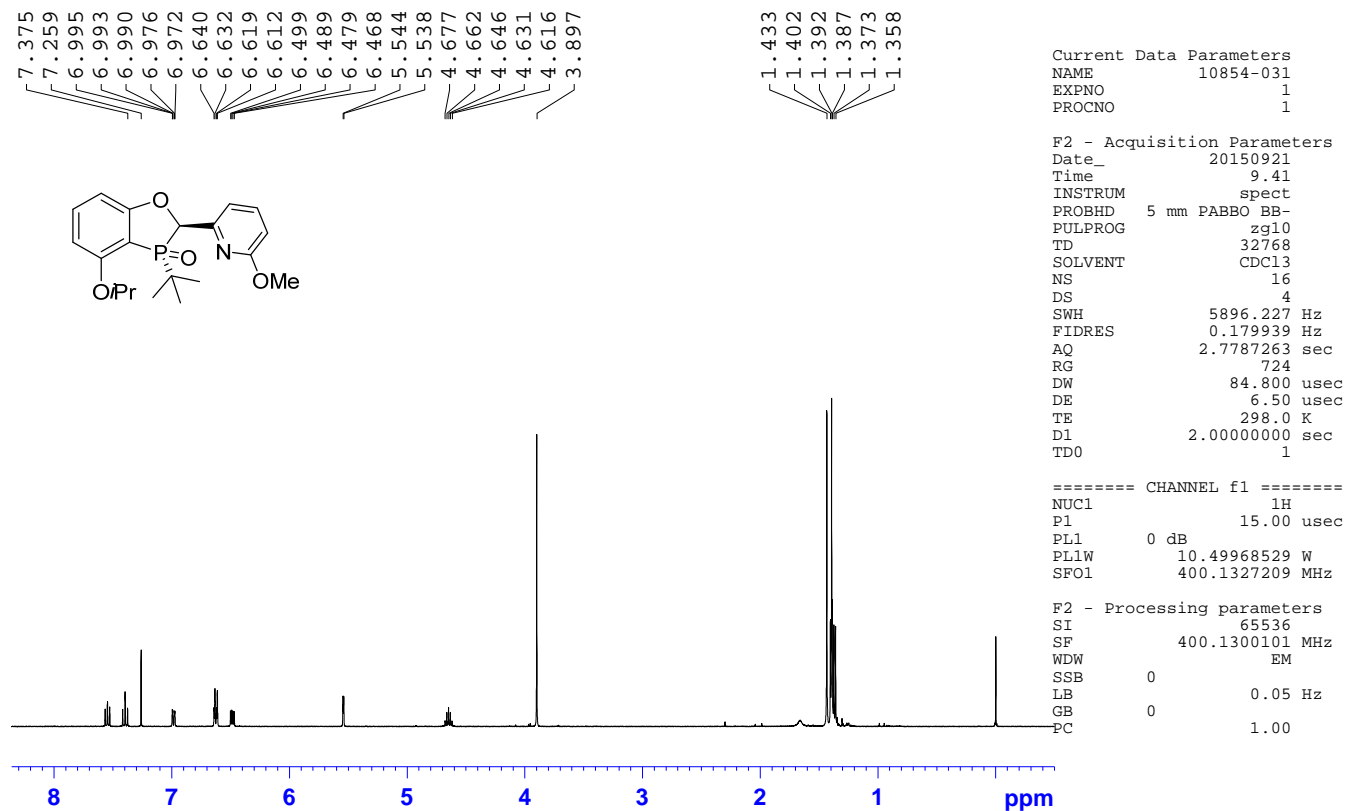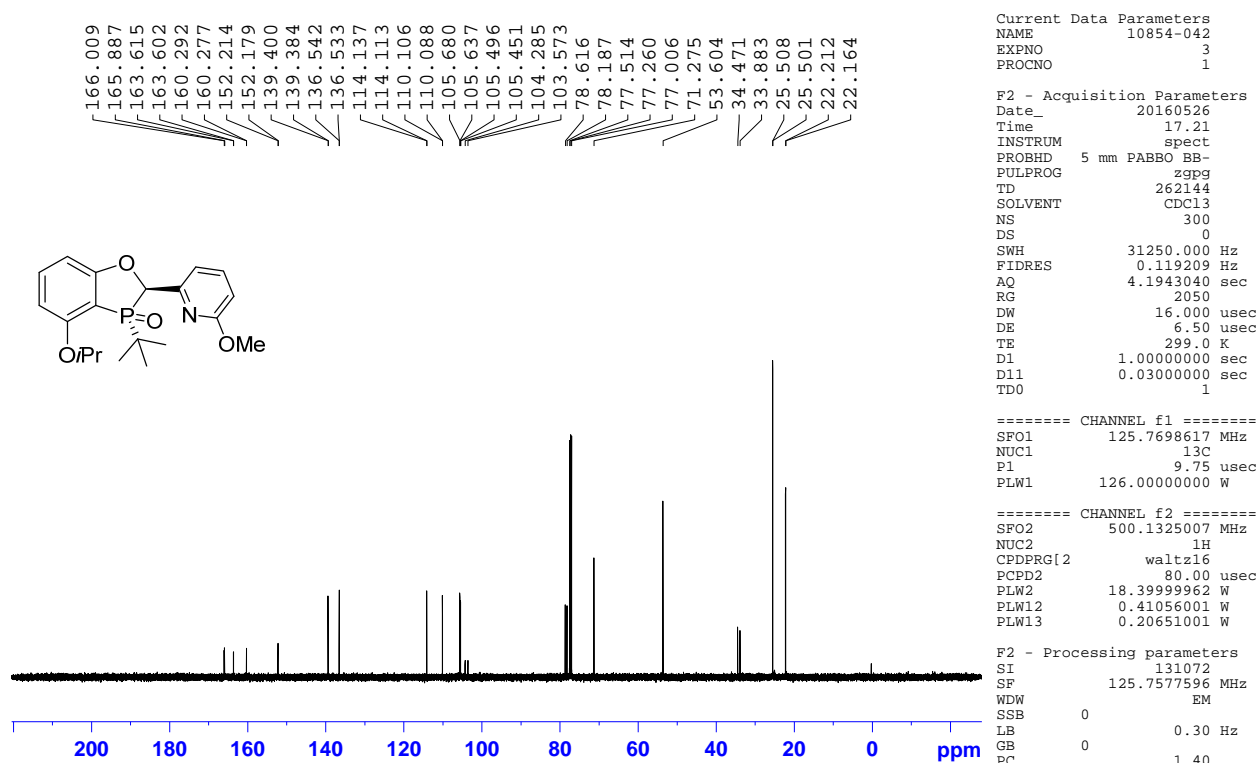

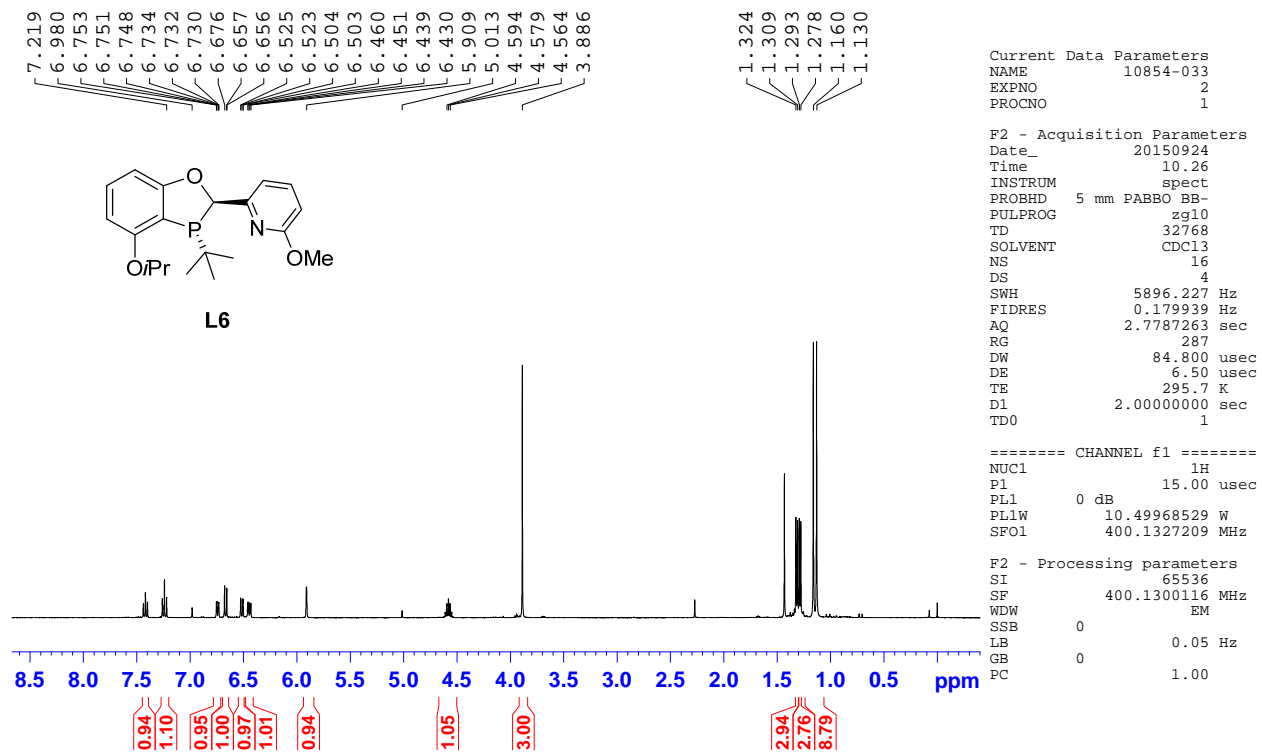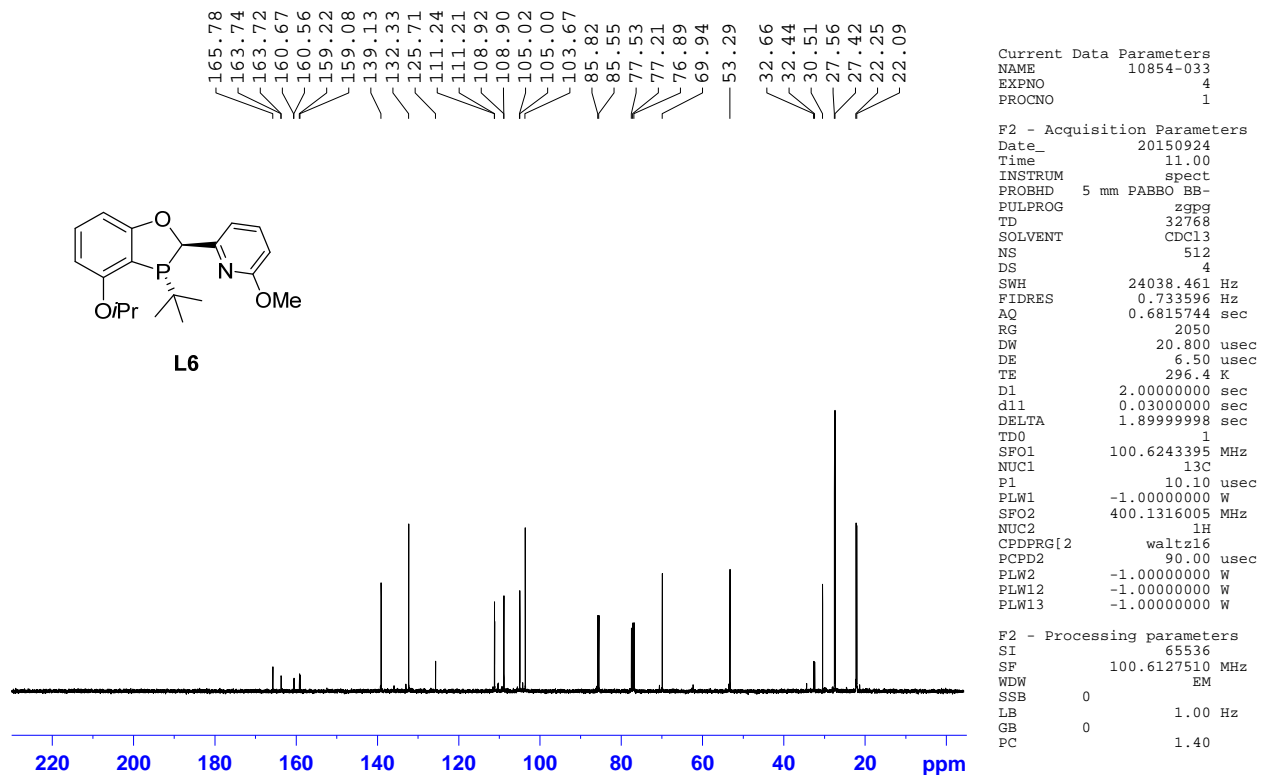

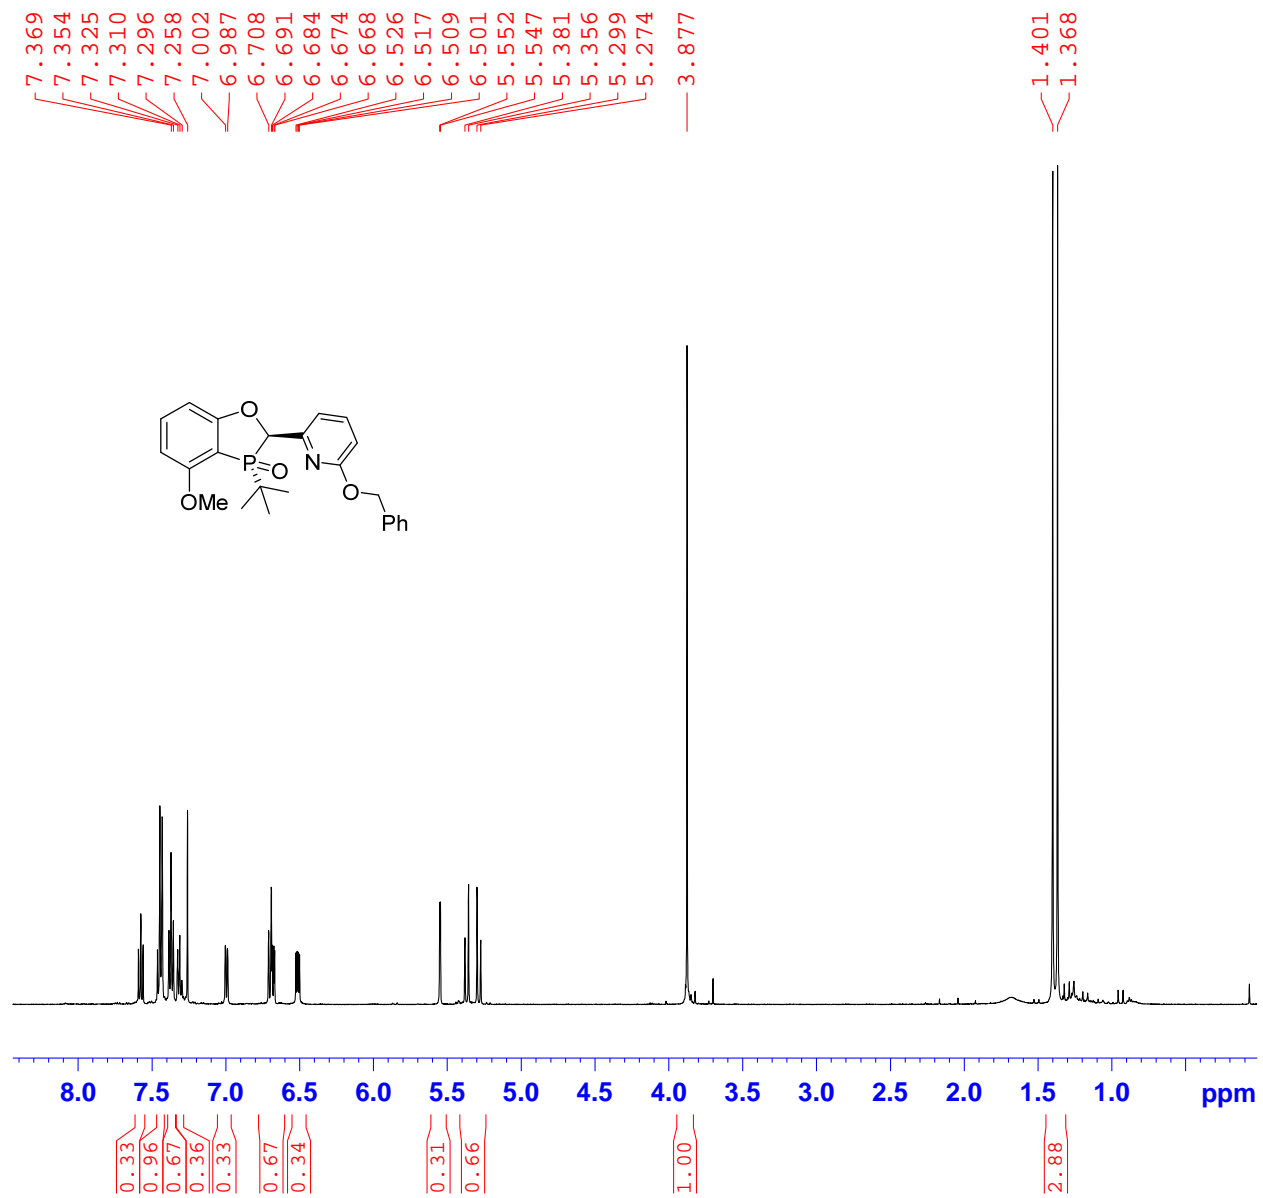

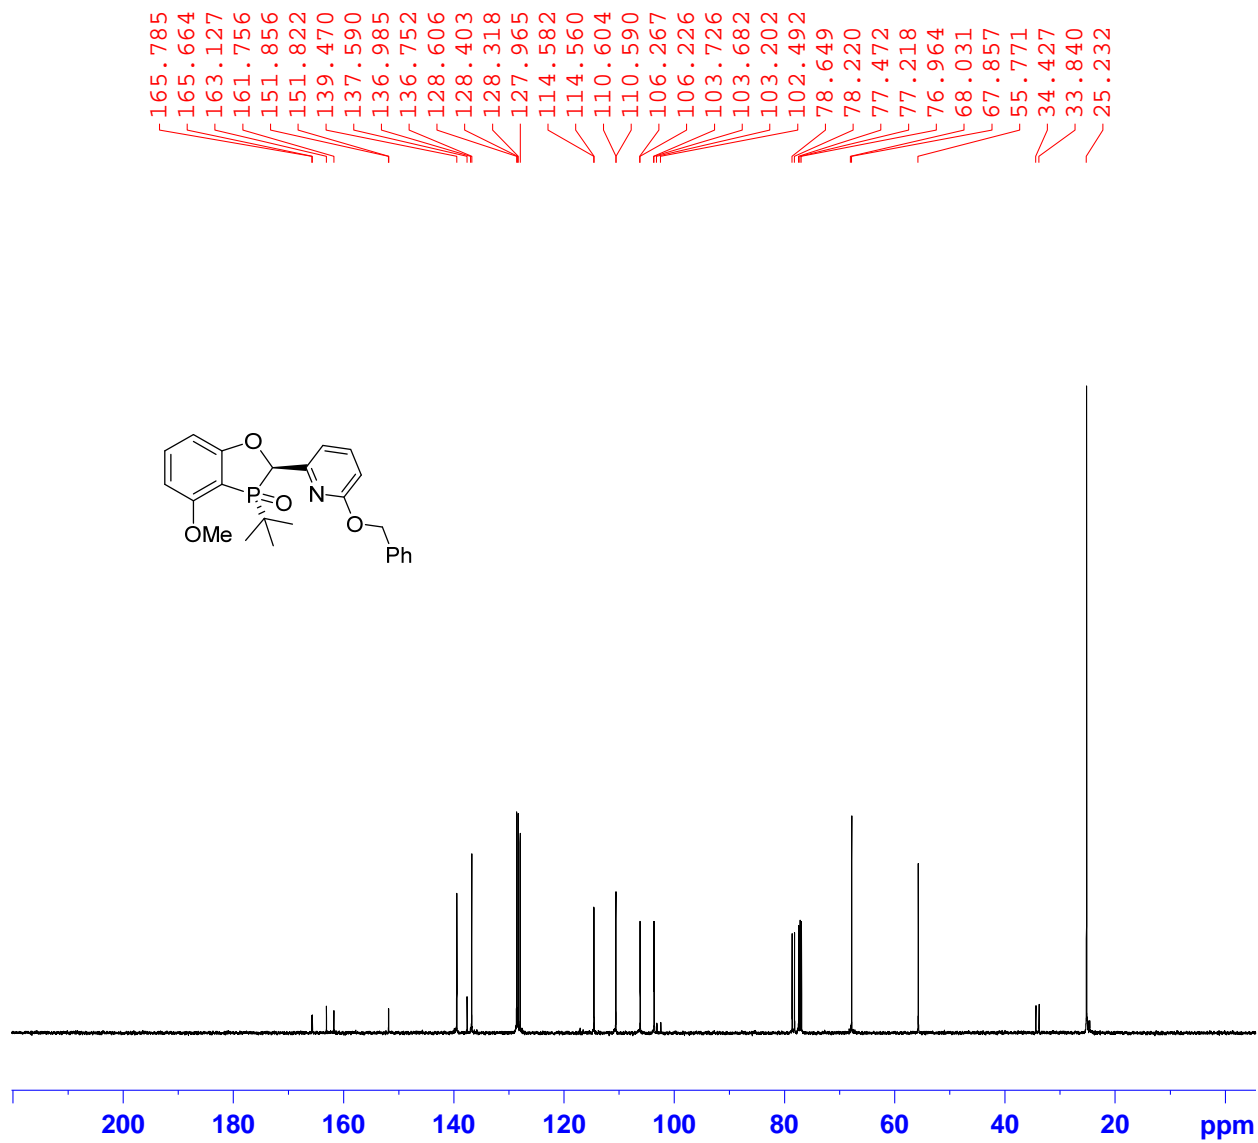



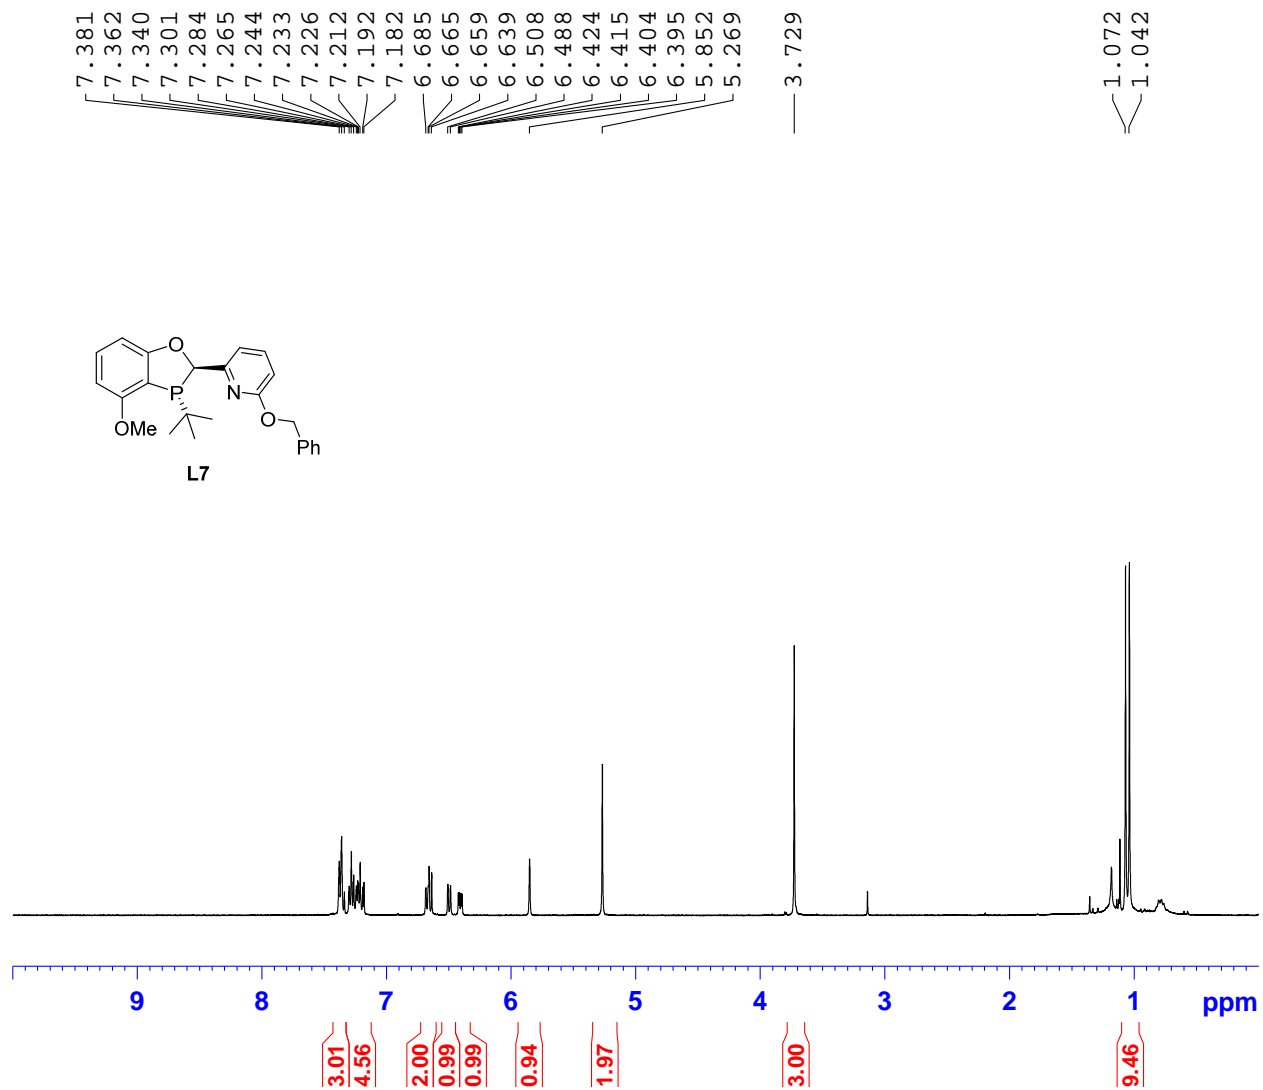

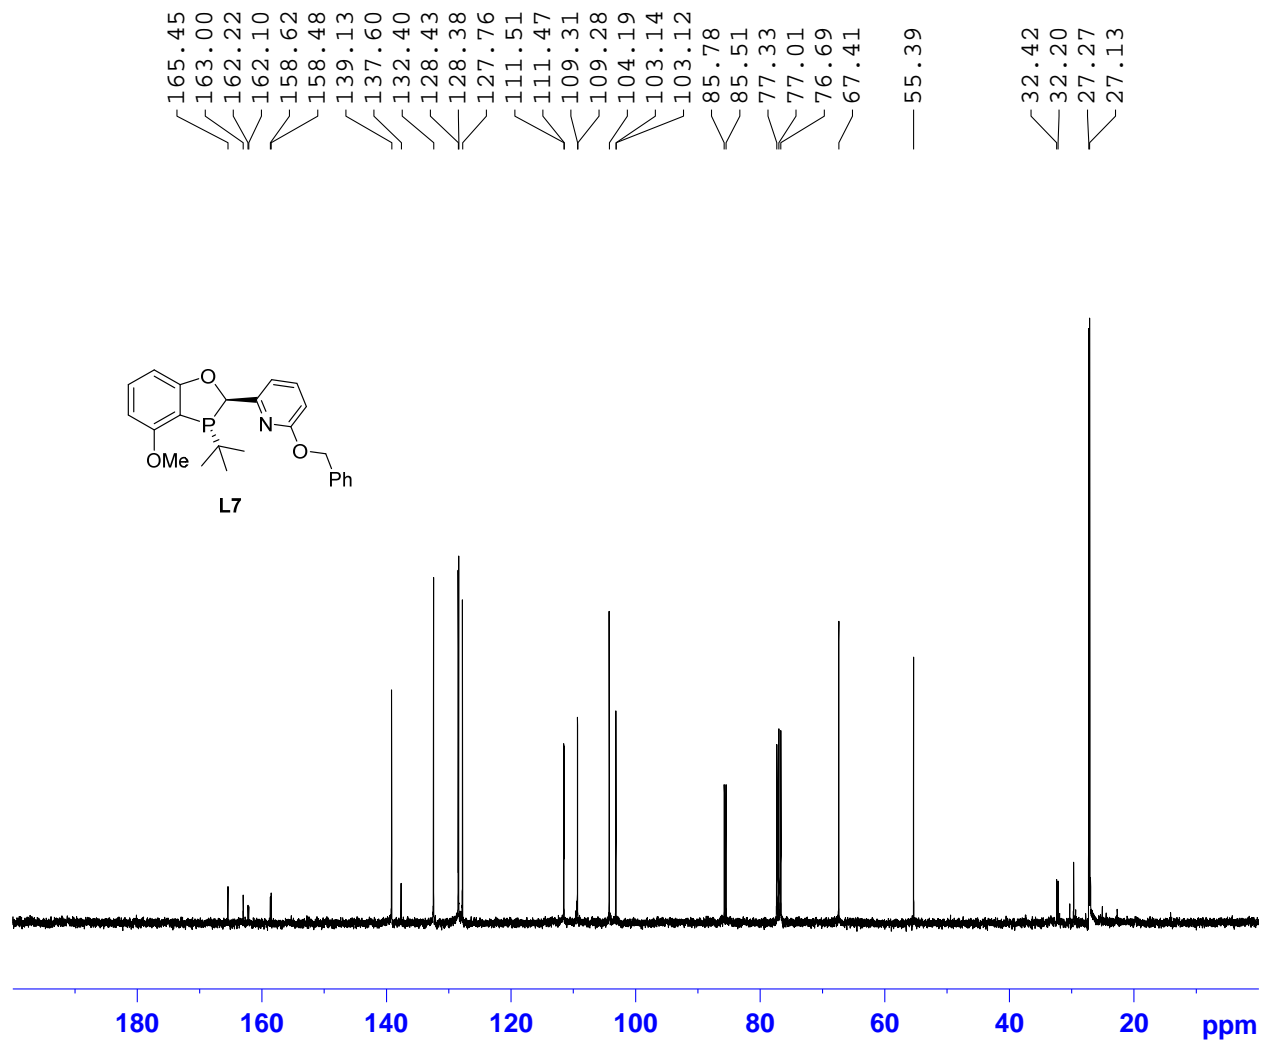

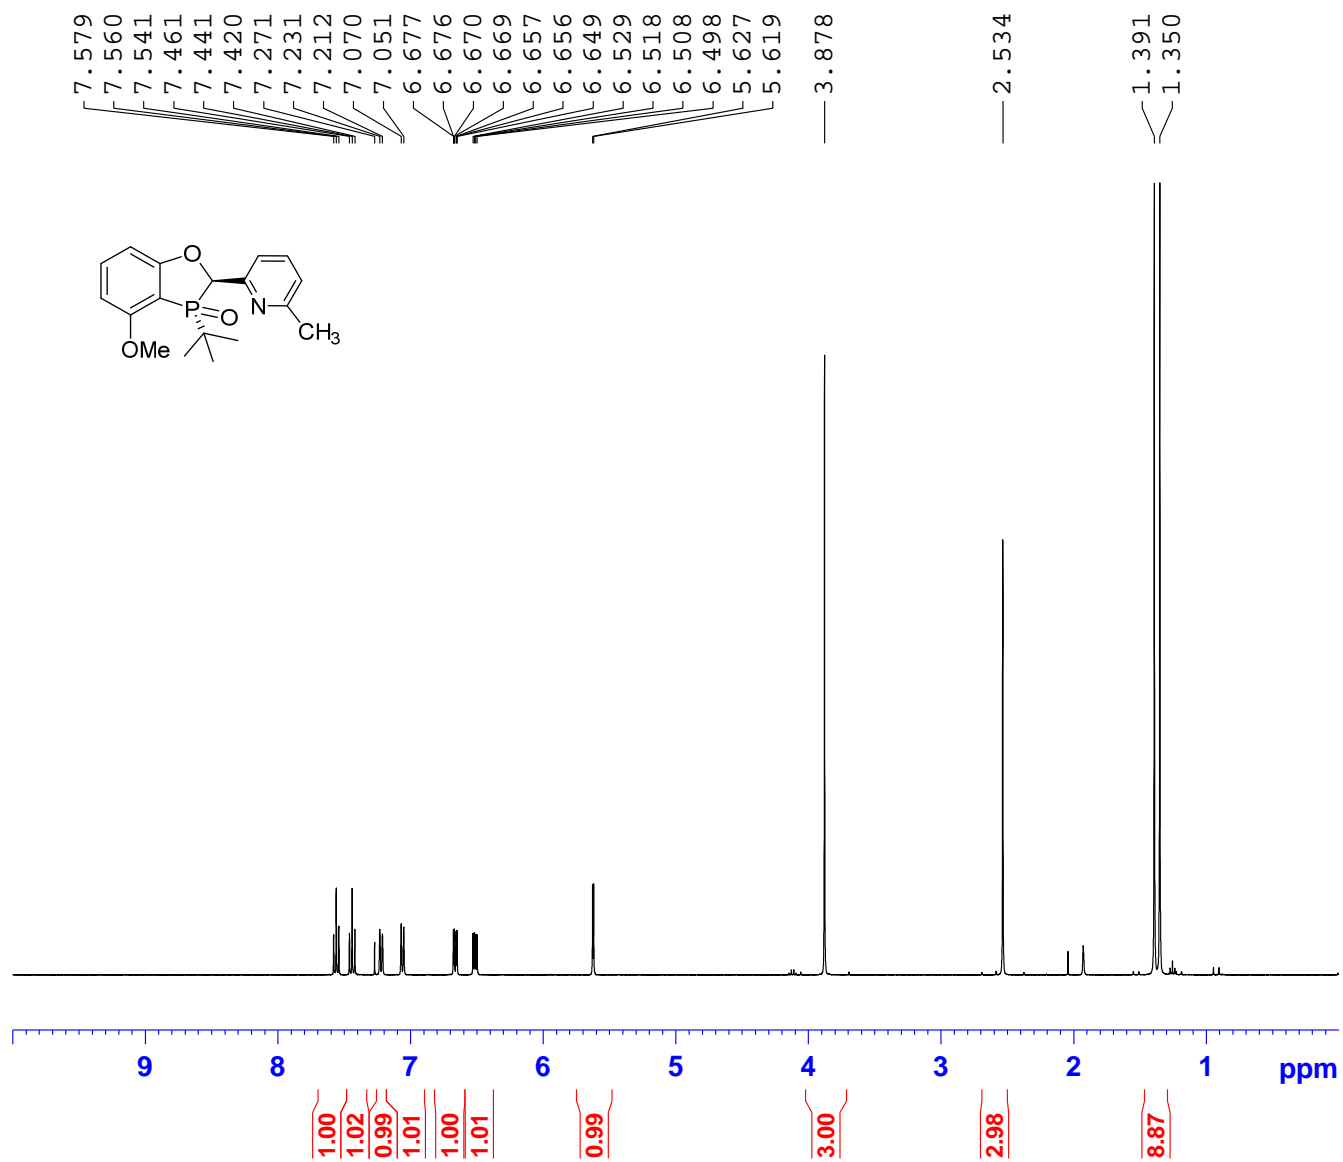

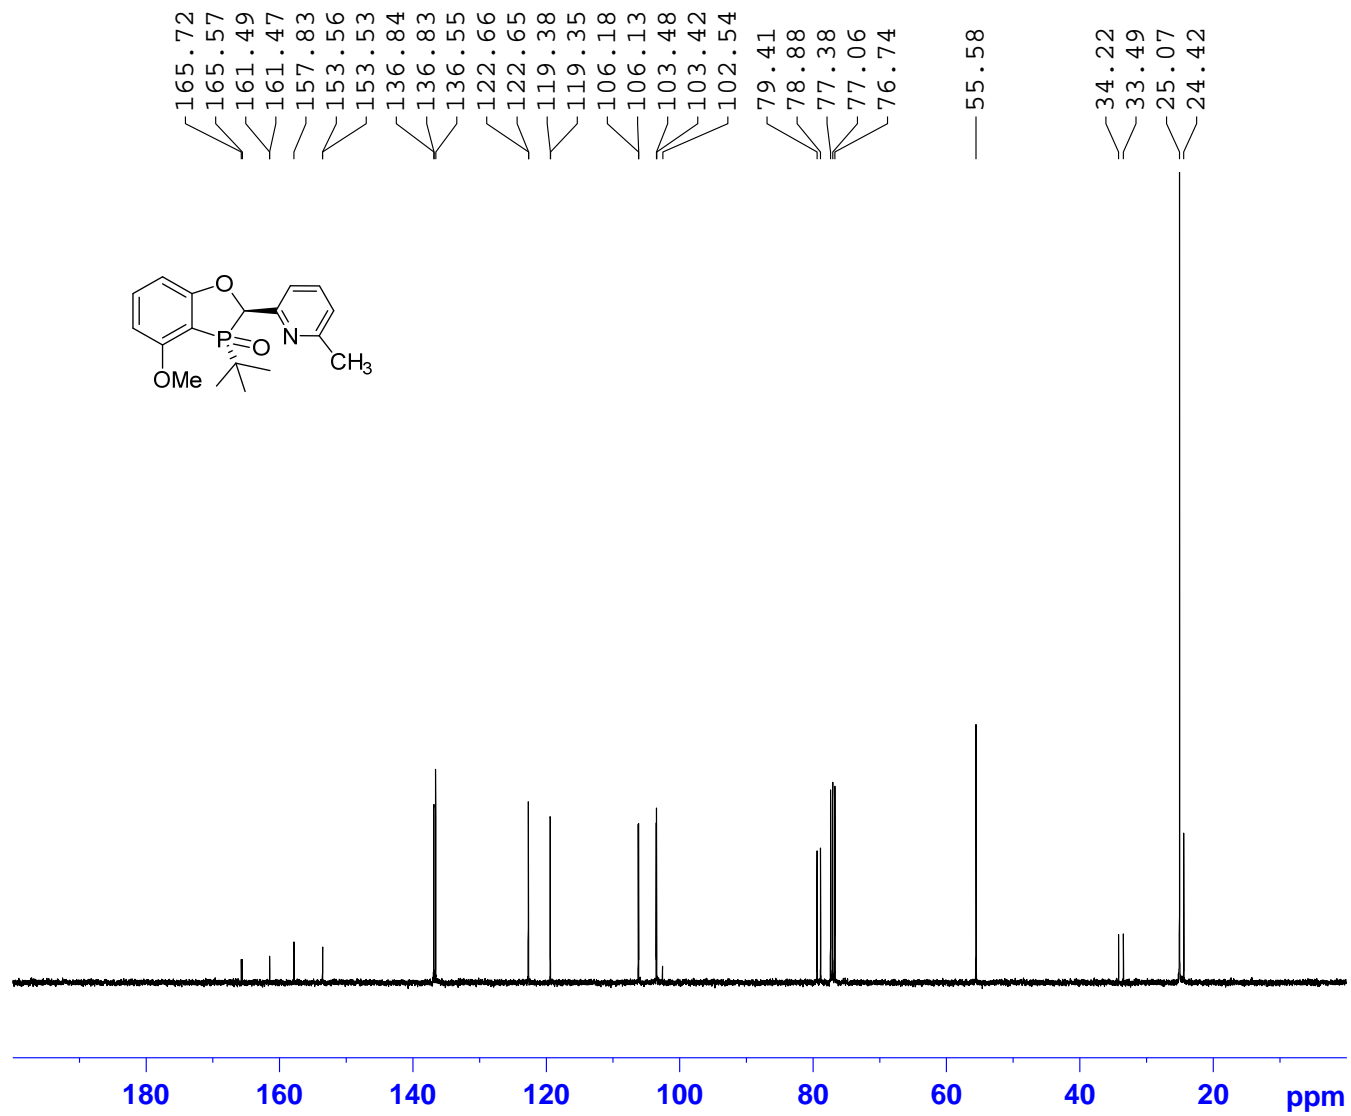

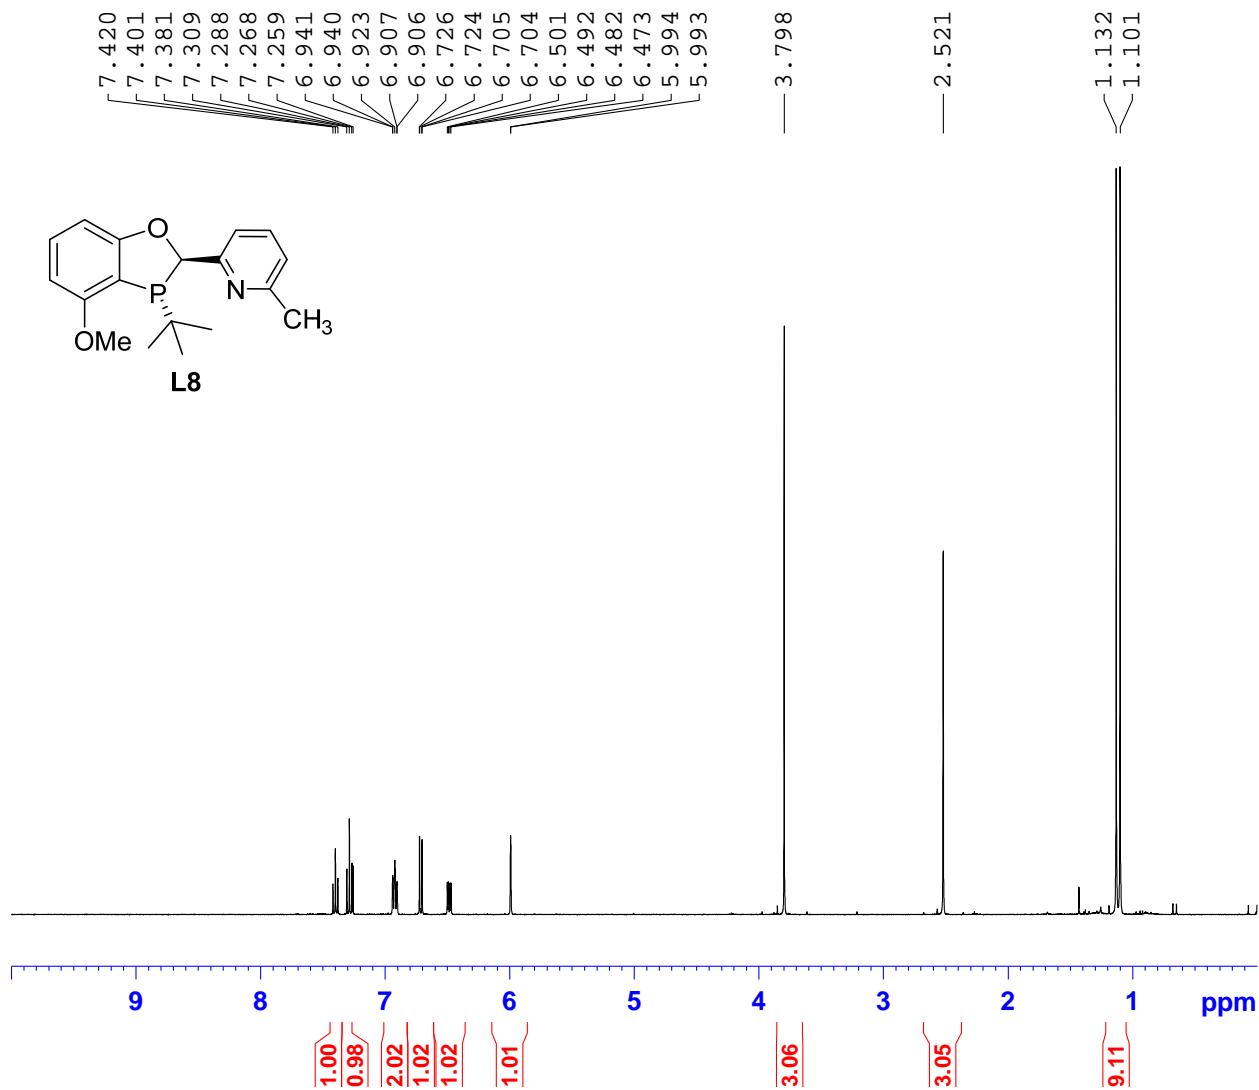

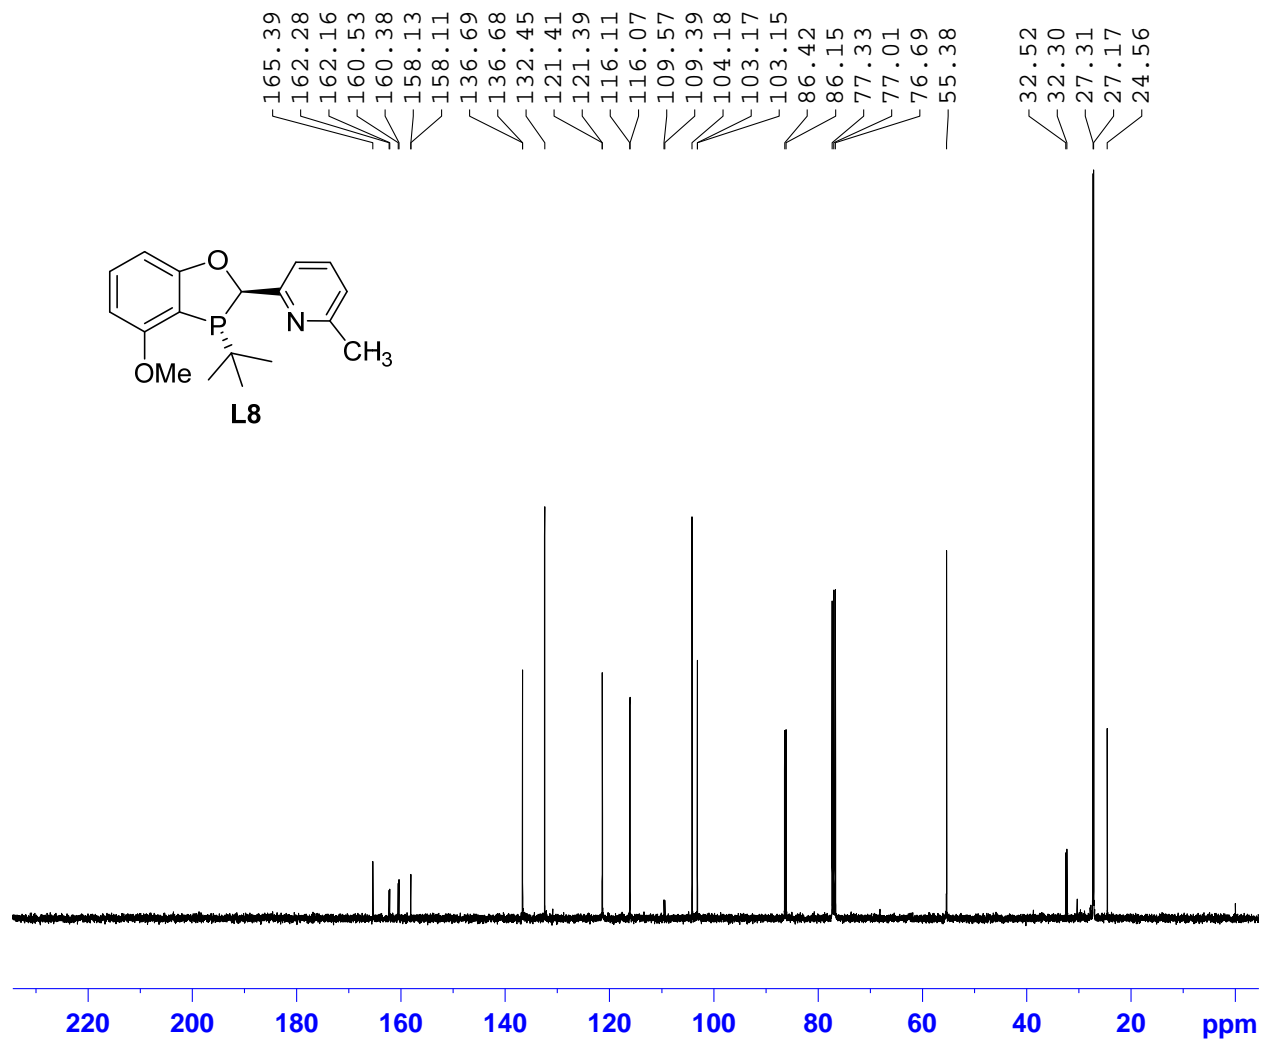

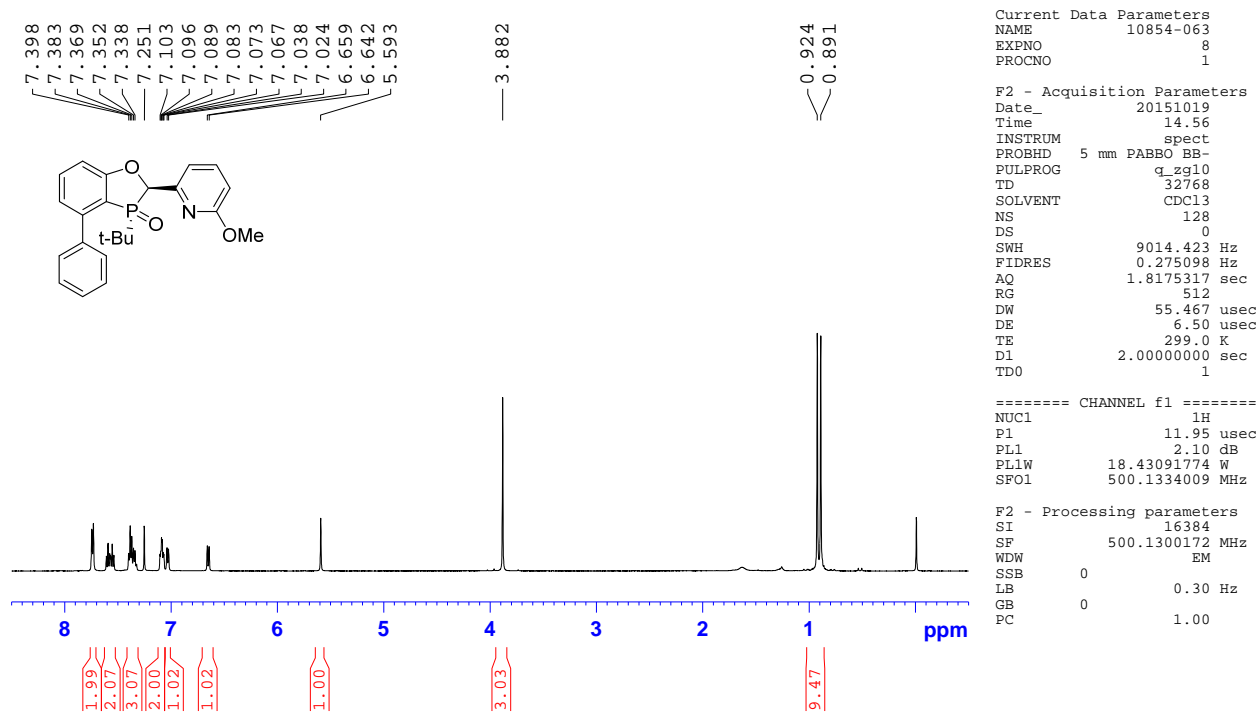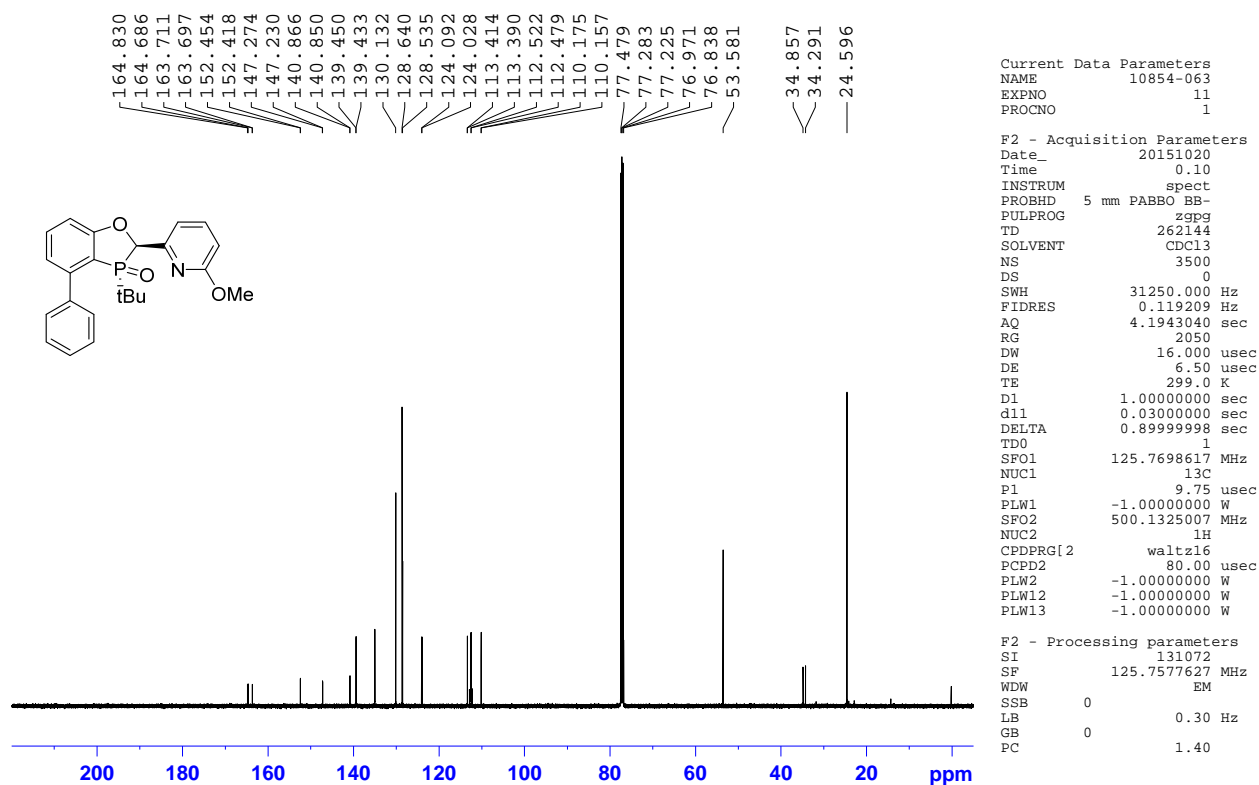

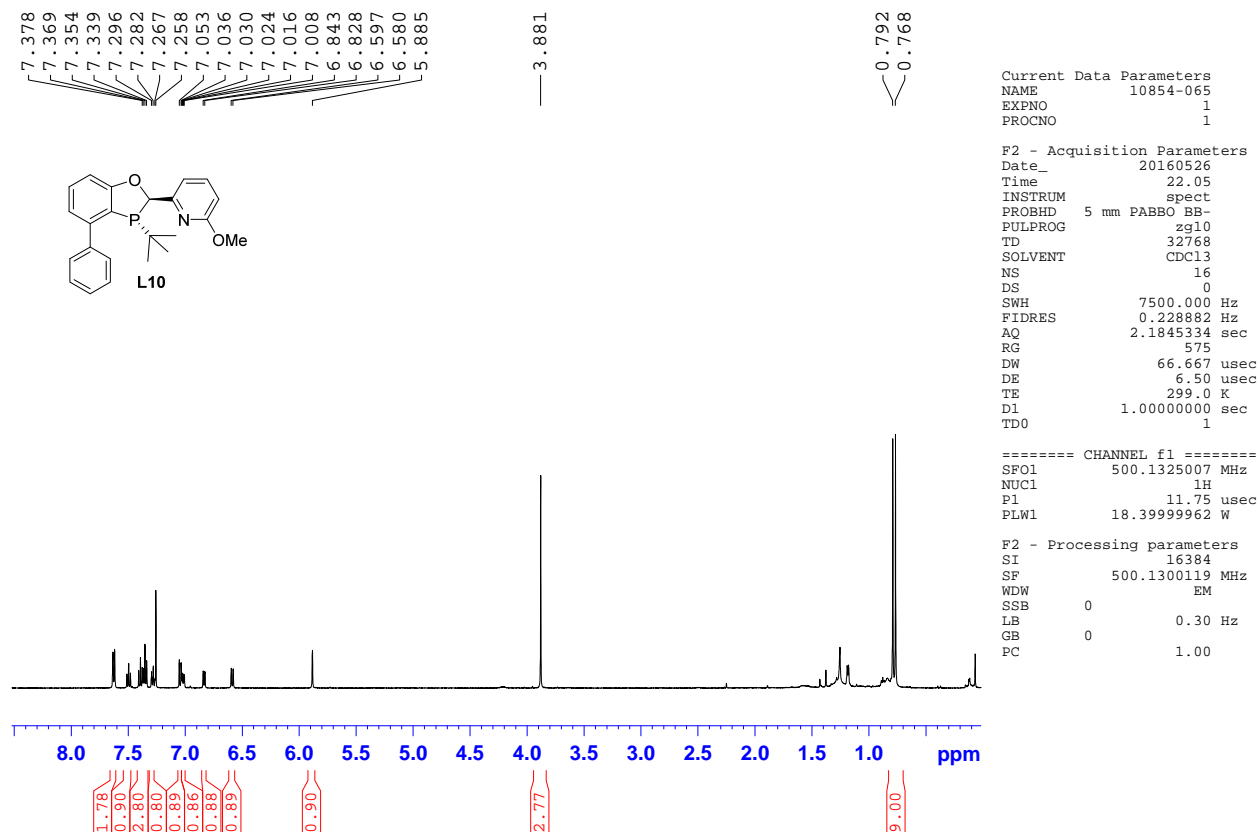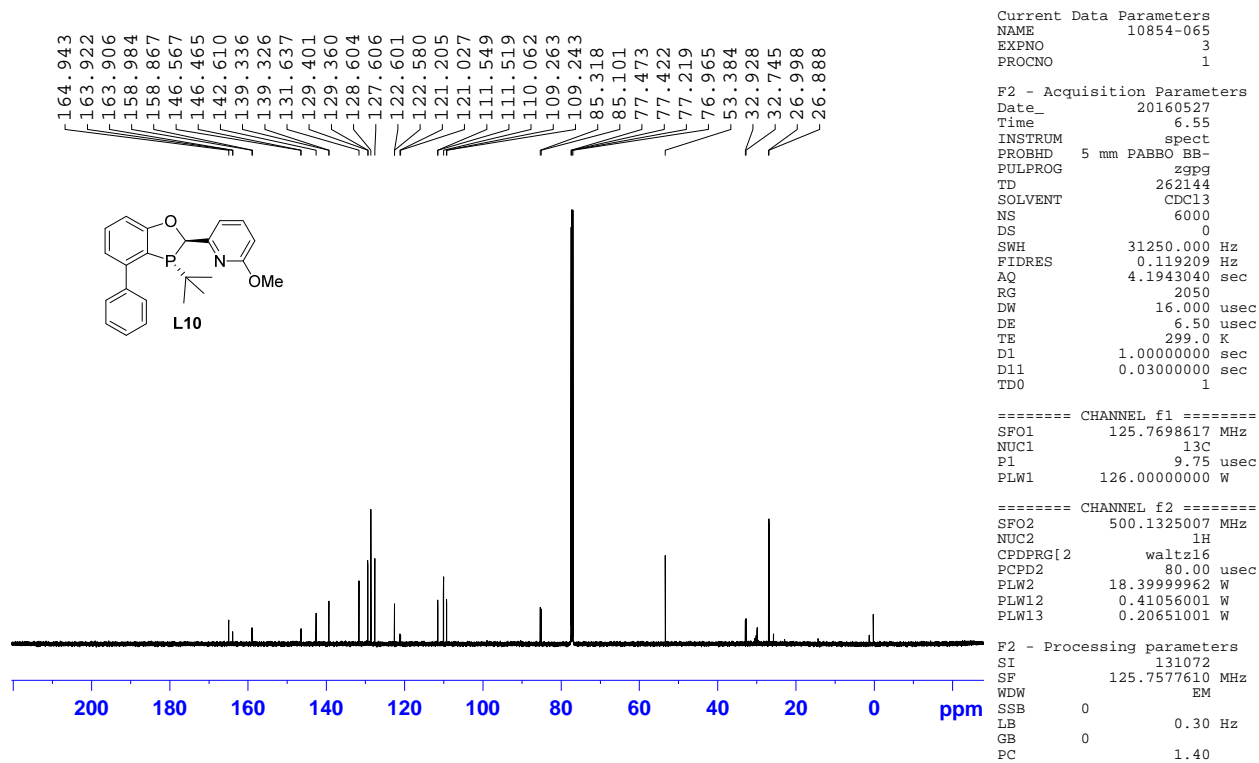



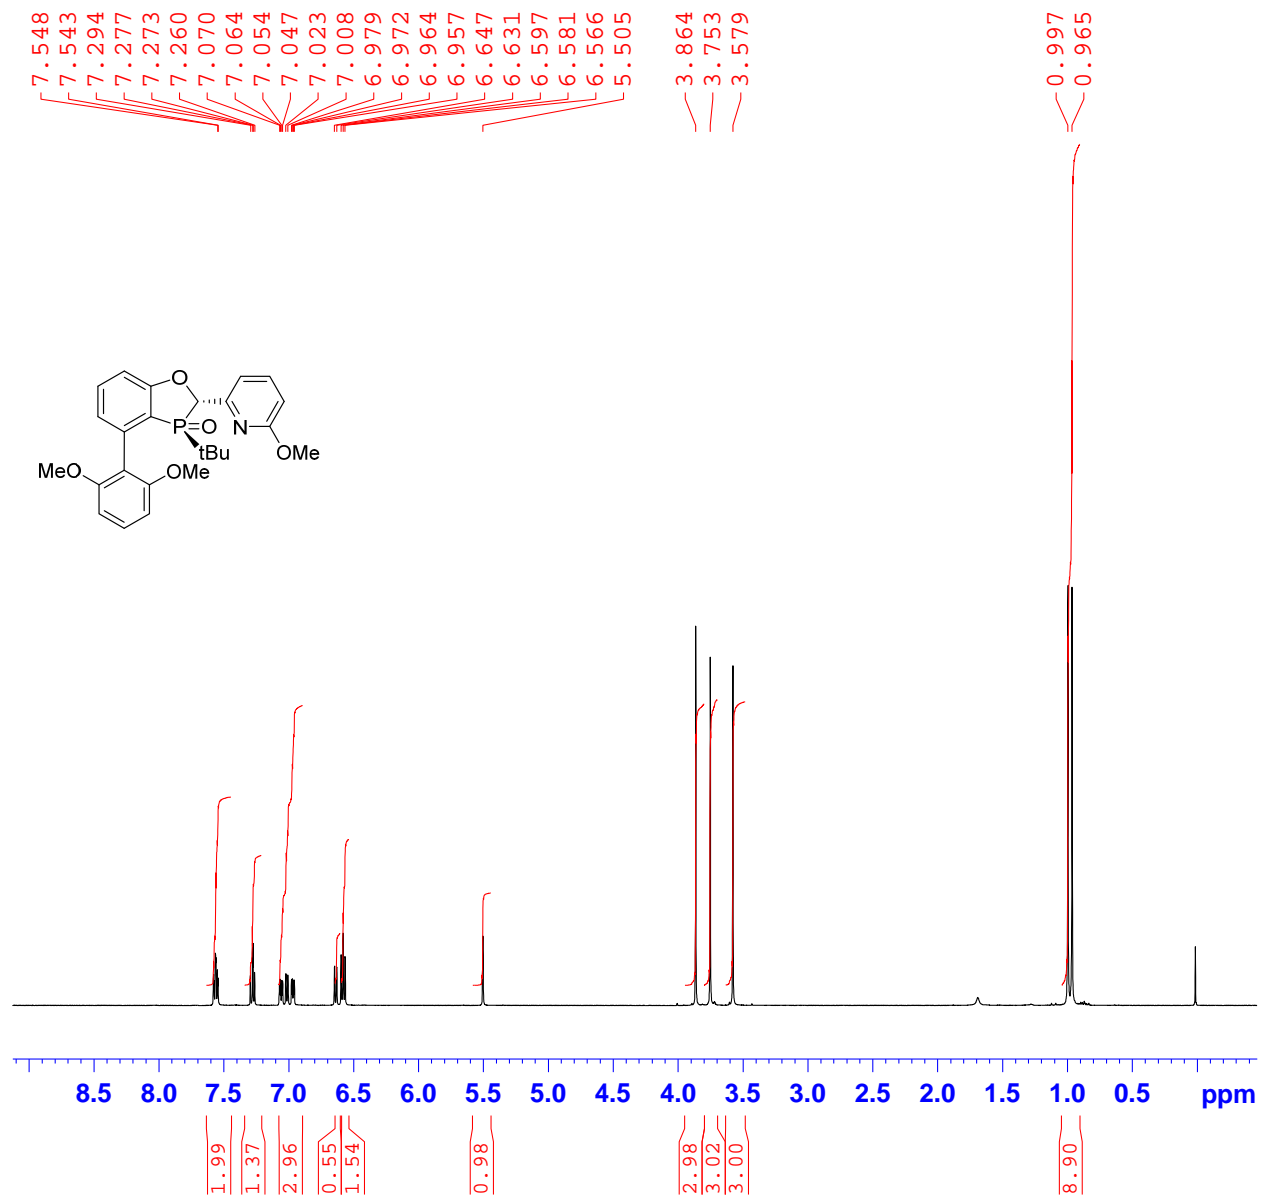

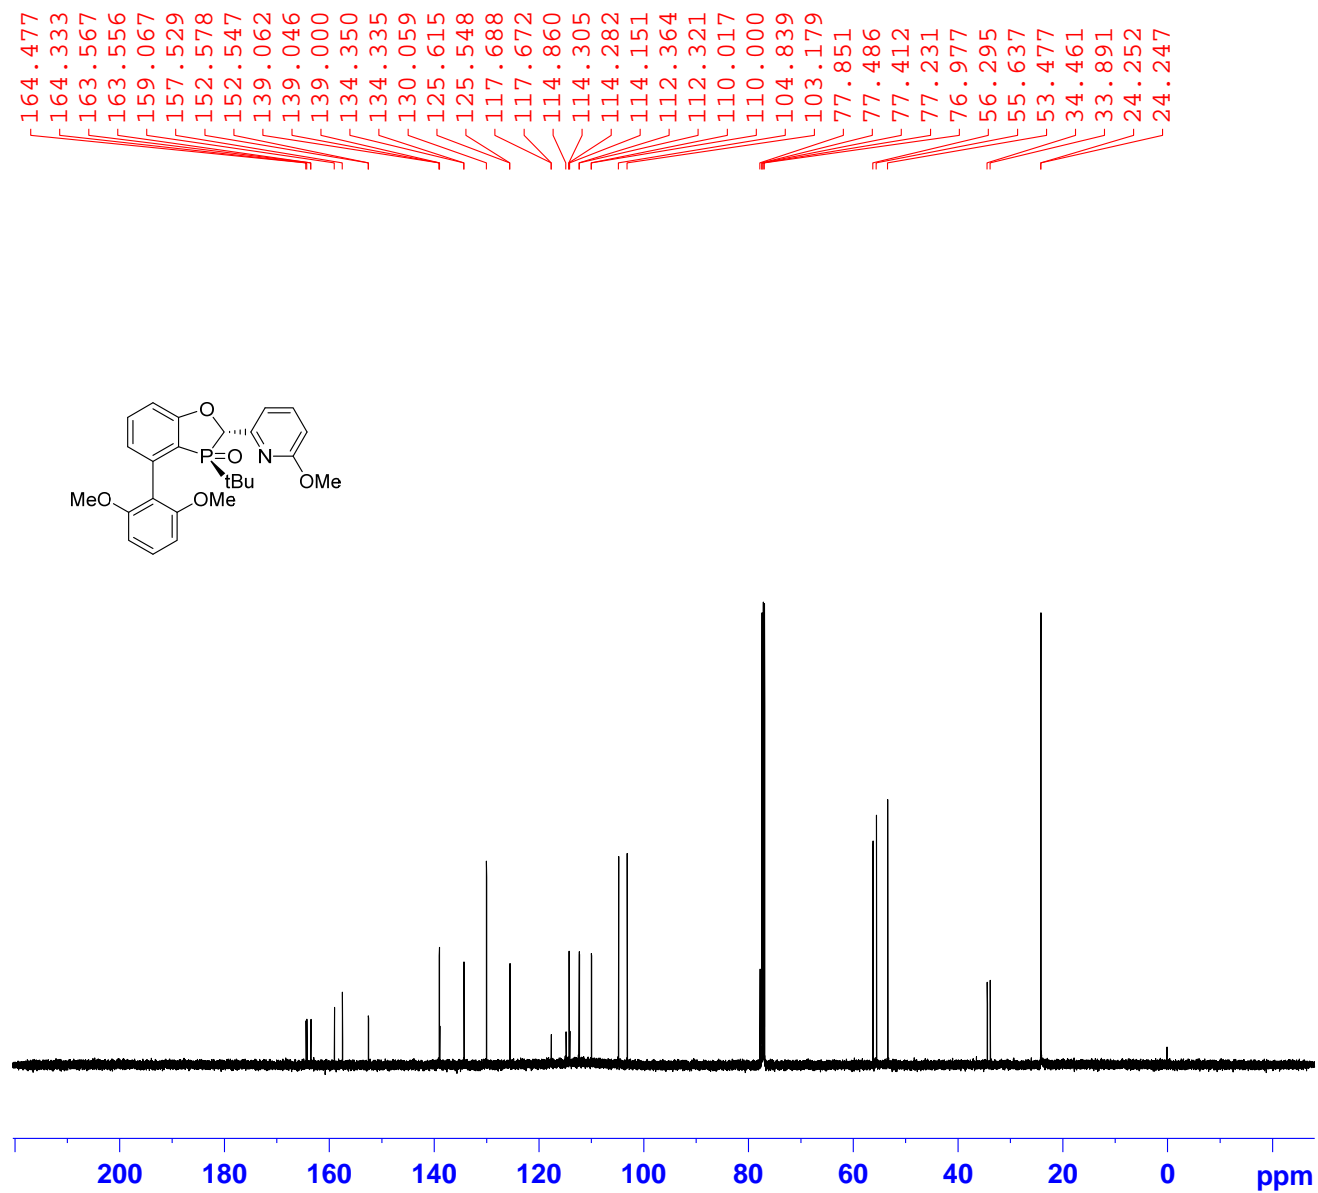

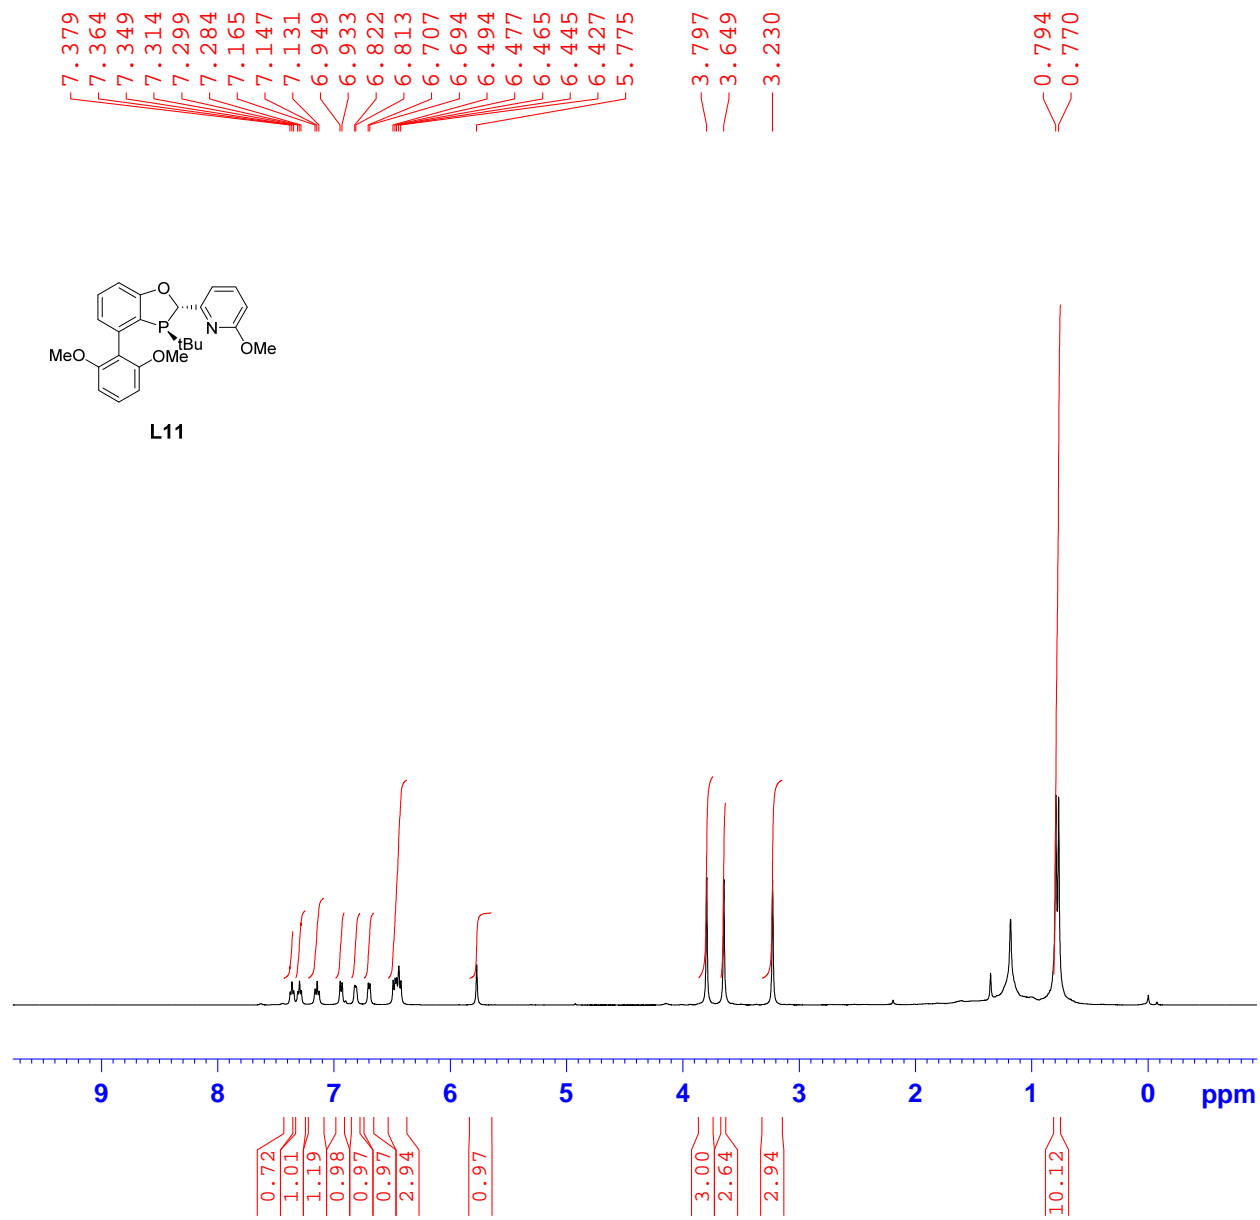

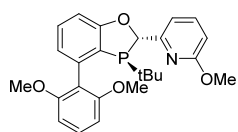

L11

164.125  
163.576  
159.260  
157.832  
157.228  
139.224  
139.084  
130.869  
129.202  
124.374  
124.343  
124.097  
111.799  
111.767  
109.411  
108.609  
108.589  
104.683  
103.735  
85.984  
85.760  
55.689  
55.670  
55.615  
53.342  
32.026  
31.856  
26.864  
26.746

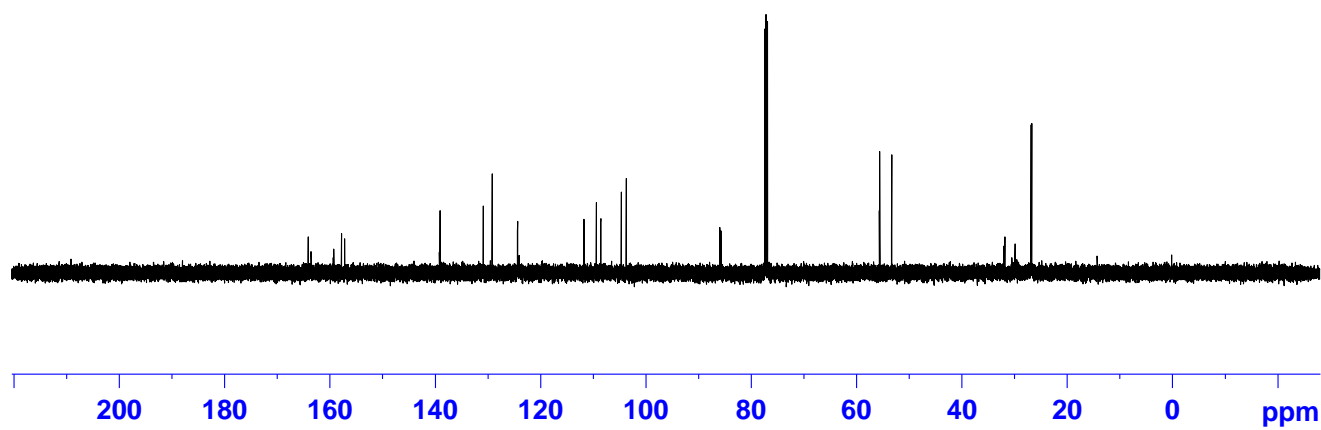

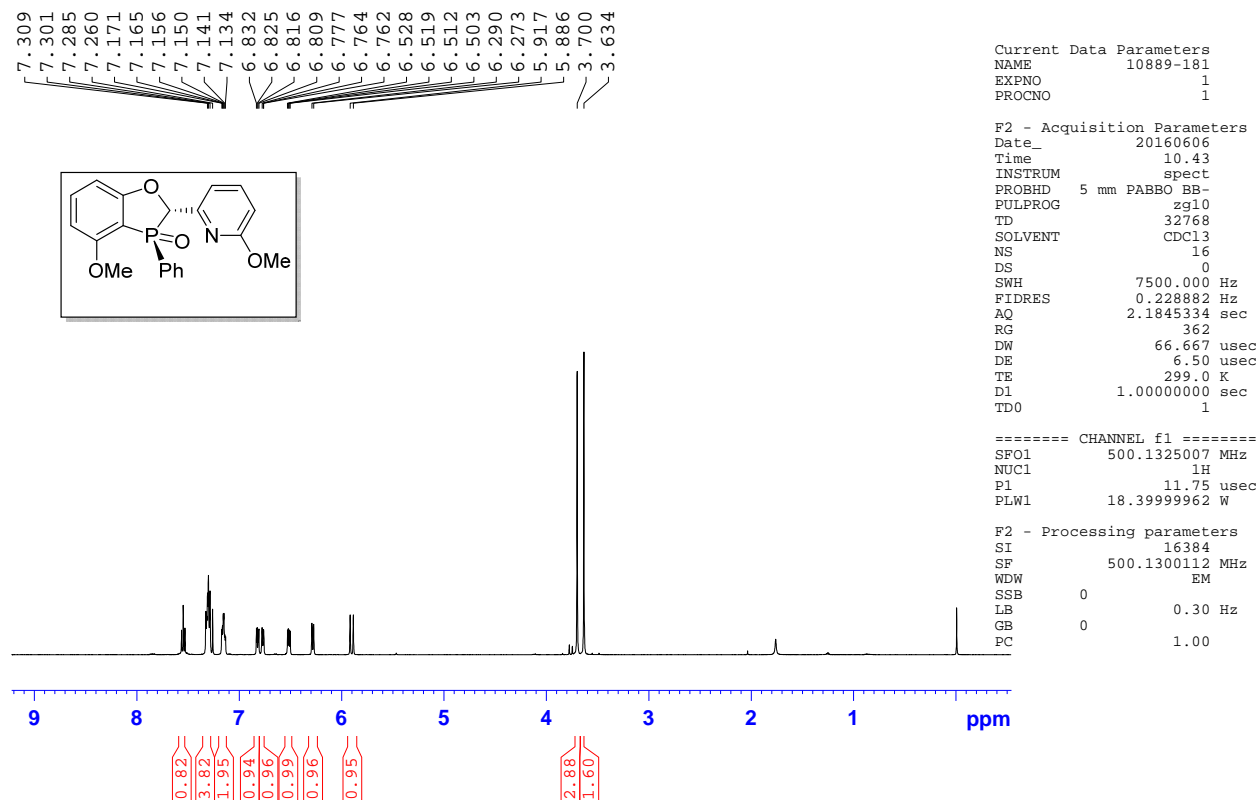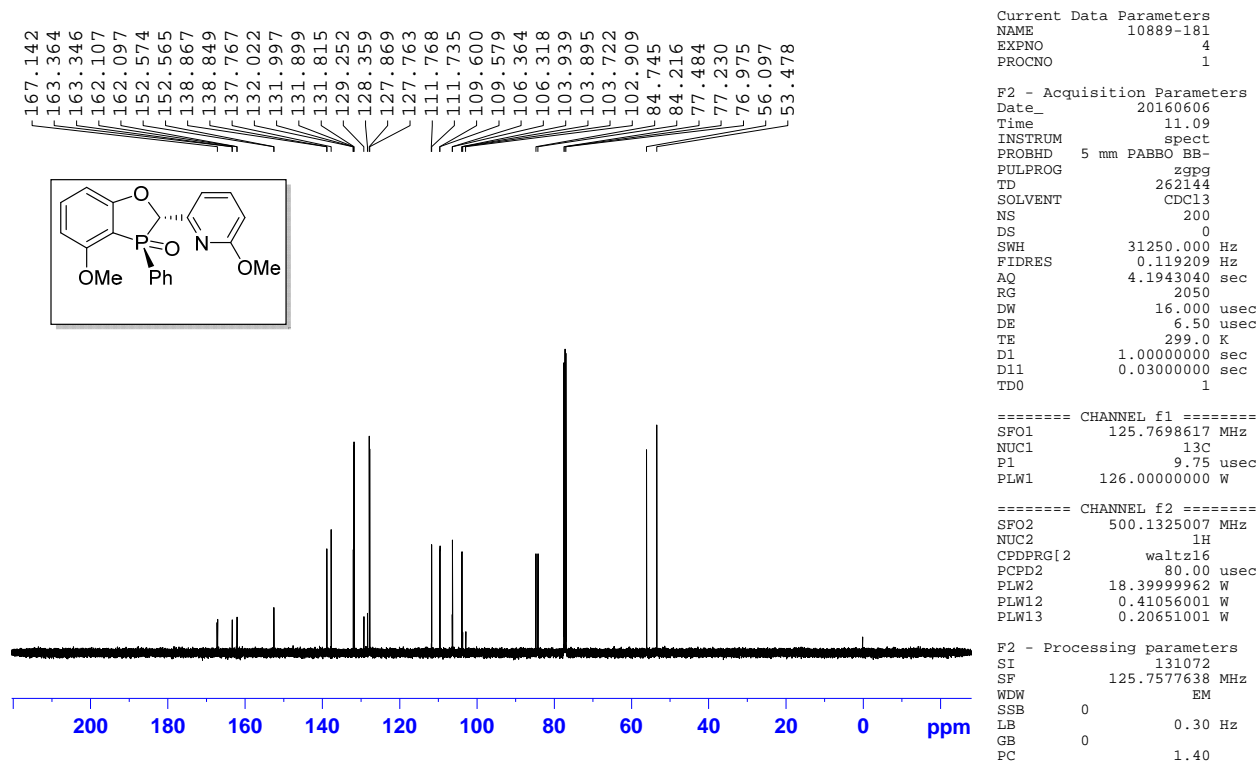

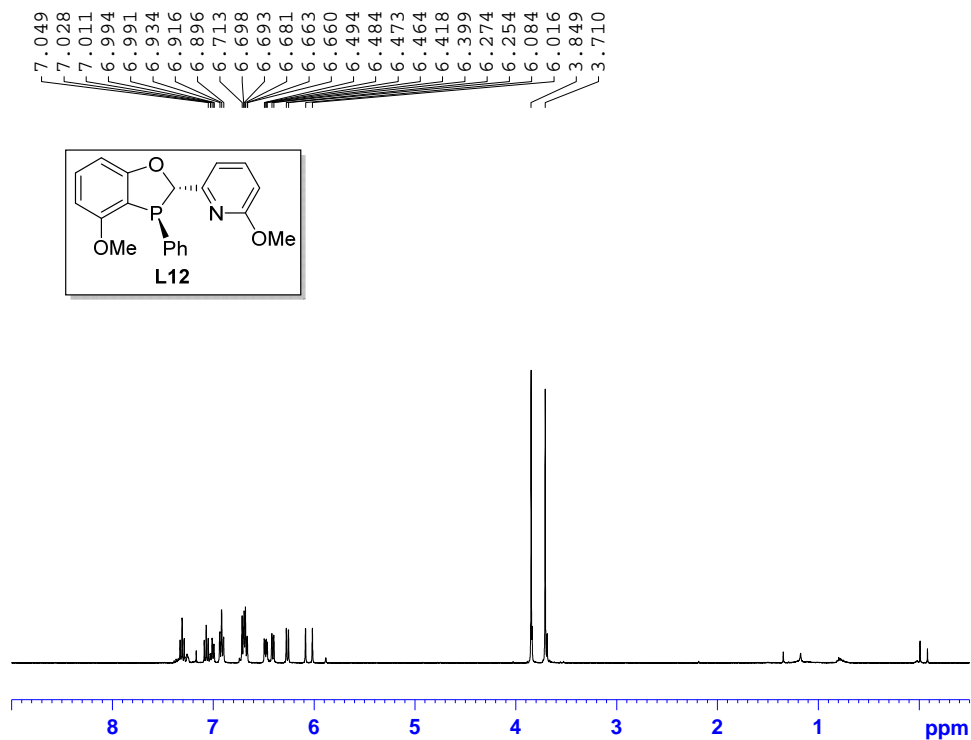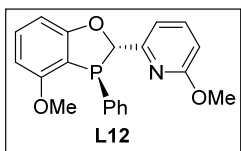

```
Current Data Parameters
NAME      10889-186
EXPNO    1
PROCNO   1

F2 - Acquisition Parameters
Date_    20160527
Time     11.17
INSTRUM spect
PROBHD   5 mm PABBO BB-
PULPROG zg10
TD       32768
SOLVENT  CDCl3
NS       4
DS       4
SWH      5896.227 Hz
FIDRES   0.179939 Hz
AQ       2.7787263 sec
RG       456
DW       84.800 usec
DE       6.50 usec
TE       298.0 K
D1       2.0000000 sec
TD0      1

===== CHANNEL f1 =====
SFO1     400.1327209 MHz
NUC1     1H
P1       15.00 usec
PLW1     10.5000000 W

F2 - Processing parameters
SI       65536
SF       400.1300462 MHz
WDW      EM
SSB      0
LB       0.05 Hz
GB       0
PC       1.00
```

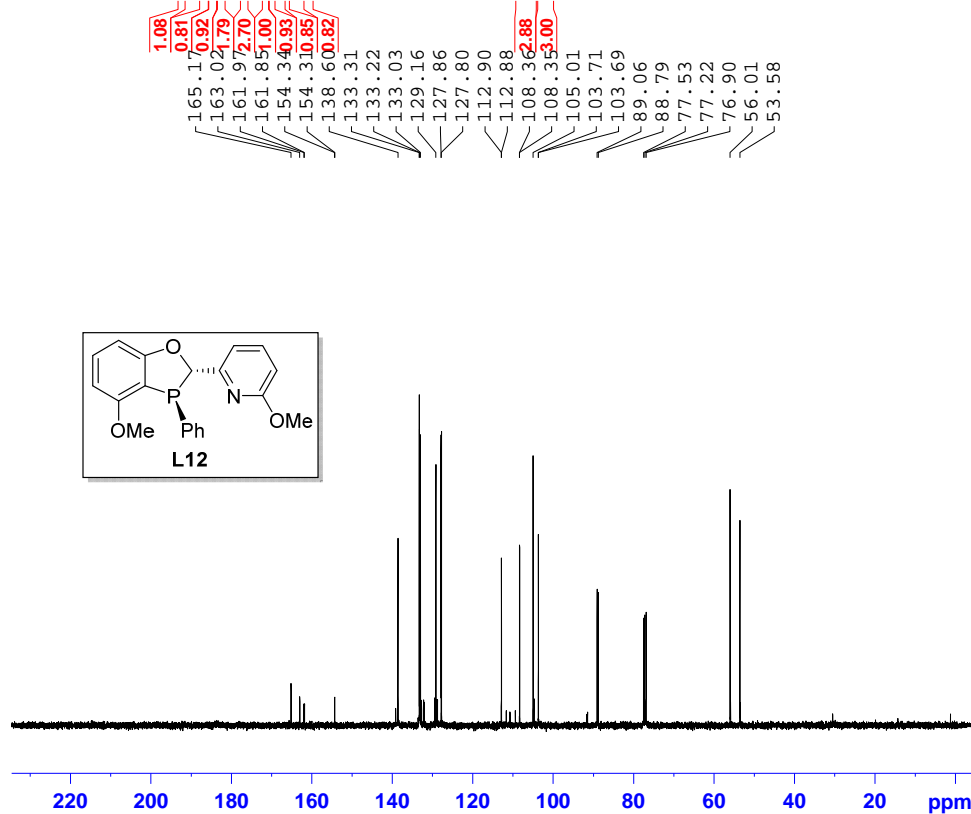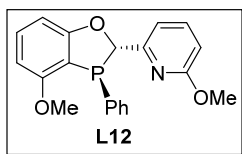

```
Current Data Parameters
NAME      10889-186
EXPNO    4
PROCNO   1

F2 - Acquisition Parameters
Date_    20160527
Time     11.54
INSTRUM spect
PROBHD   5 mm PABBO BB-
PULPROG zgpg
TD       32768
SOLVENT  CDCl3
NS       4
DS       4
SWH      24038.461 Hz
FIDRES   0.733596 Hz
AQ       0.6815744 sec
RG       912
DW       20.800 usec
DE       6.50 usec
TE       298.0 K
D1       2.0000000 sec
D11      0.03000000 sec
TD0      1

===== CHANNEL f1 =====
SFO1     100.6243395 MHz
NUC1     13C
P1       10.90 usec
PLW1     43.0000000 W

===== CHANNEL f2 =====
SFO2     400.1316005 MHz
NUC2     1H
CPDPRG[2] waltz16
PCPD2    90.00 usec
PLW2     10.5000000 W
PLW12    0.29166999 W
PLW13    0.14670999 W

F2 - Processing parameters
SI       65536
SF       100.6127503 MHz
WDW      EM
SSB      0
LB       1.00 Hz
GB       0
PC       1.40
```

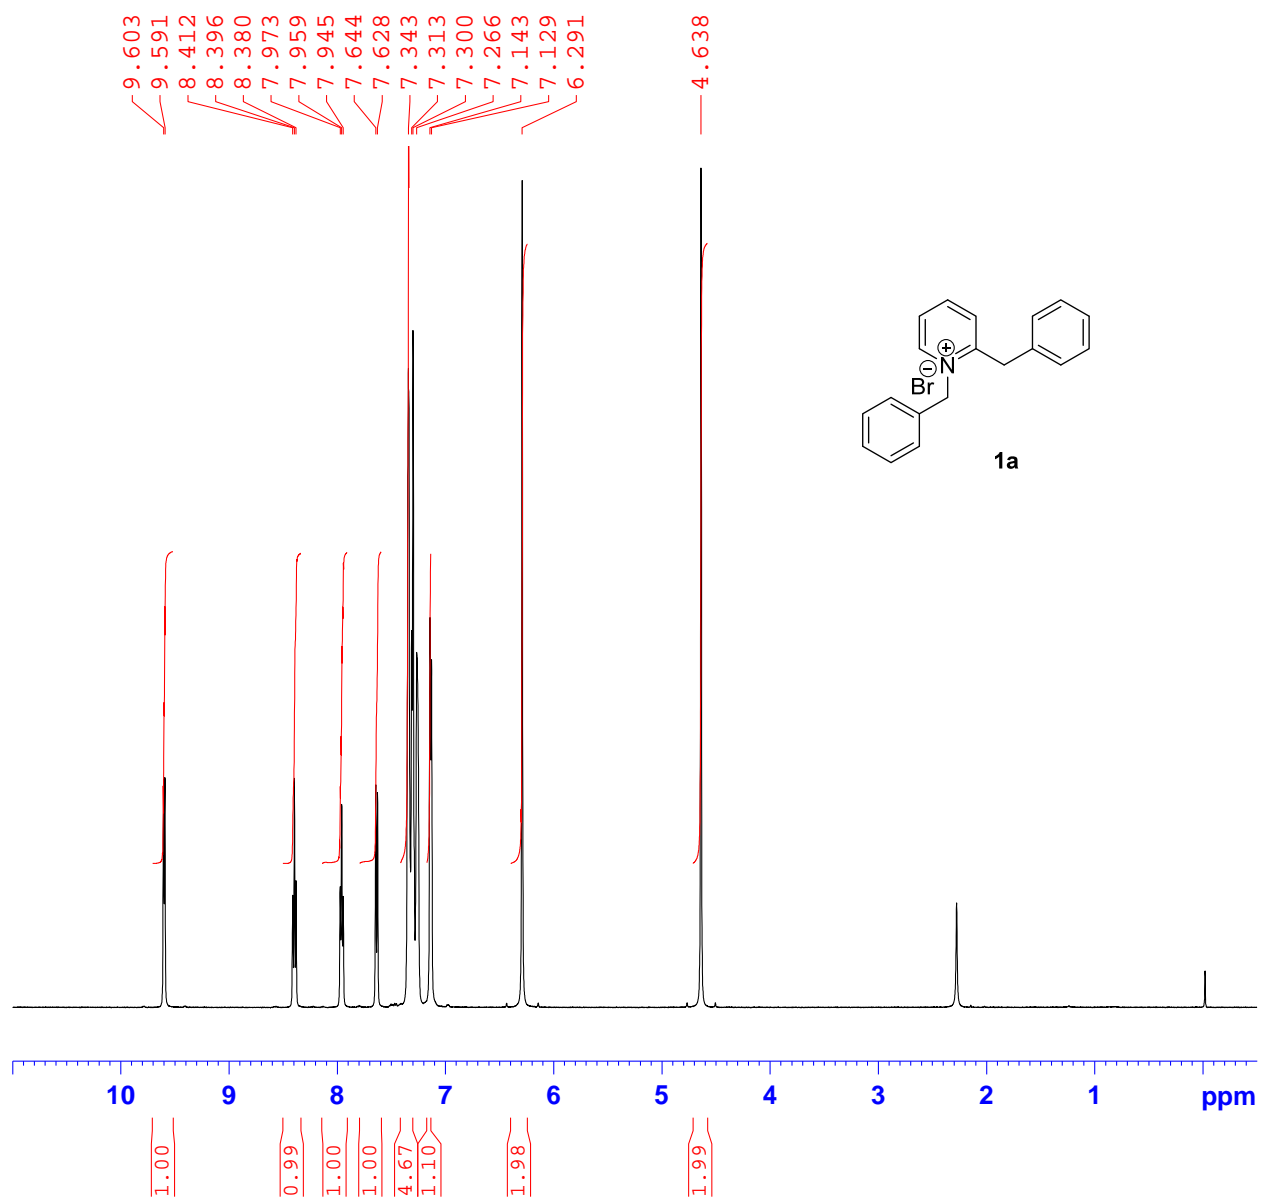

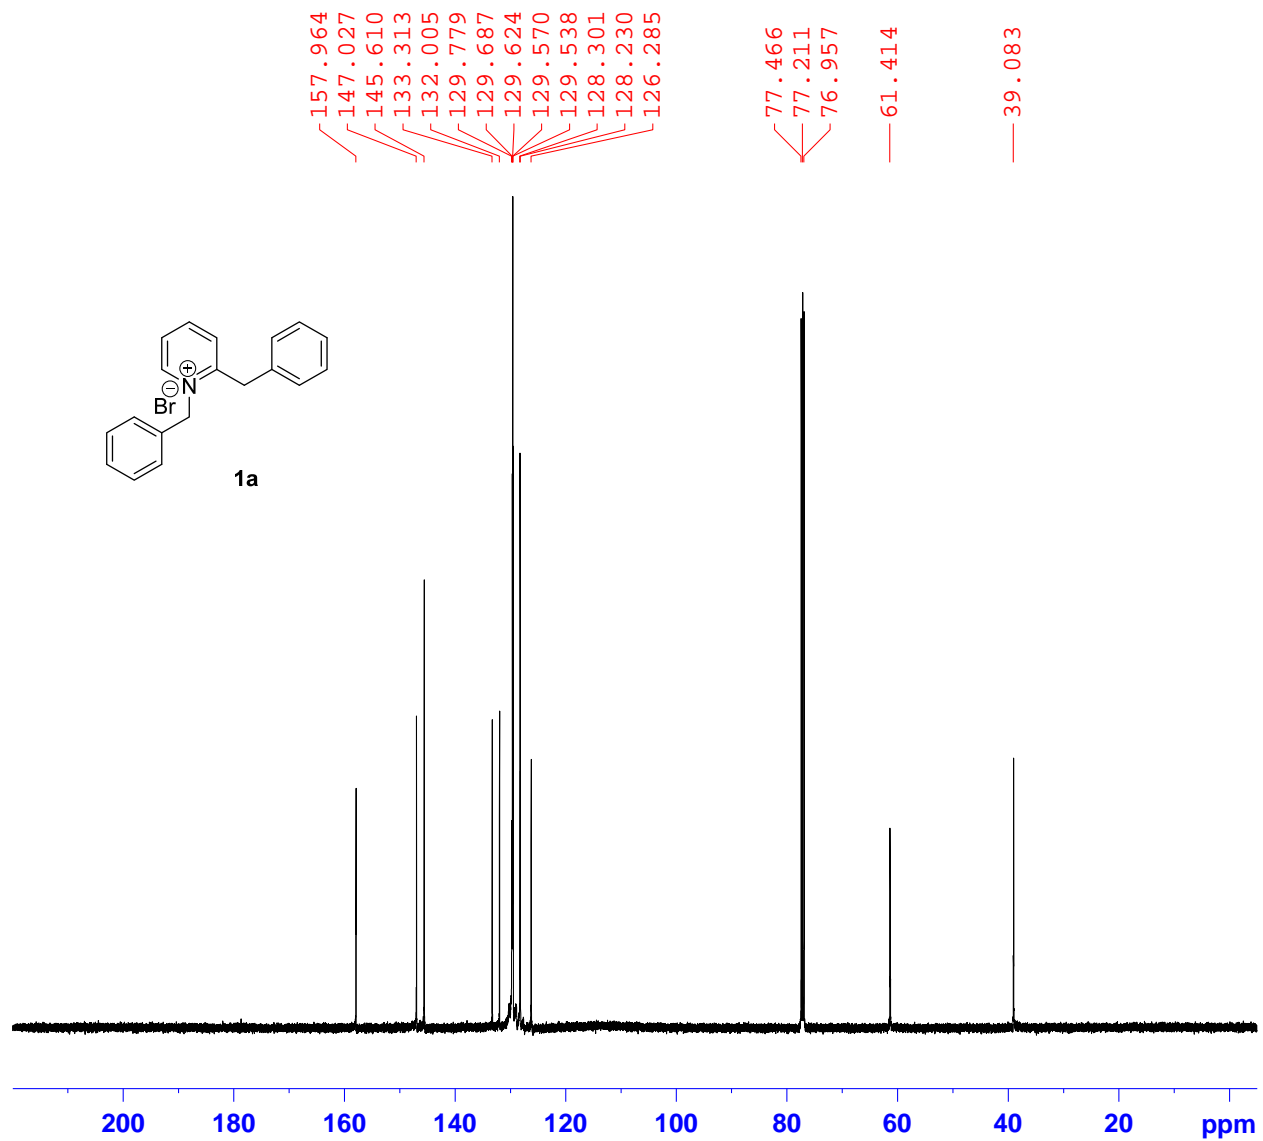



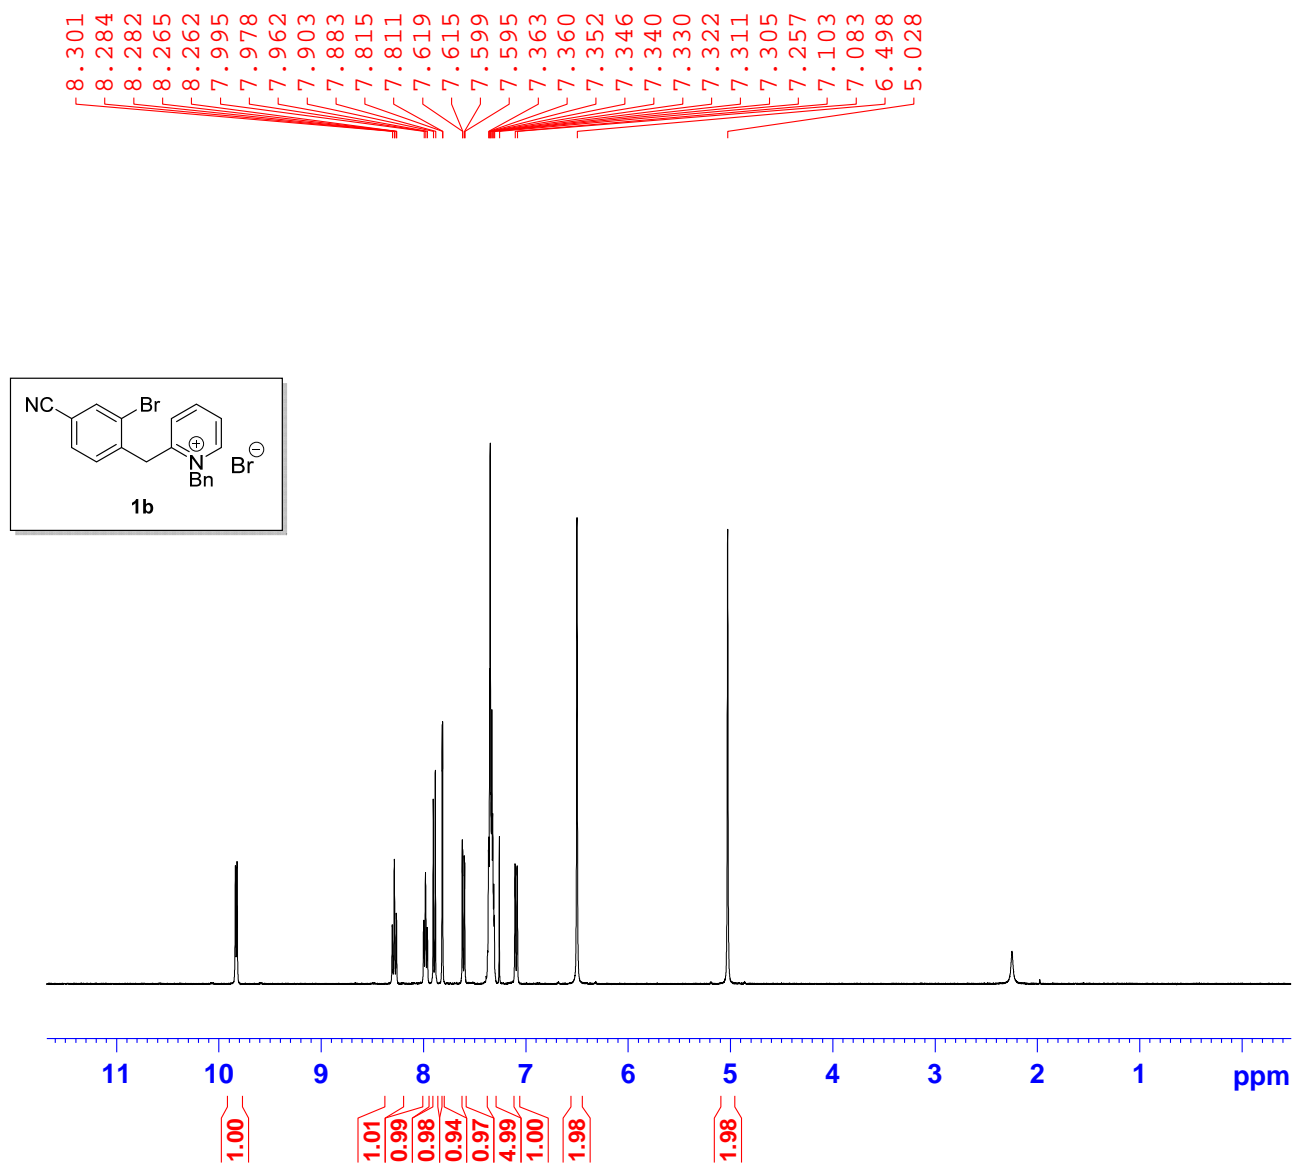

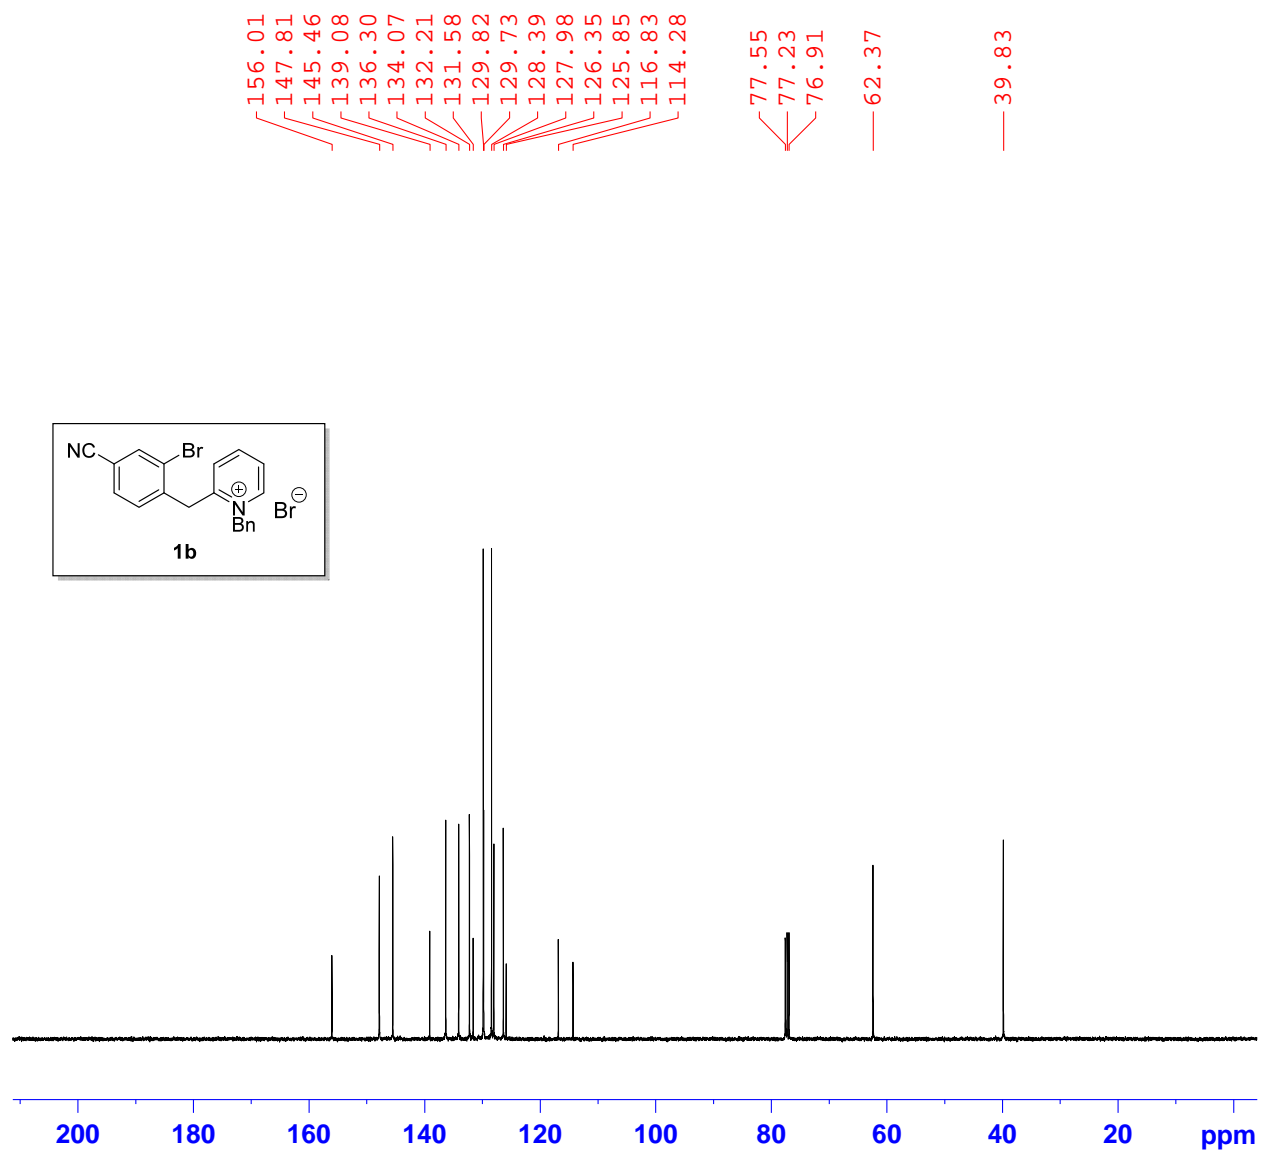

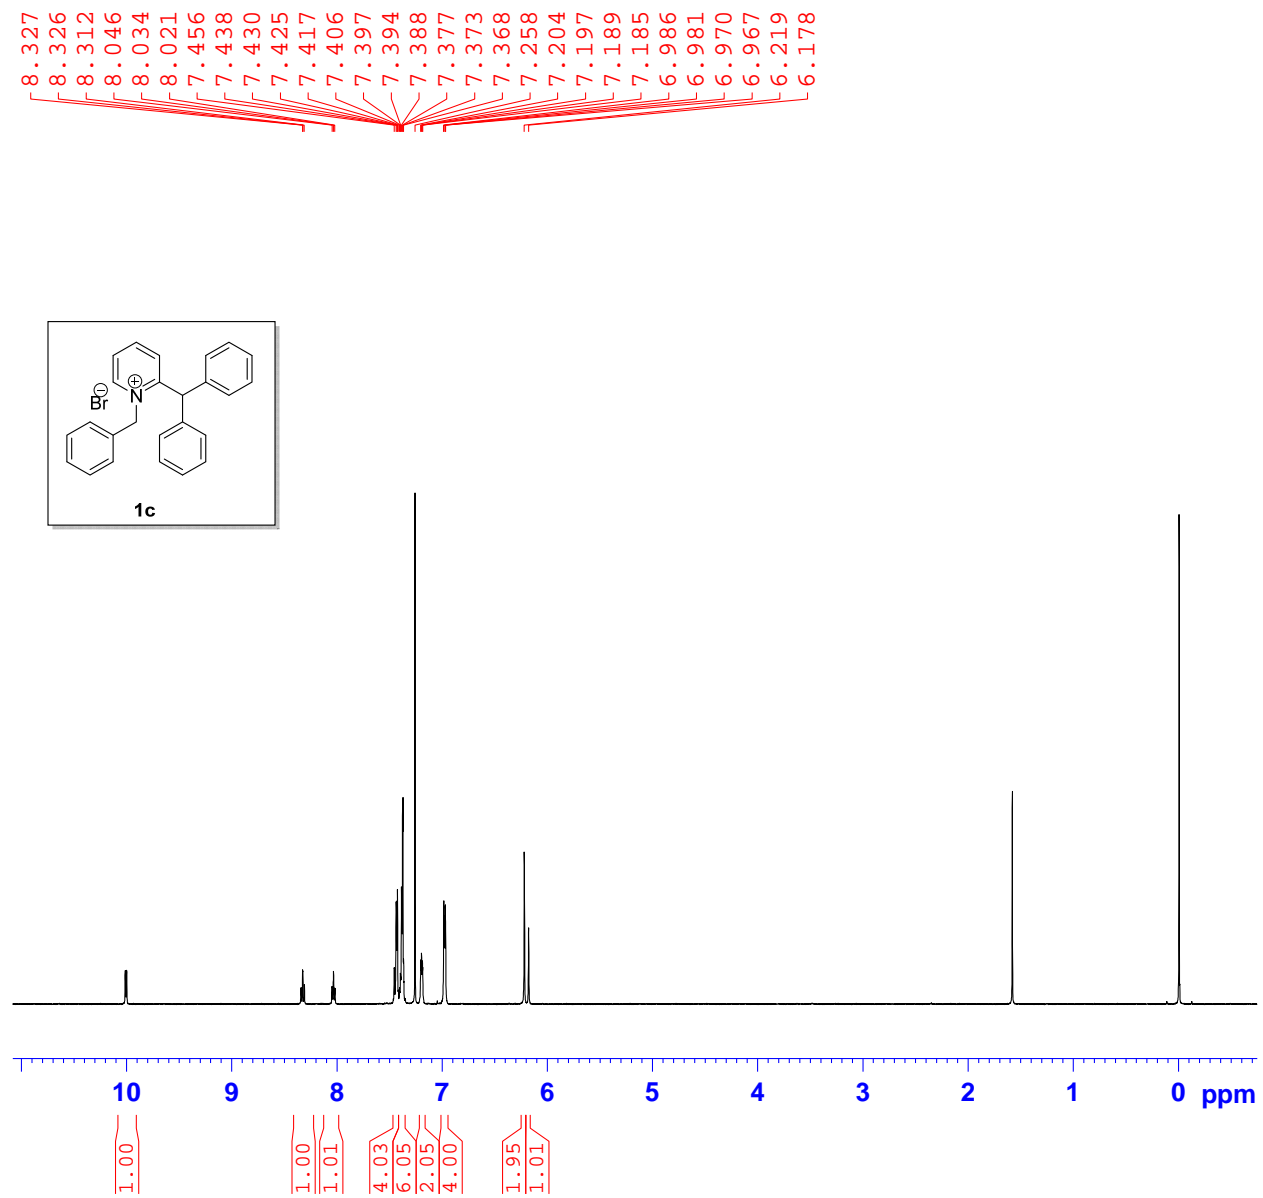

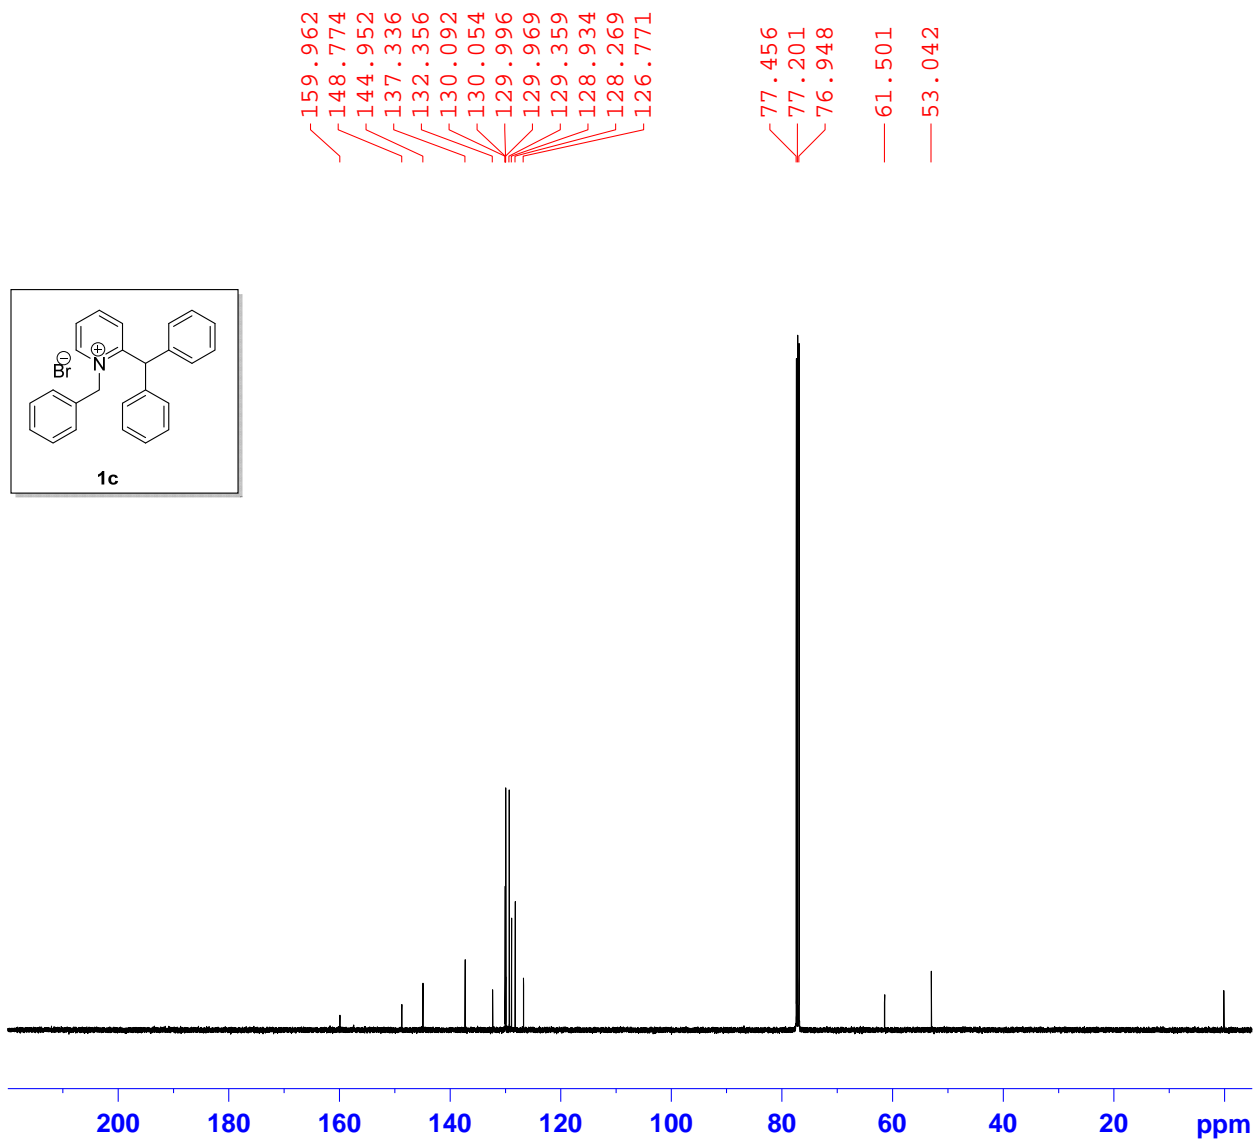

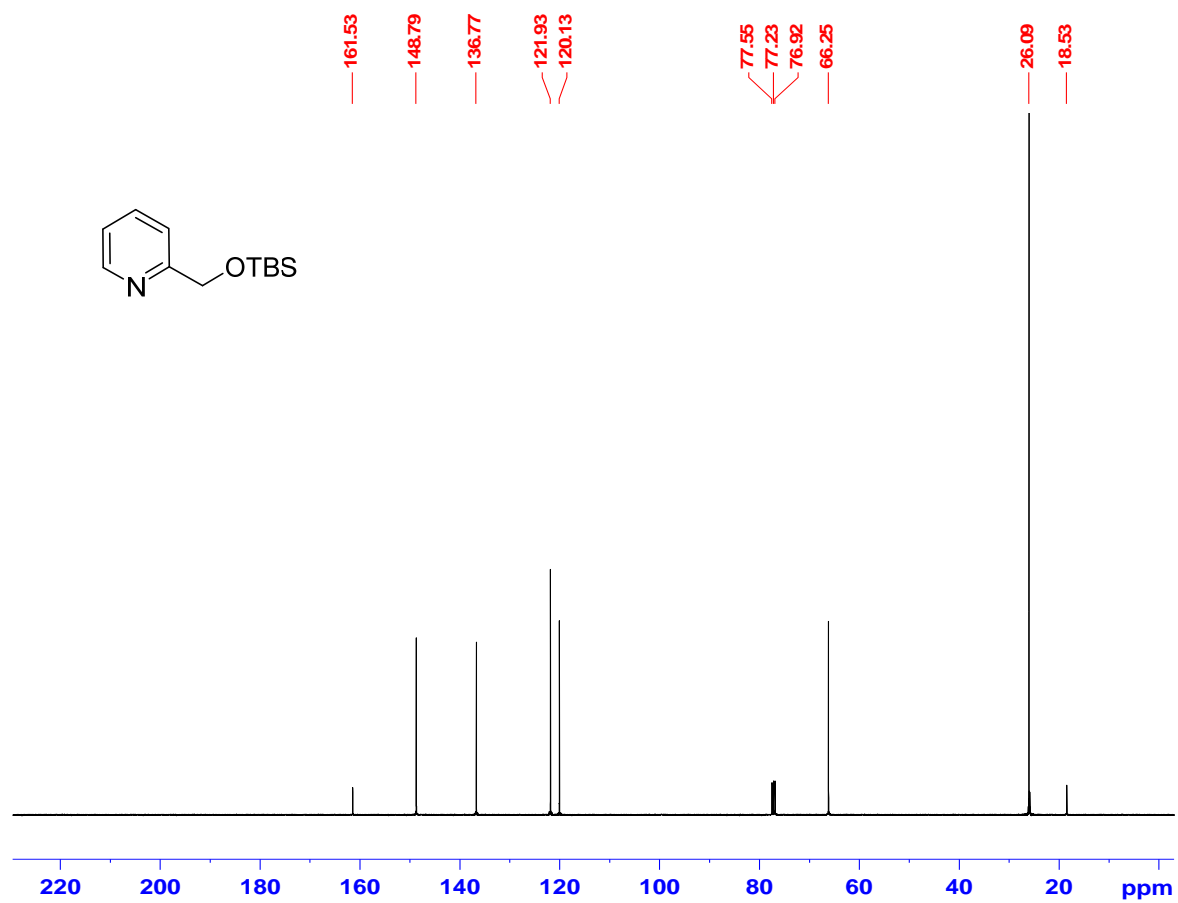

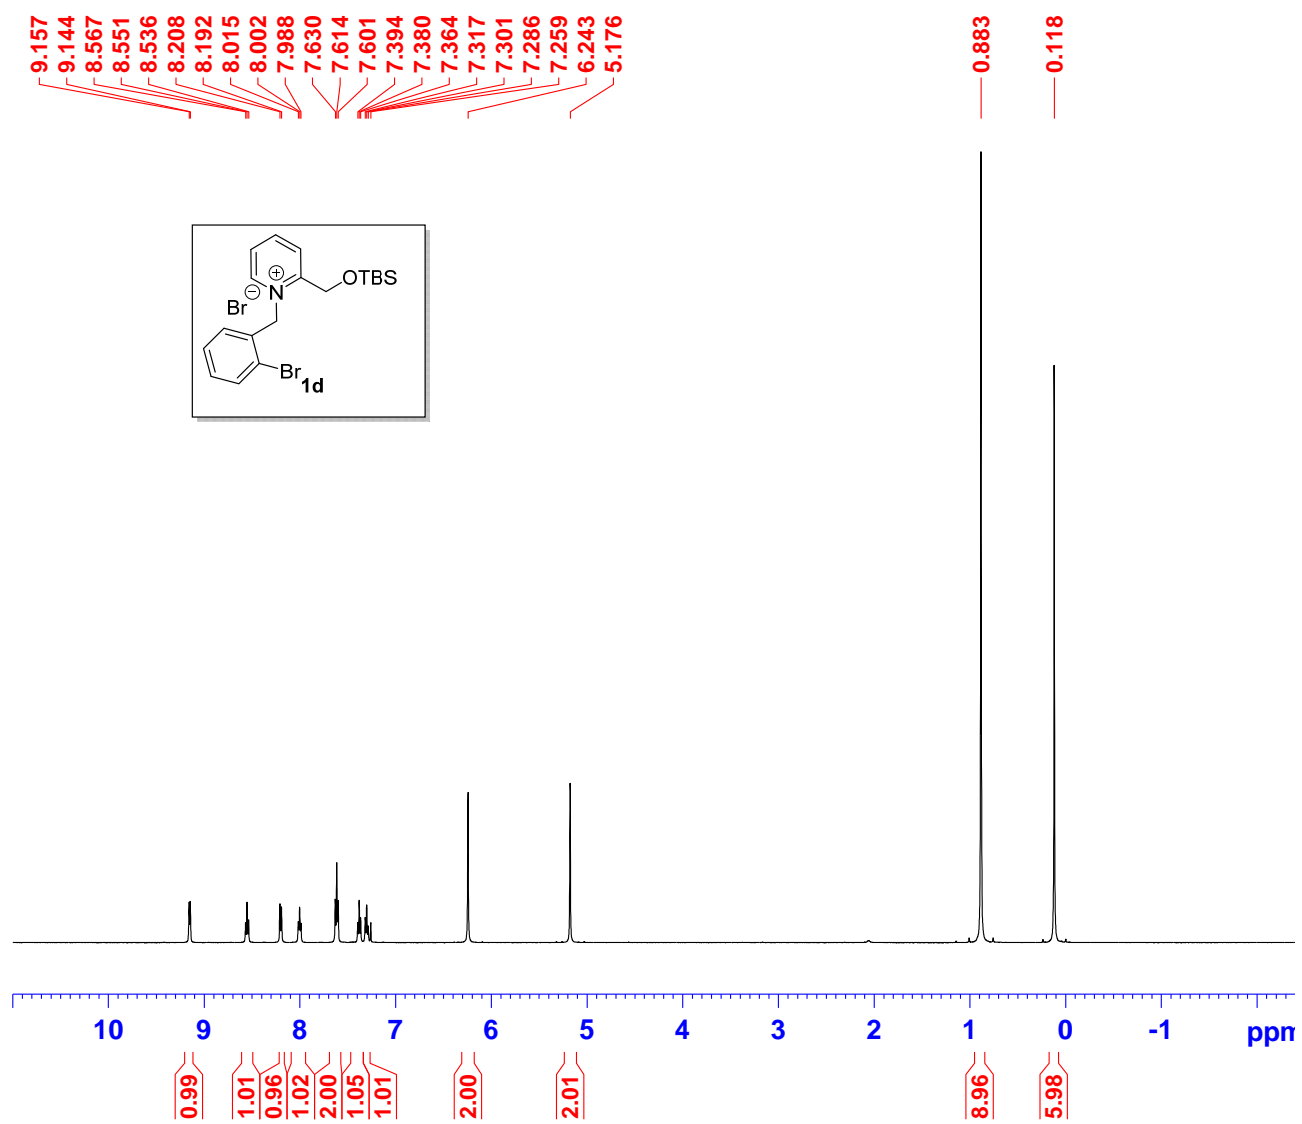

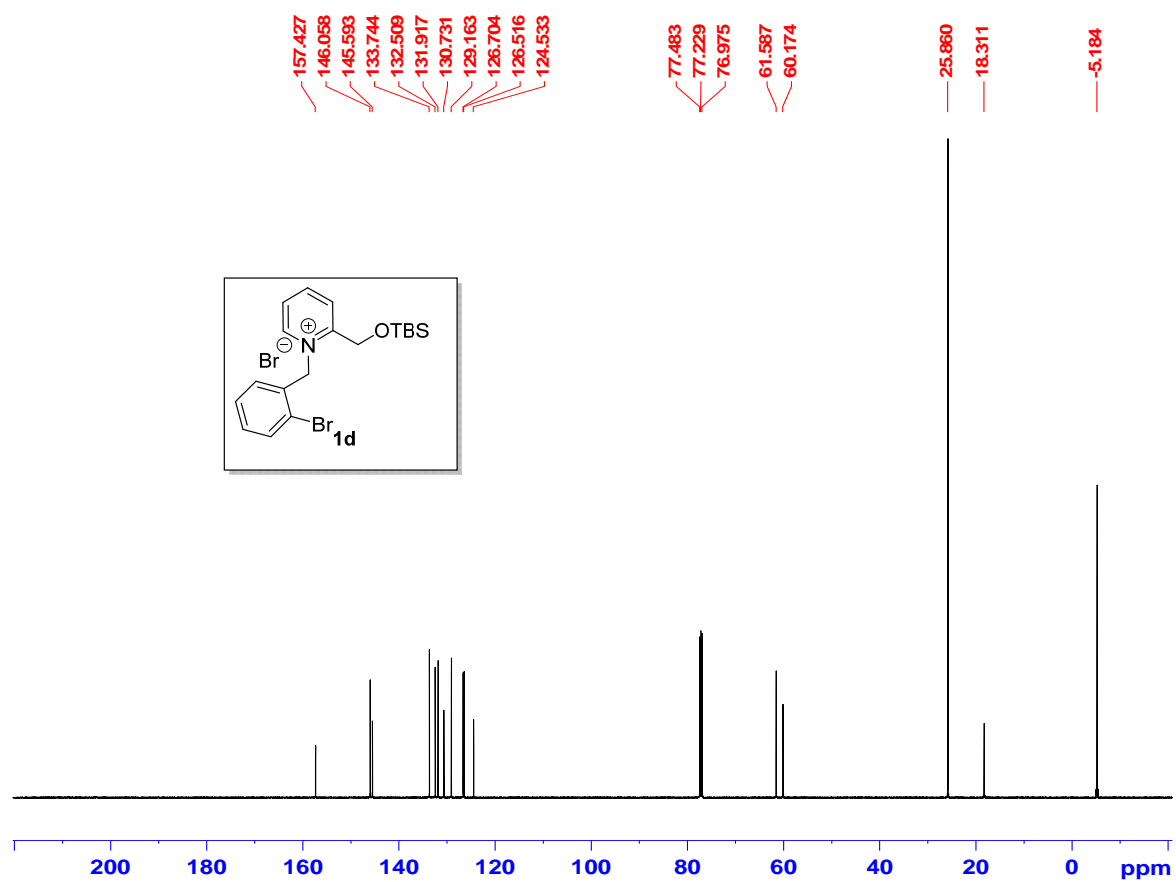

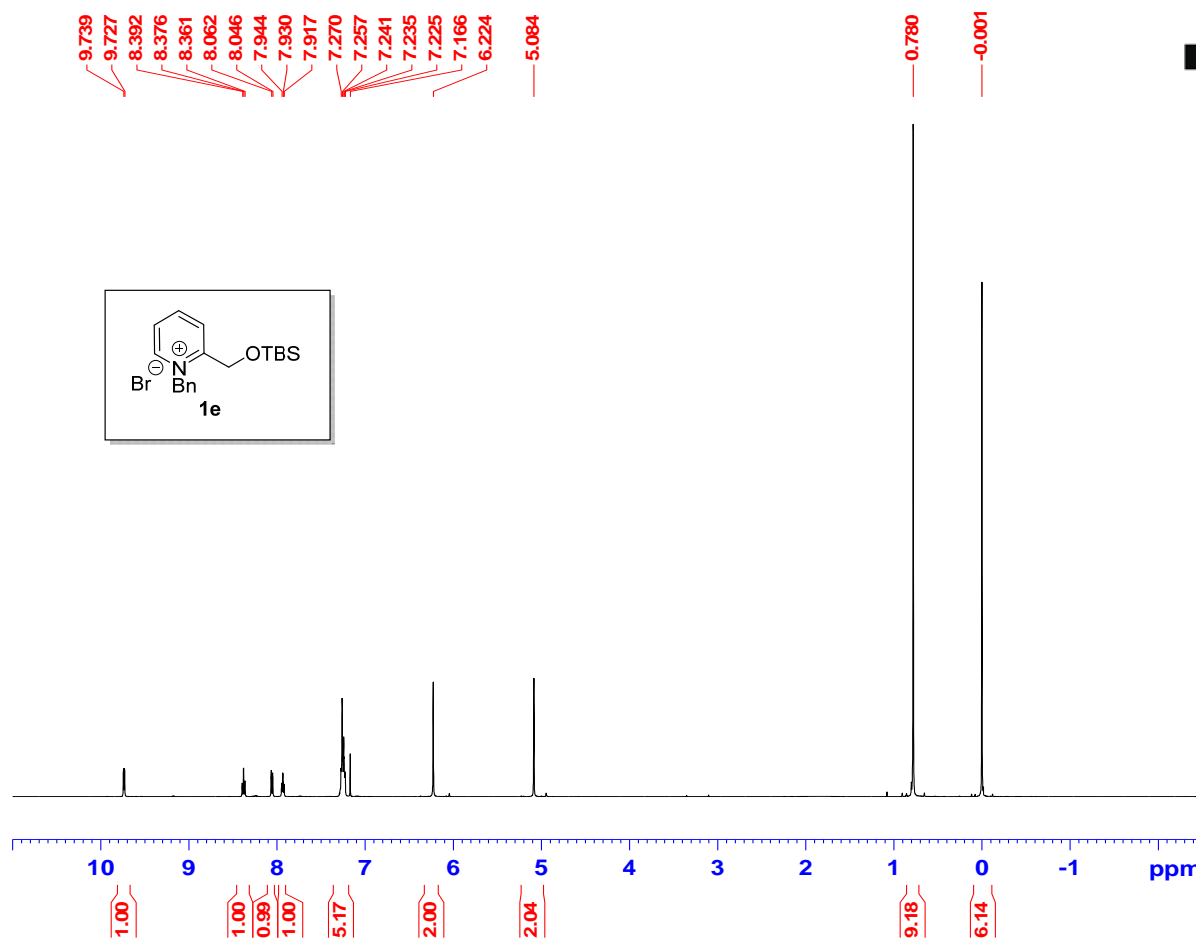



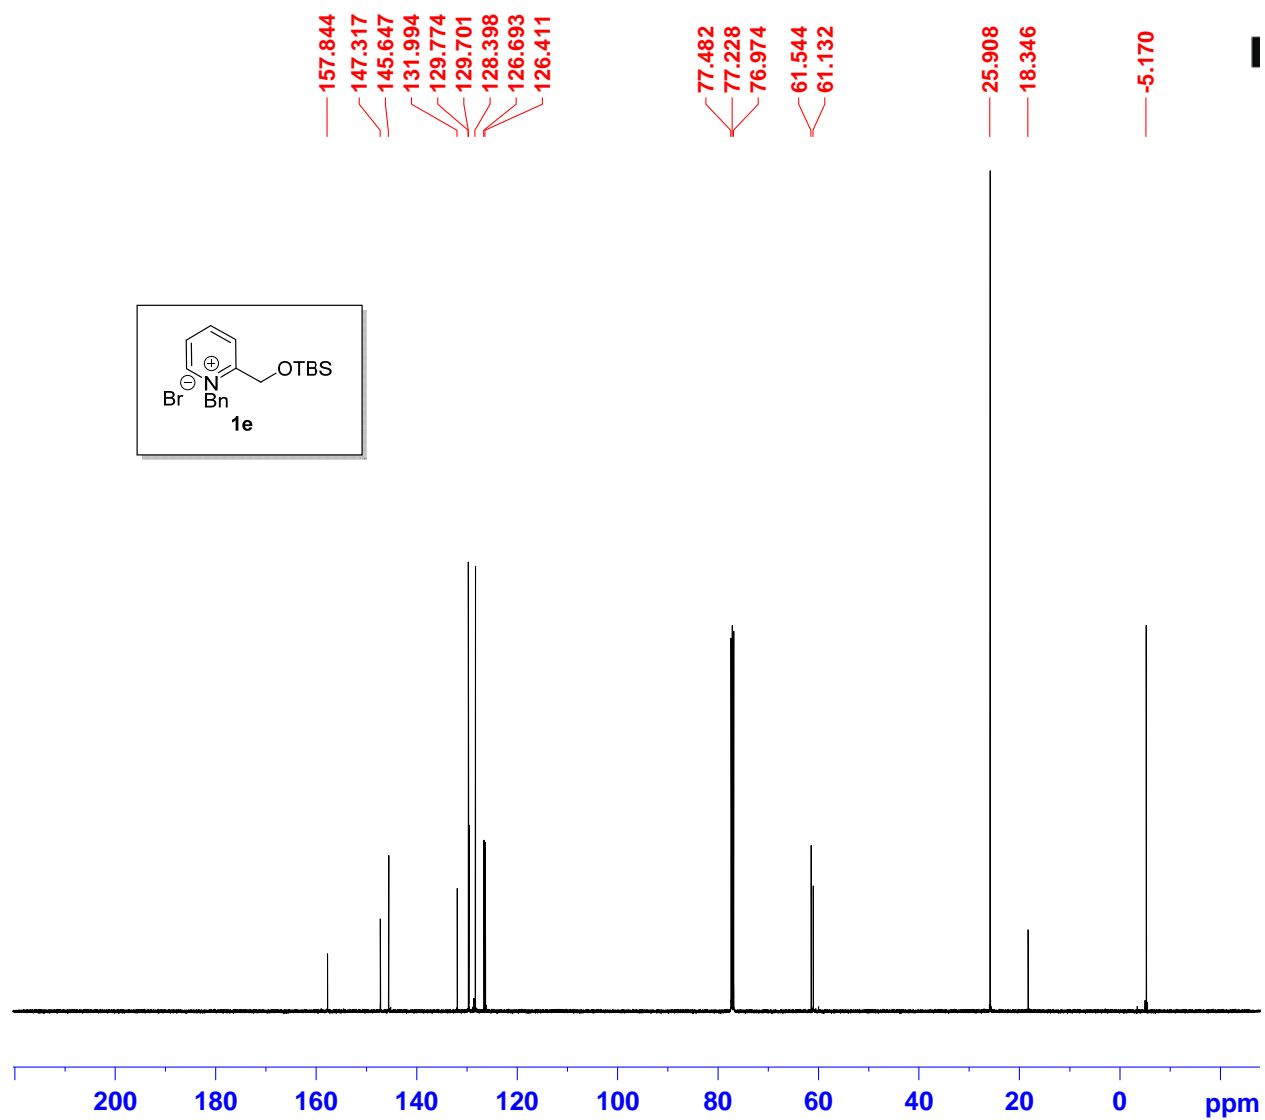

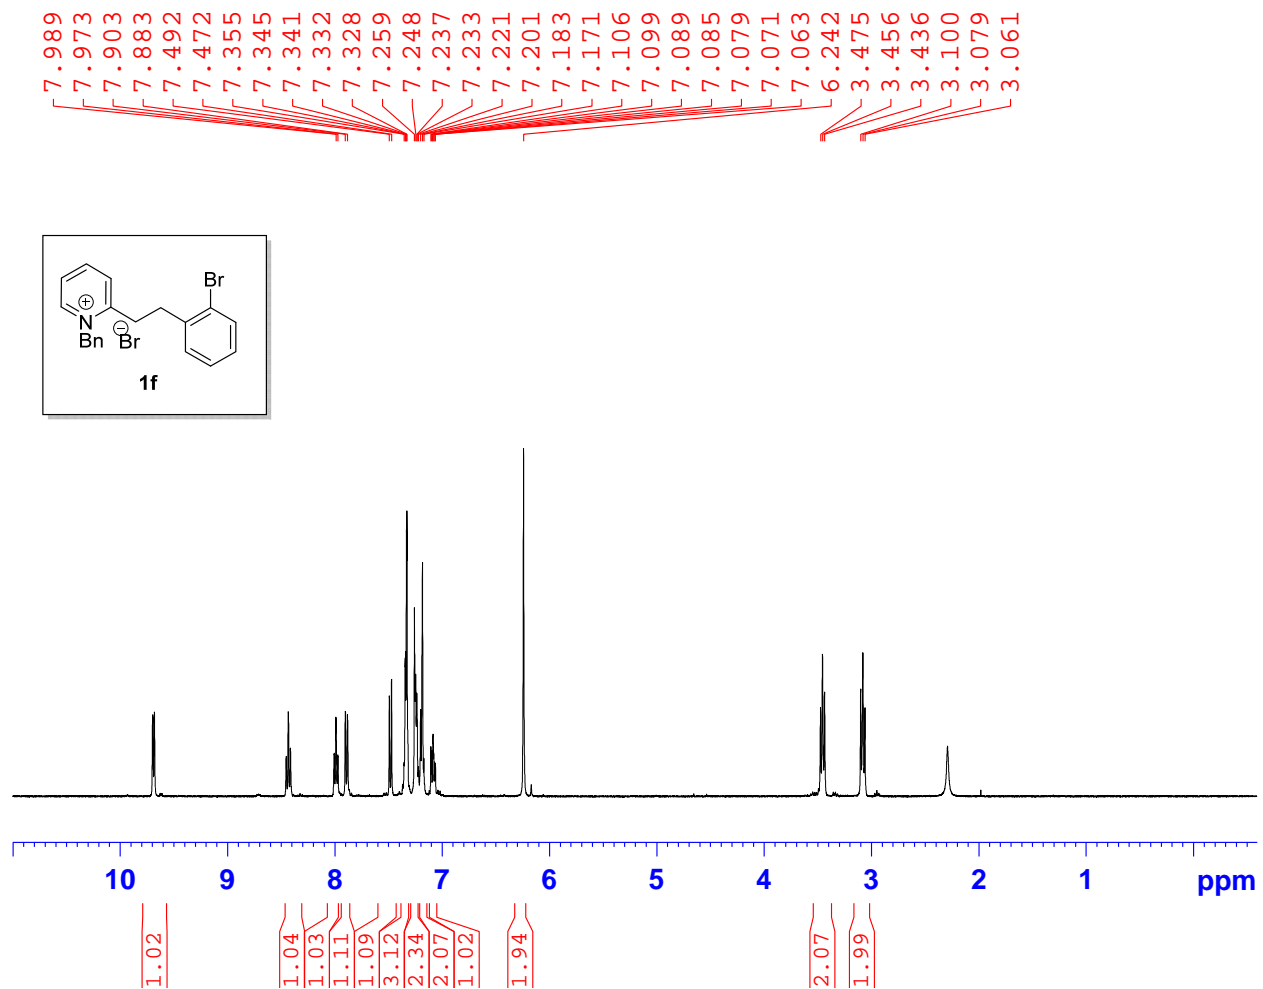

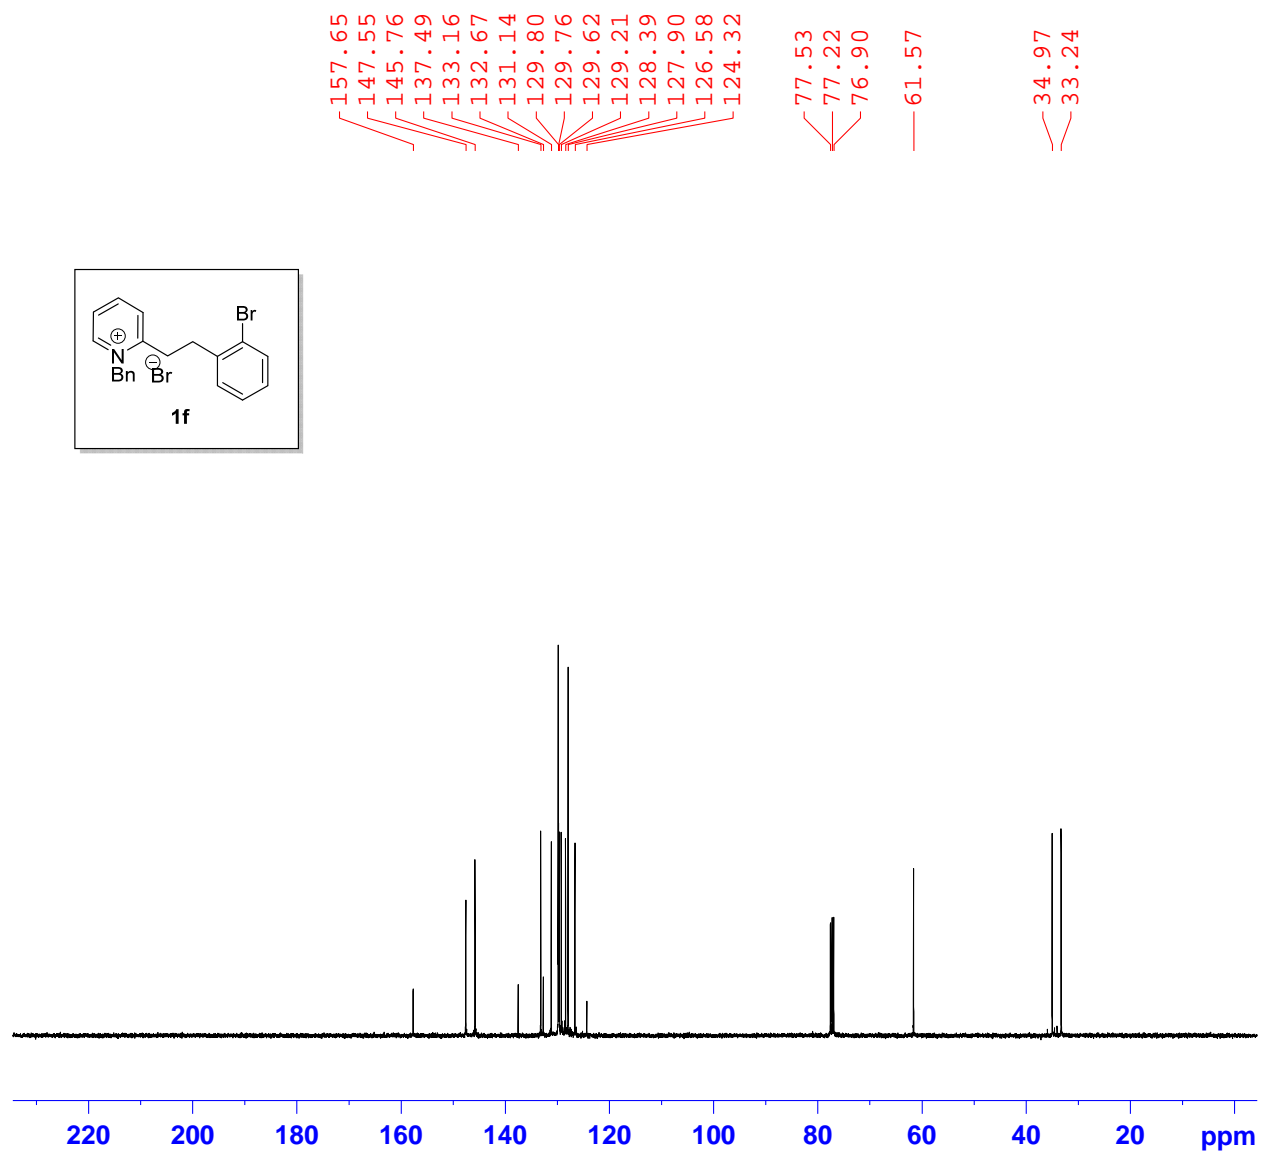

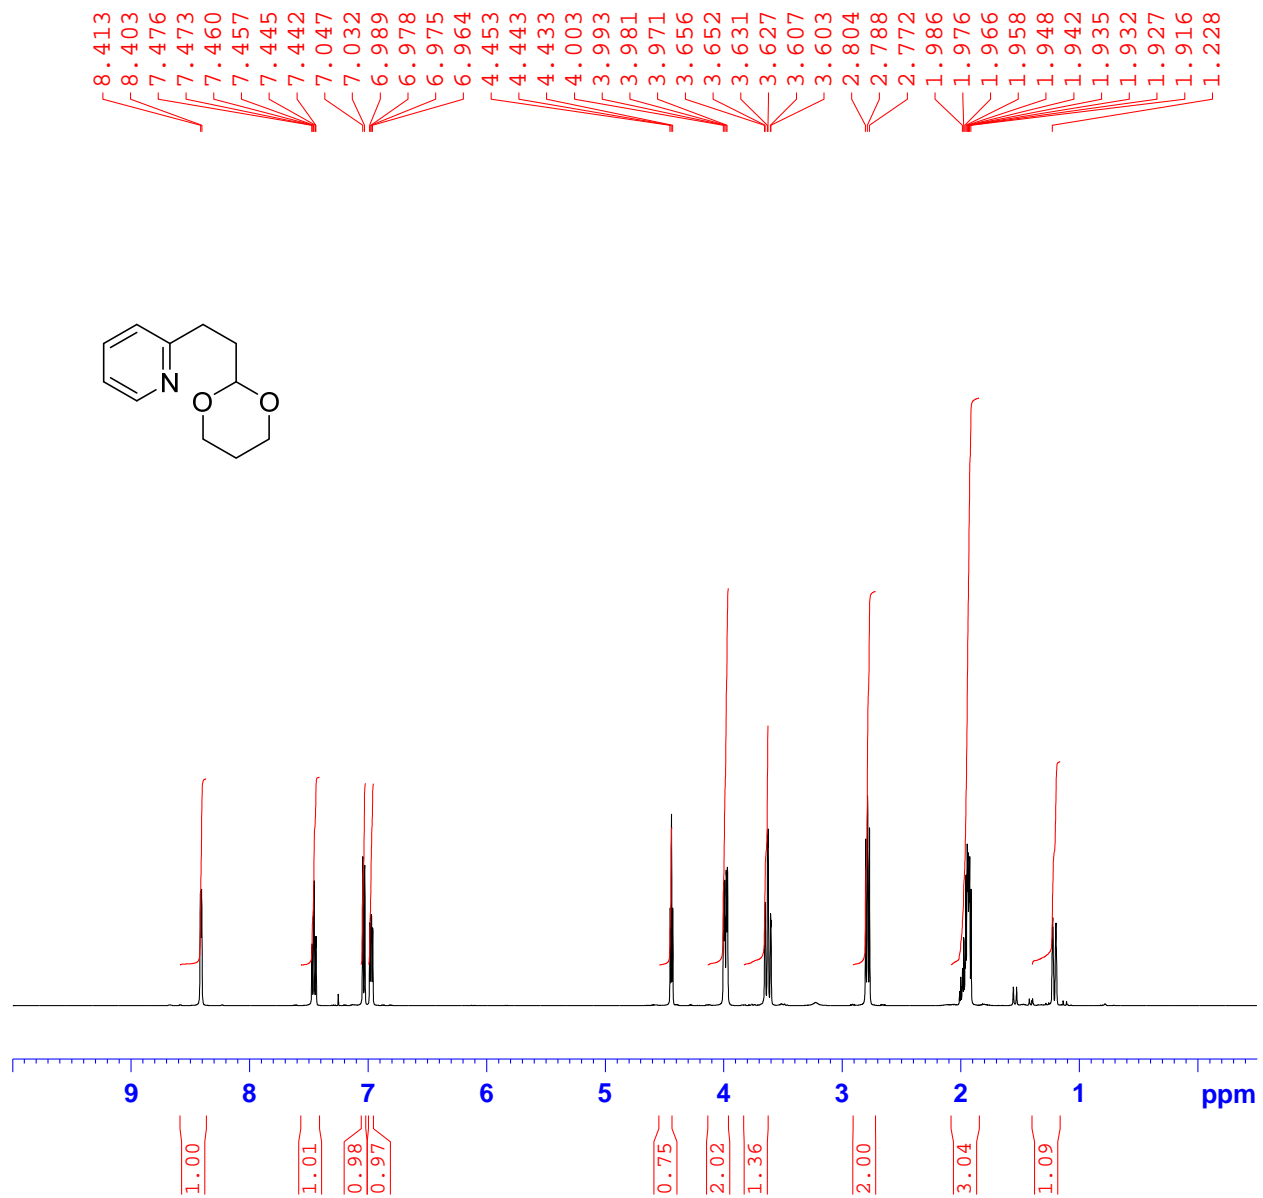

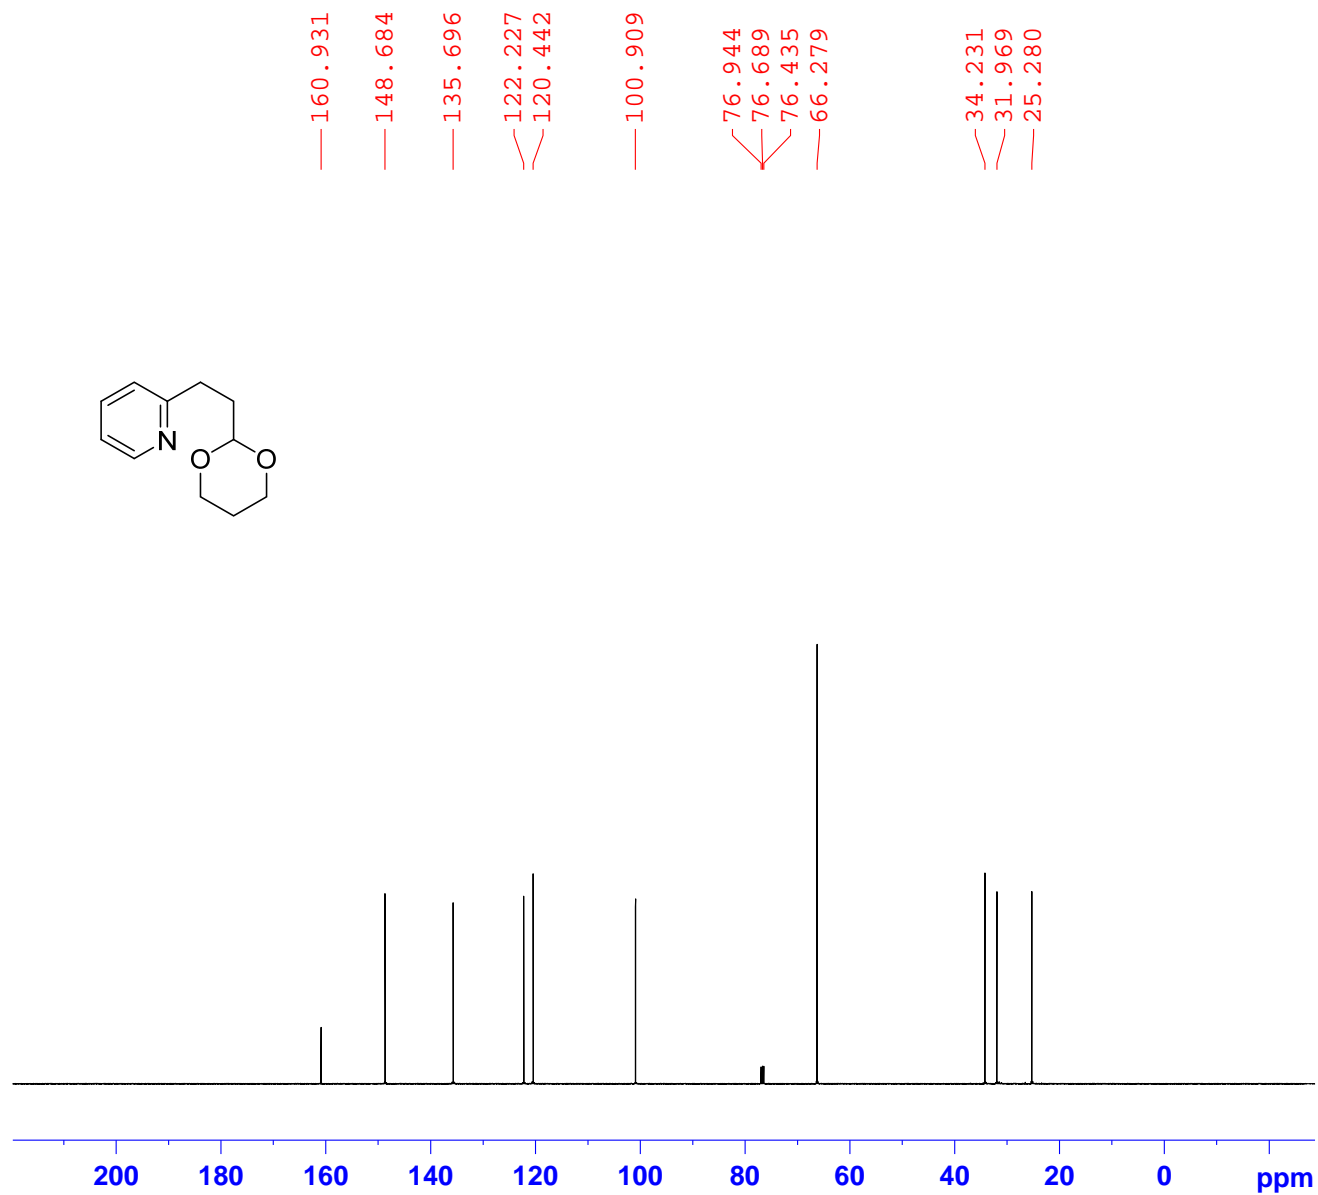

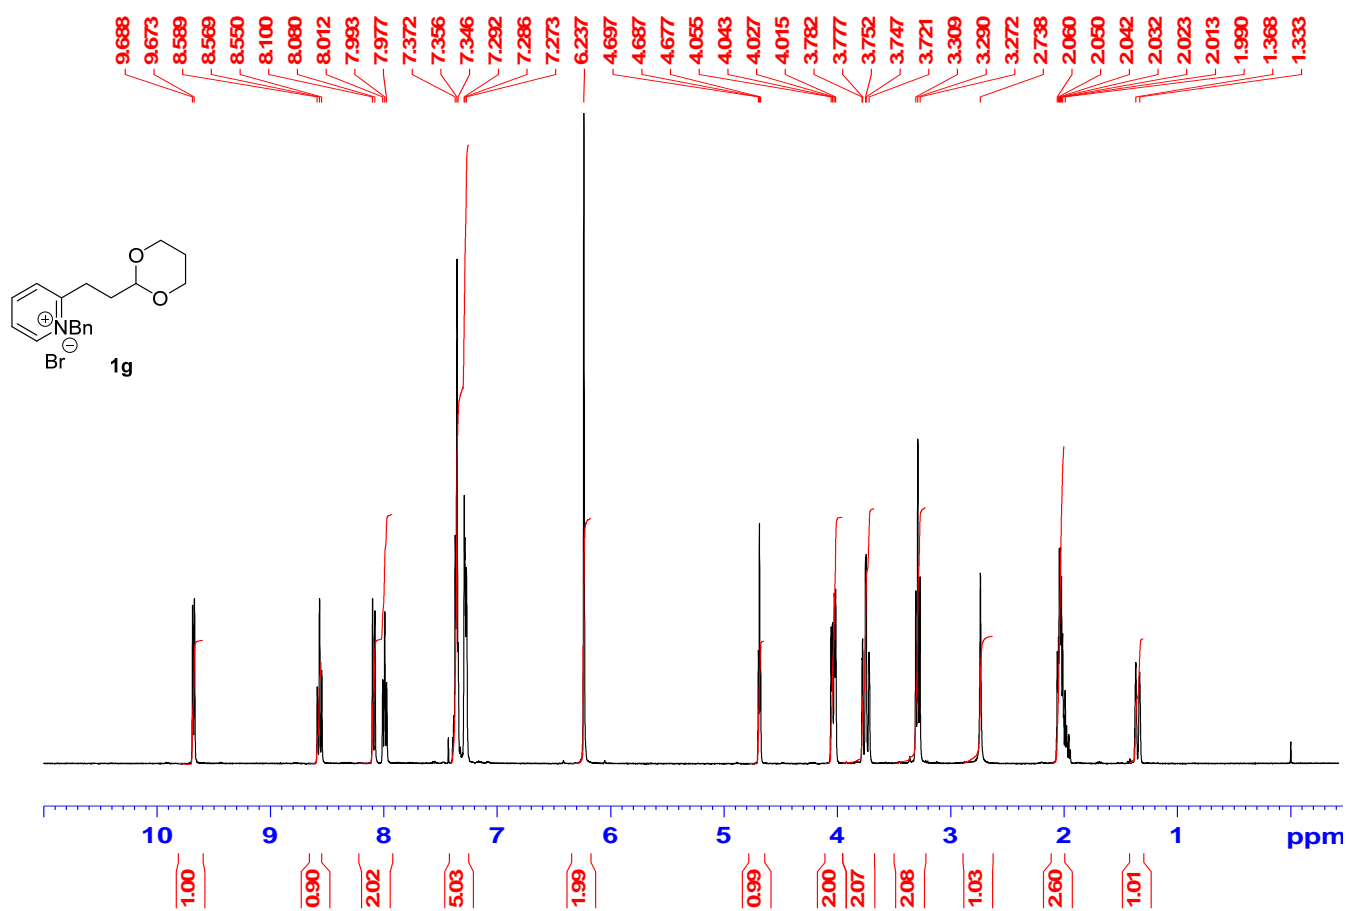

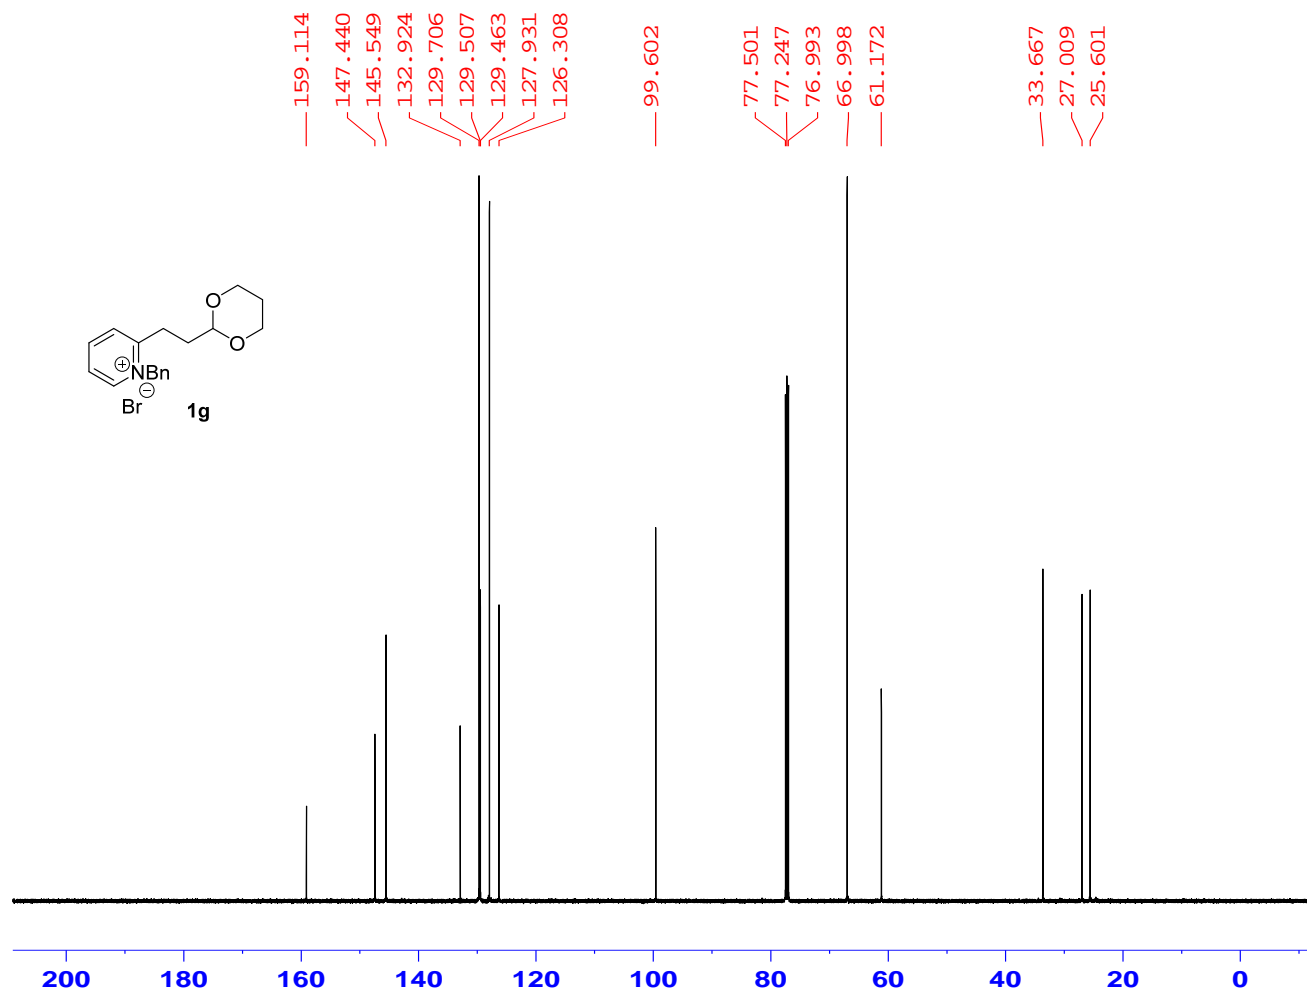

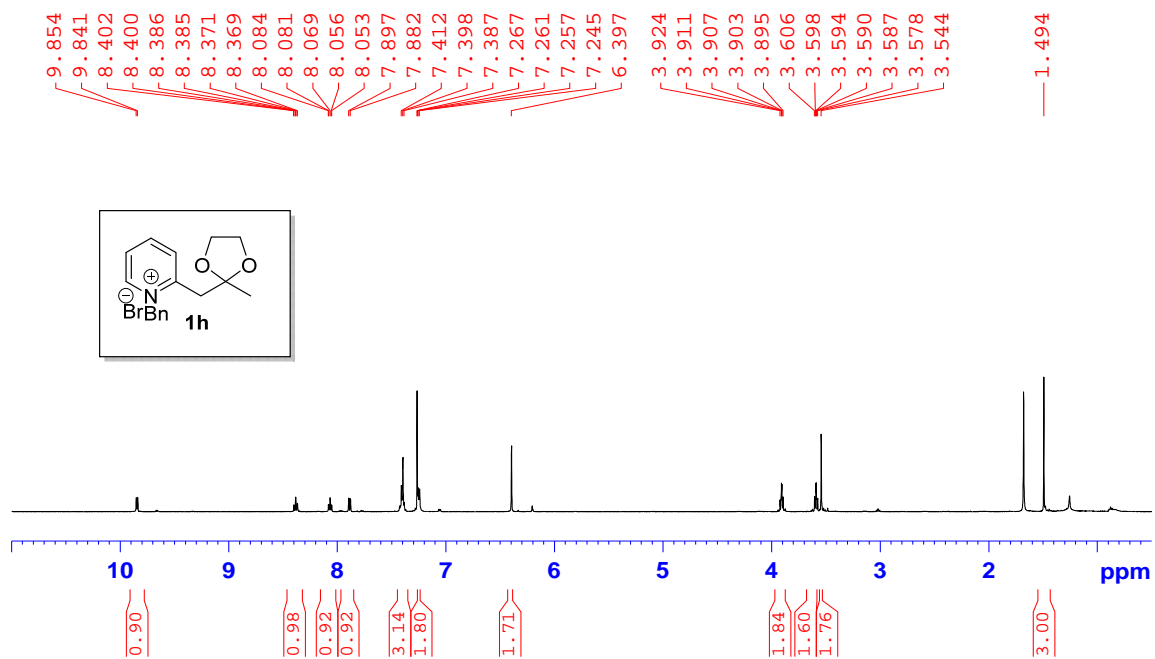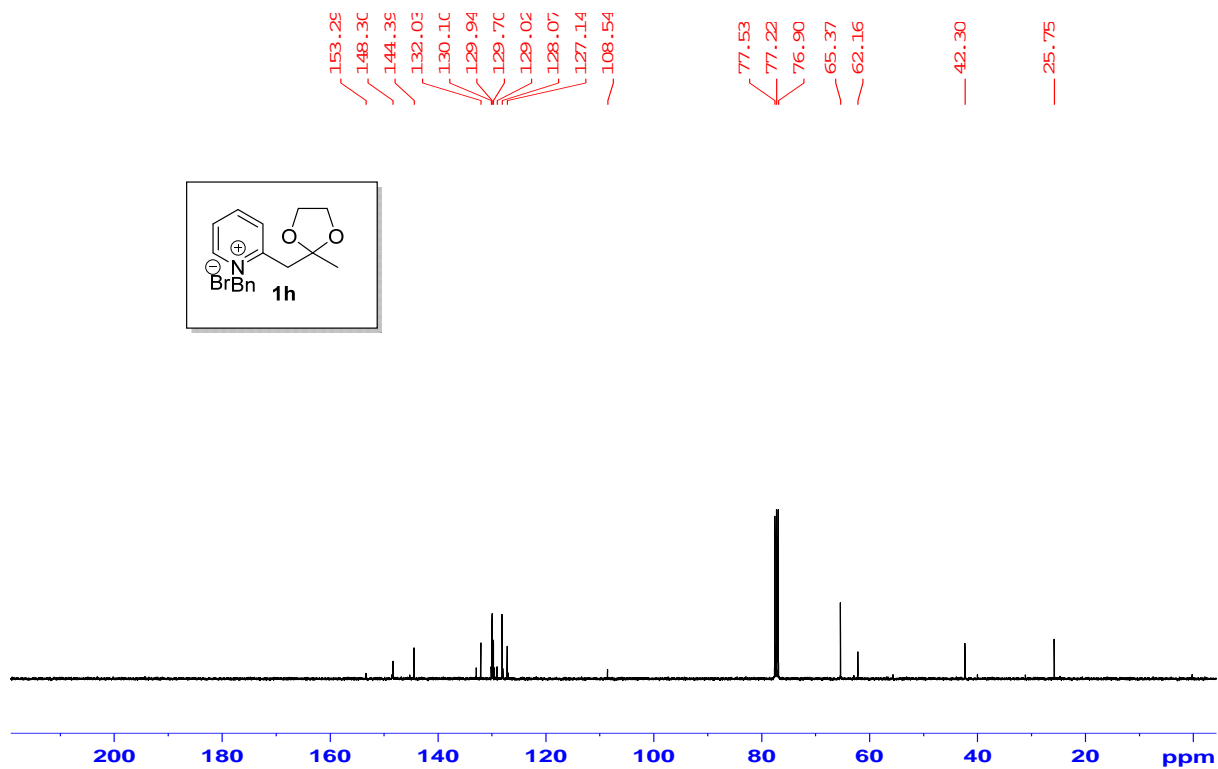



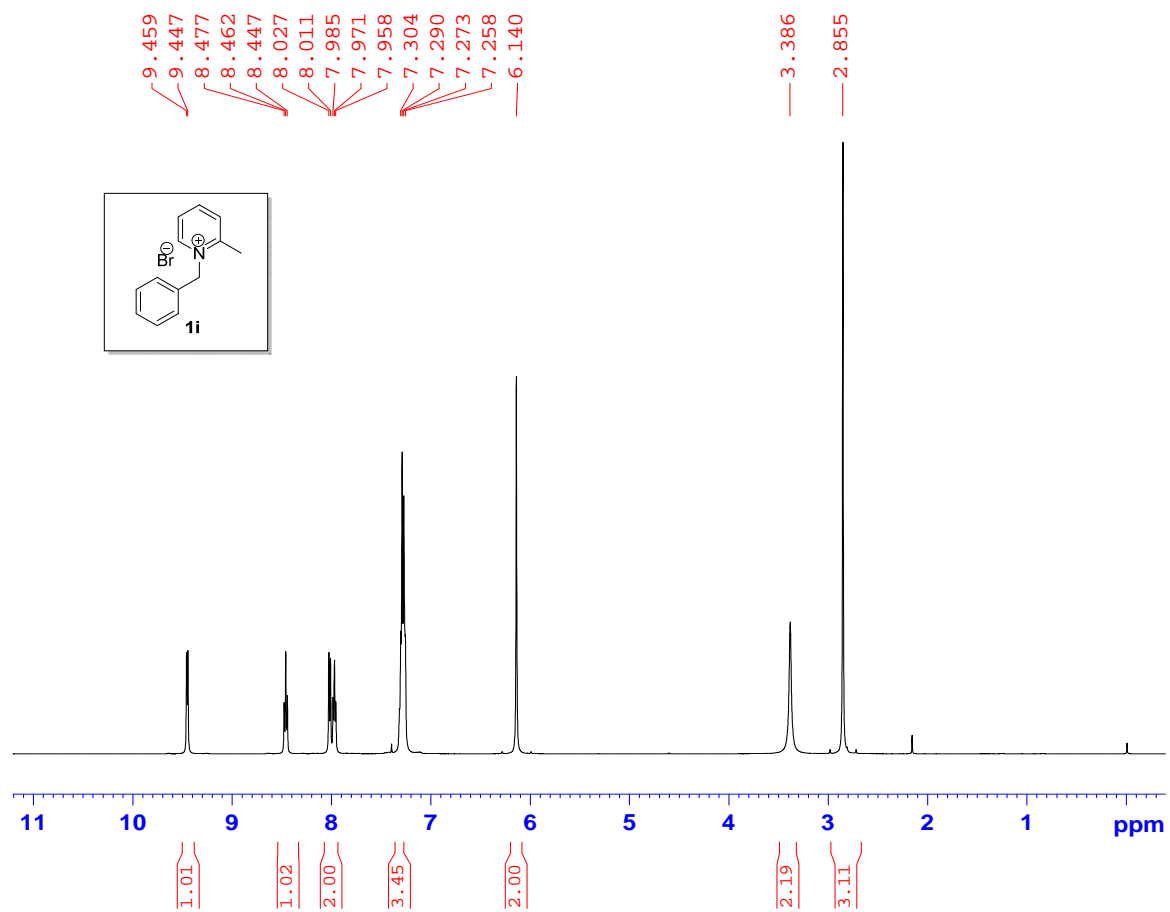

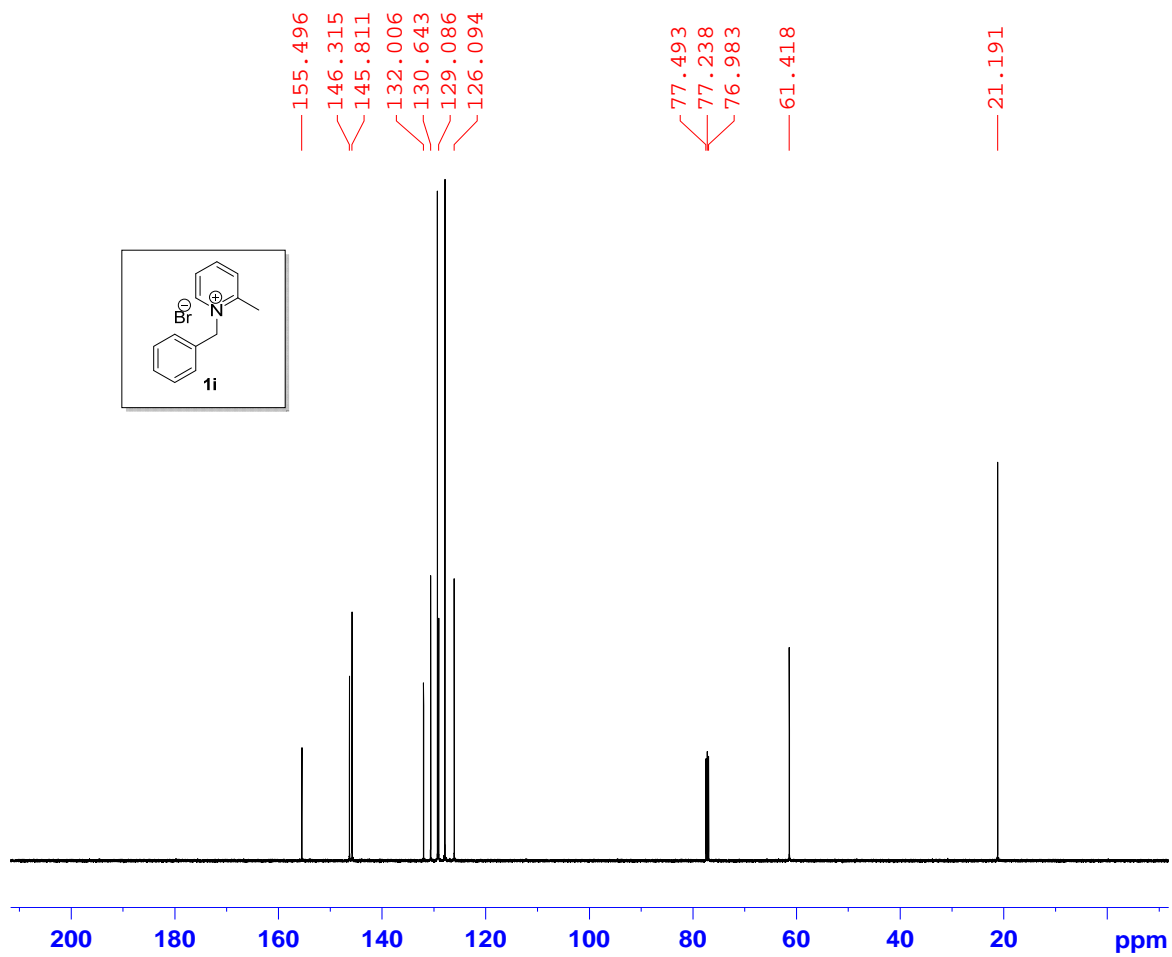

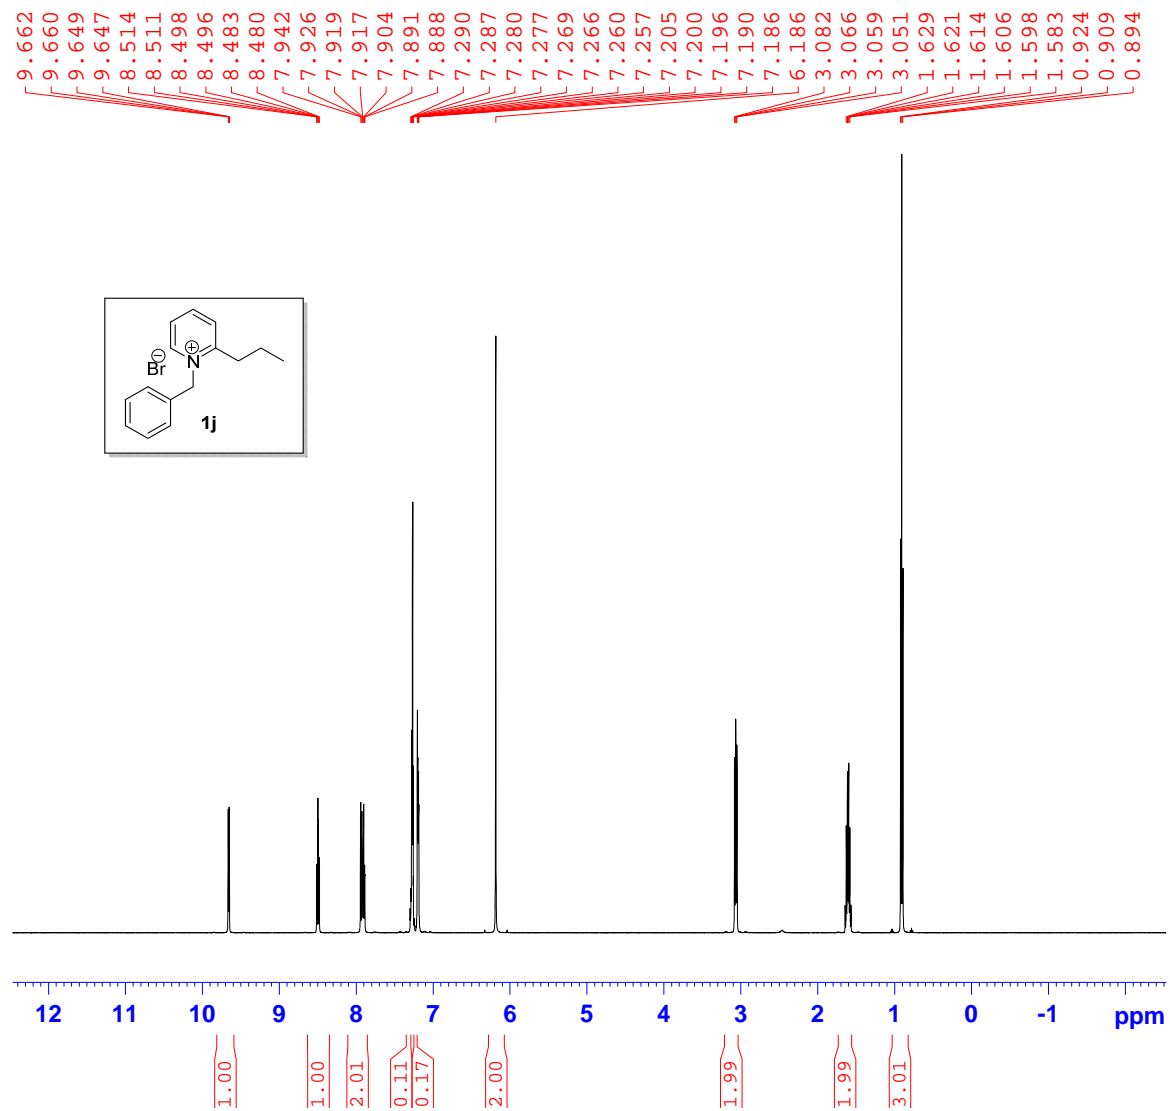

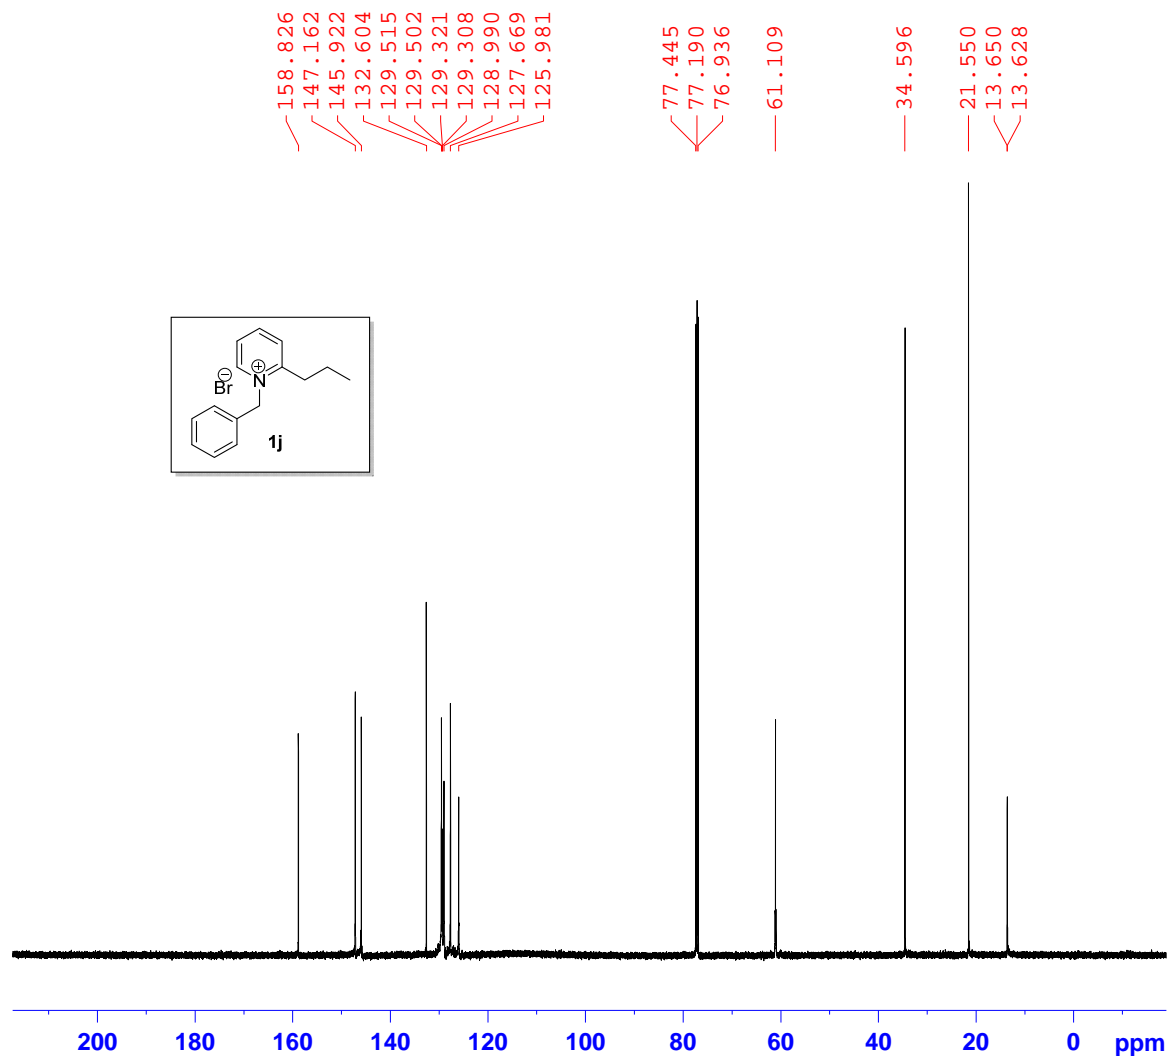

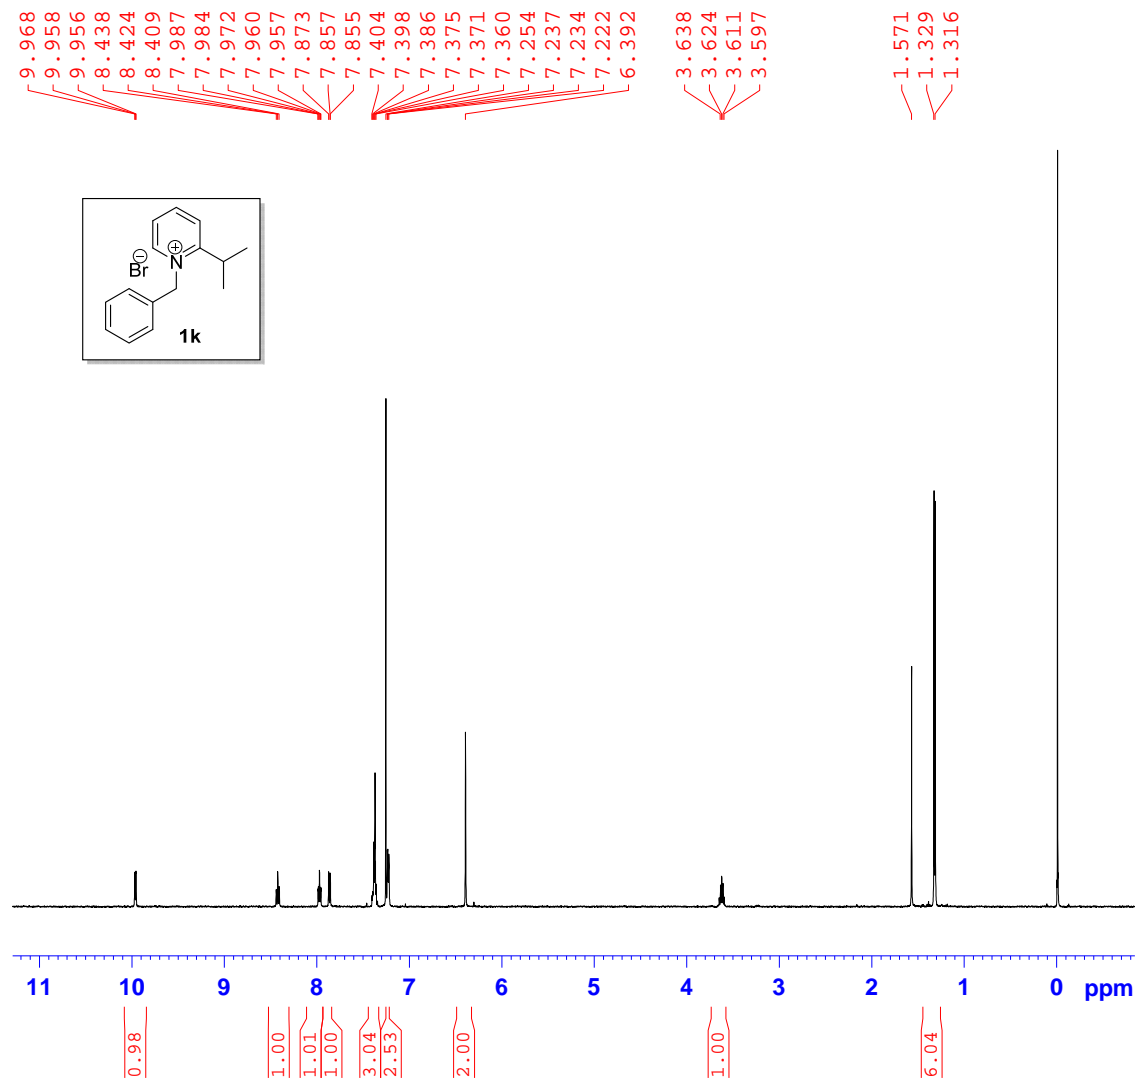

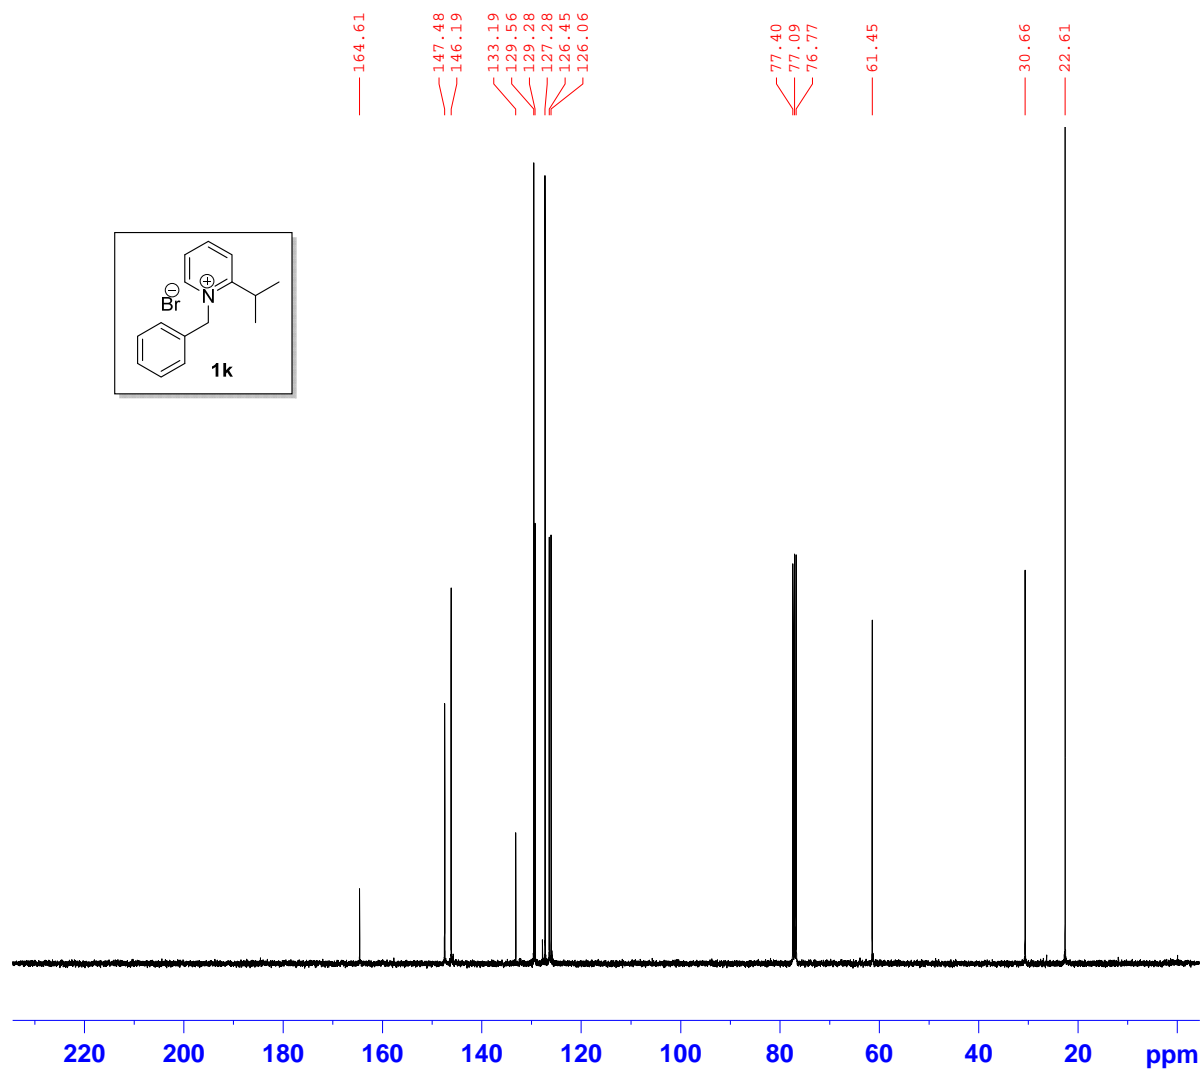

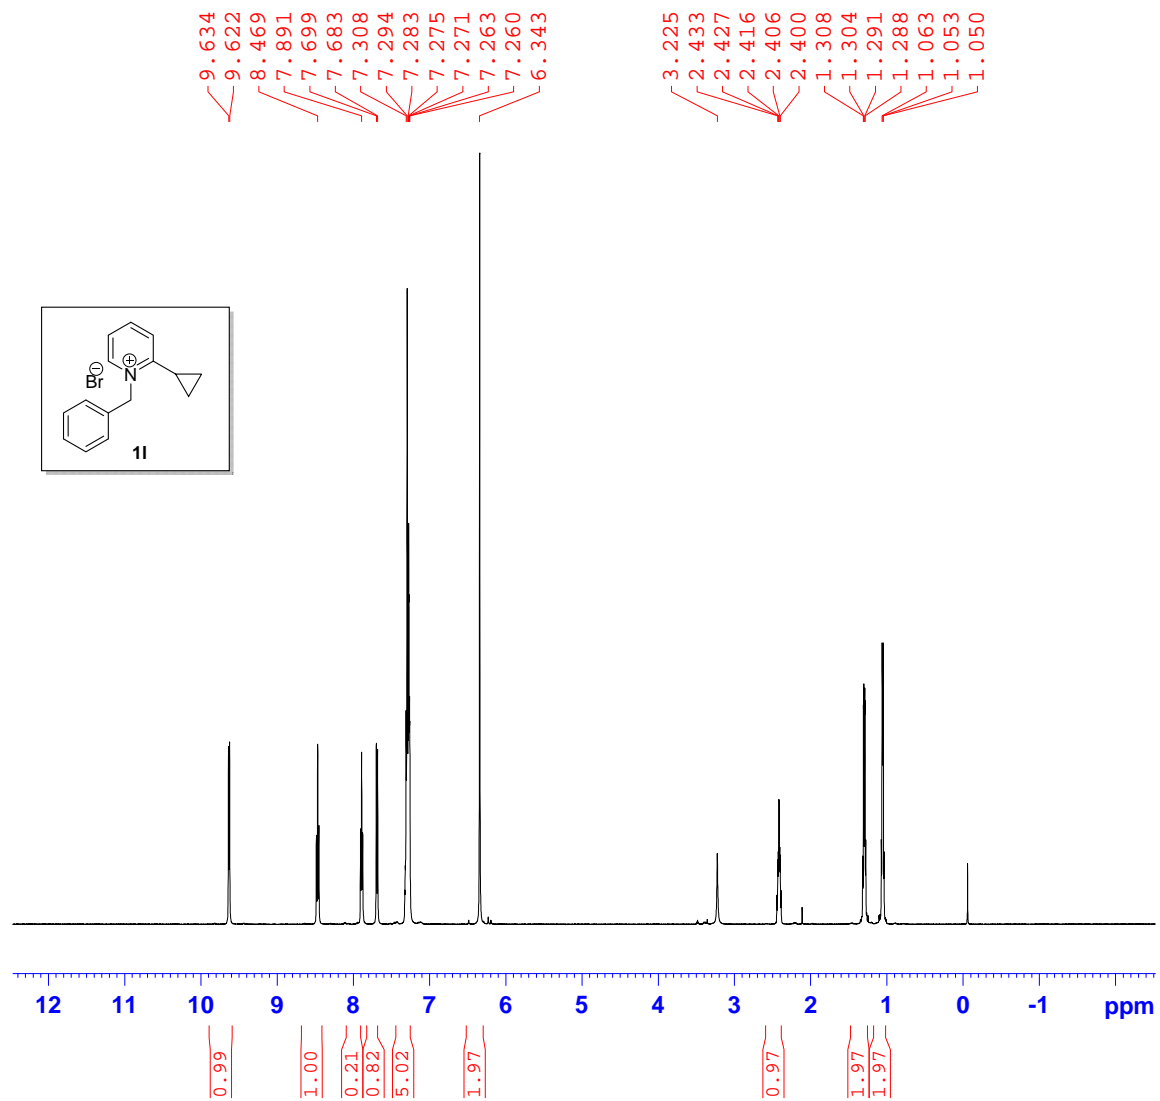

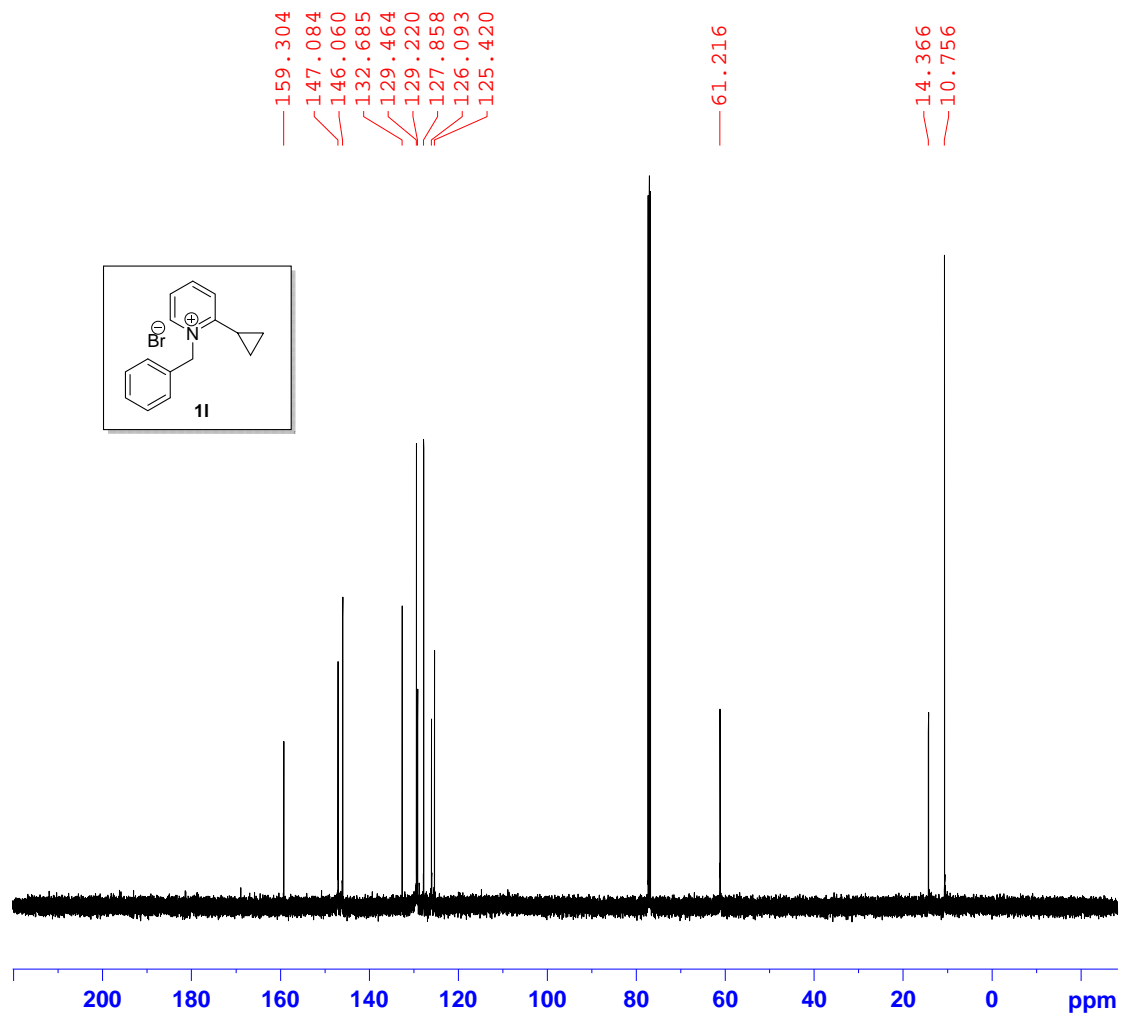



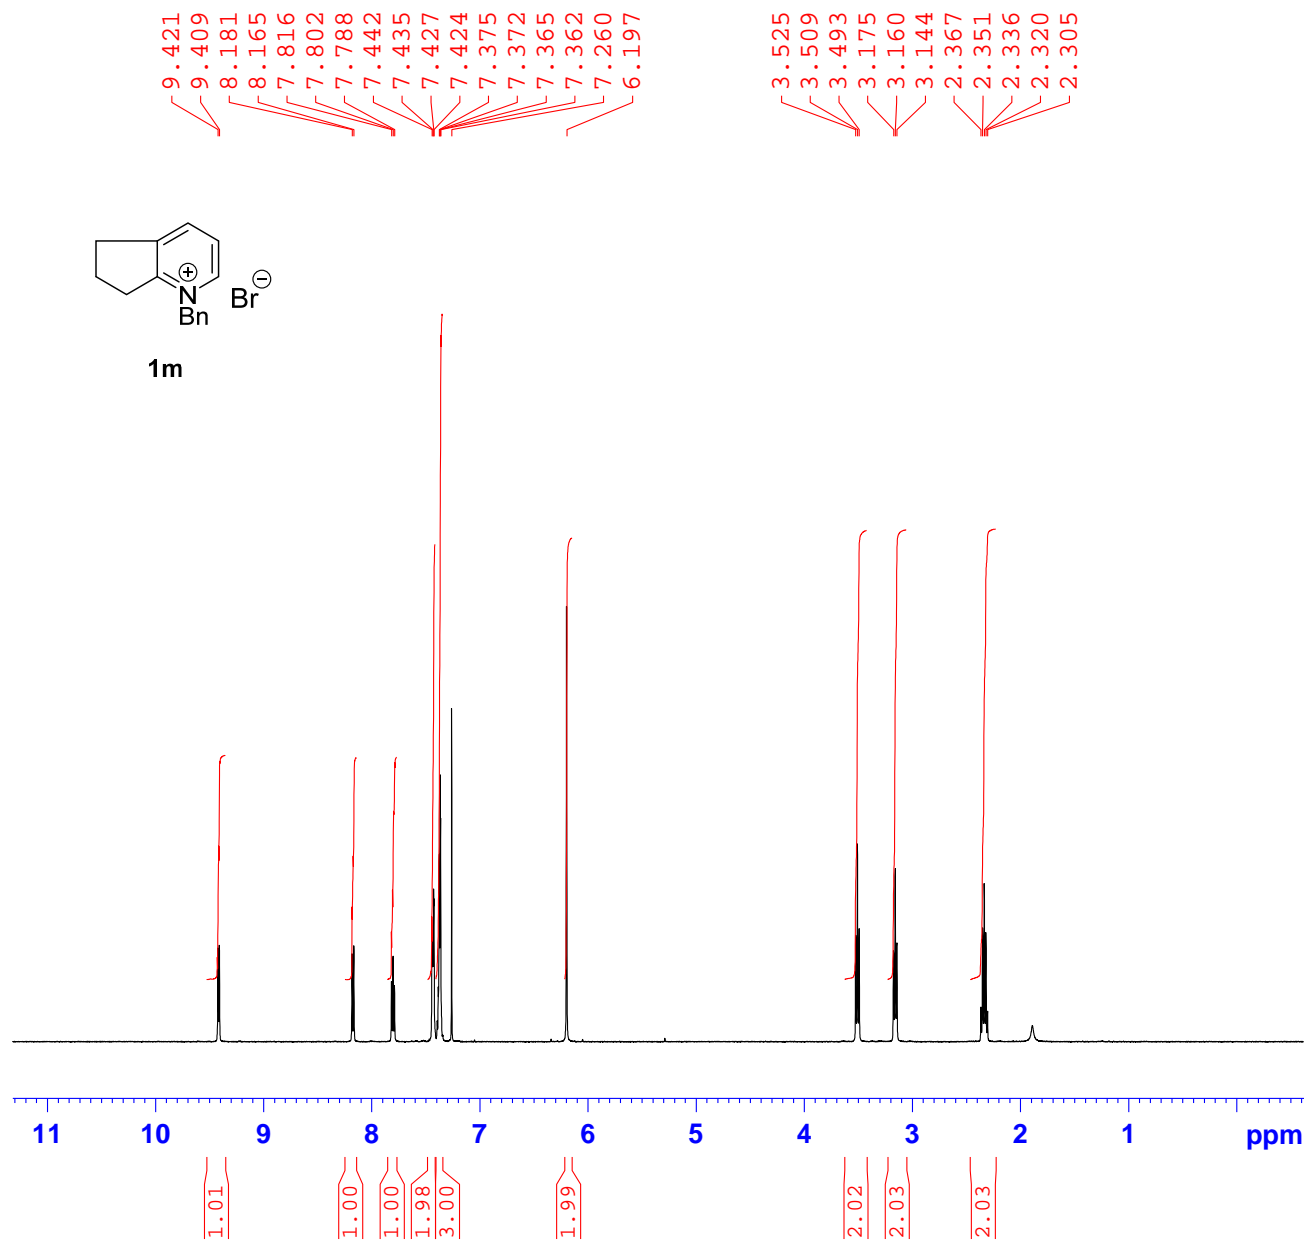

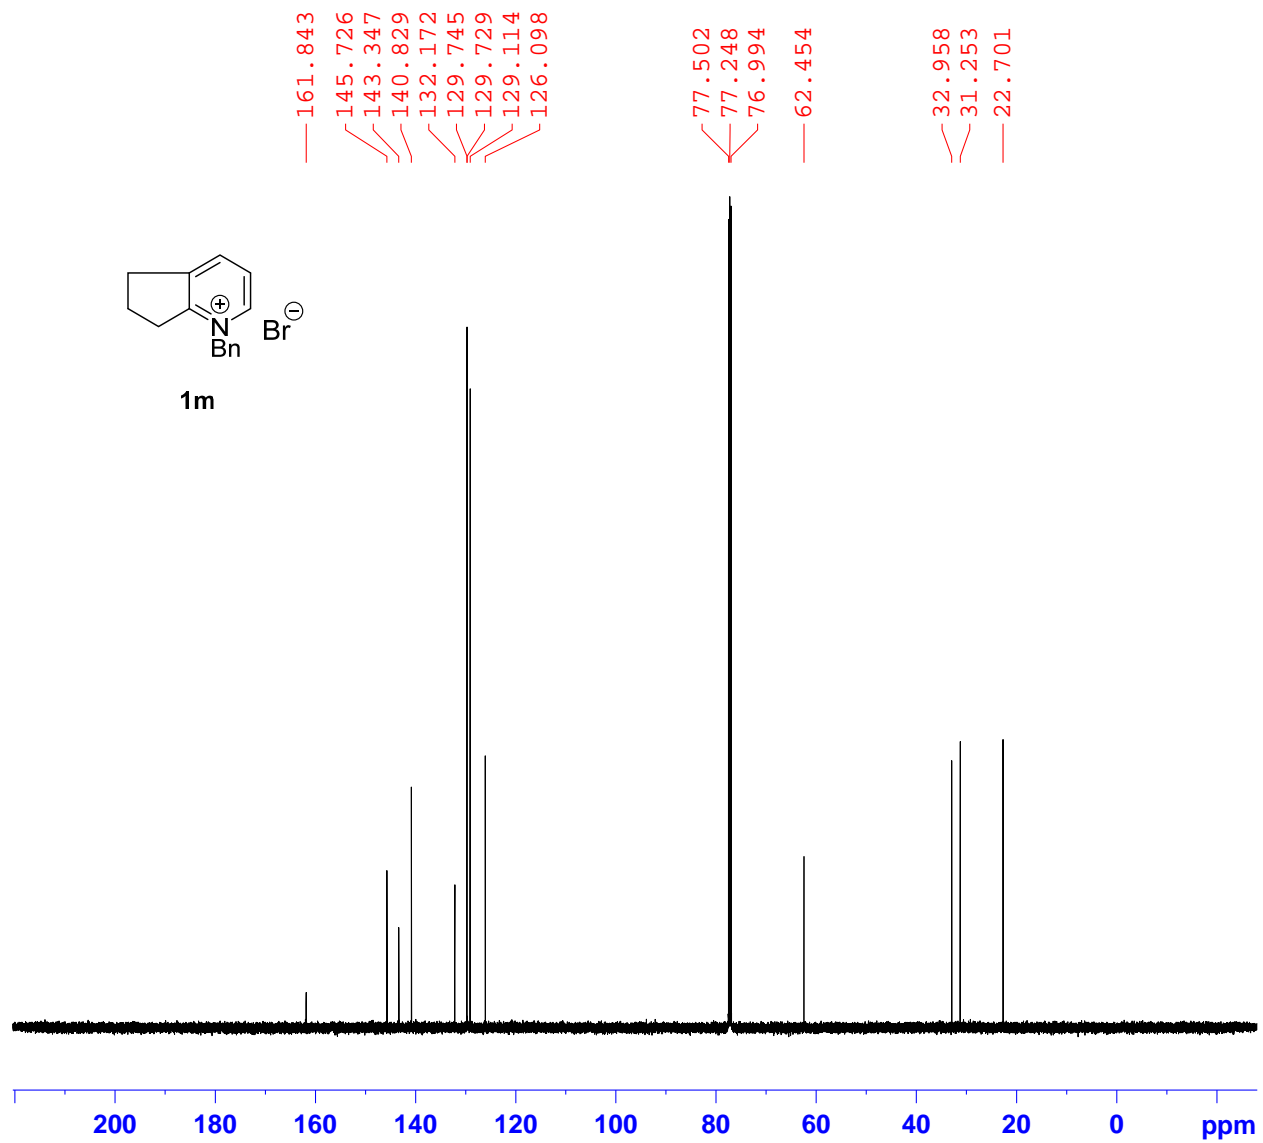

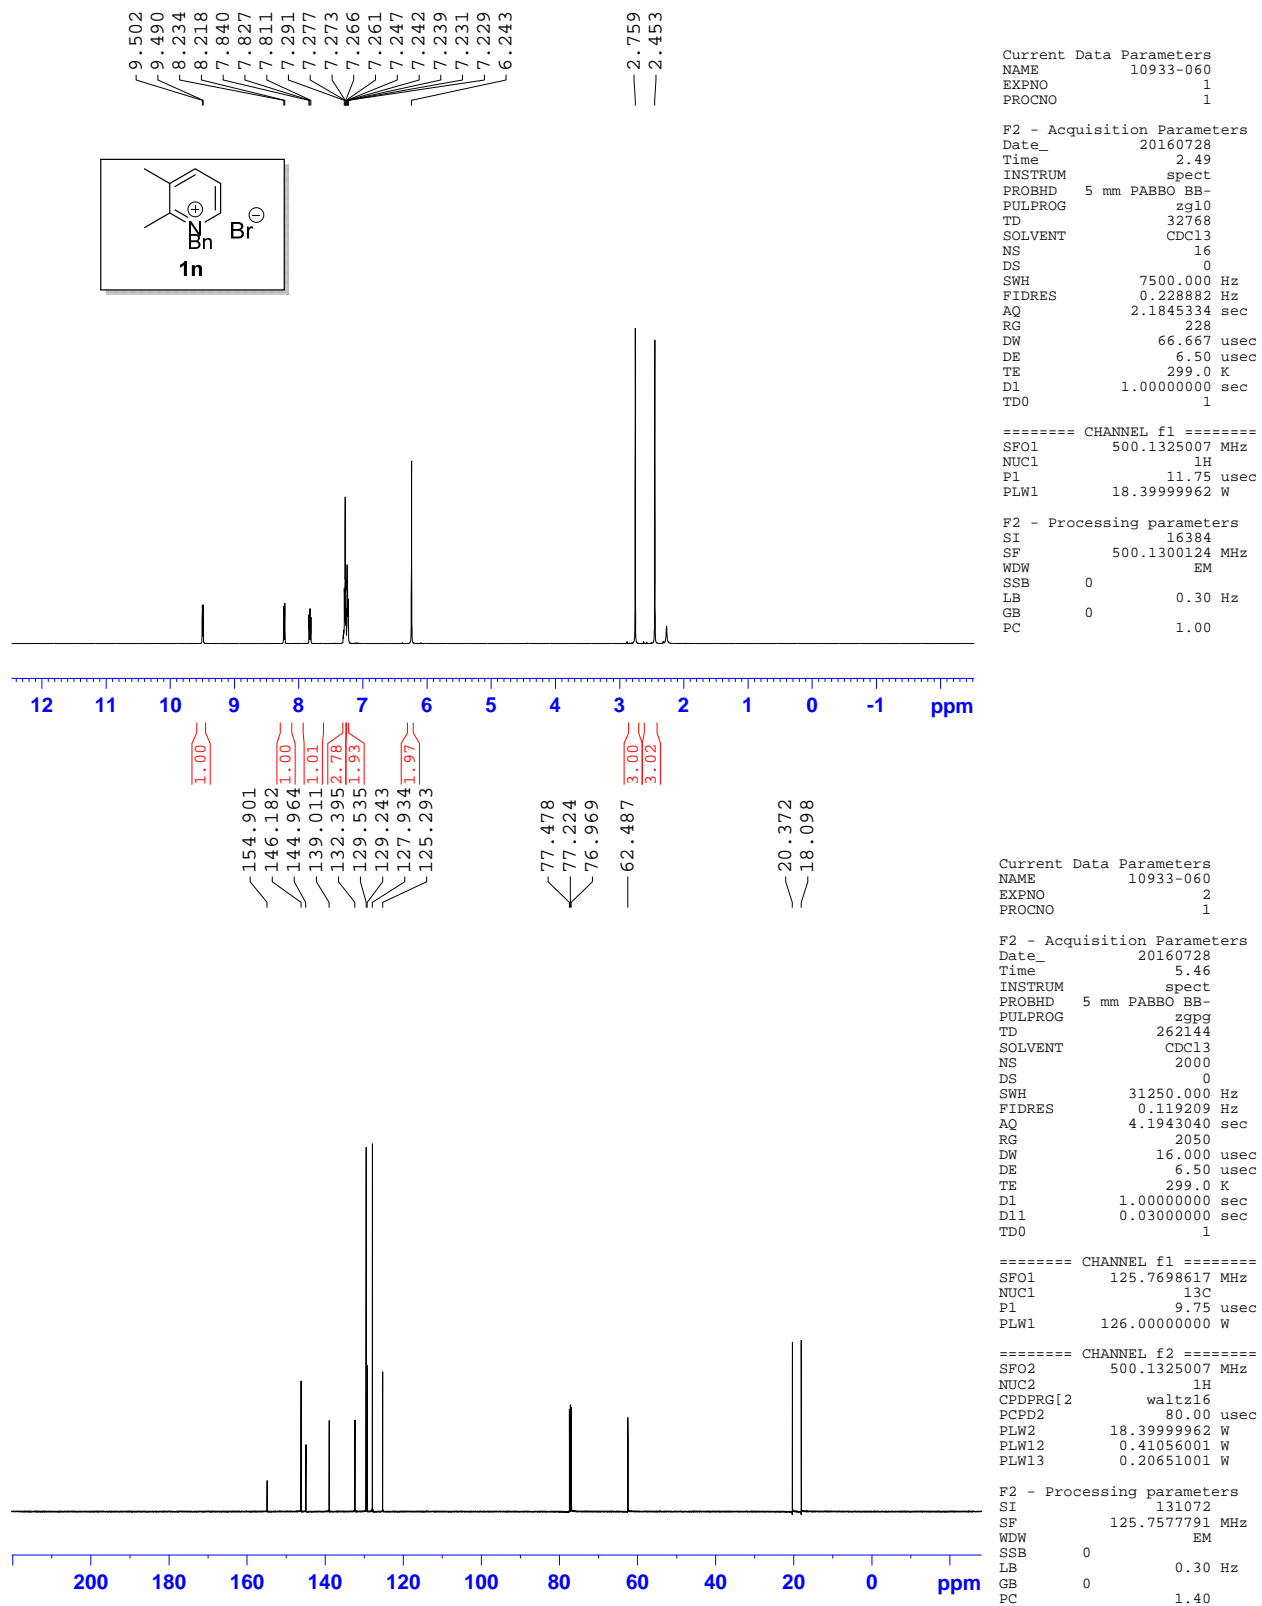

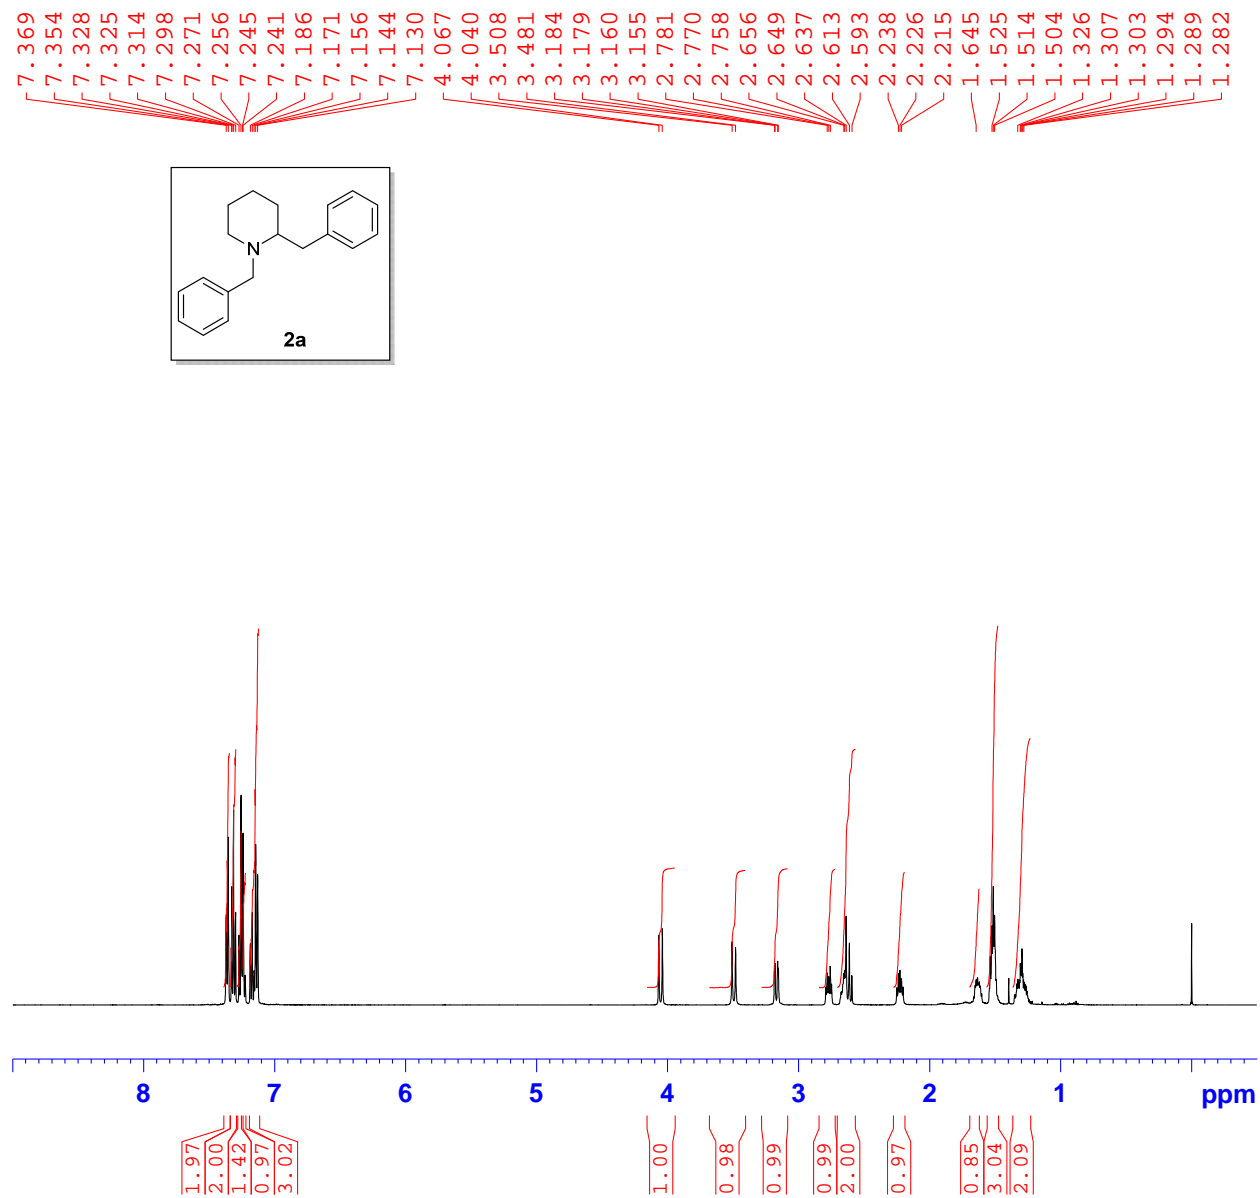

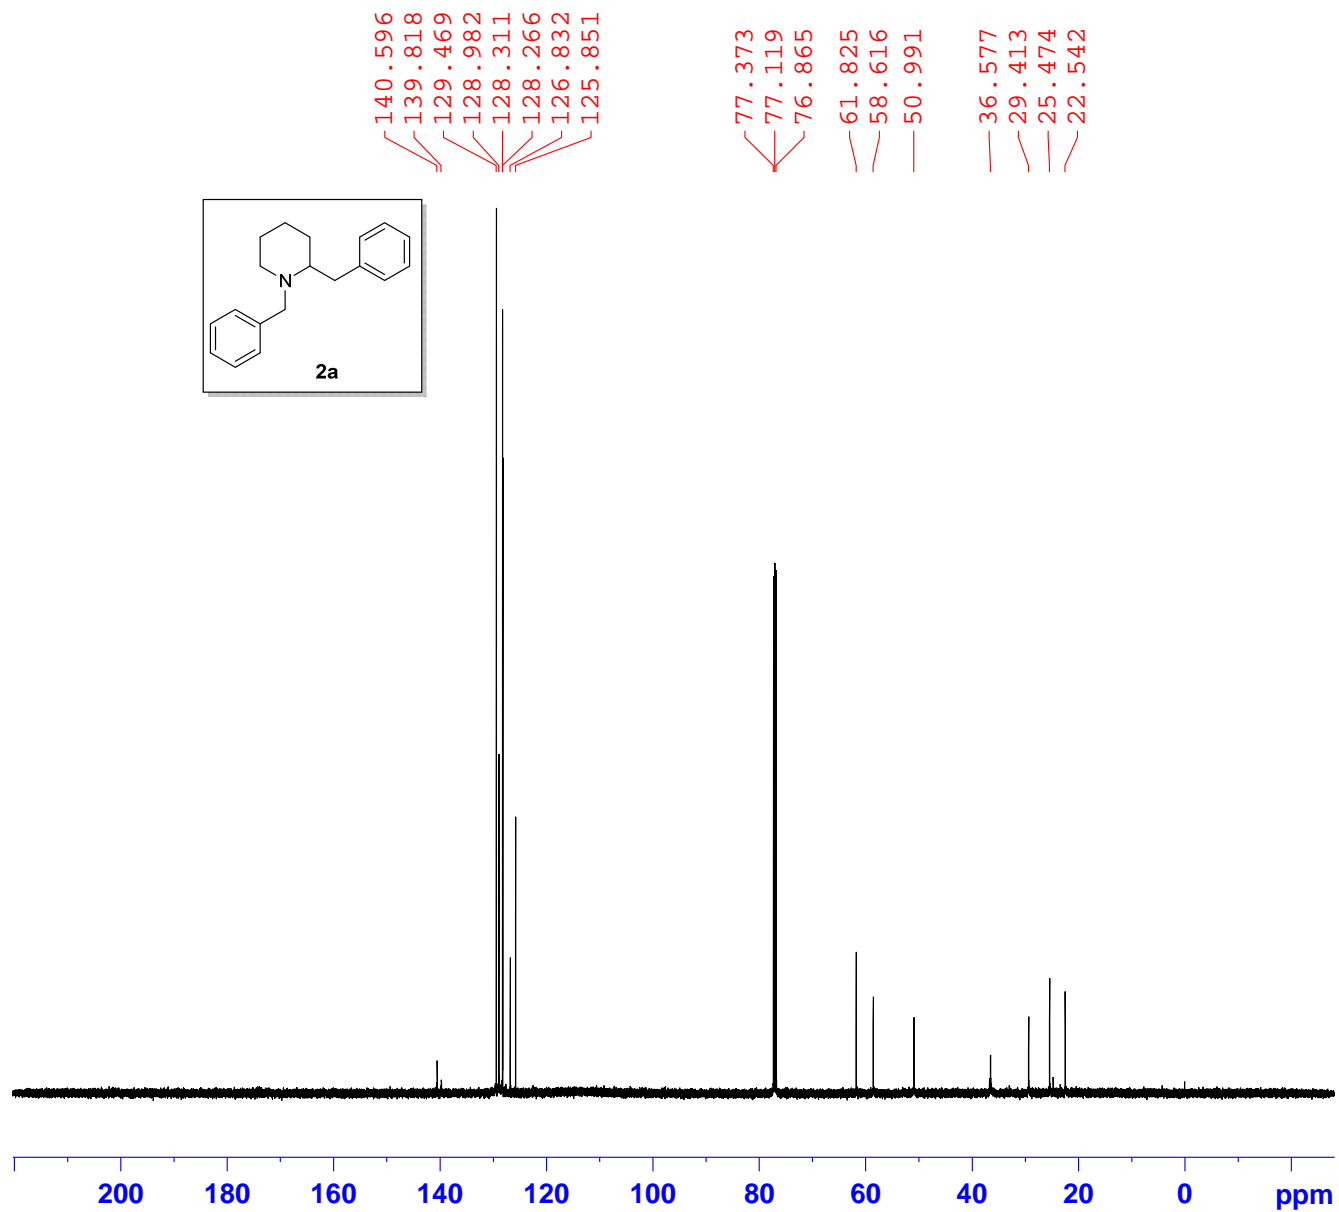

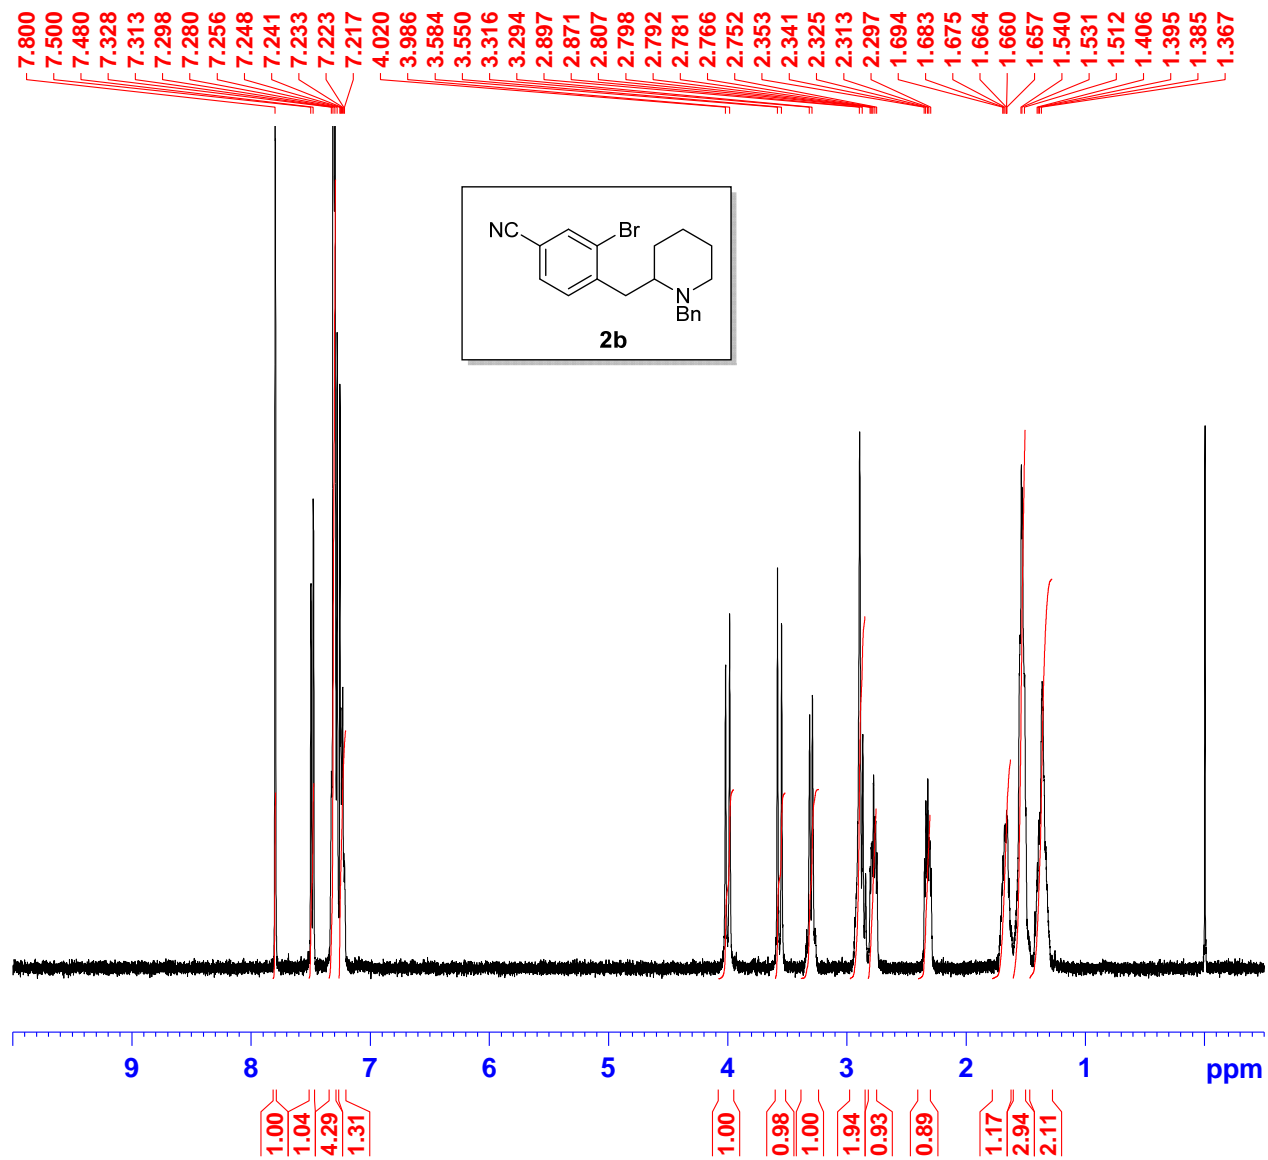

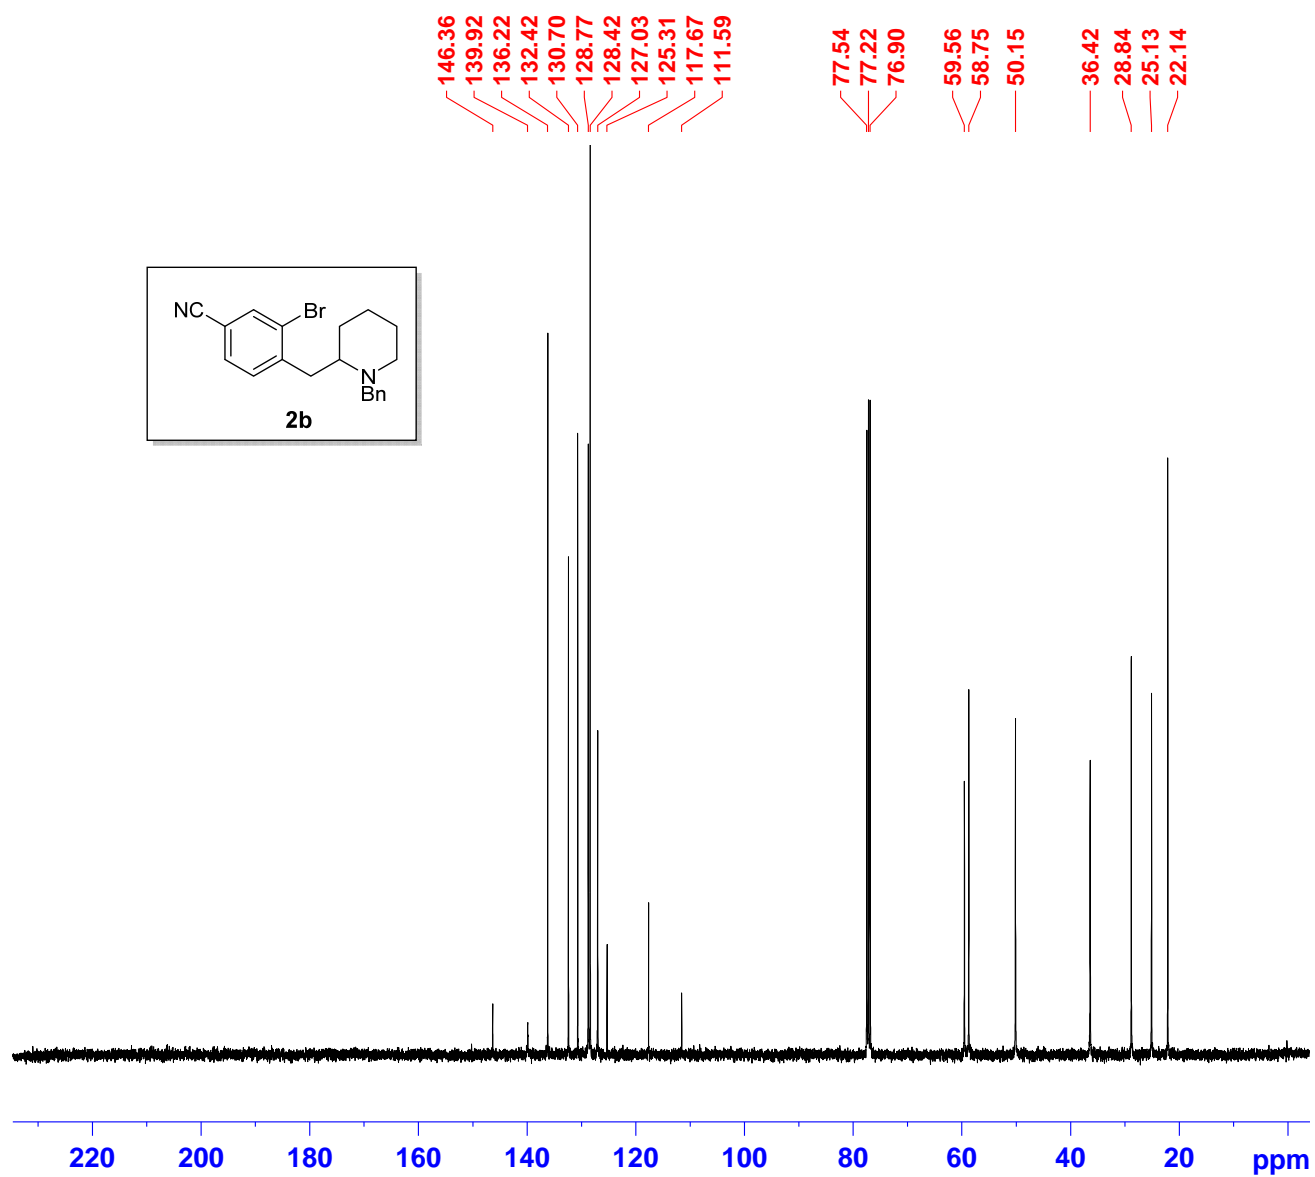

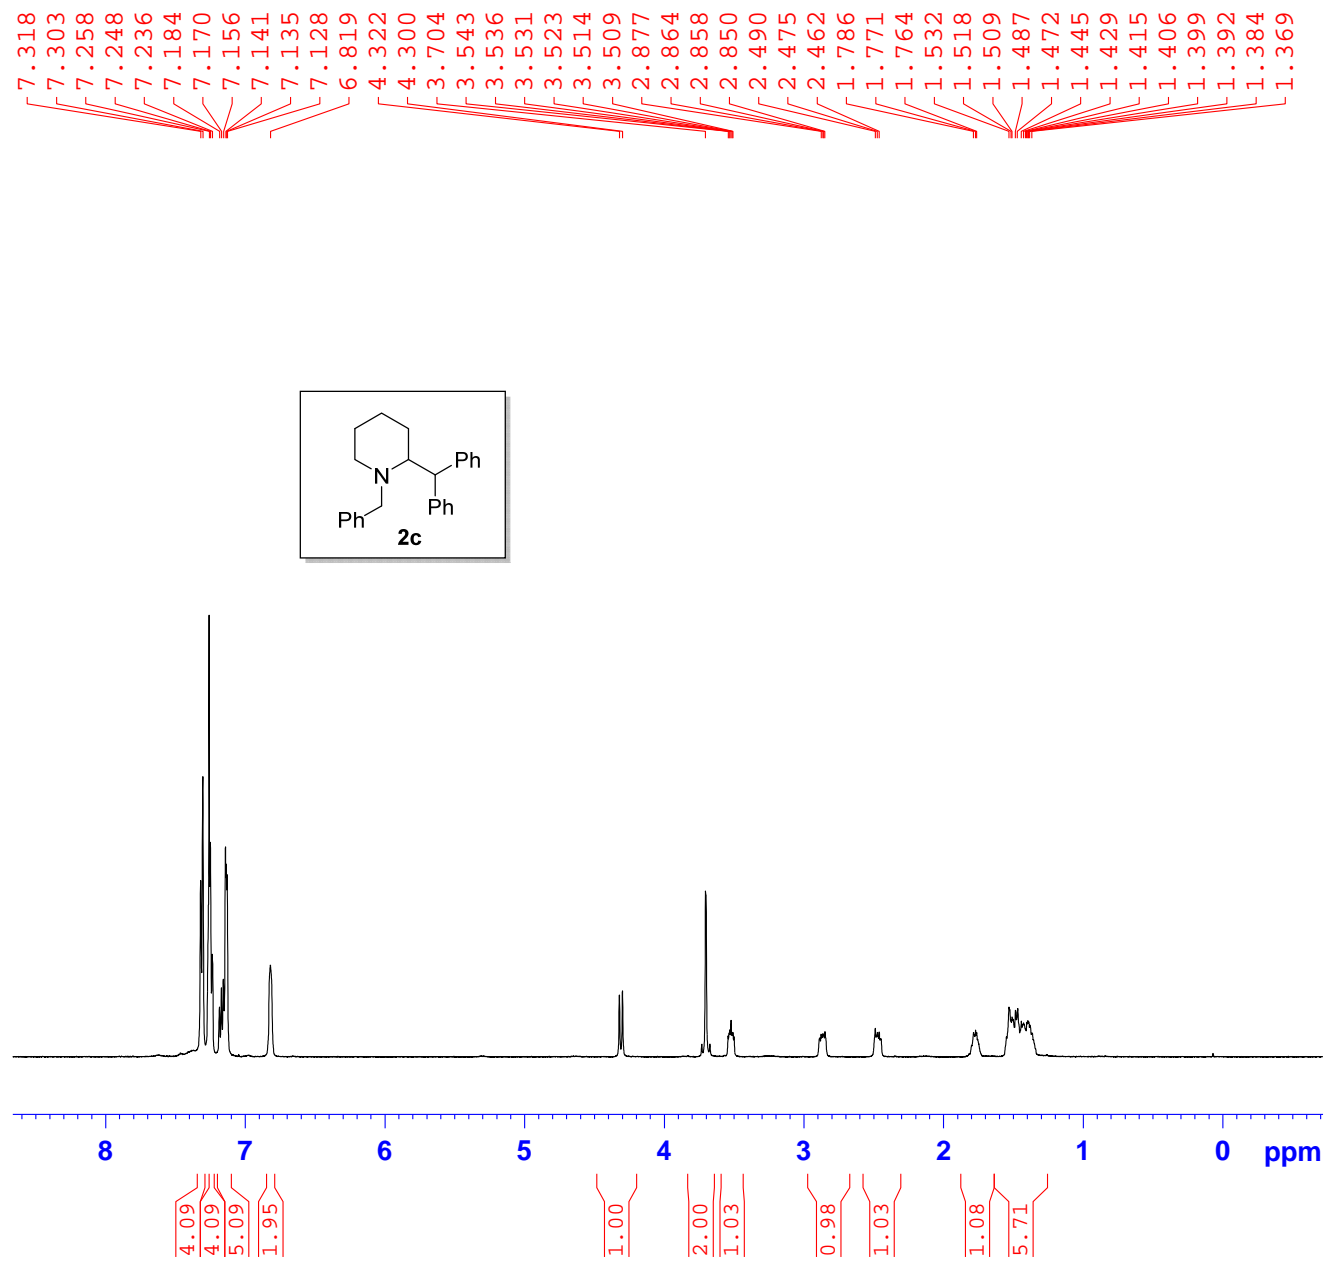



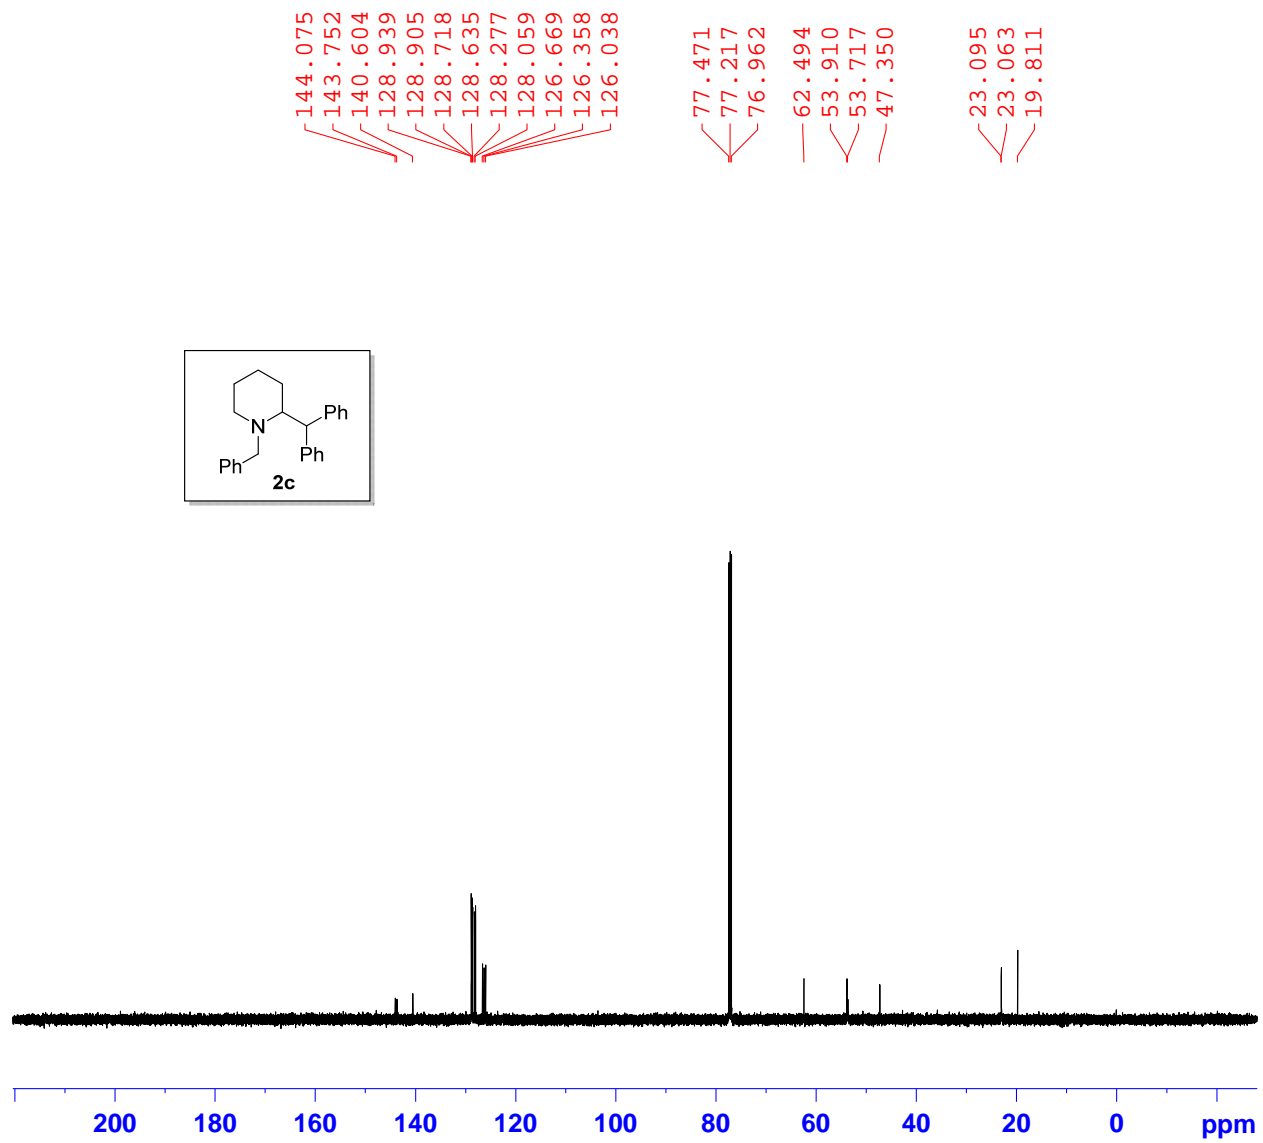

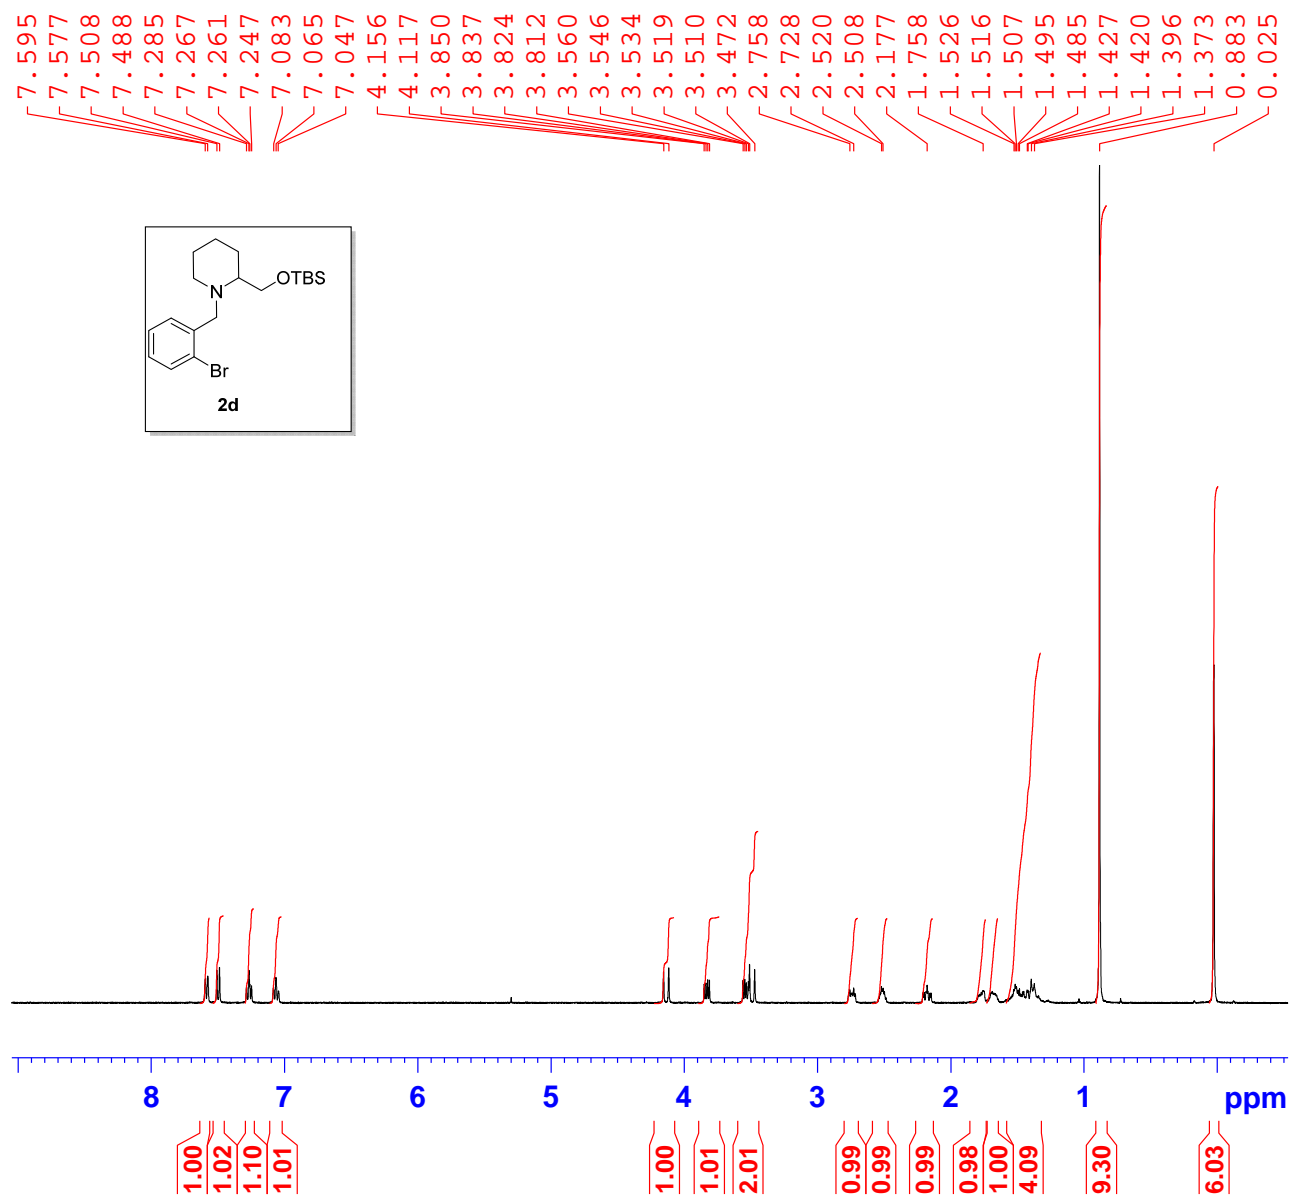

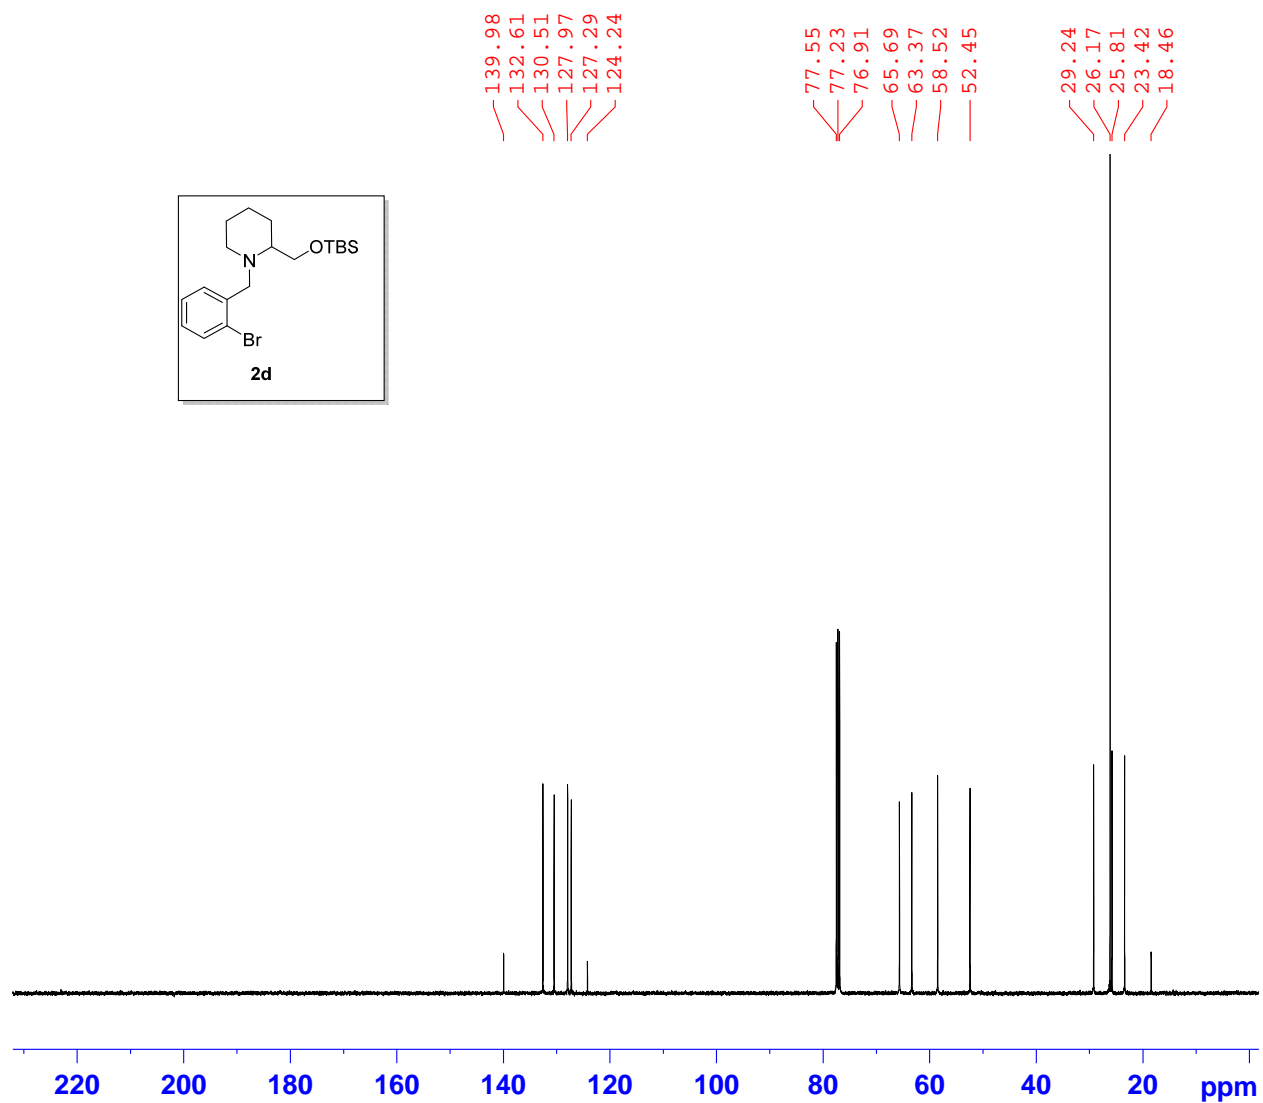

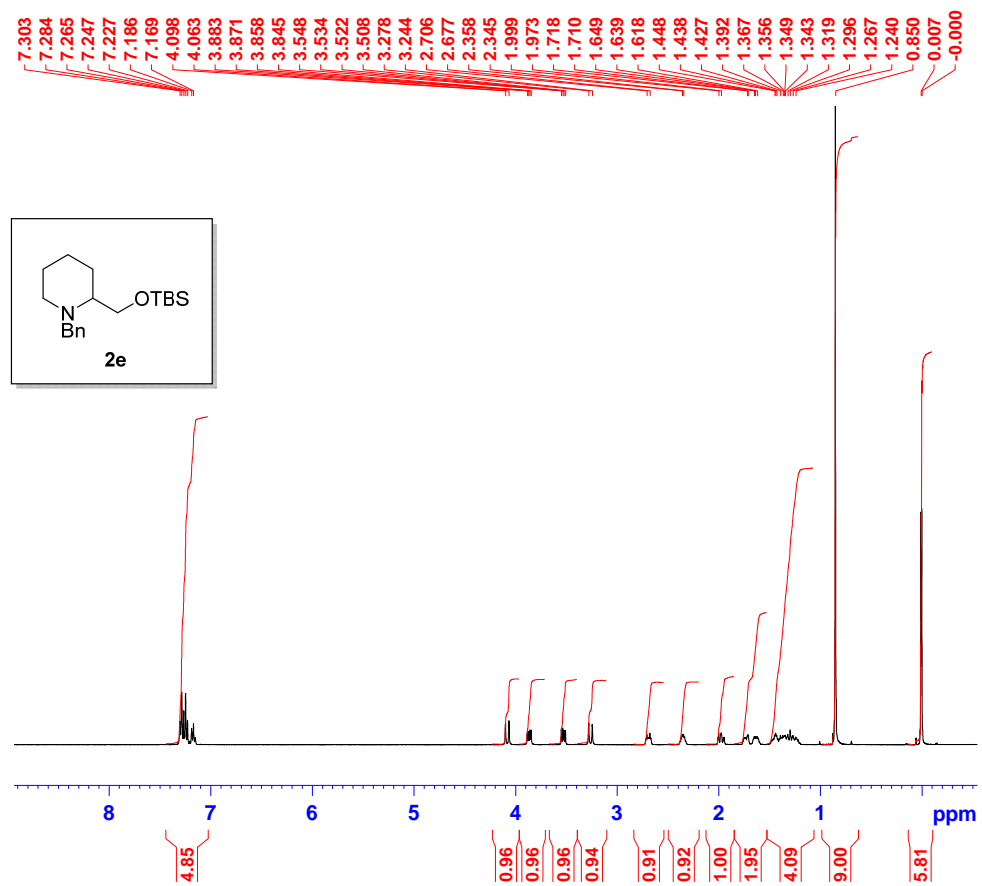

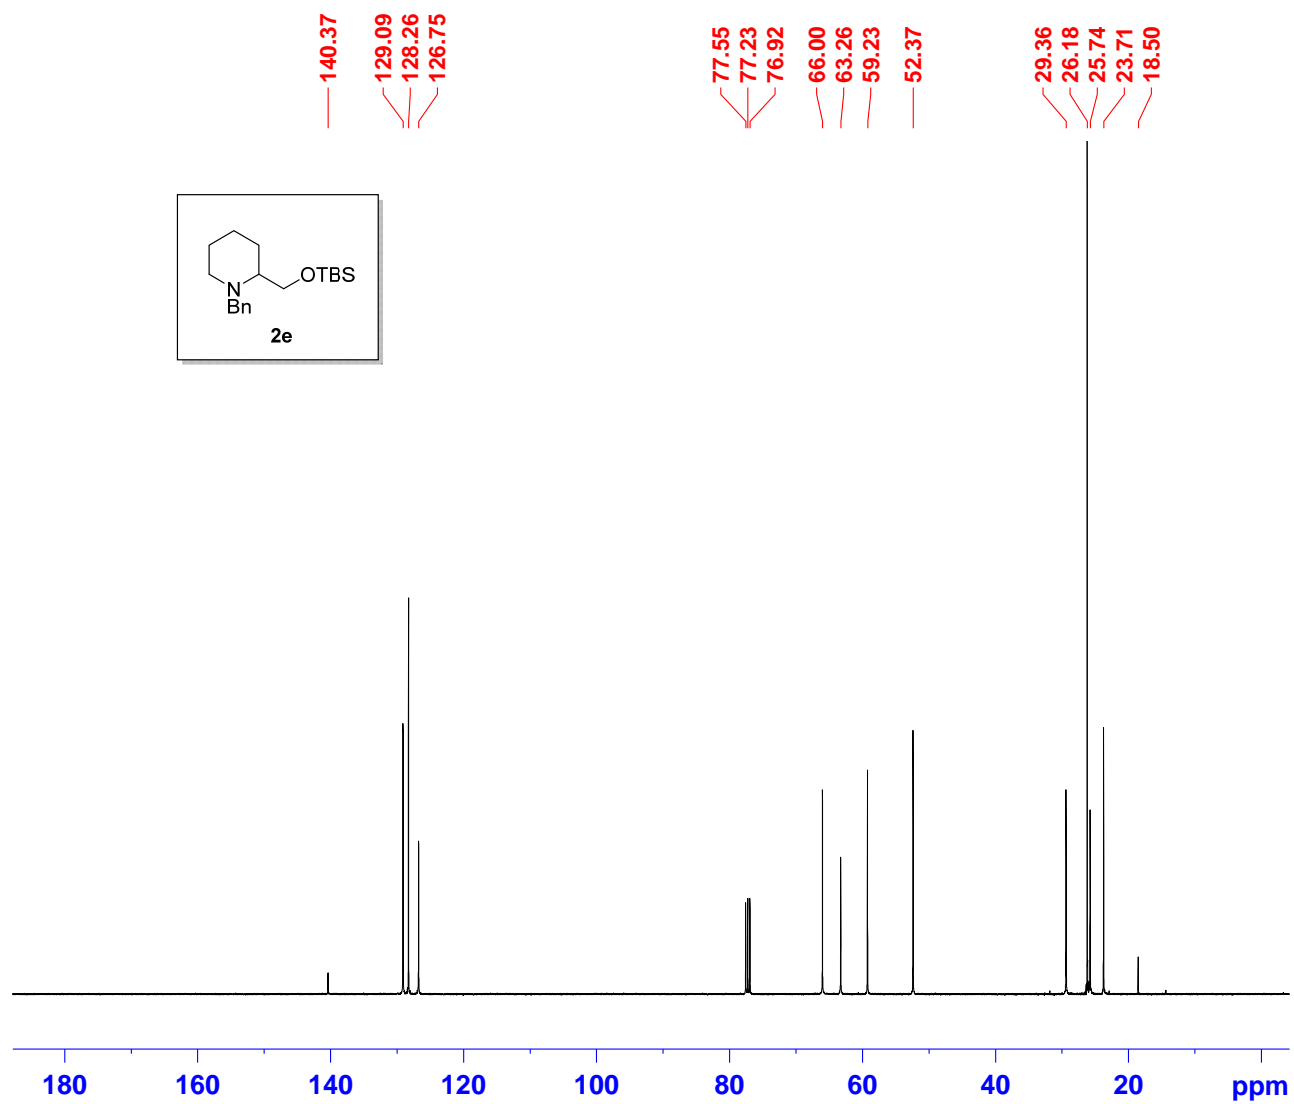

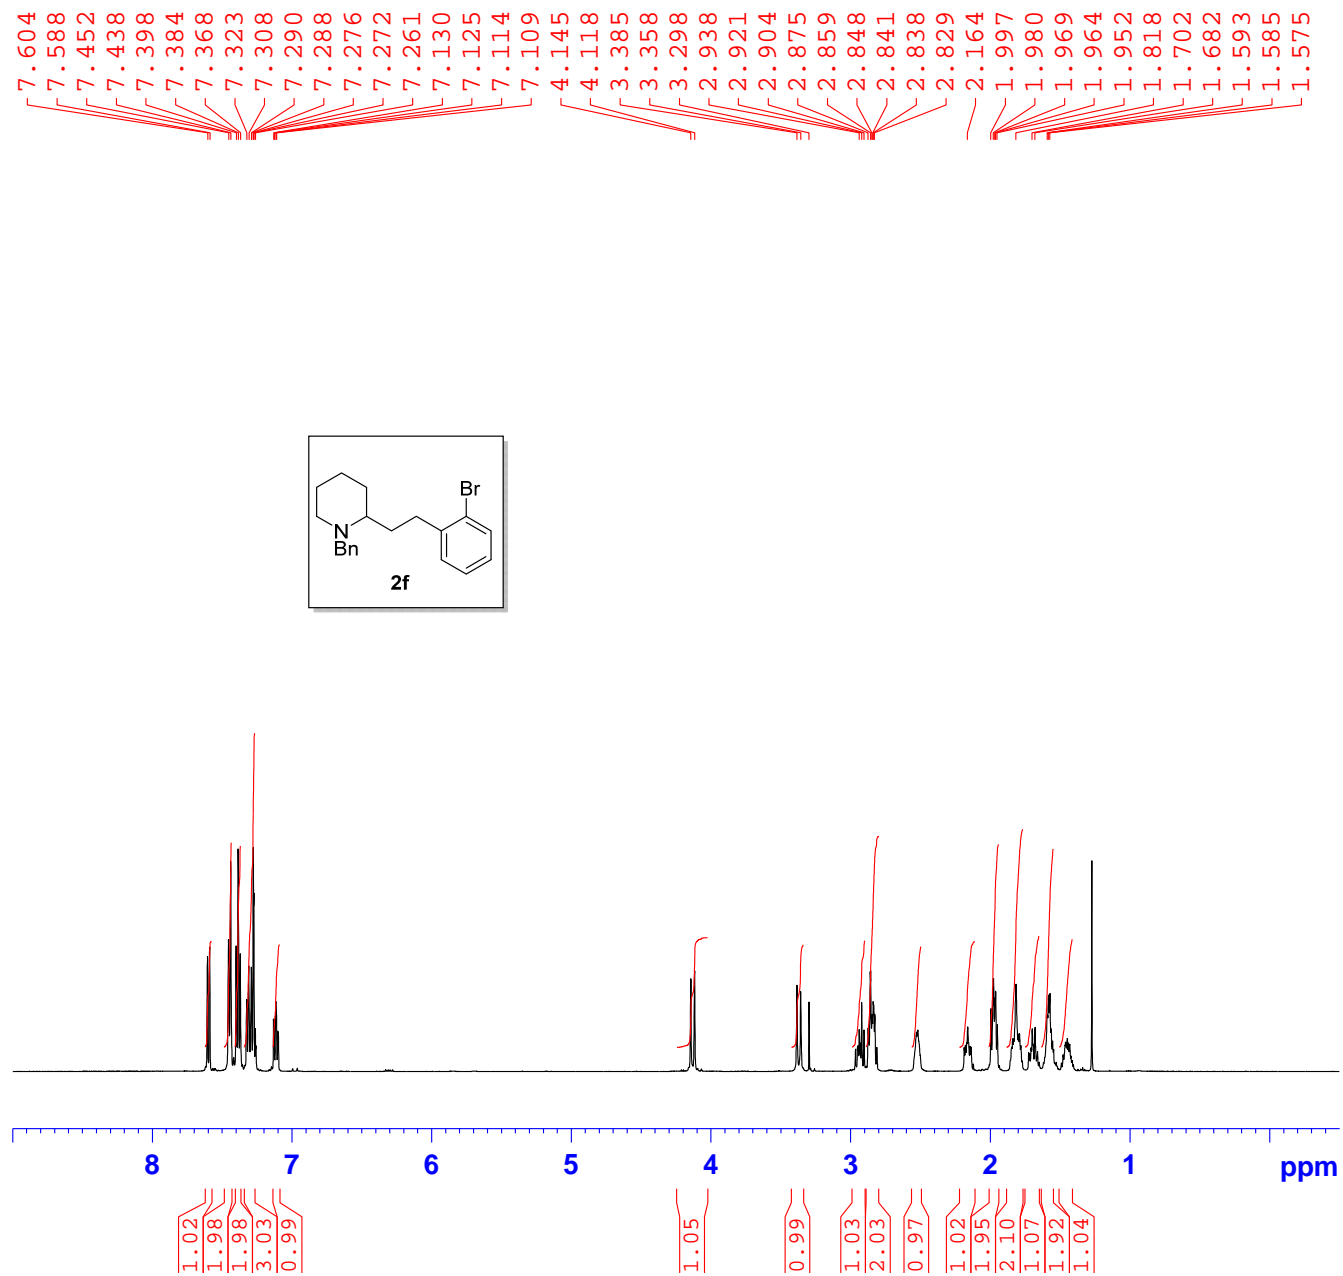

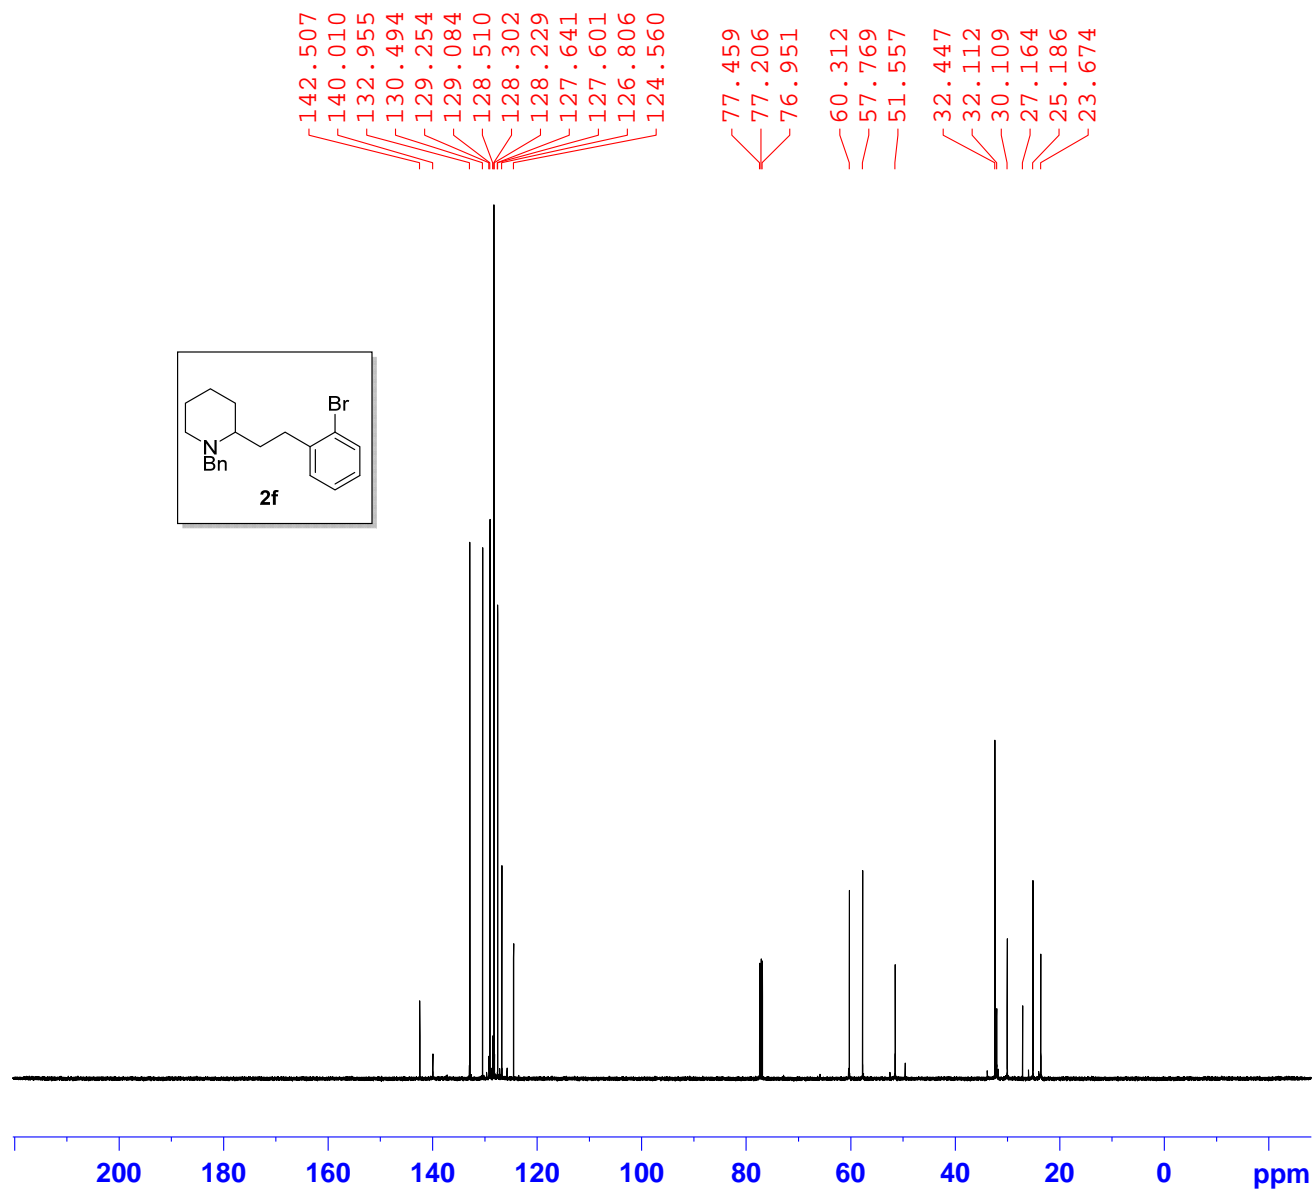

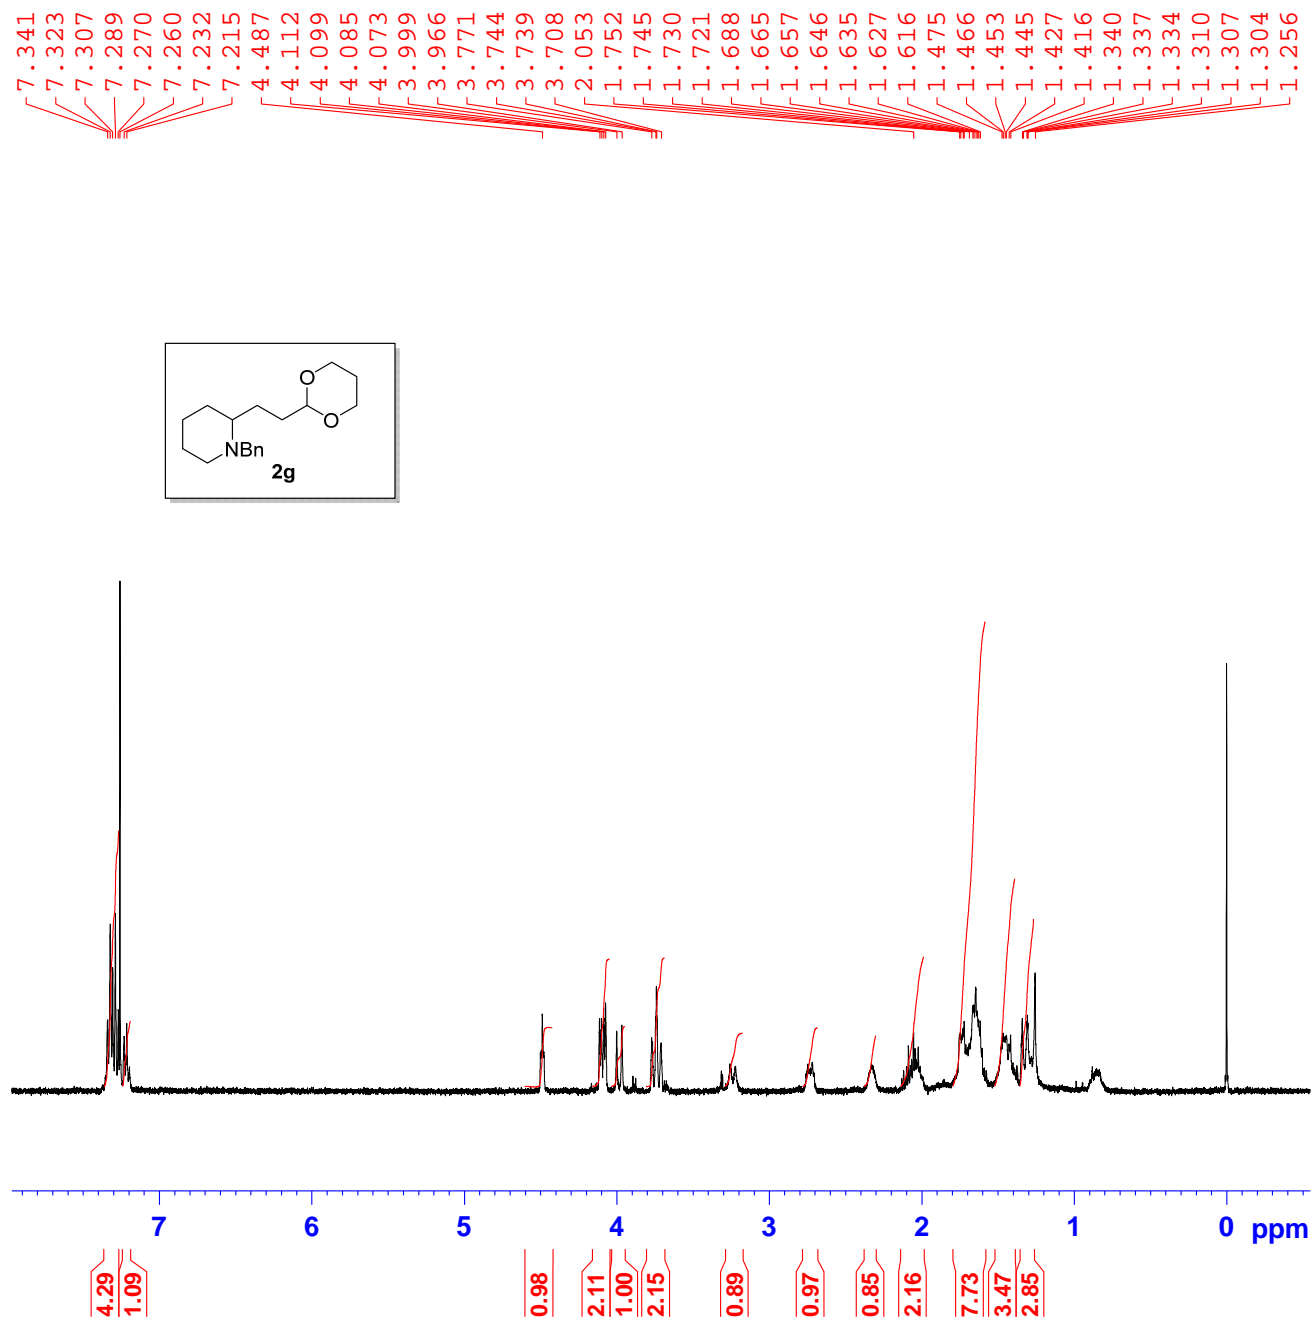



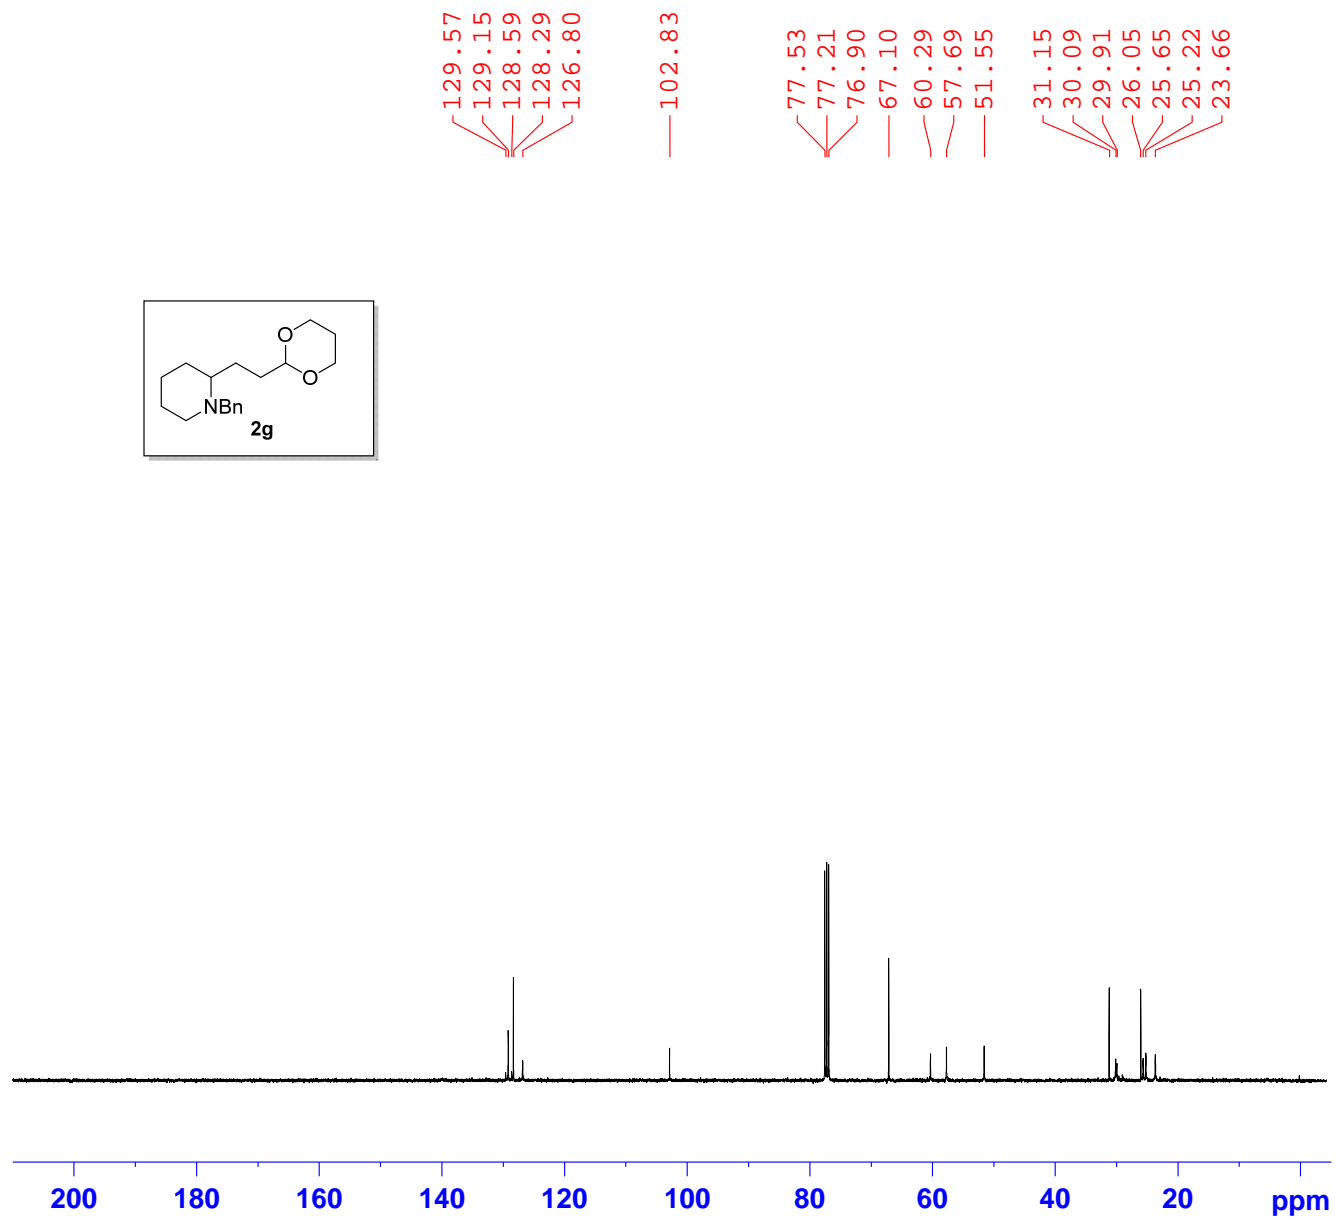

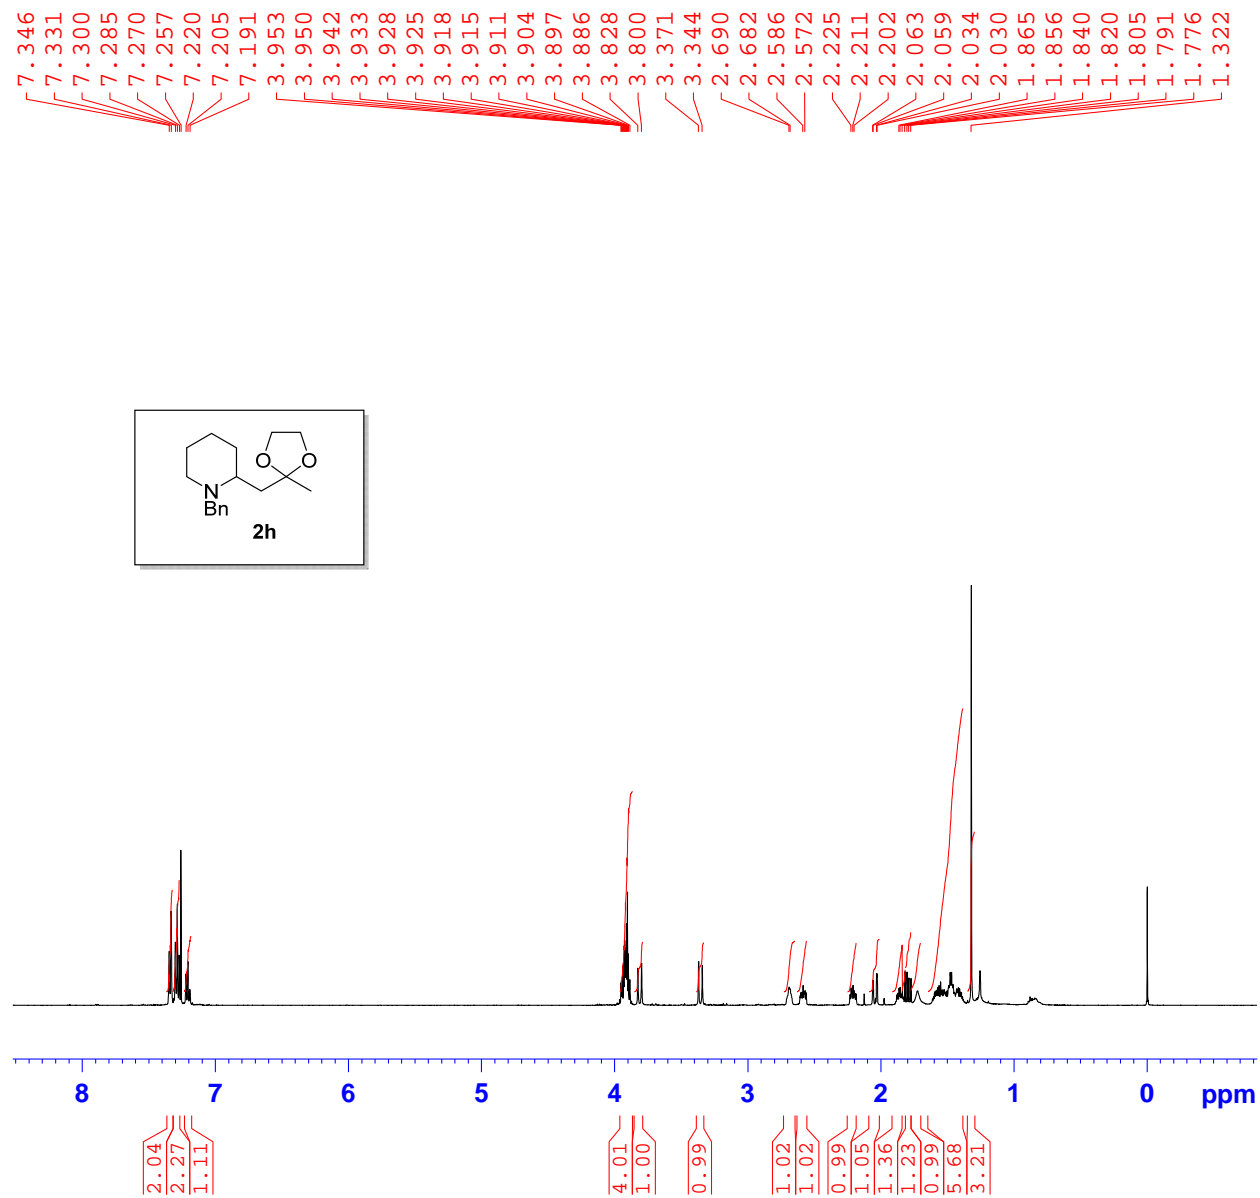

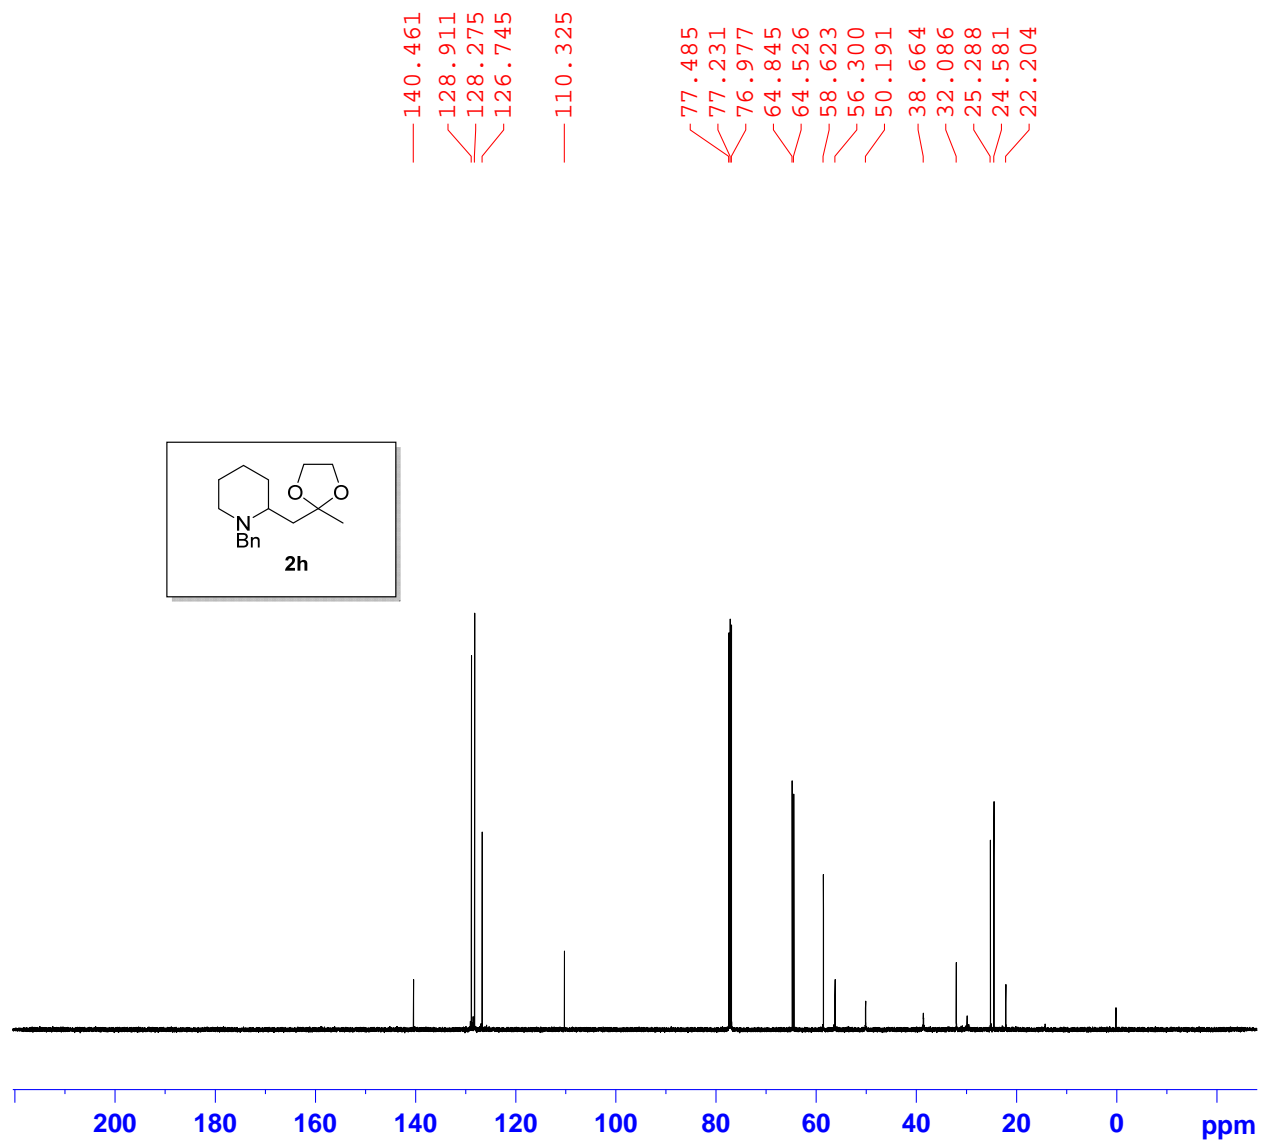

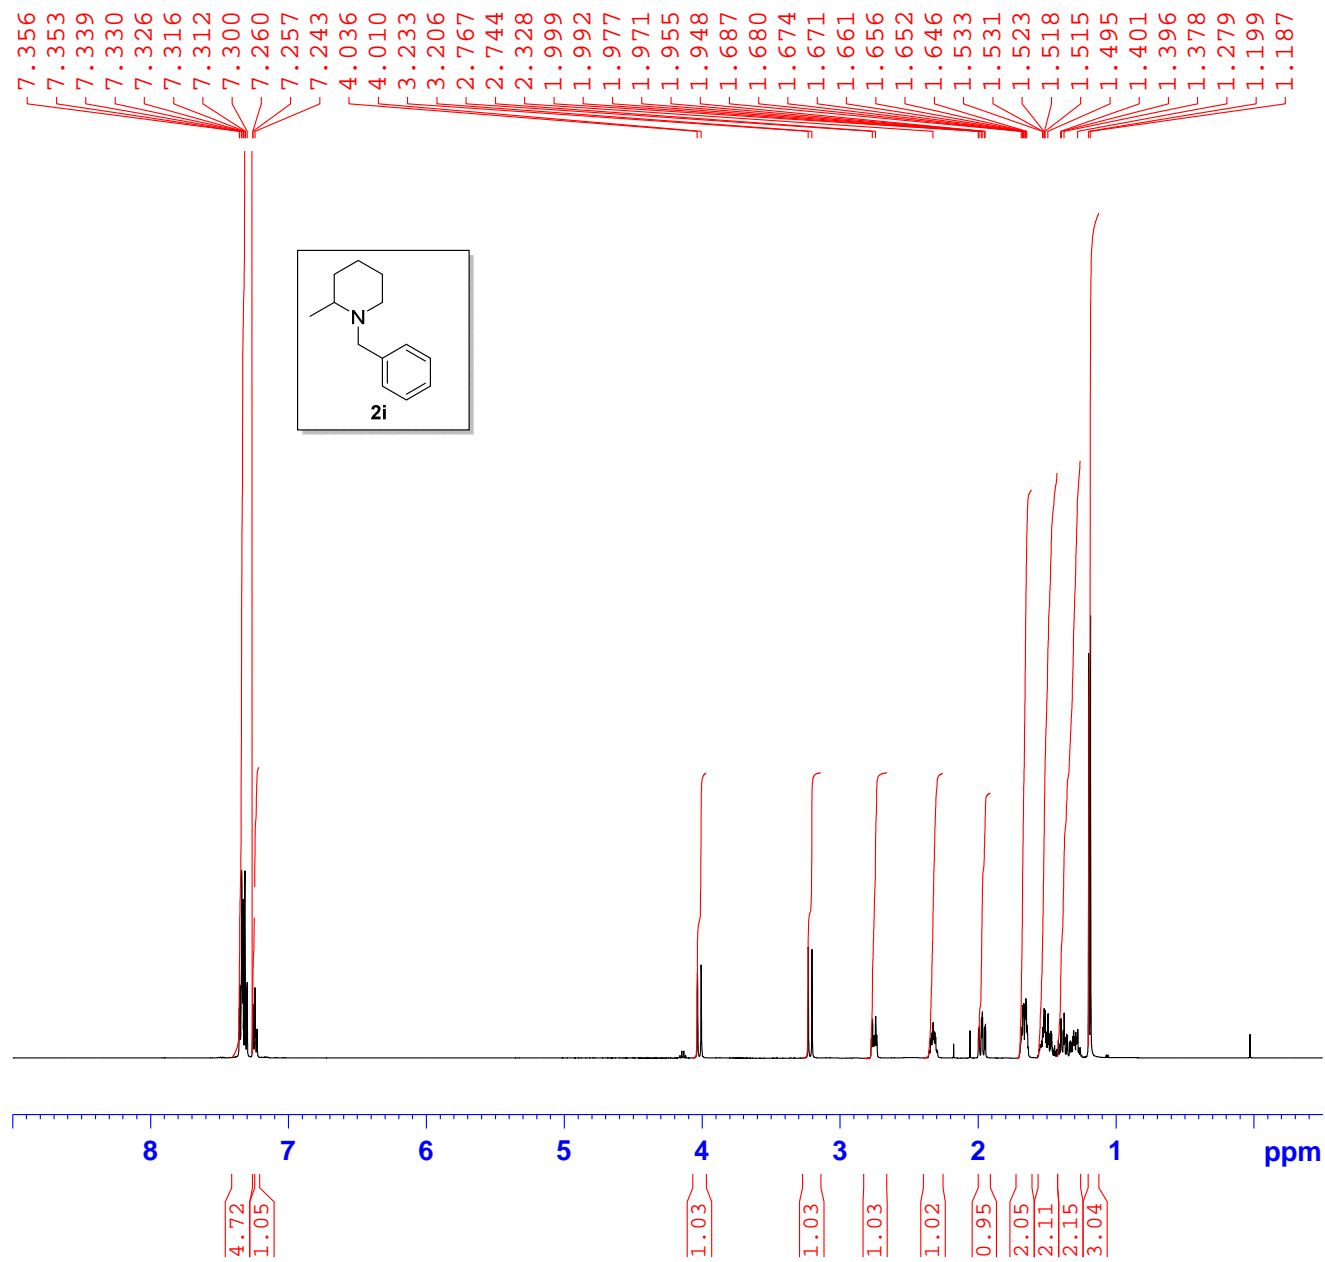

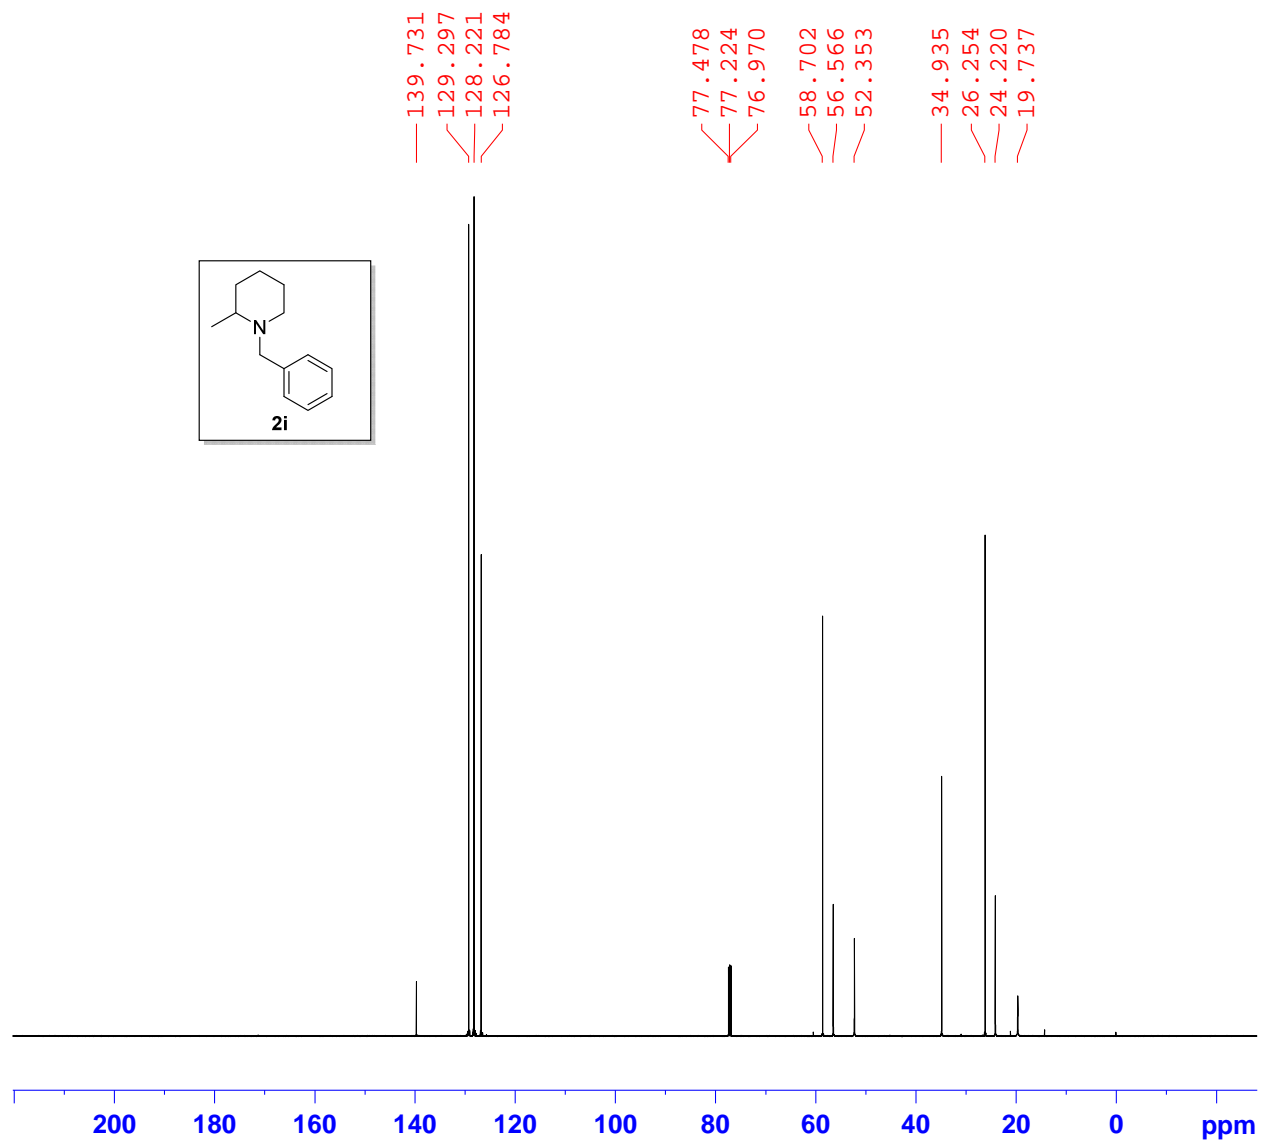

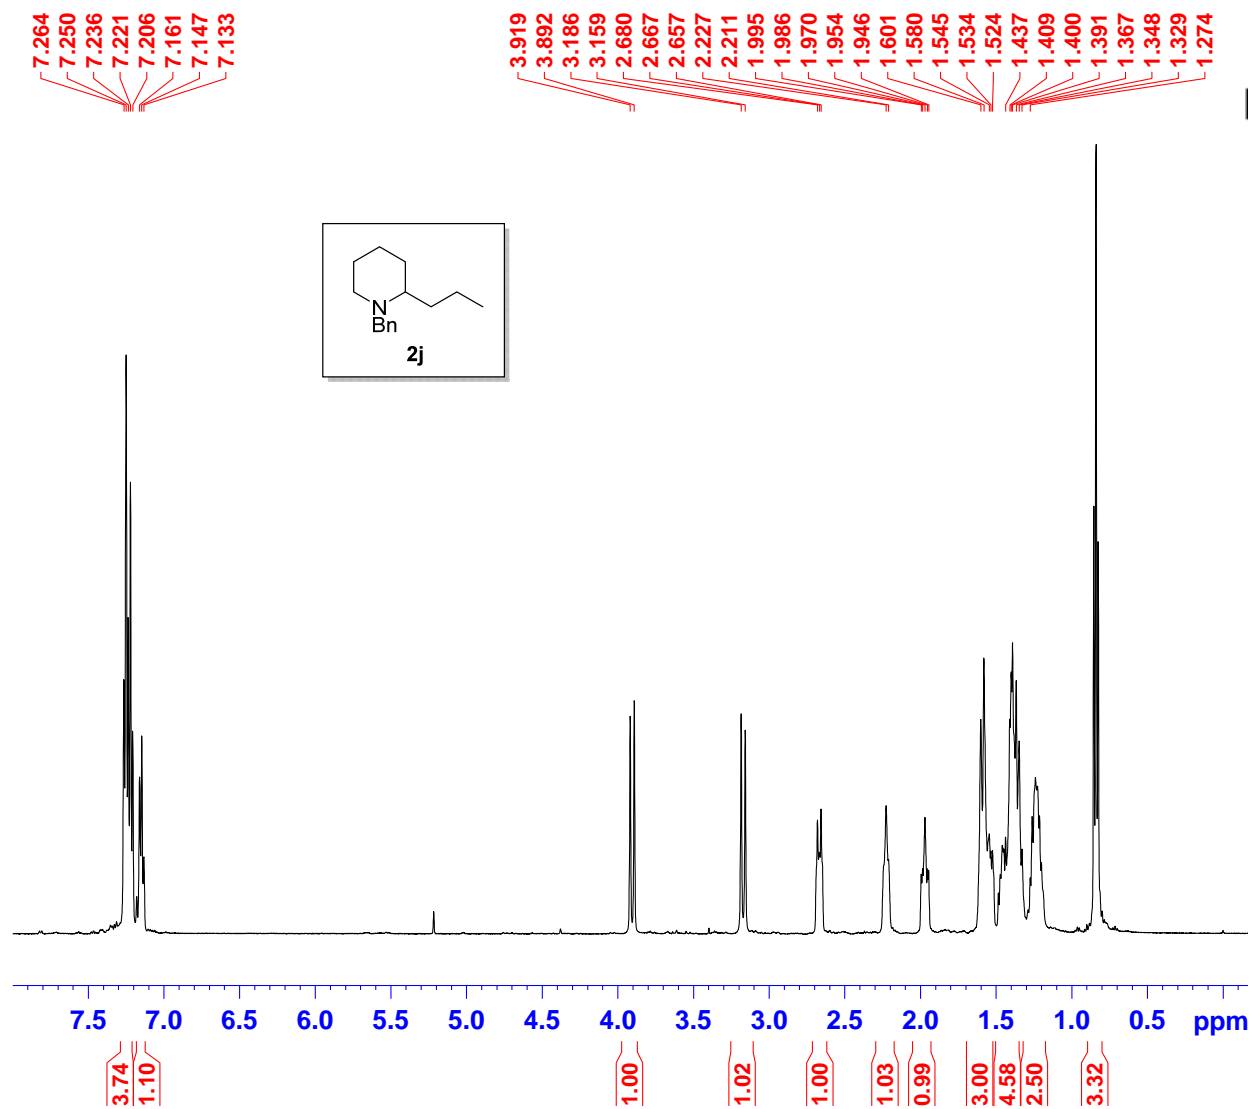

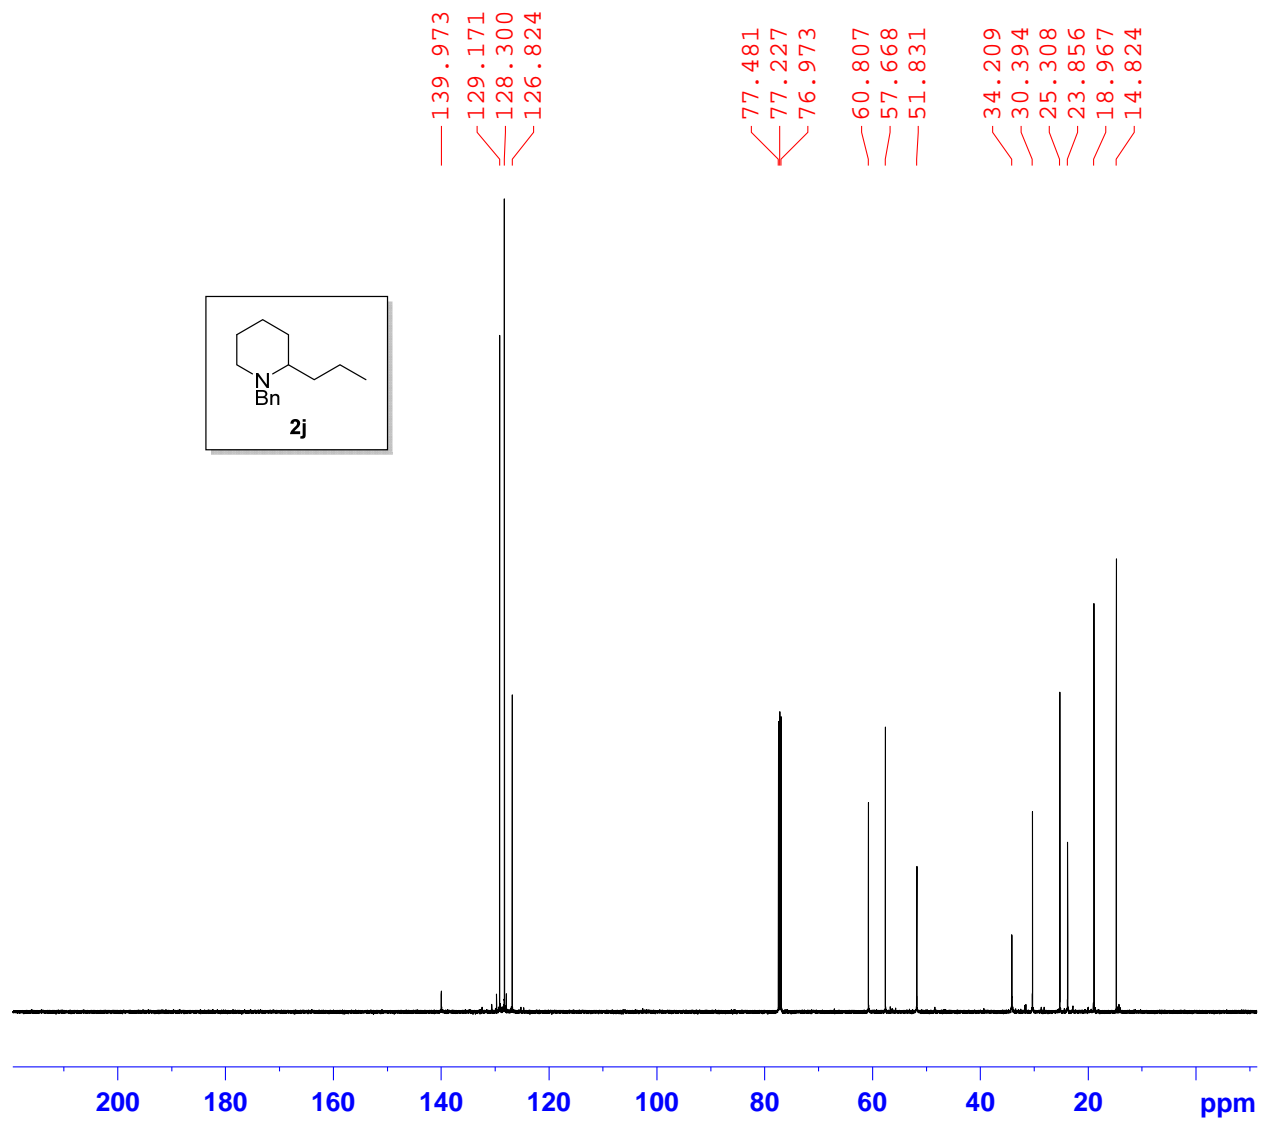

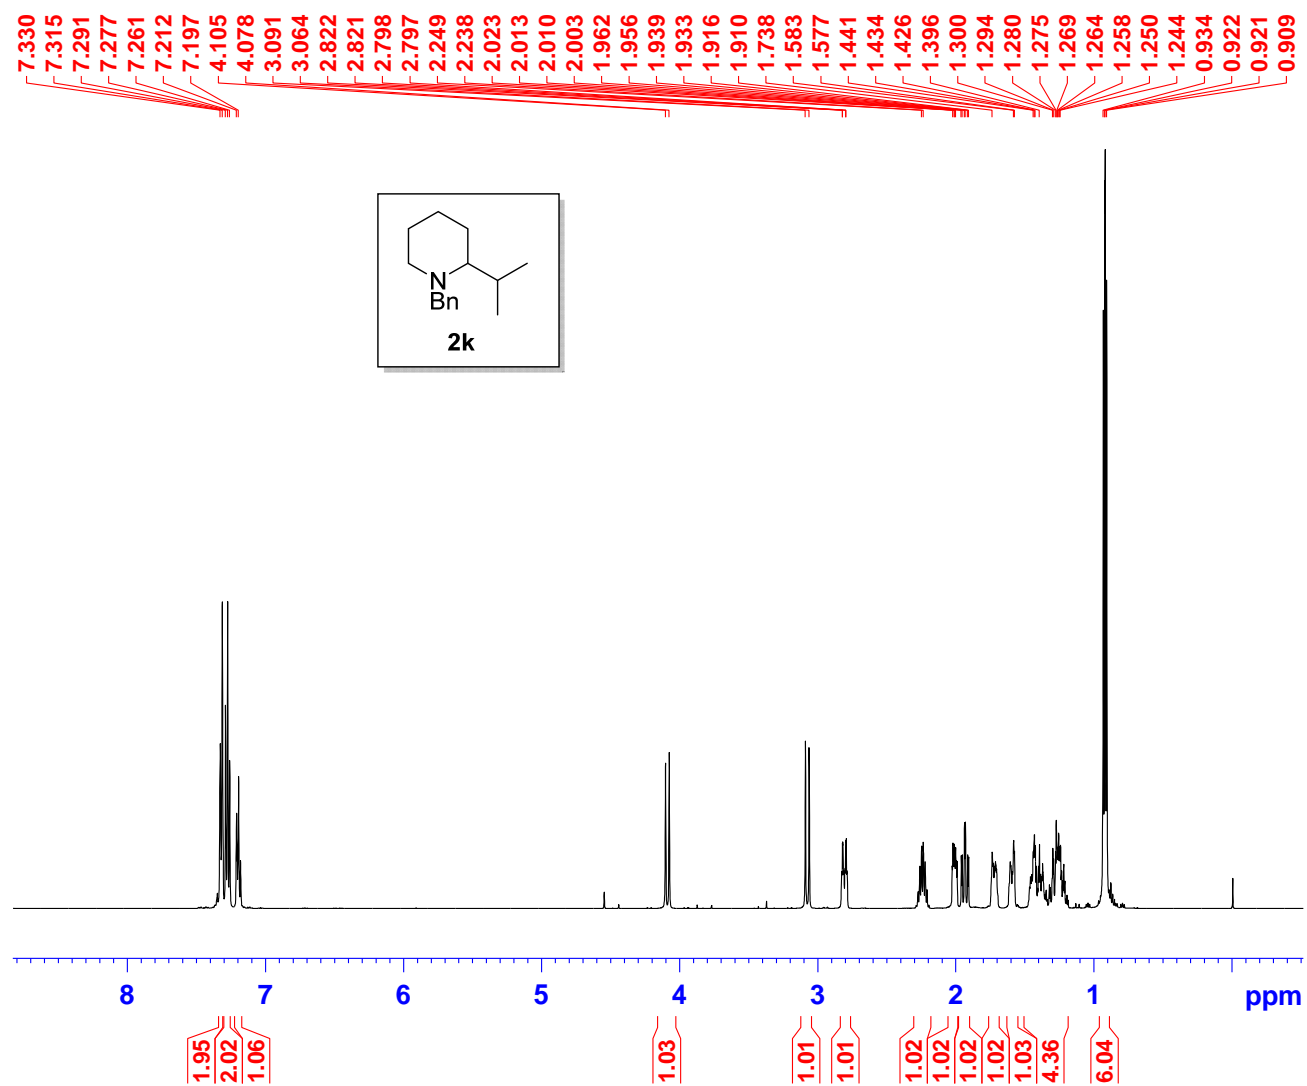



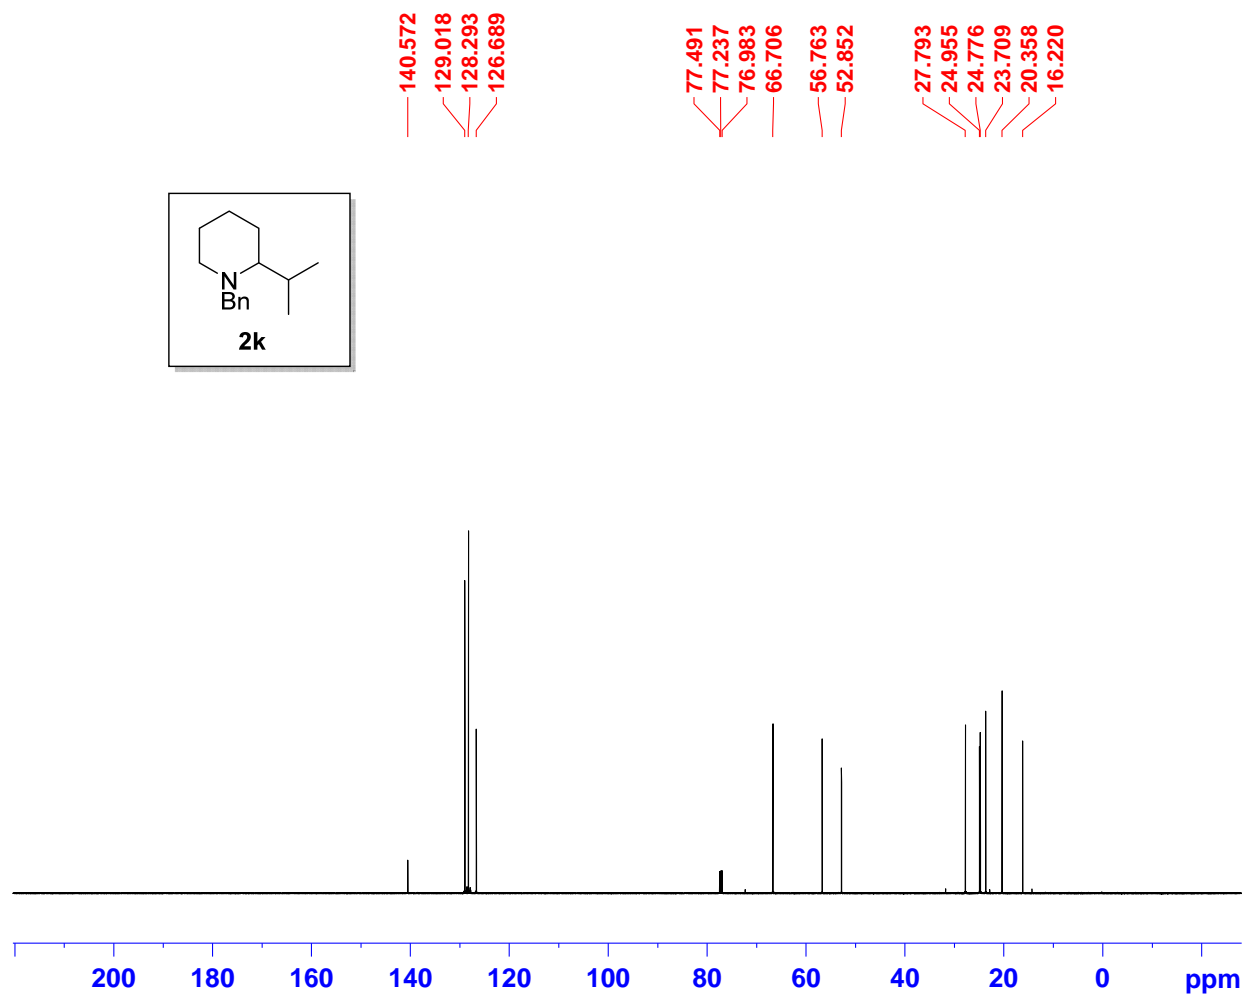

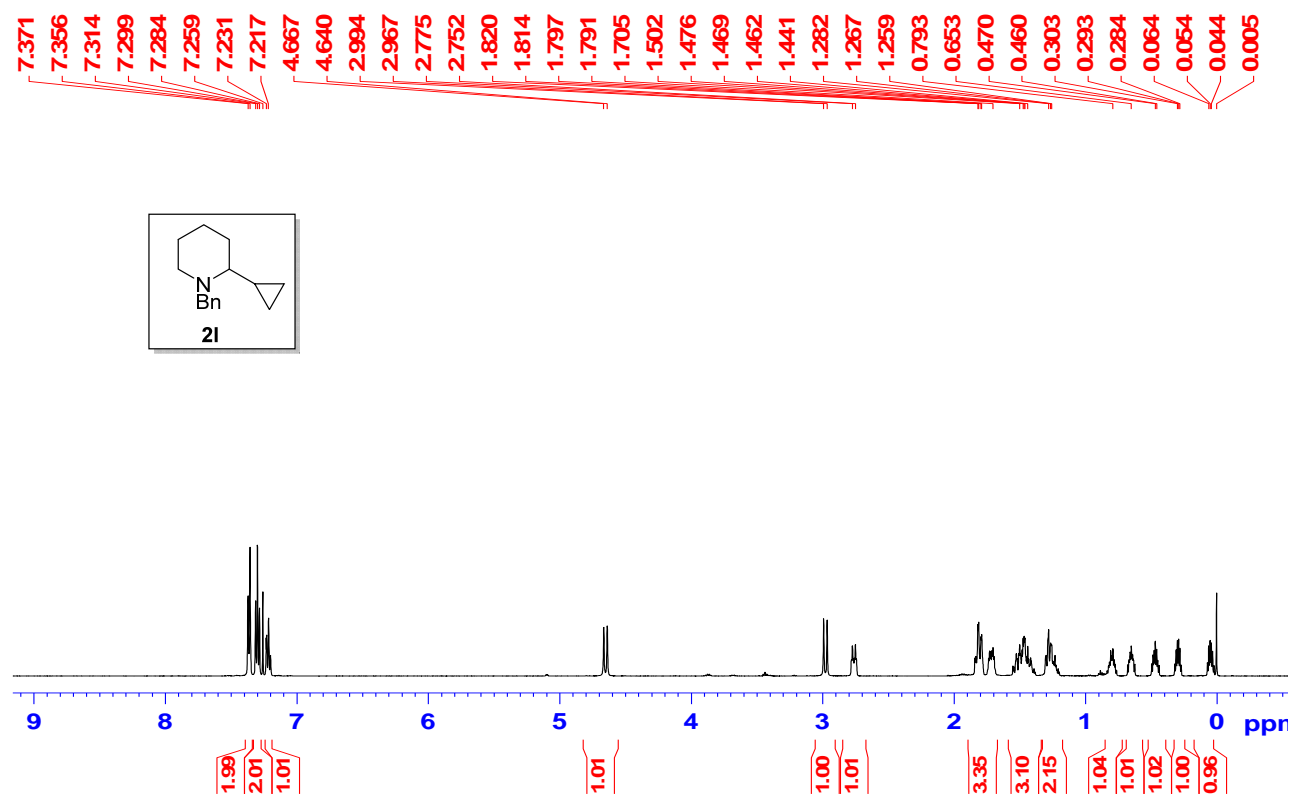

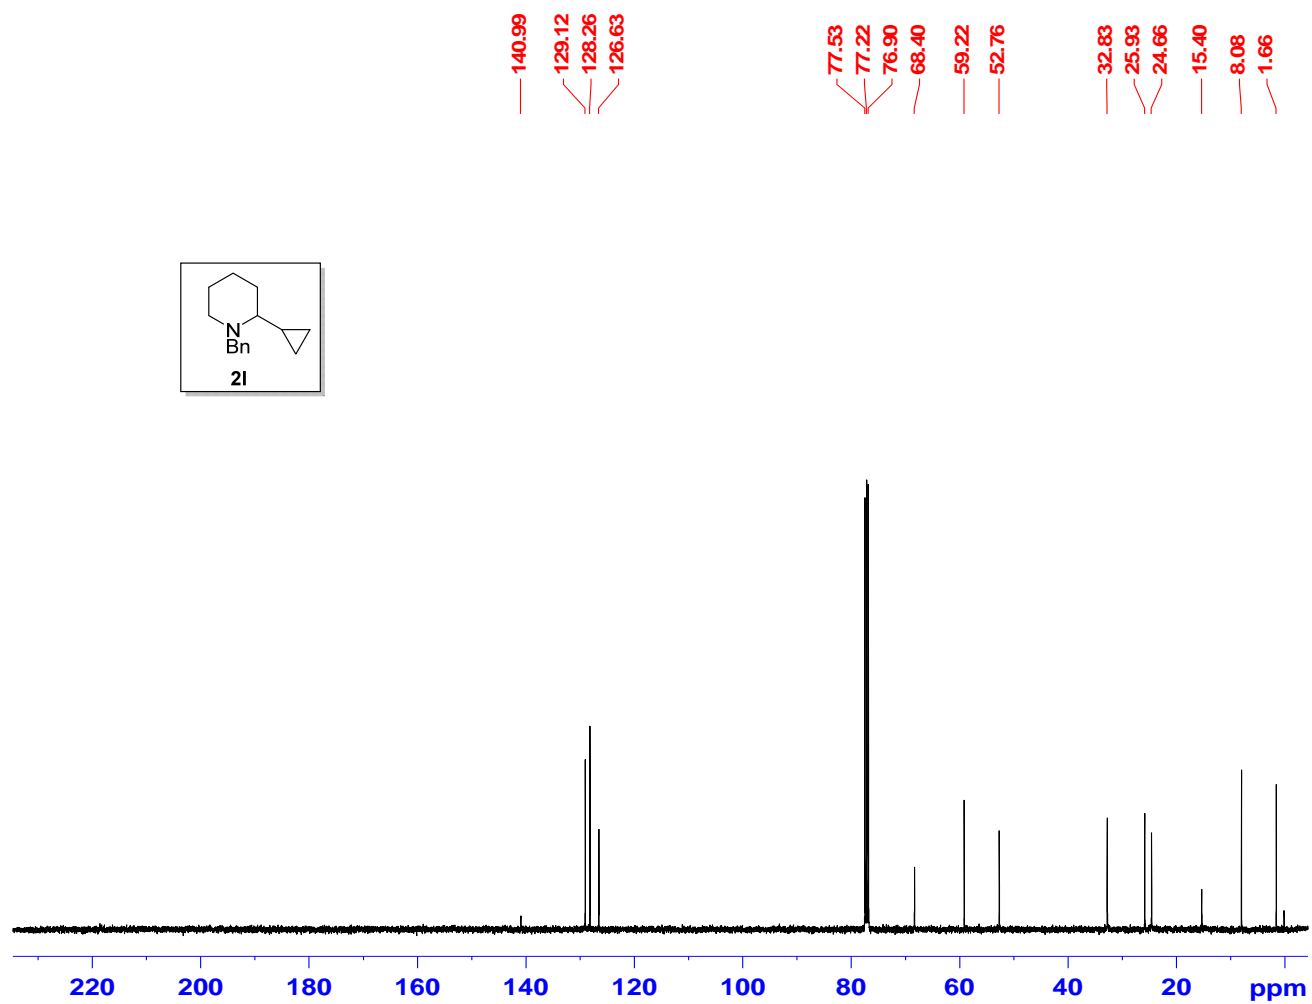

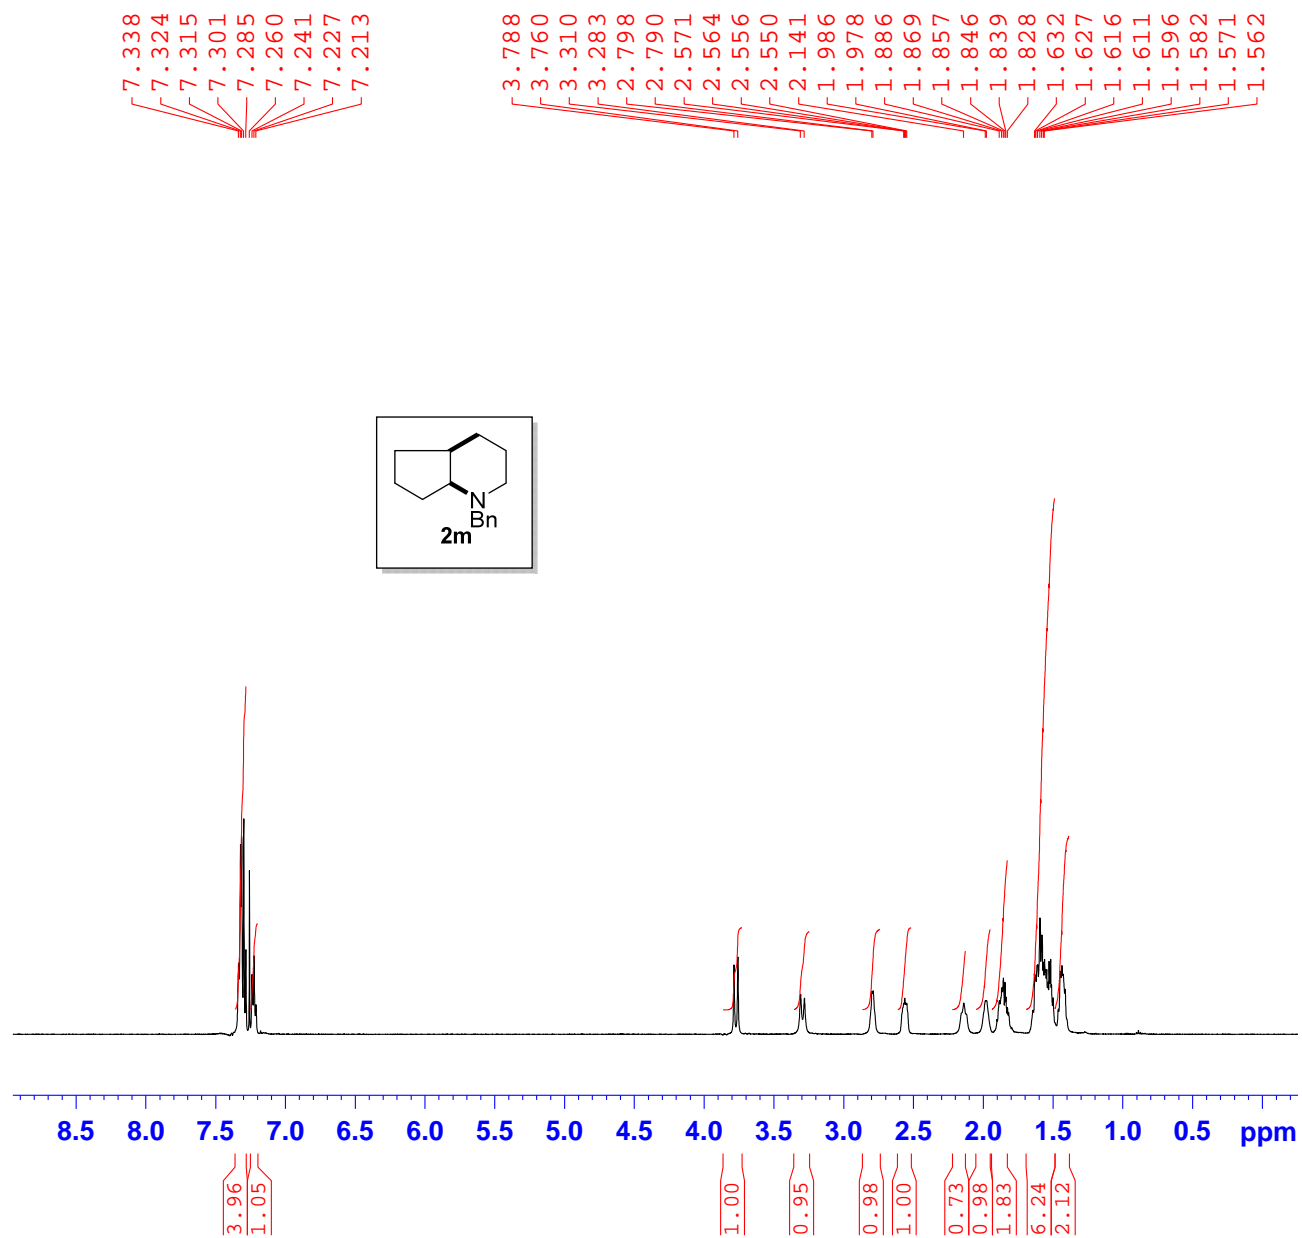

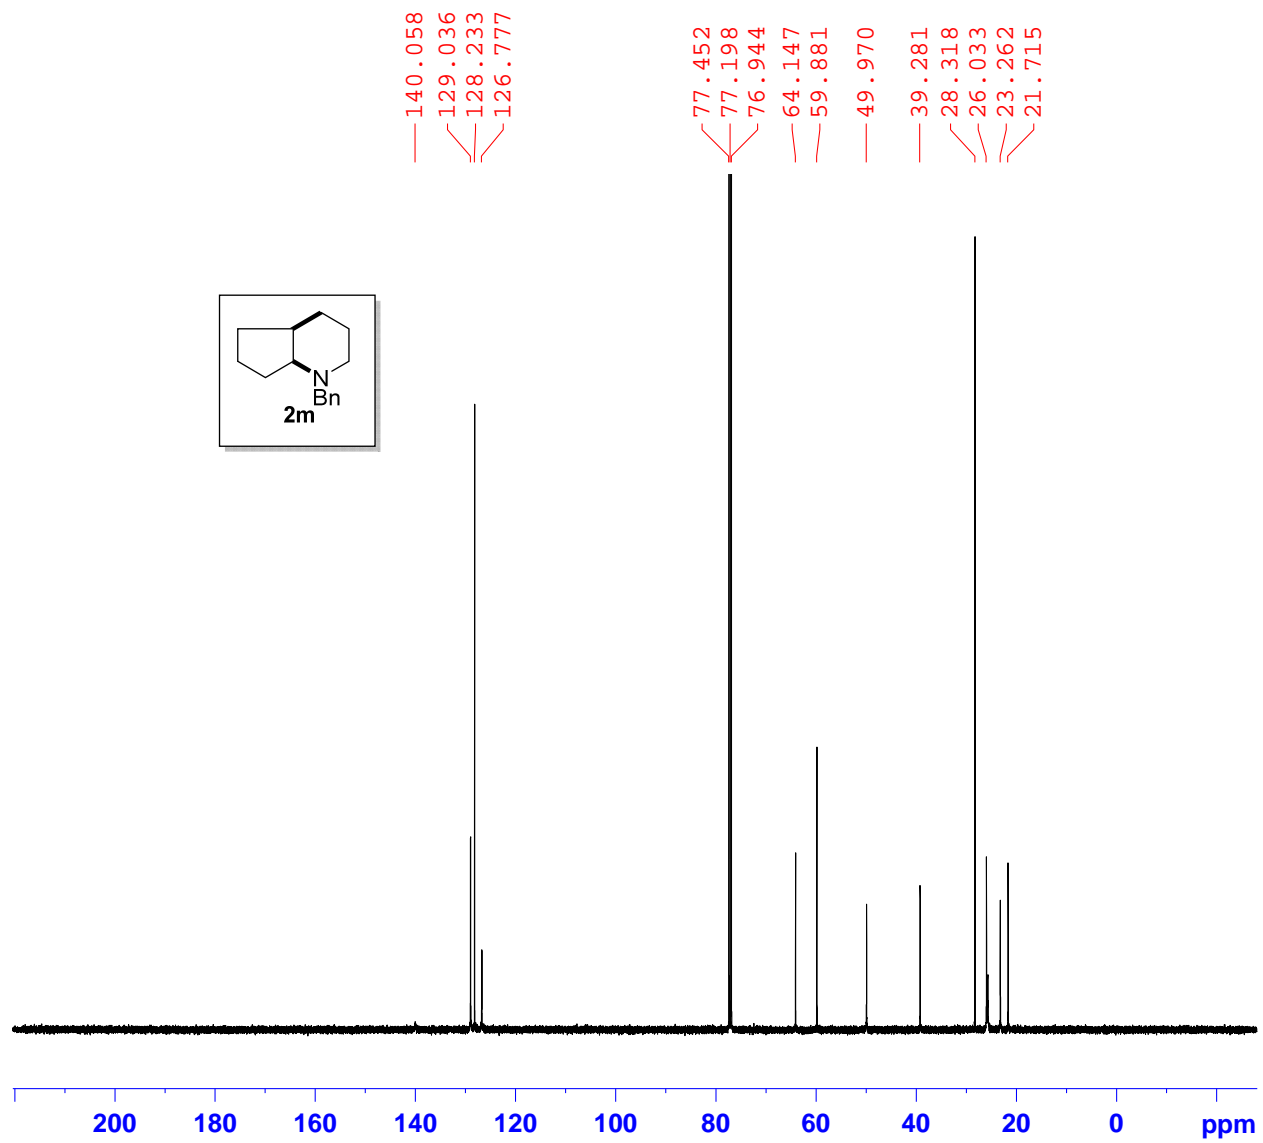

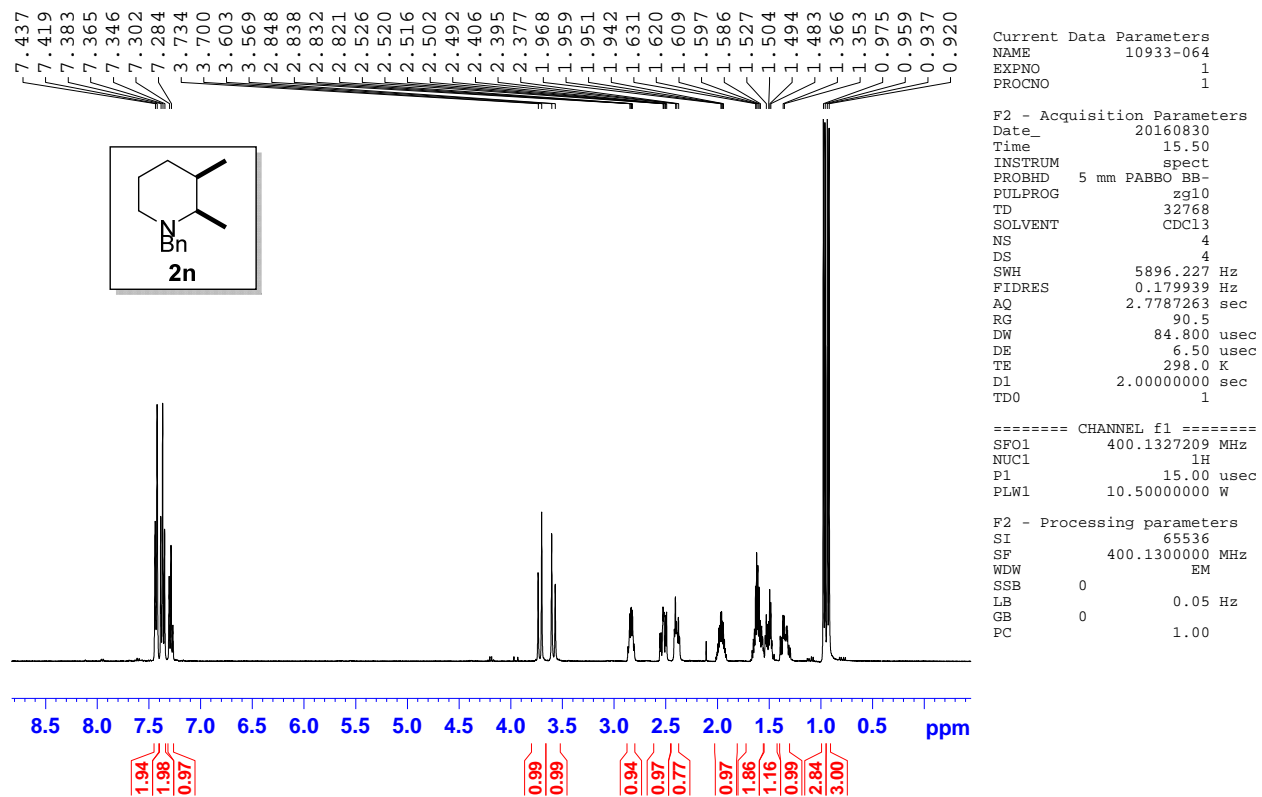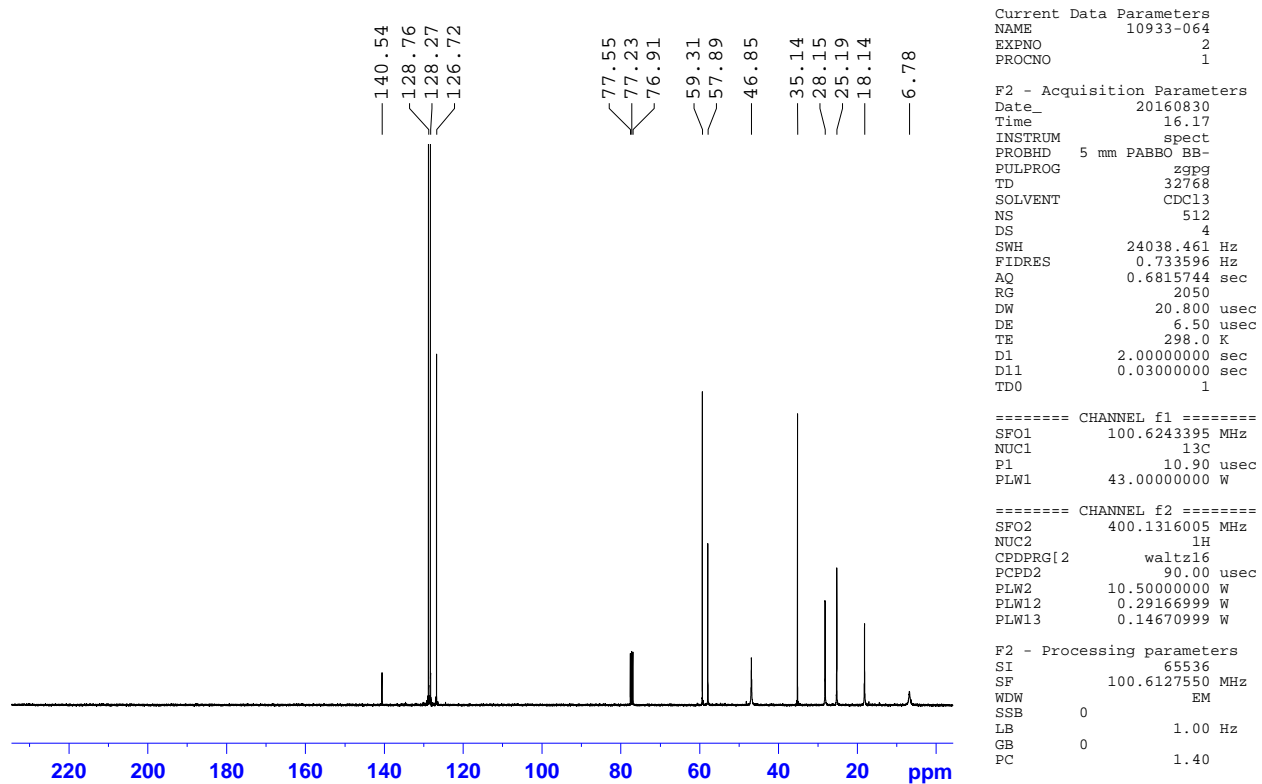

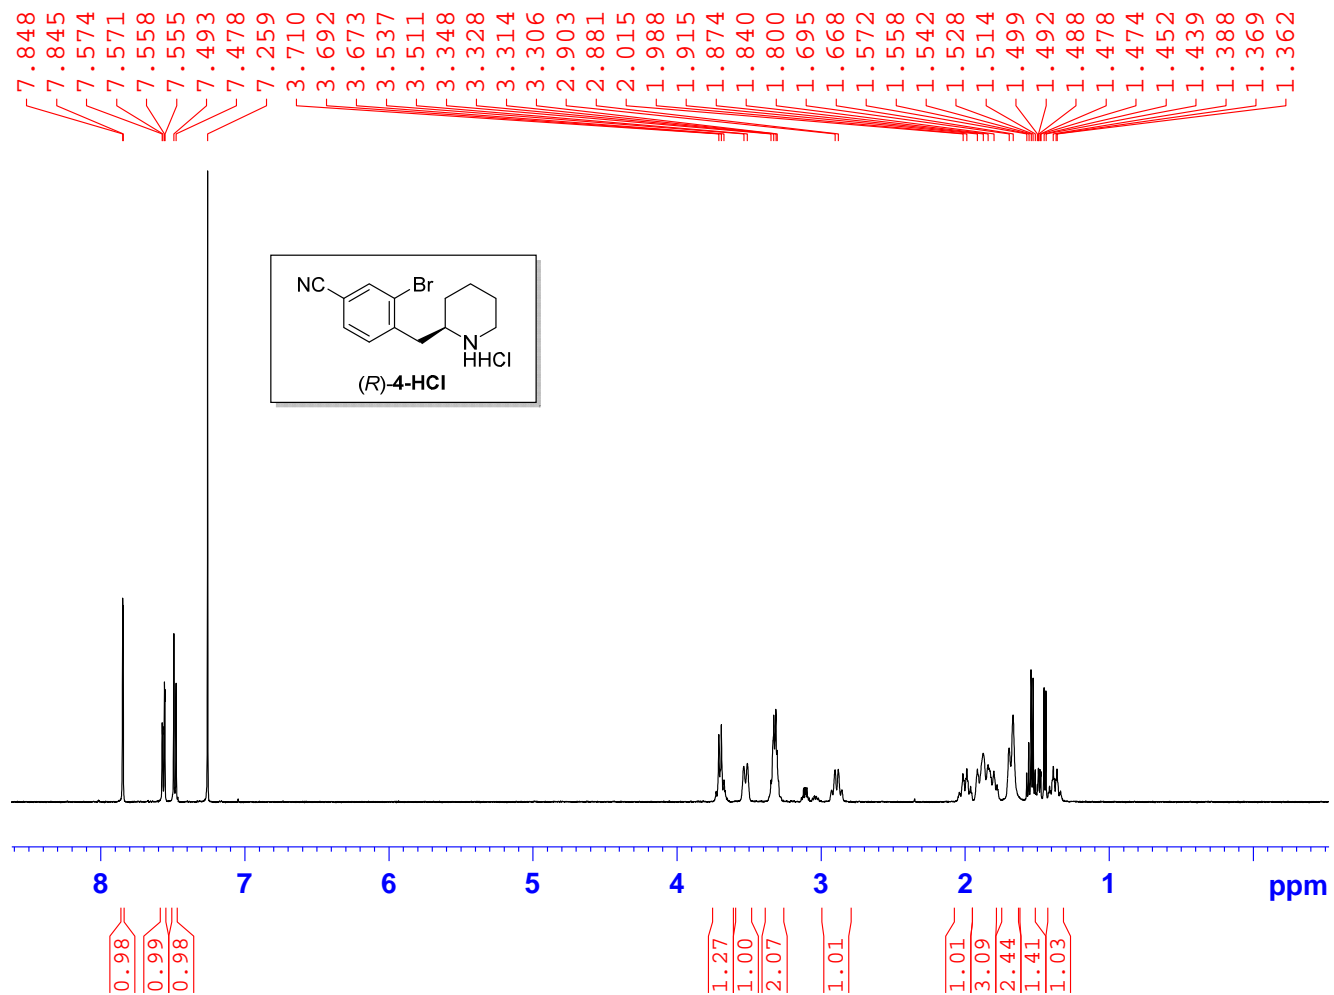

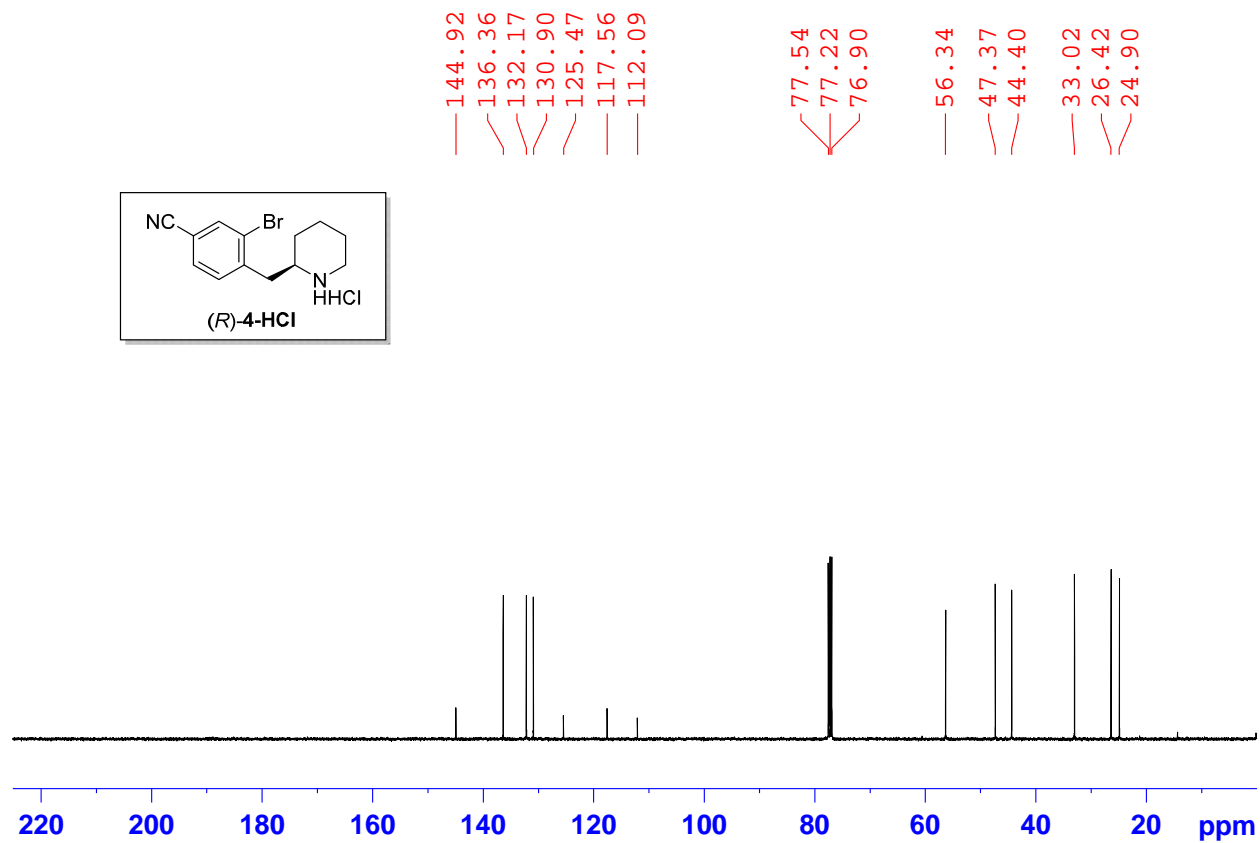



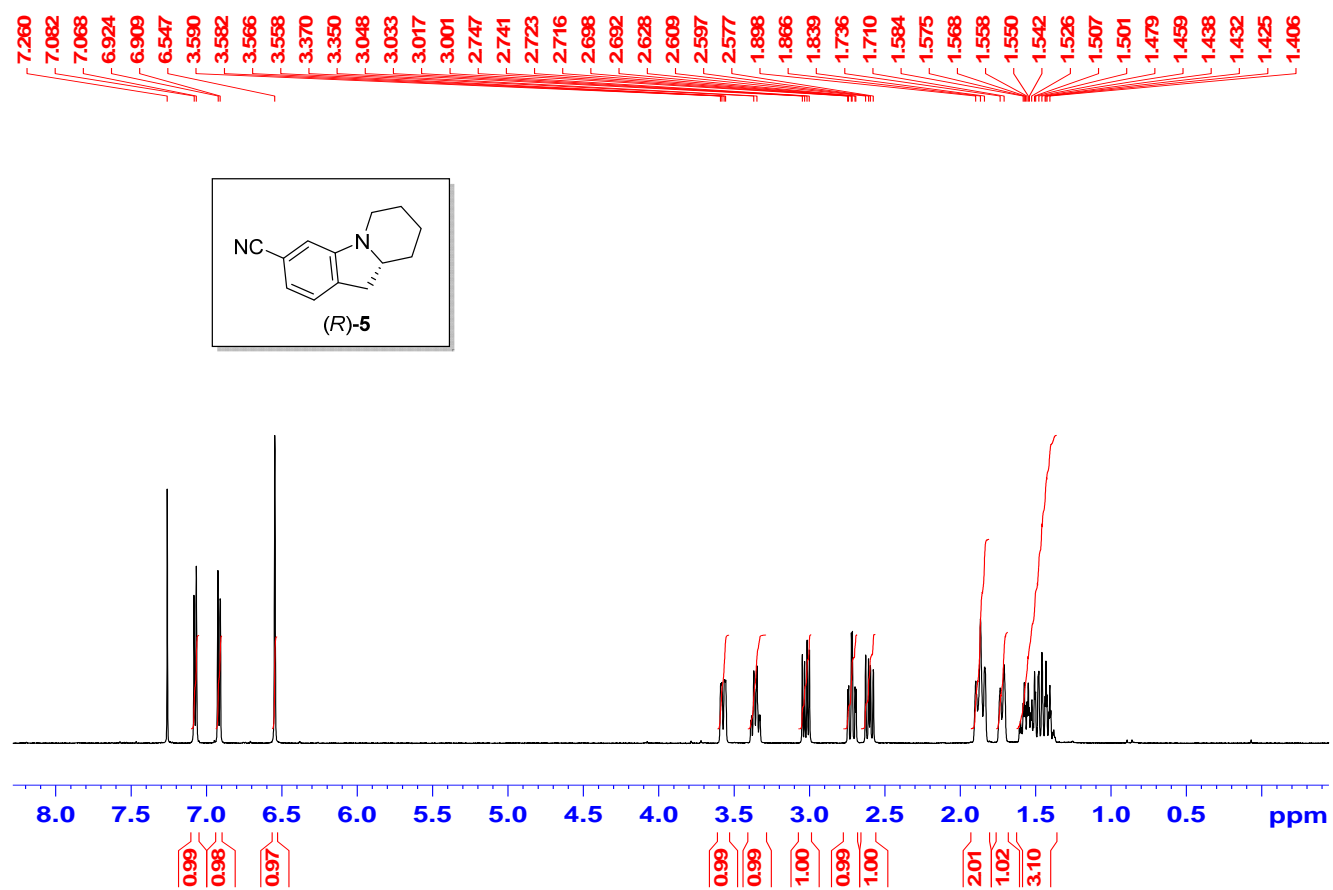

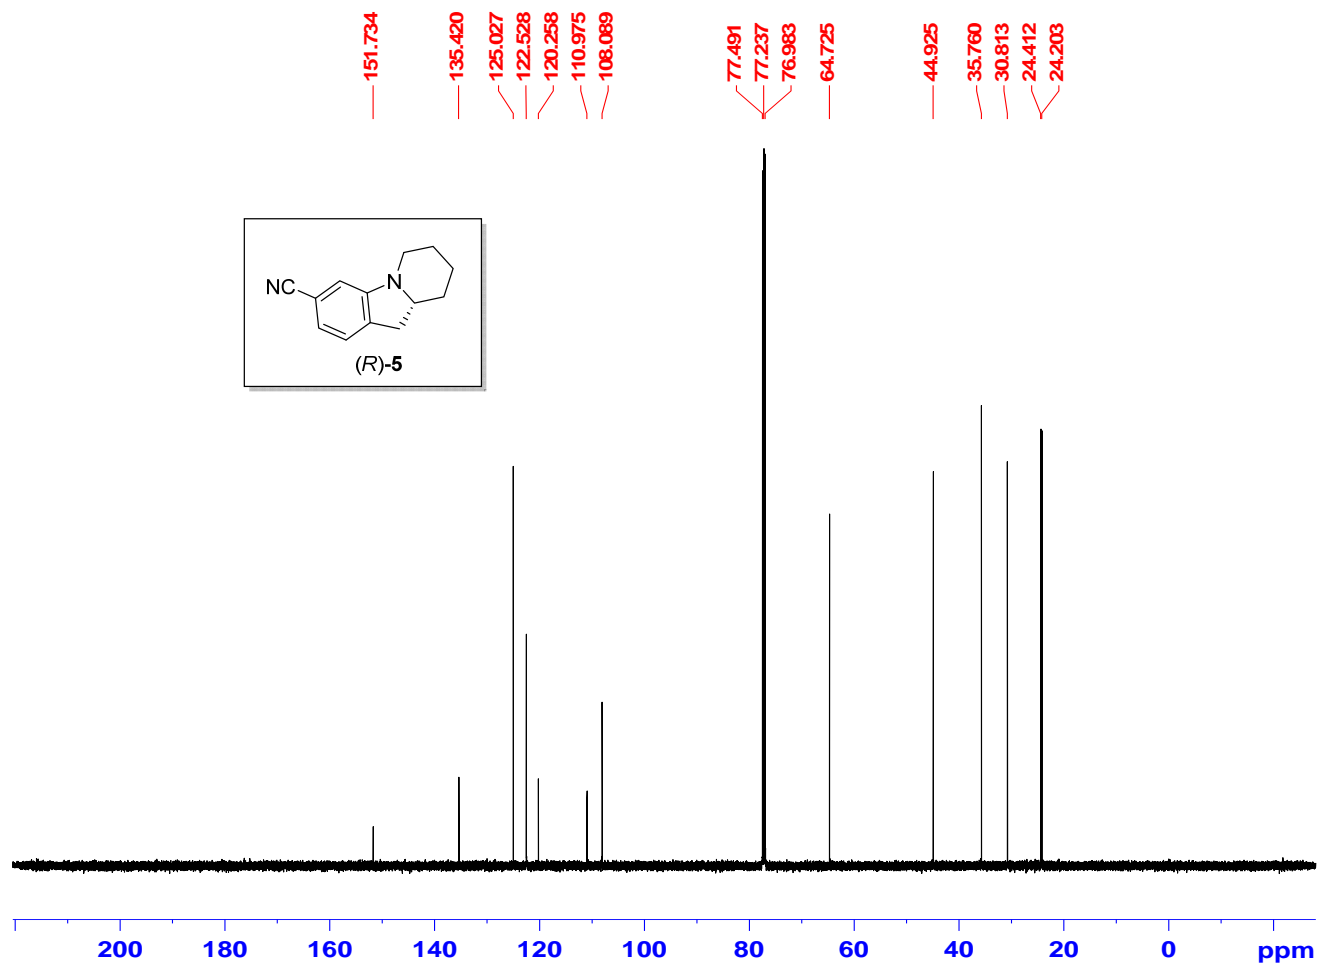

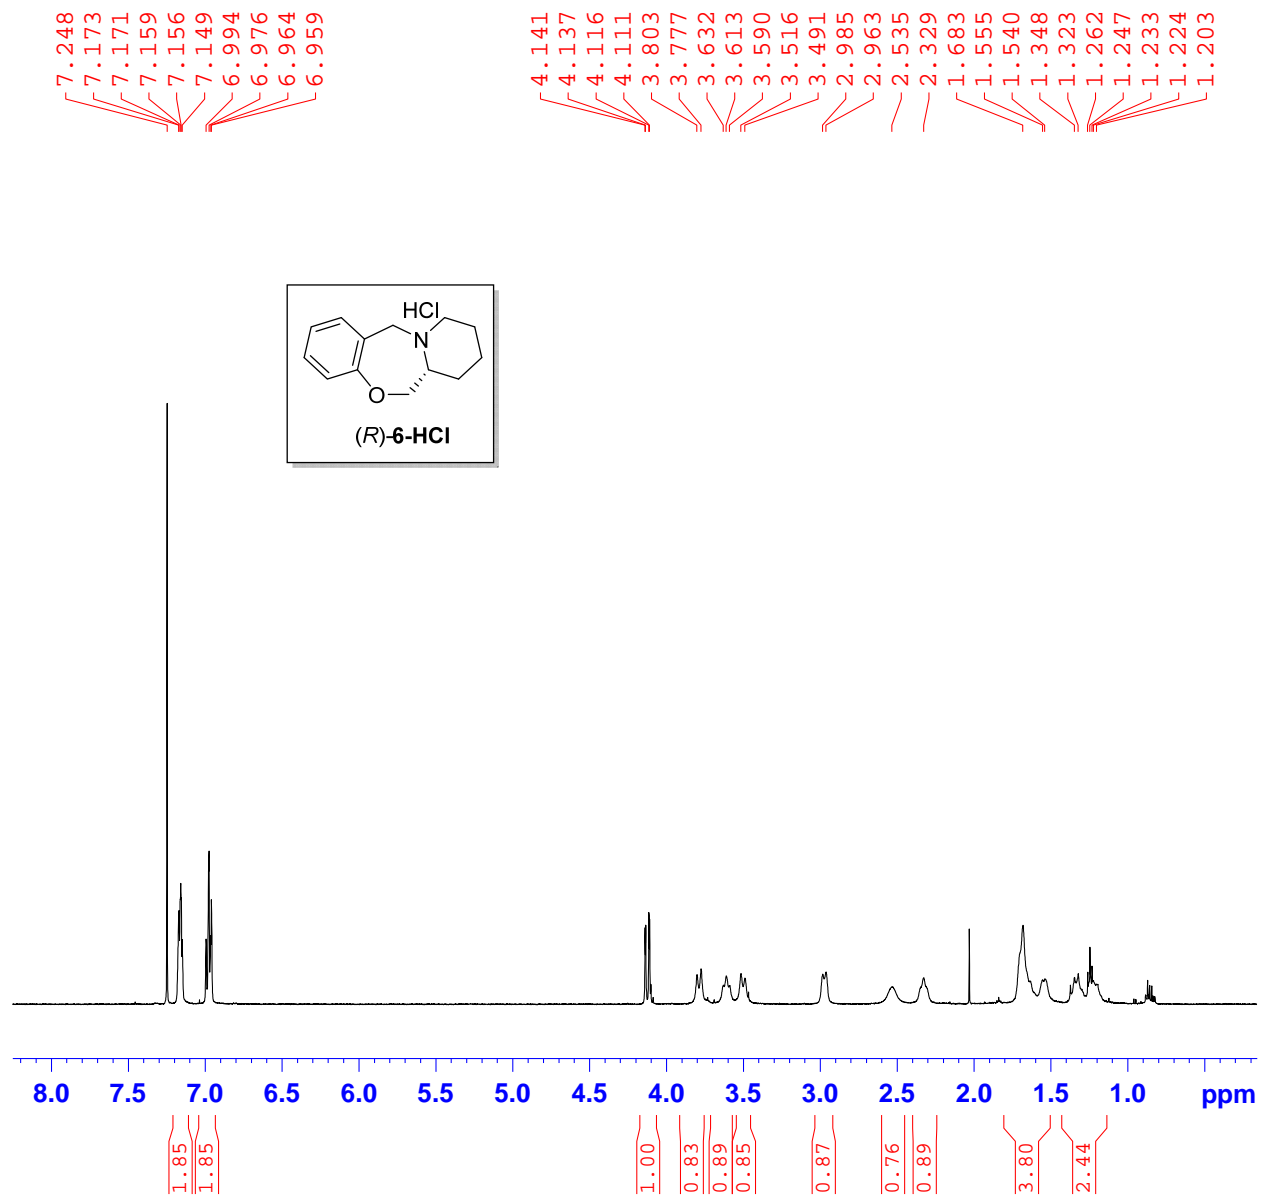

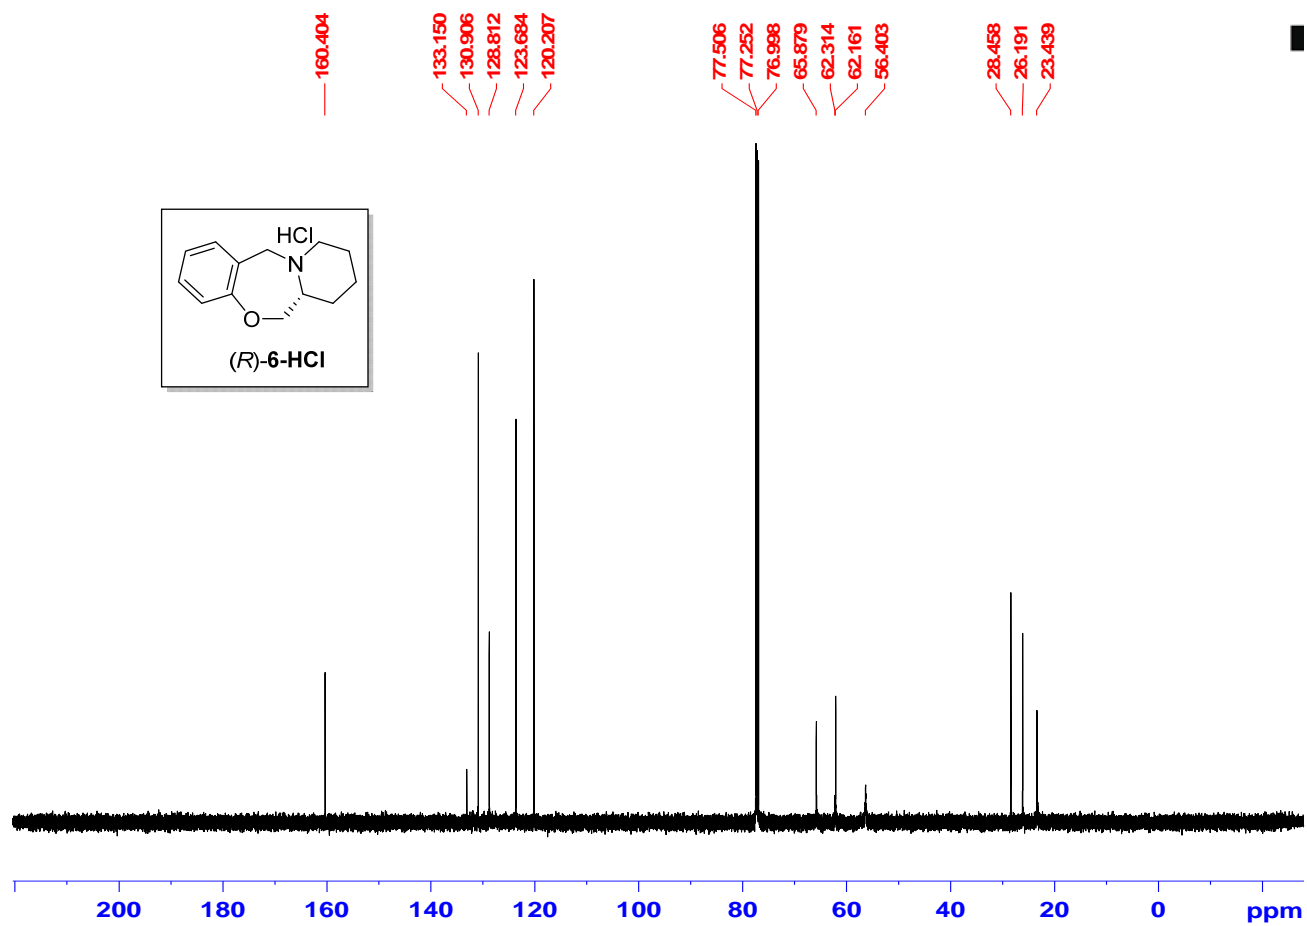

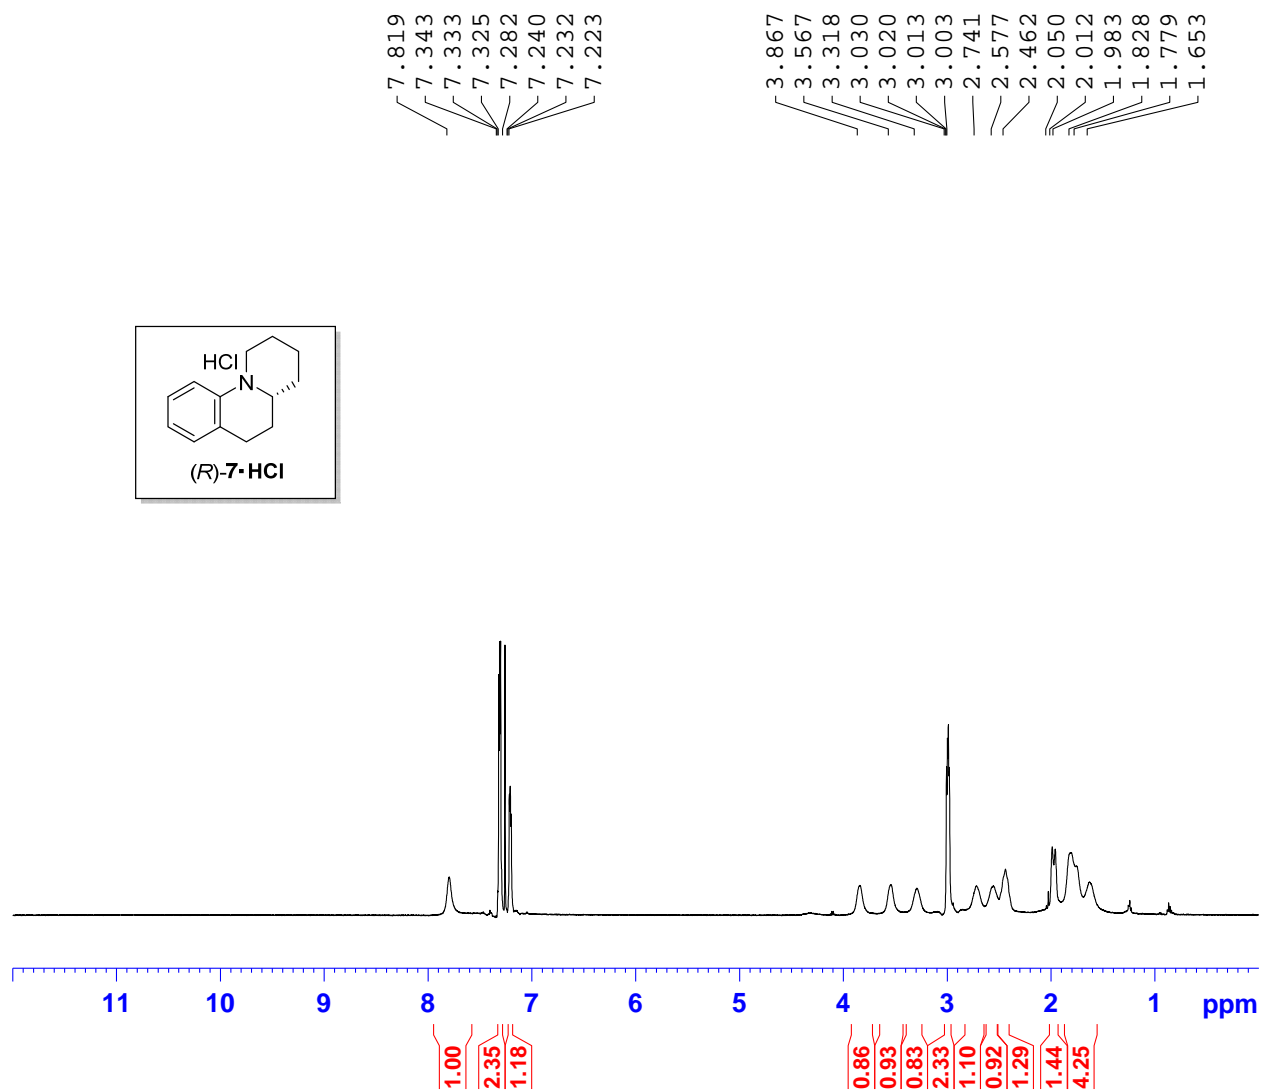

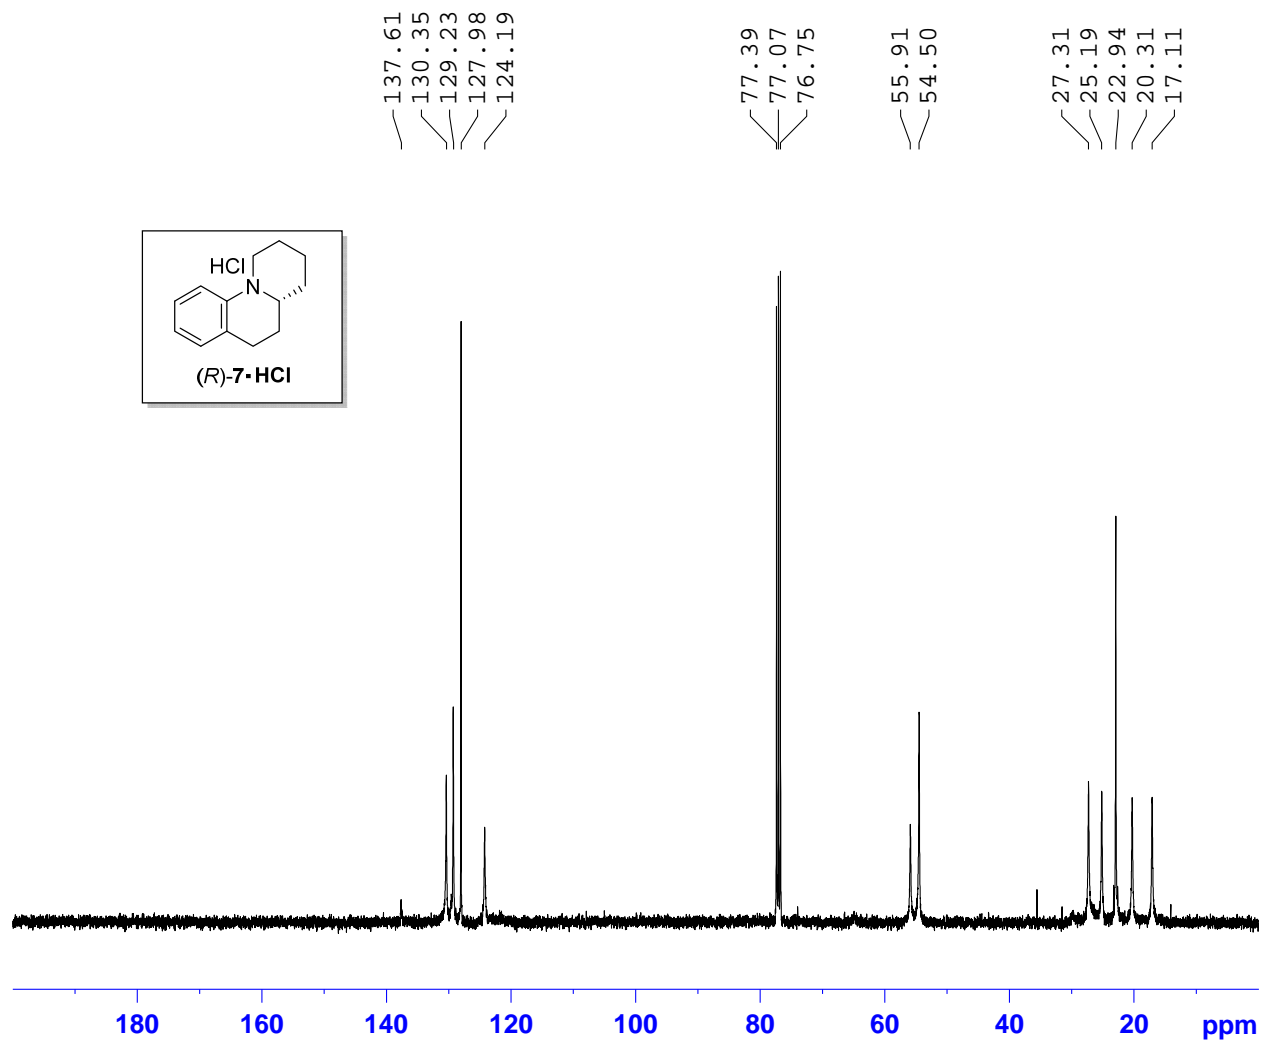

## Chiral HPLC Data

## 1,2-dibenzylpiperidine 2a\*

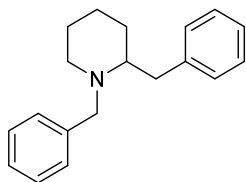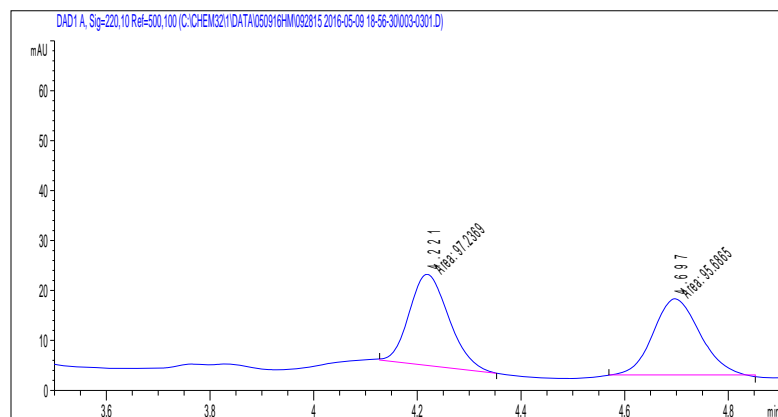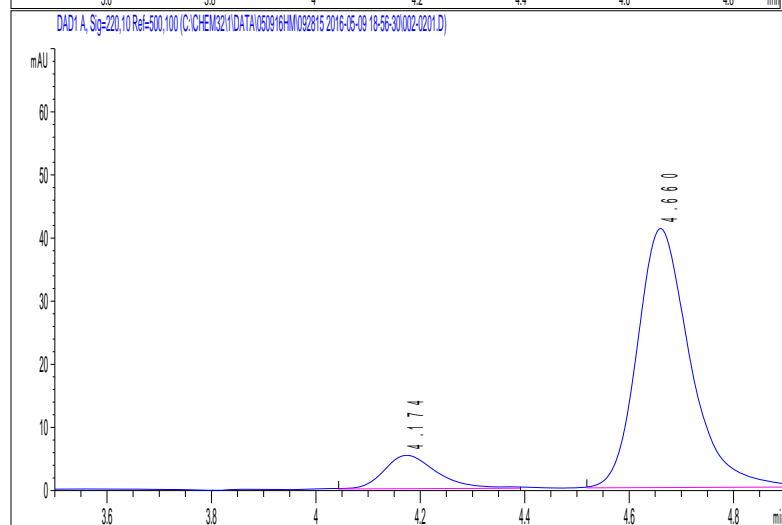

| # | Time  | Area | Height | Width  | Area%  | Symmetry |
|---|-------|------|--------|--------|--------|----------|
| 1 | 4.174 | 31.7 | 5      | 0.1049 | 9.819  | 0.836    |
| 2 | 4.66  | 291  | 41.2   | 0.1178 | 90.181 | 0.785    |

\* For this HPLC spectrum, the sample was prepared from the reaction using the (*R,R*)-MeO-BoQPhos ligand. The major isomer at  $t = 4.66$  min is the (*S*)-isomer.

**4-((1-benzylpiperidinyl)methyl)-3-bromobenzonitrile 2b**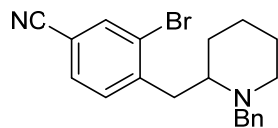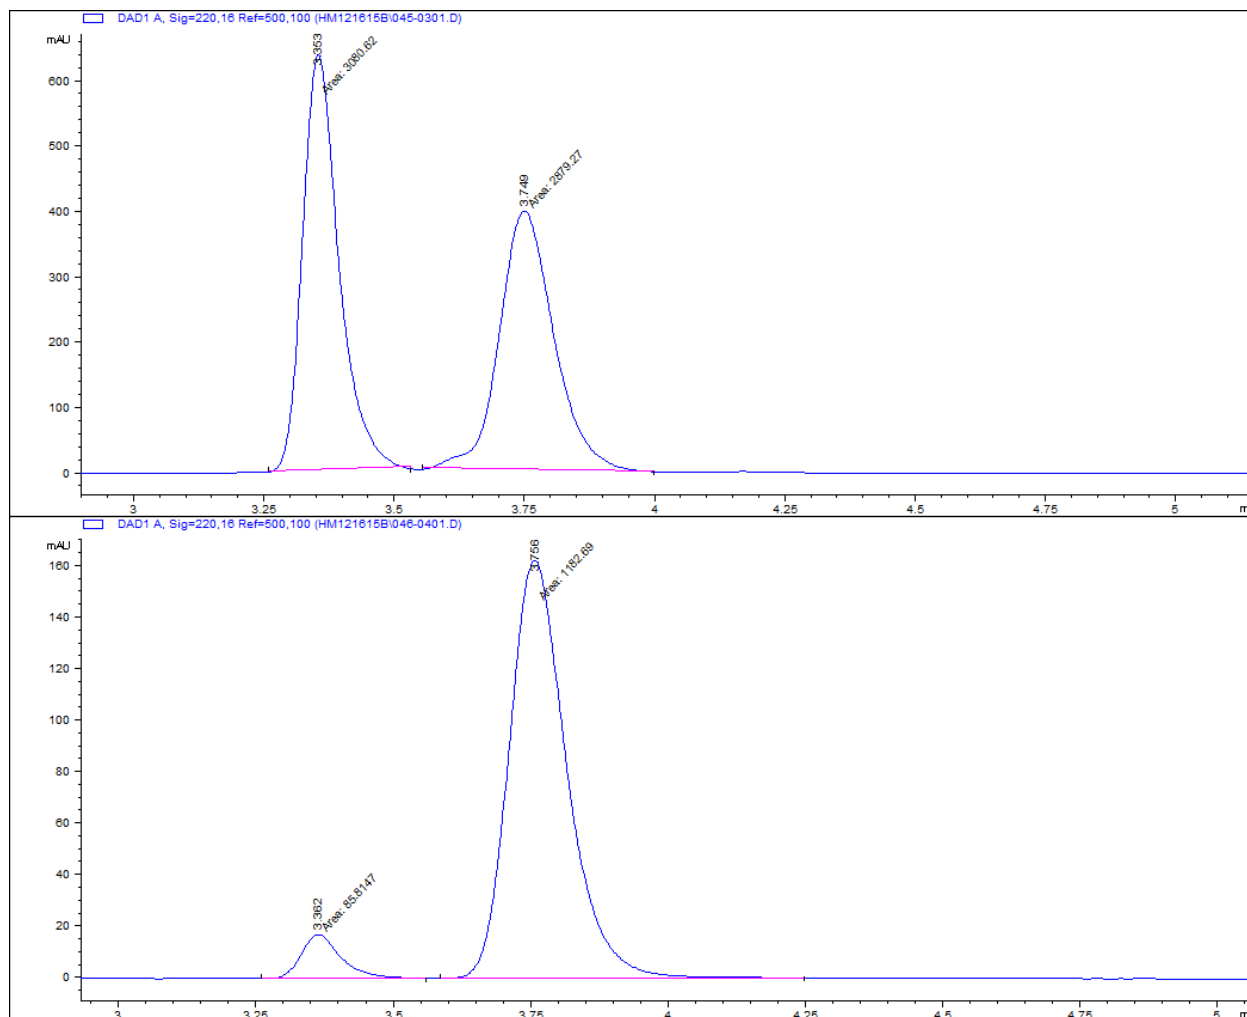

| # | Time  | Area | Height | Width  | Area%  | Symmetry |
|---|-------|------|--------|--------|--------|----------|
| 1 | 3.362 | 85.8 | 17.1   | 0.0839 | 6.763  | 0.722    |
| 2 | 3.756 | 1183 | 162.5  | 0.1213 | 93.237 | 0.761    |



**2-benzhydryl-1-benzylpiperidine 2c**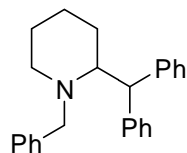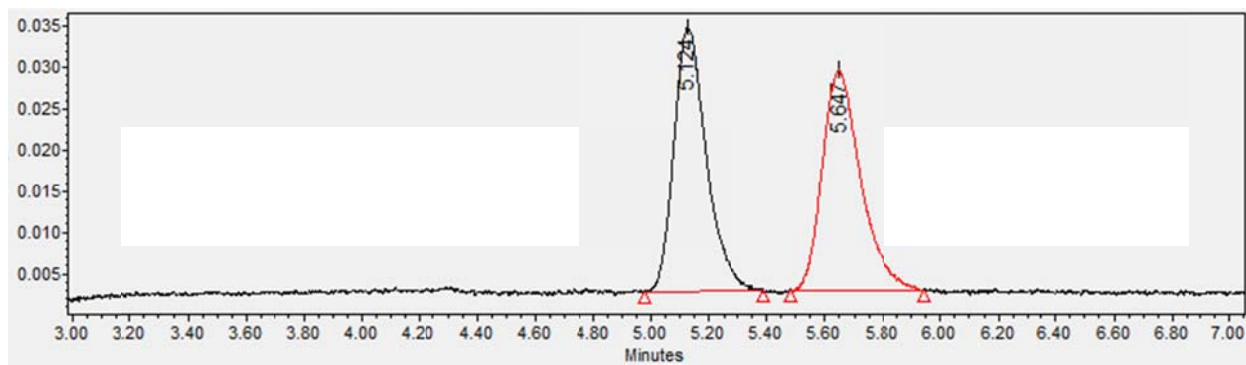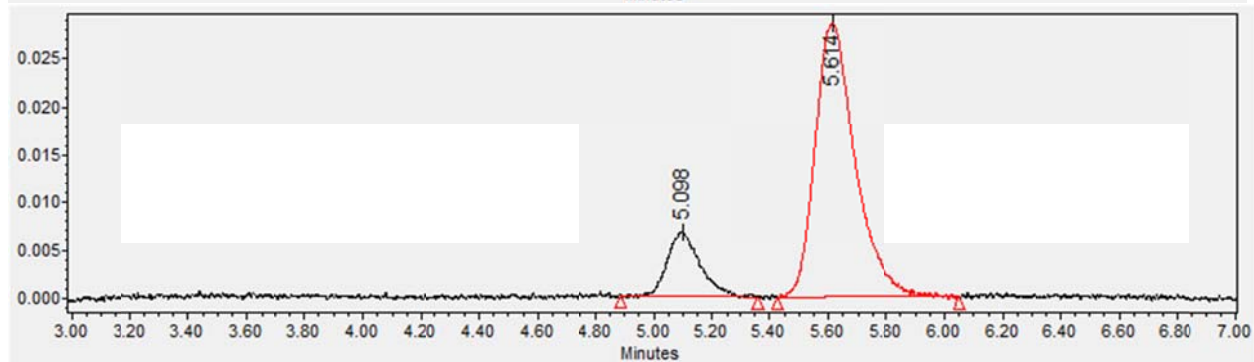

|   | RT    | Area   | % Area | Height |
|---|-------|--------|--------|--------|
| 1 | 5.098 | 51057  | 15.79  | 6816   |
| 2 | 5.614 | 272262 | 84.21  | 28644  |

**1-(2-bromobenzyl)-2-(((tert-butyldimethylsilyl)oxy)methyl)piperidine 2d**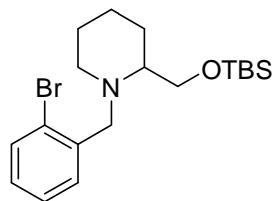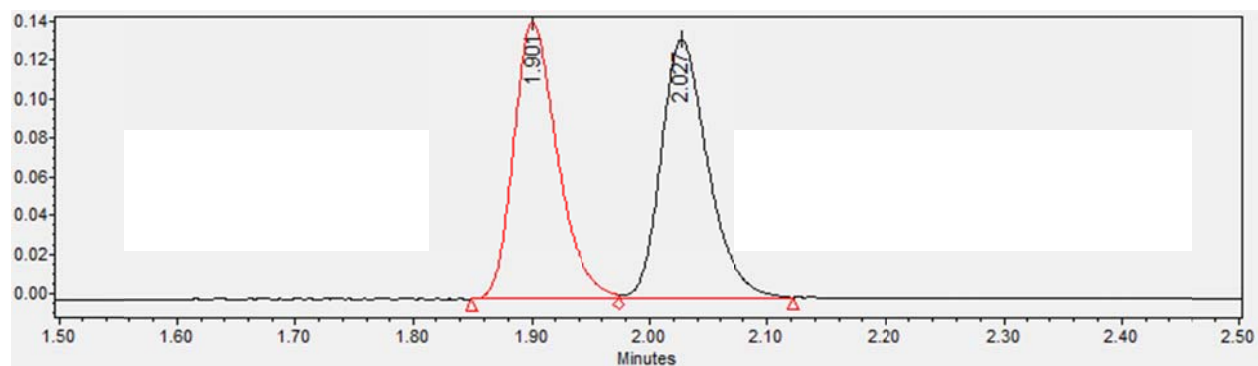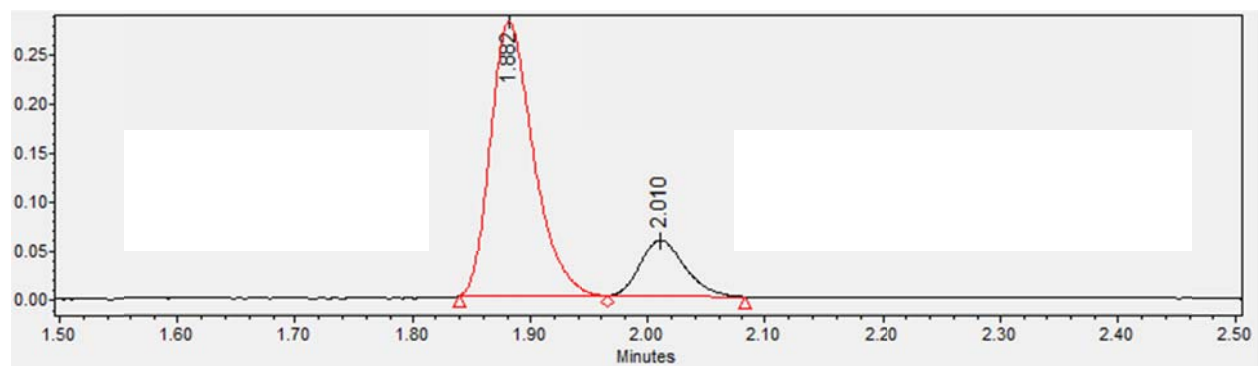

|   | RT    | Area    | % Area | Height |
|---|-------|---------|--------|--------|
| 1 | 1.882 | 1131929 | 81.81  | 446676 |
| 2 | 2.010 | 251701  | 18.19  | 93443  |

**1-benzyl-2-(((tert-butyldimethylsilyl)oxy)methyl)piperidine 2e**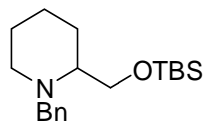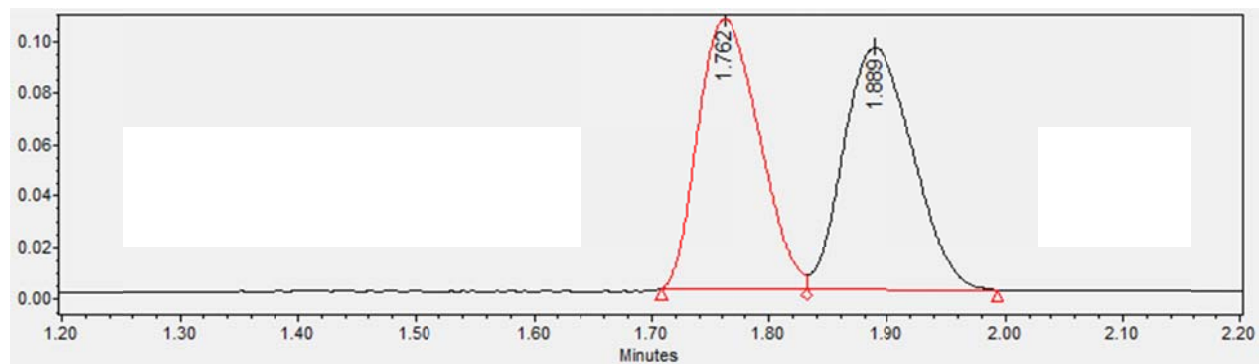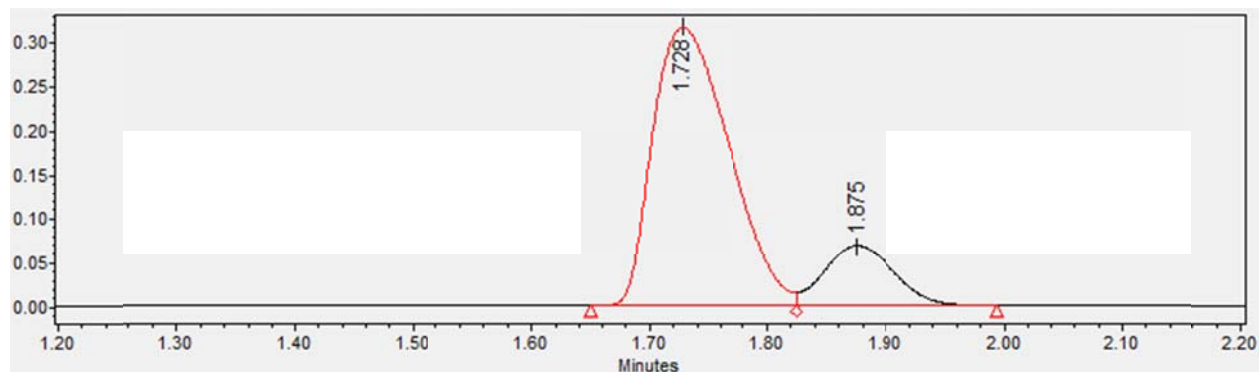

|   | RT    | Area    | % Area | Height |
|---|-------|---------|--------|--------|
| 1 | 1.728 | 1279697 | 83.78  | 285672 |
| 2 | 1.875 | 247716  | 16.22  | 61464  |

**1-benzyl-2-(2-bromophenethyl)piperidine 2f**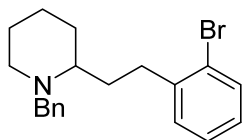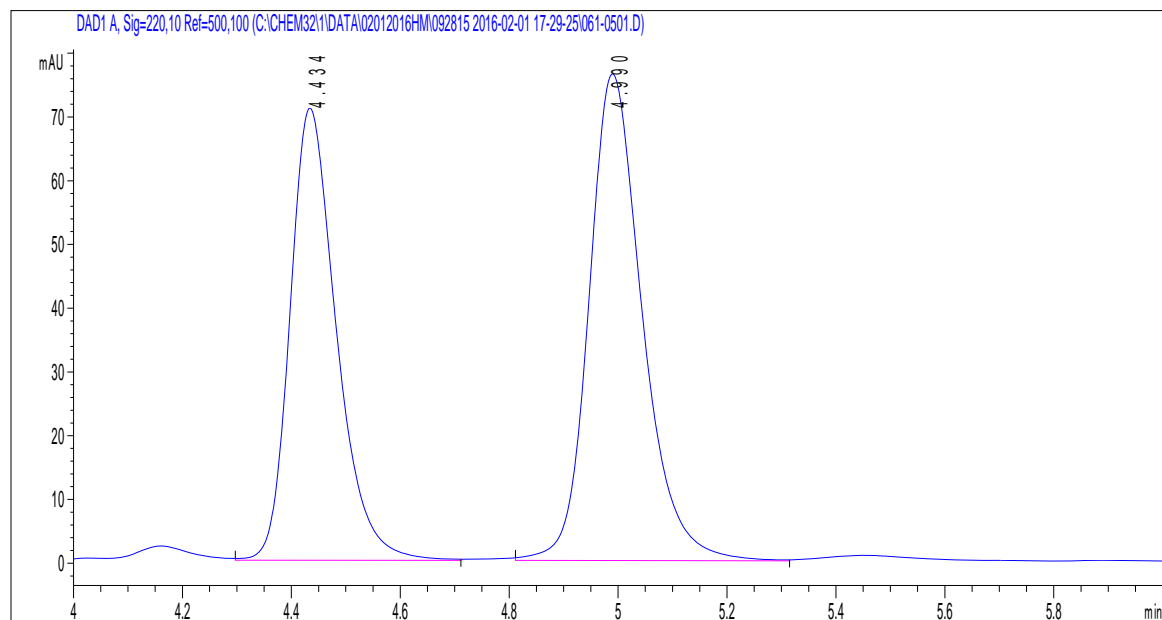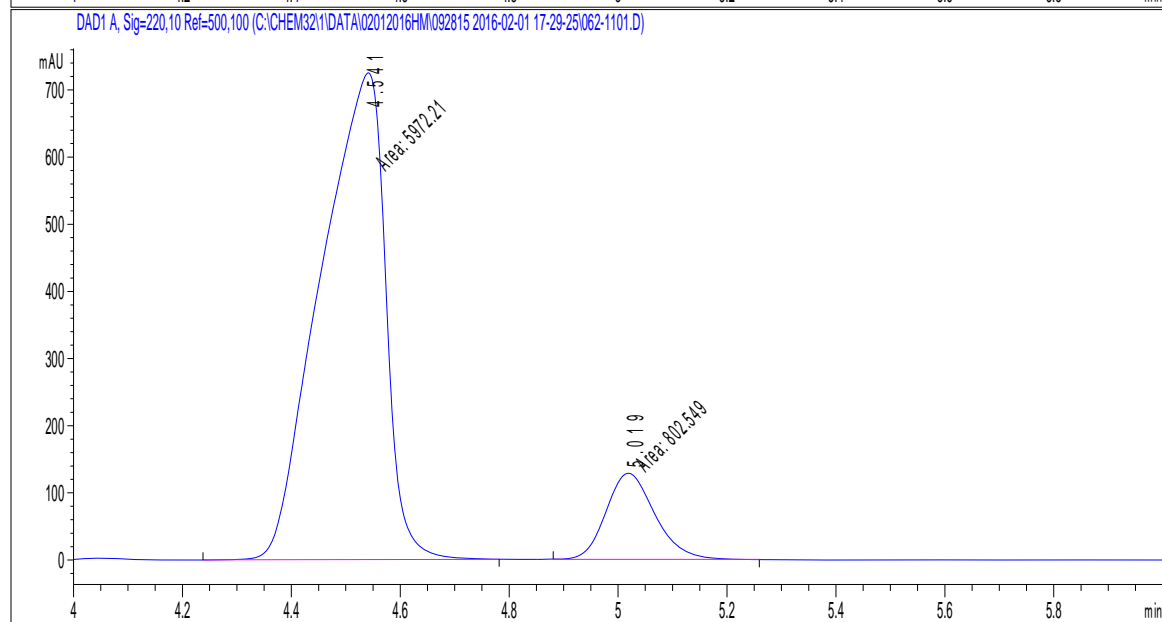

| # | Time  | Area   | Height | Width  | Area%  | Symmetry |
|---|-------|--------|--------|--------|--------|----------|
| 1 | 4.541 | 5972.2 | 725.1  | 0.1373 | 88.154 | 2.537    |
| 2 | 5.019 | 802.5  | 128.5  | 0.1041 | 11.846 | 0.809    |

**2-(2-(1,3-dioxan-2-yl)ethyl)-1-benzylpiperidine 2g**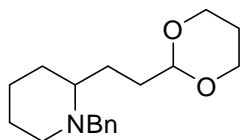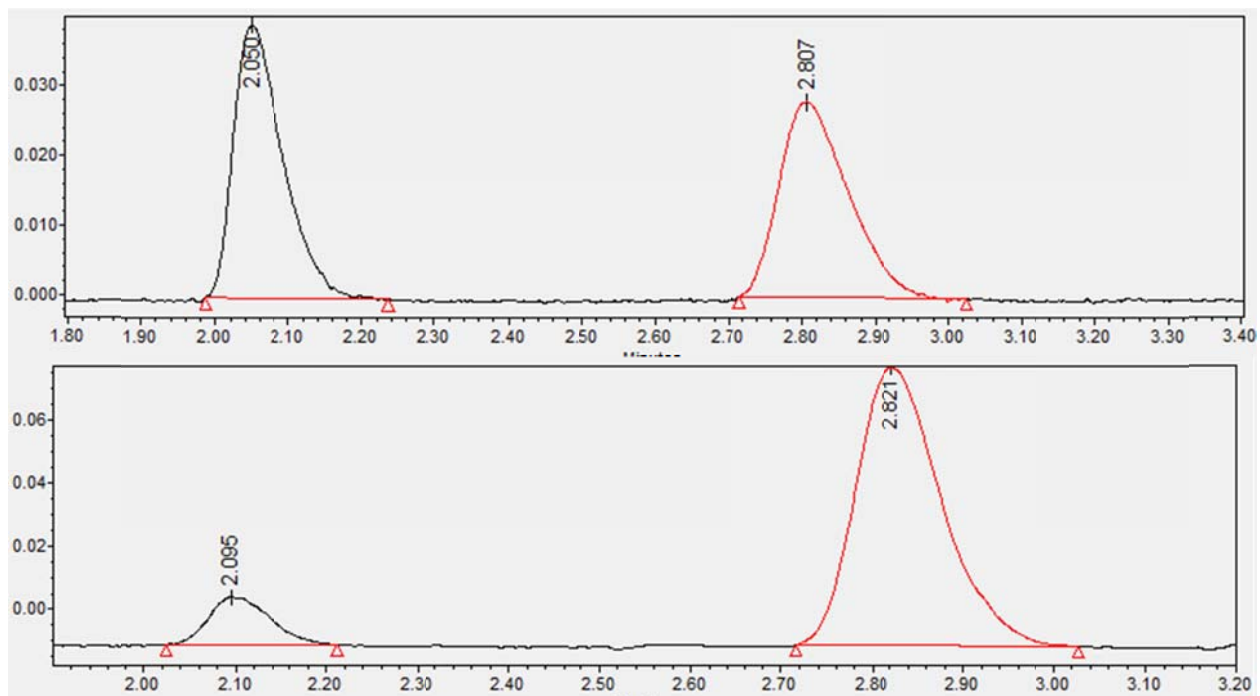

|   | RT    | Area   | % Area | Height |
|---|-------|--------|--------|--------|
| 1 | 2.095 | 37038  | 10.97  | 8036   |
| 2 | 2.820 | 300723 | 89.03  | 45840  |

**1-benzyl-2-((2-methyl-1,3-dioxolan-2-yl)methyl)piperidine 2h**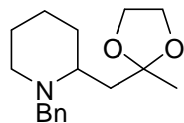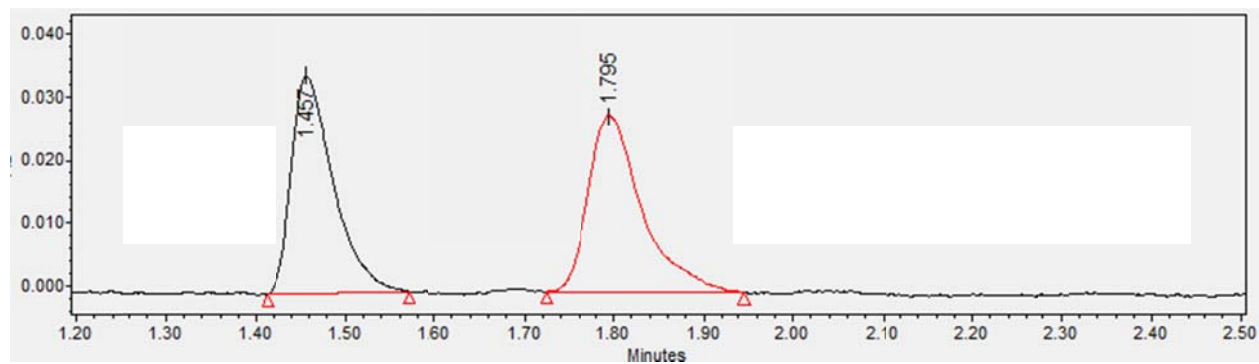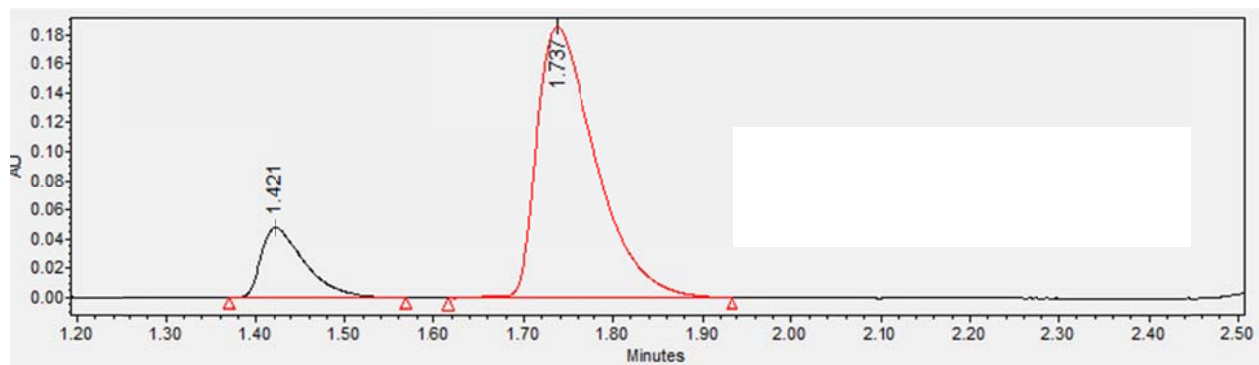

|   | RT    | Area   | % Area | Height |
|---|-------|--------|--------|--------|
| 1 | 1.421 | 158705 | 16.49  | 46903  |
| 2 | 1.737 | 803567 | 83.51  | 176377 |

**1-benzyl-2-methylpiperidine 2i**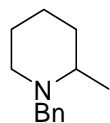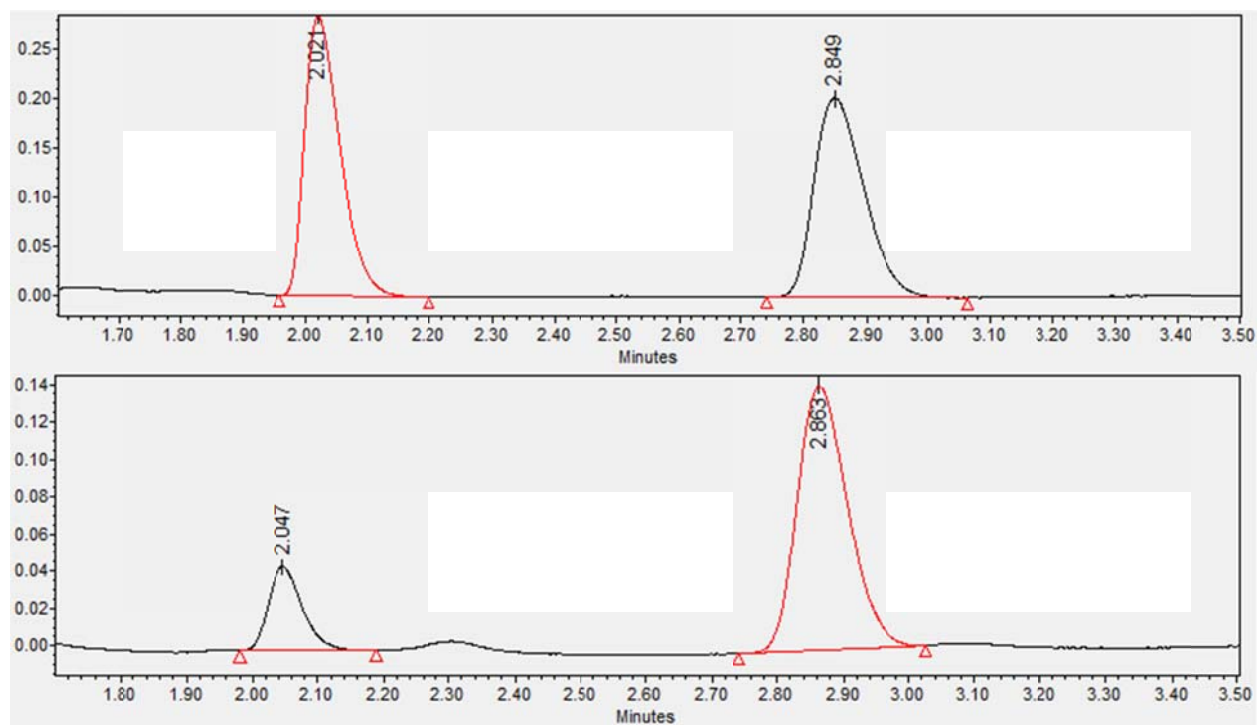

|   | RT    | Area   | % Area | Height |
|---|-------|--------|--------|--------|
| 1 | 2.047 | 164346 | 18.00  | 45248  |
| 2 | 2.863 | 748934 | 82.00  | 141360 |

**1-benzyl-2-propylpiperidine 2j**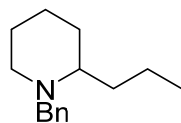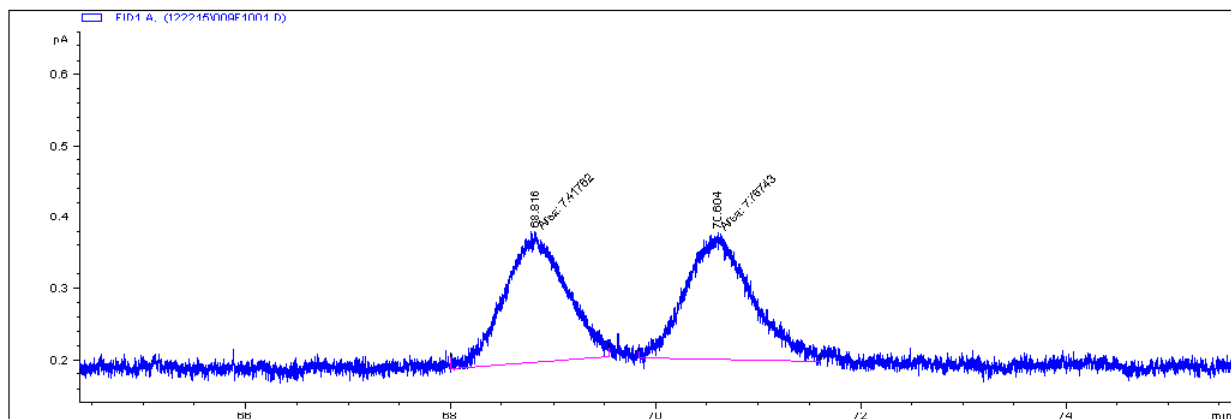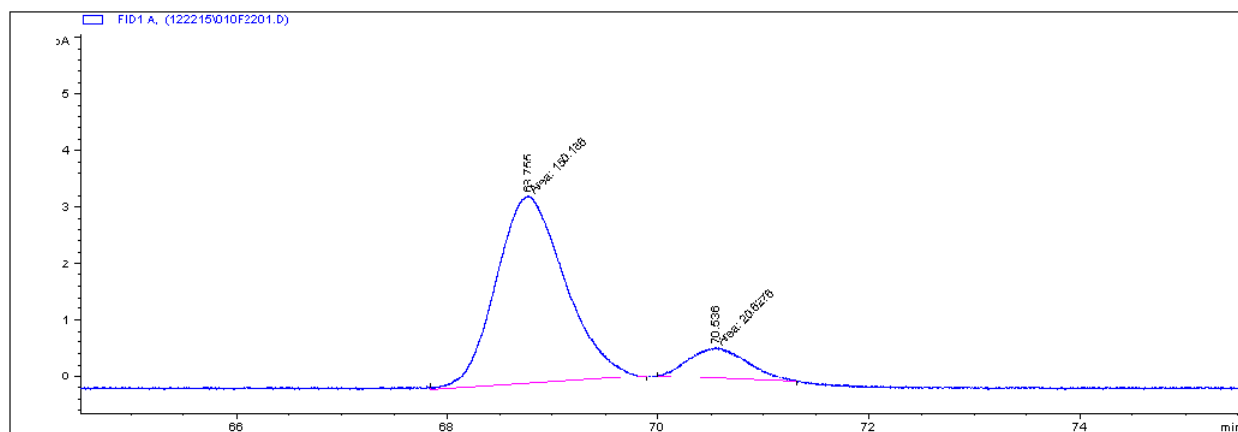

| # | Time   | Area  | Height | Width  | Area%  | Symmetry |
|---|--------|-------|--------|--------|--------|----------|
| 1 | 68.755 | 150.2 | 3.3    | 0.7559 | 87.924 | 0.812    |
| 2 | 70.536 | 20.6  | 5.4E-1 | 0.6411 | 12.076 | 0.756    |



**1-benzyl-2-isopropylpiperidine 2k**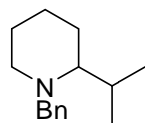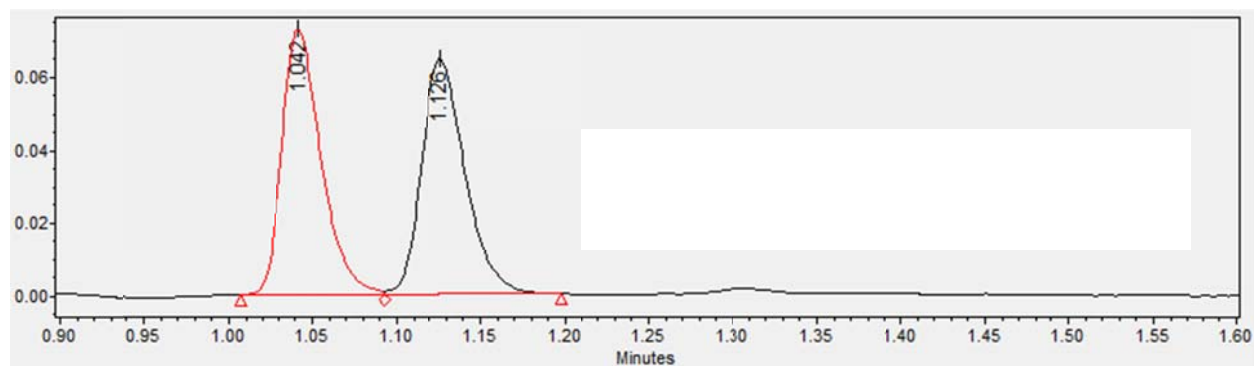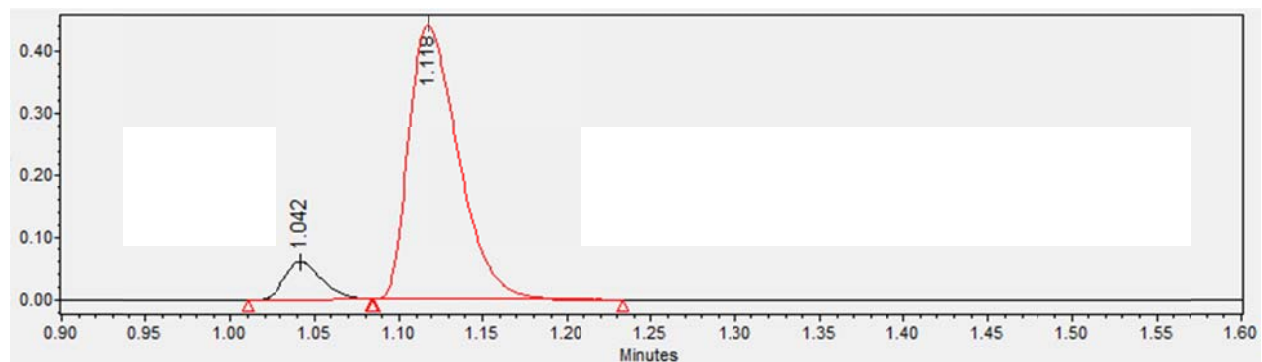

|   | RT    | Area   | % Area | Height |
|---|-------|--------|--------|--------|
| 1 | 1.041 | 98324  | 9.38   | 63828  |
| 2 | 1.117 | 949888 | 90.62  | 457318 |

**1-benzyl-2-cyclopropylpiperidine 2l**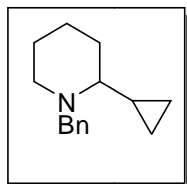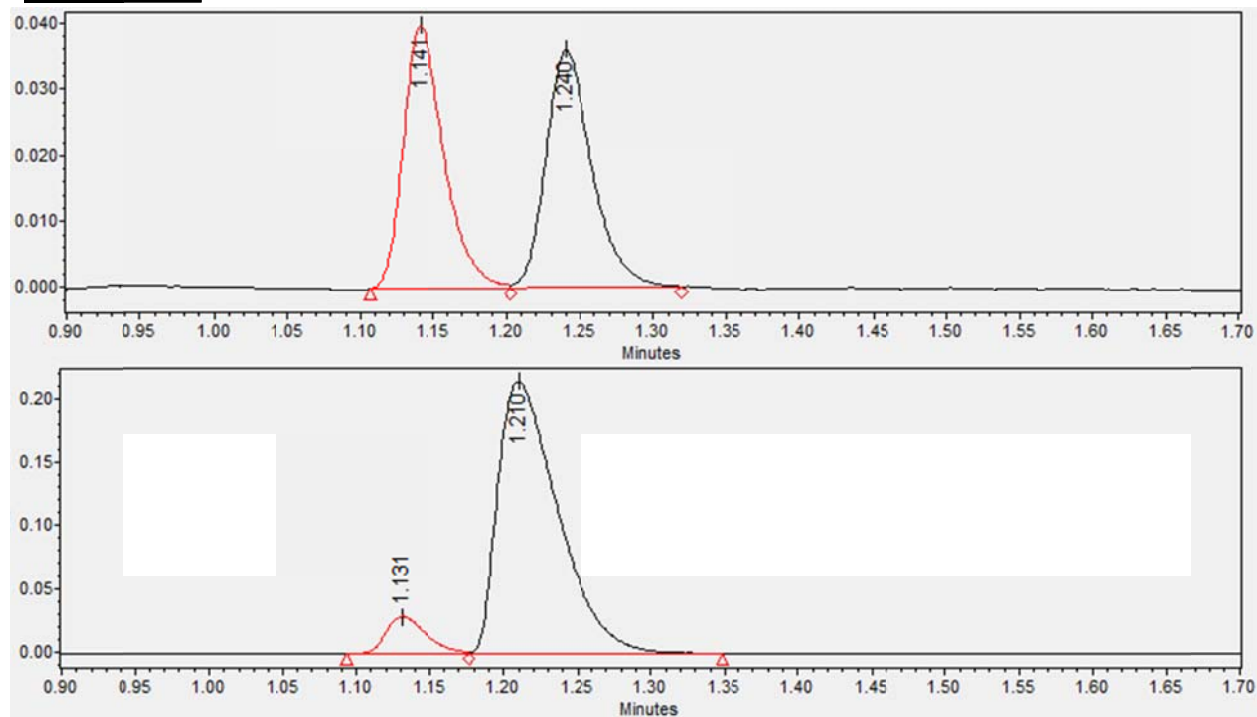

|   | RT    | Area   | % Area | Height |
|---|-------|--------|--------|--------|
| 1 | 1.131 | 54888  | 8.38   | 29111  |
| 2 | 1.210 | 600165 | 91.62  | 213055 |

***cis*-1-Benzyl-octahydro-1H-cyclopenta[b]pyridine 2m**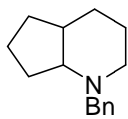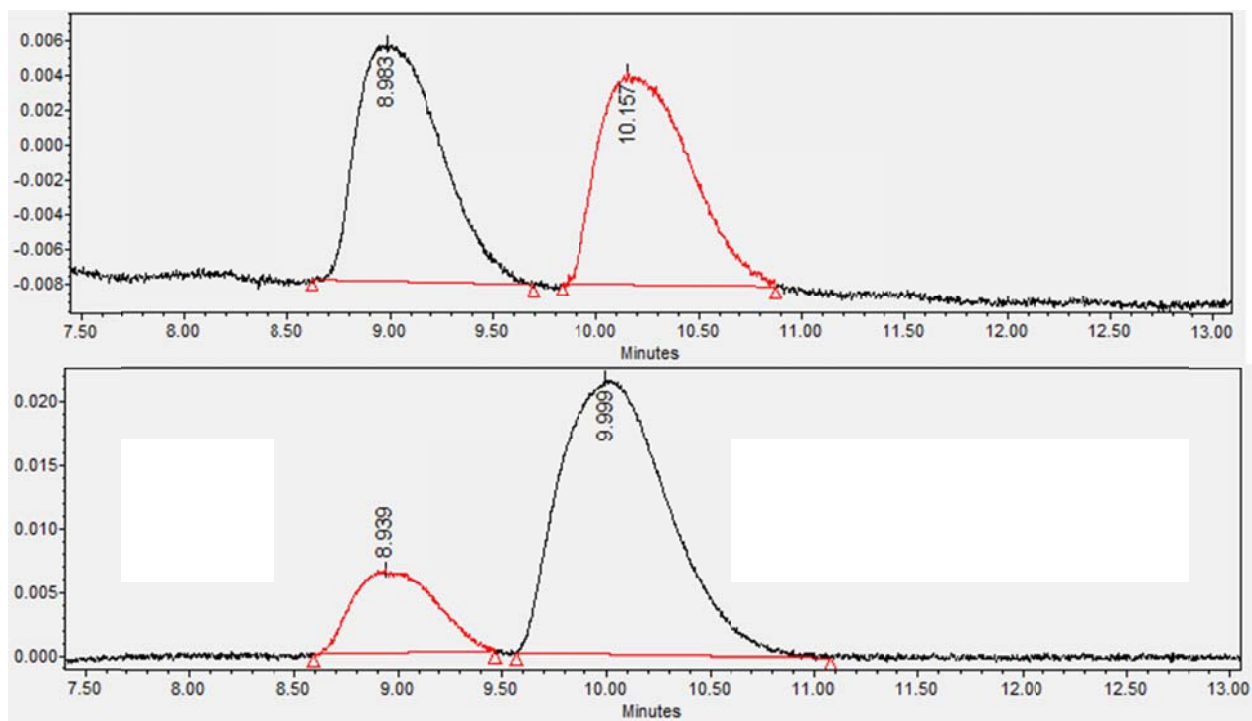

|   | RT    | Area   | % Area | Height |
|---|-------|--------|--------|--------|
| 1 | 8.938 | 217332 | 18.93  | 7854   |
| 2 | 9.997 | 930935 | 81.07  | 25612  |

***cis*-1-Benzyl-2,3-dimethylpiperidine 2n**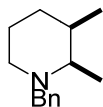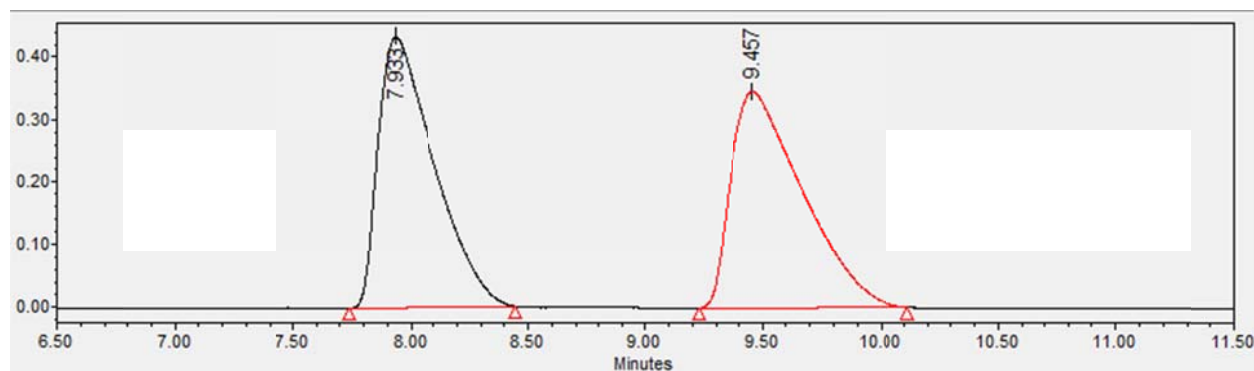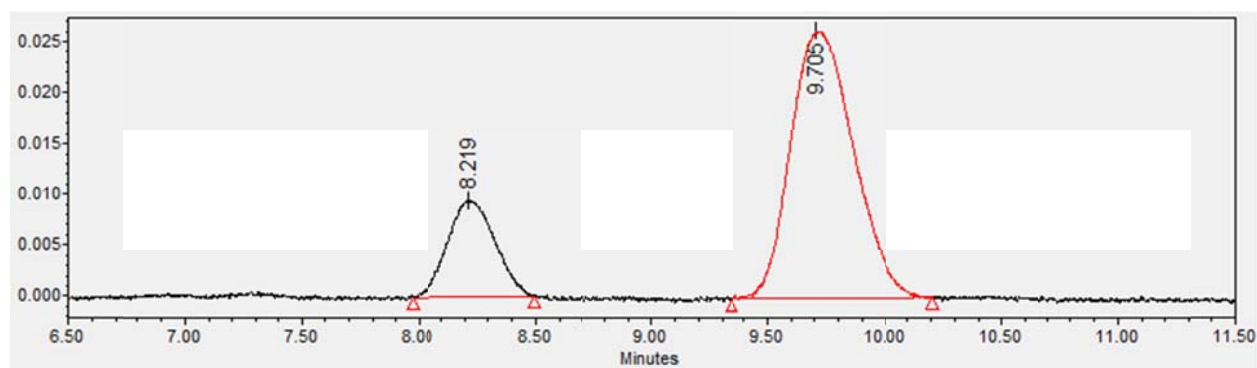

|   | RT    | Area   | % Area | Height |
|---|-------|--------|--------|--------|
| 1 | 8.219 | 133999 | 21.58  | 9575   |
| 2 | 9.705 | 486919 | 78.42  | 26235  |

**(R)-3-bromo-4-(piperidinylmethyl)benzonitrile hydrochloride 4-HCl**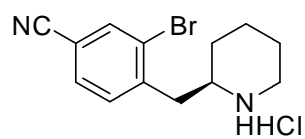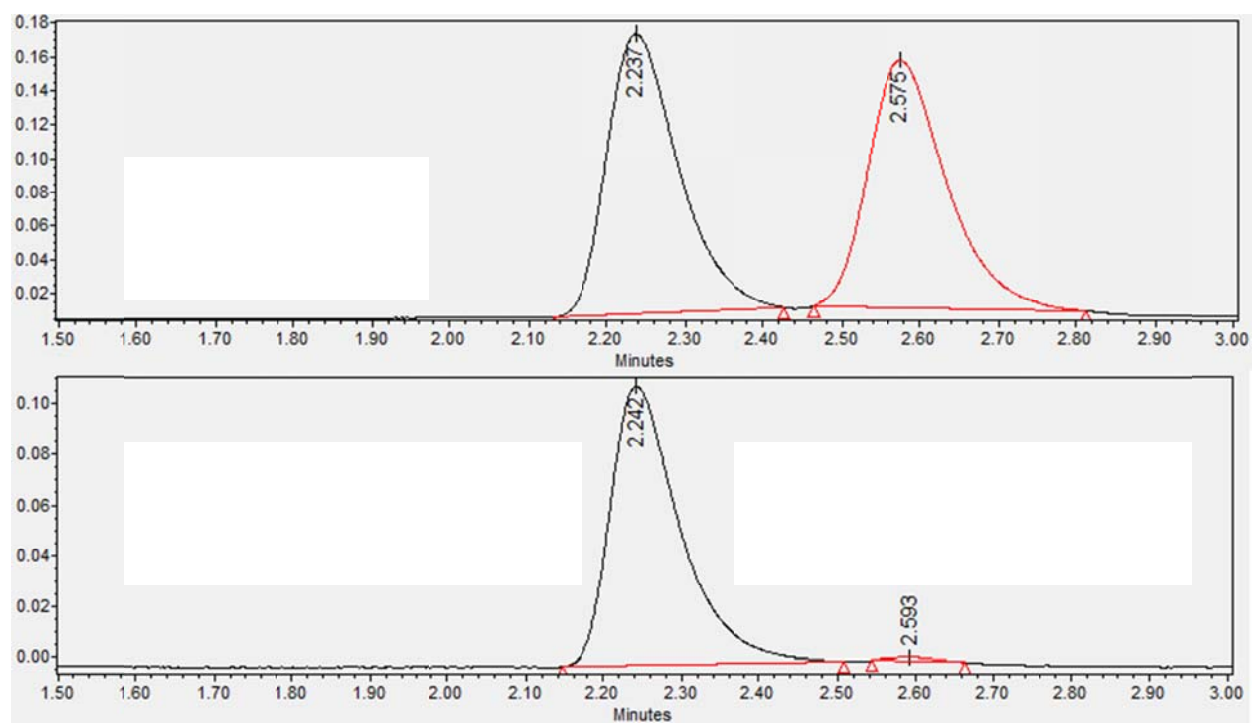

|   | RT    | Area   | % Area | Height |
|---|-------|--------|--------|--------|
| 1 | 2.242 | 684729 | 99.08  | 110378 |
| 2 | 2.593 | 6385   | 0.92   | 1663   |

**(R)-6,7,8,9,9a,10-hexahydropyridoindole-3-carbonitrile 5**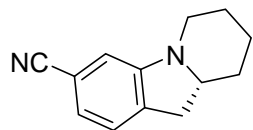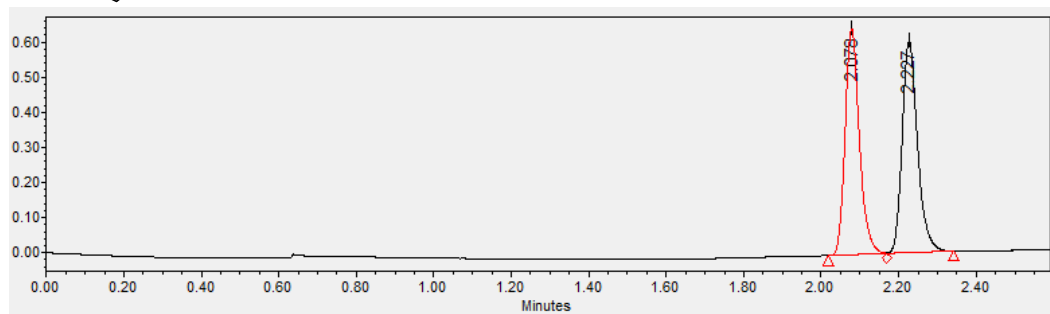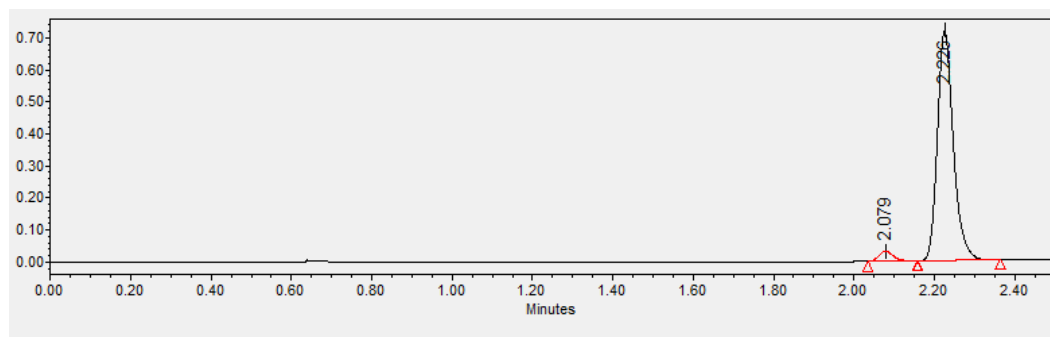

|   | RT    | Area    | % Area | Height |
|---|-------|---------|--------|--------|
| 1 | 2.075 | 15655   | 0.76   | 12245  |
| 2 | 2.226 | 2035043 | 99.24  | 748037 |

**(R)-6,6a,7,8,9,10-hexahydro-12H-benzo[f]pyrido[2,1-c][1,4]oxazepine 6**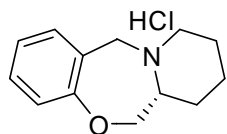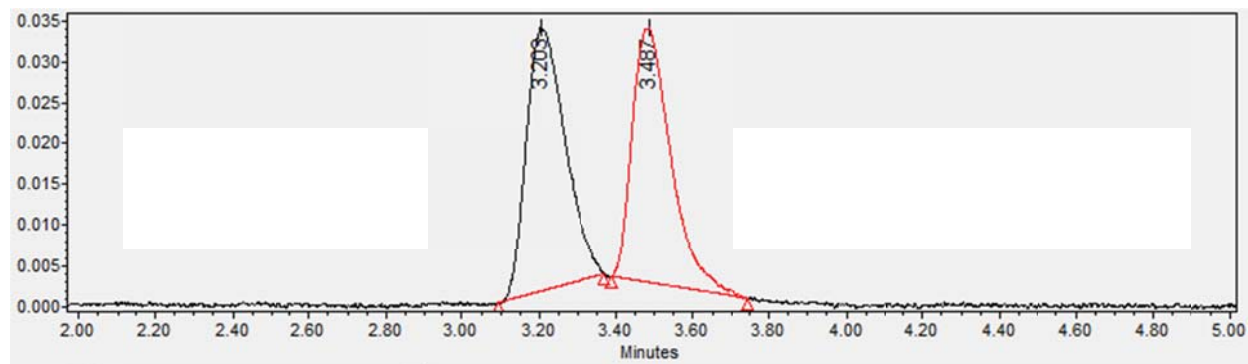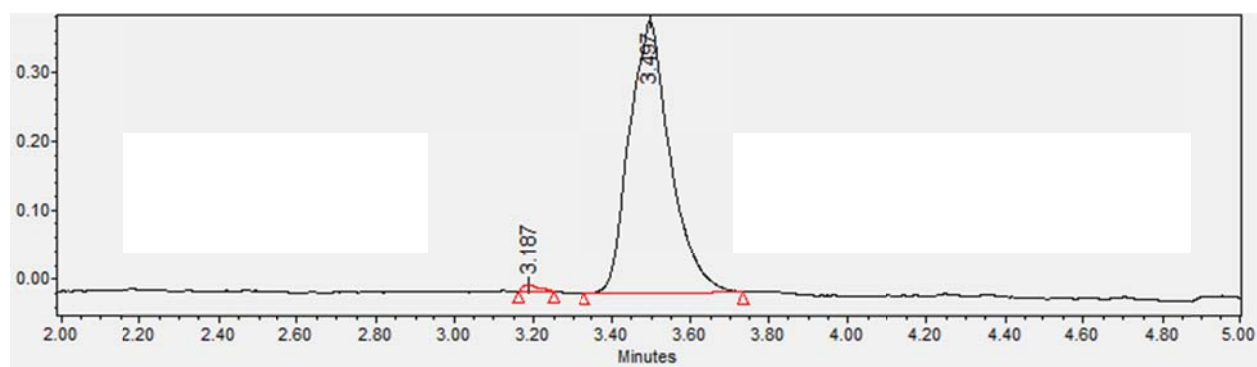

|   | RT    | Area    | % Area | Height |
|---|-------|---------|--------|--------|
| 1 | 3.187 | 27486   | 0.96   | 9523   |
| 2 | 3.497 | 2822155 | 99.04  | 393504 |

**2,3,4,4a,5,6-hexahydro-1H-pyrido[1,2-a]quinolone 7**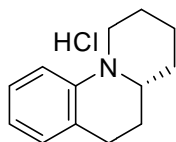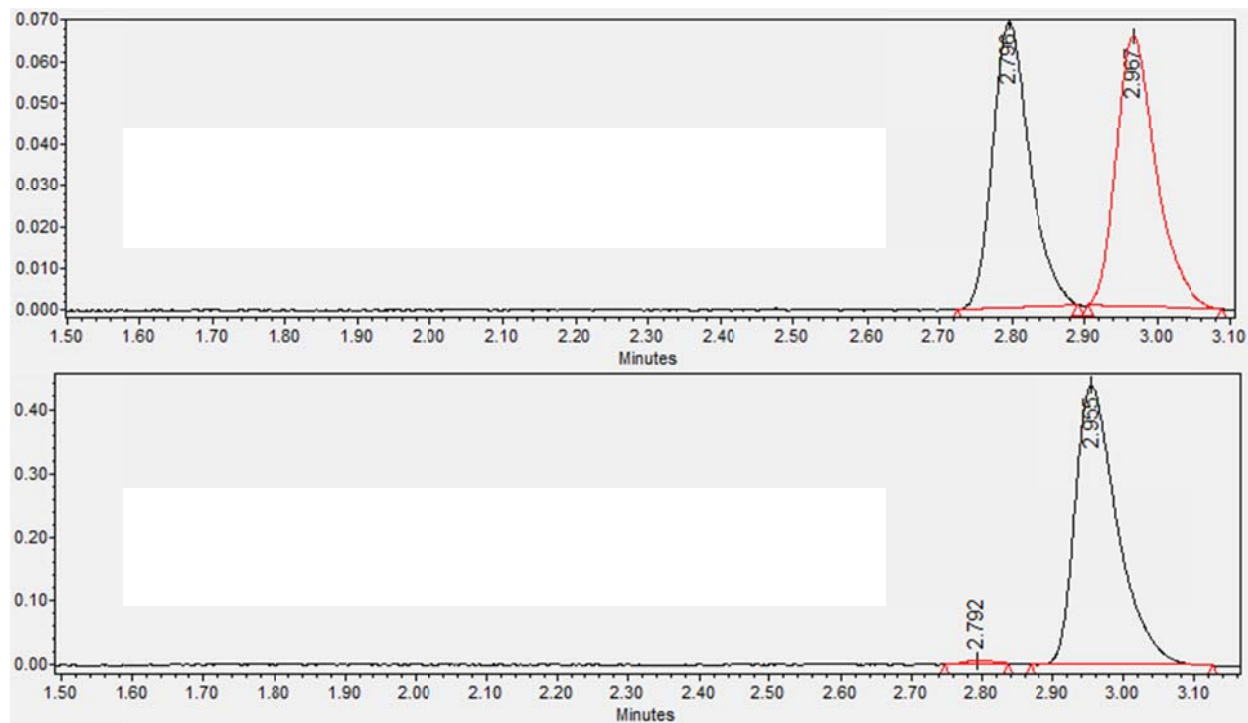

|   | RT    | Area    | % Area | Height |
|---|-------|---------|--------|--------|
| 1 | 2.792 | 15165   | 0.84   | 5658   |
| 2 | 2.955 | 1781639 | 99.16  | 436675 |



DSC plot of o-(2,4-dinitrophenyl)hydroxylamine (solid); Lot # 07821408E, Oakwood: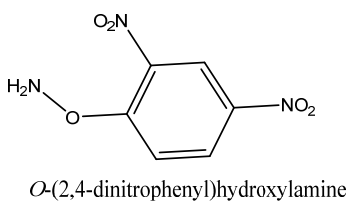<sup>exo</sup>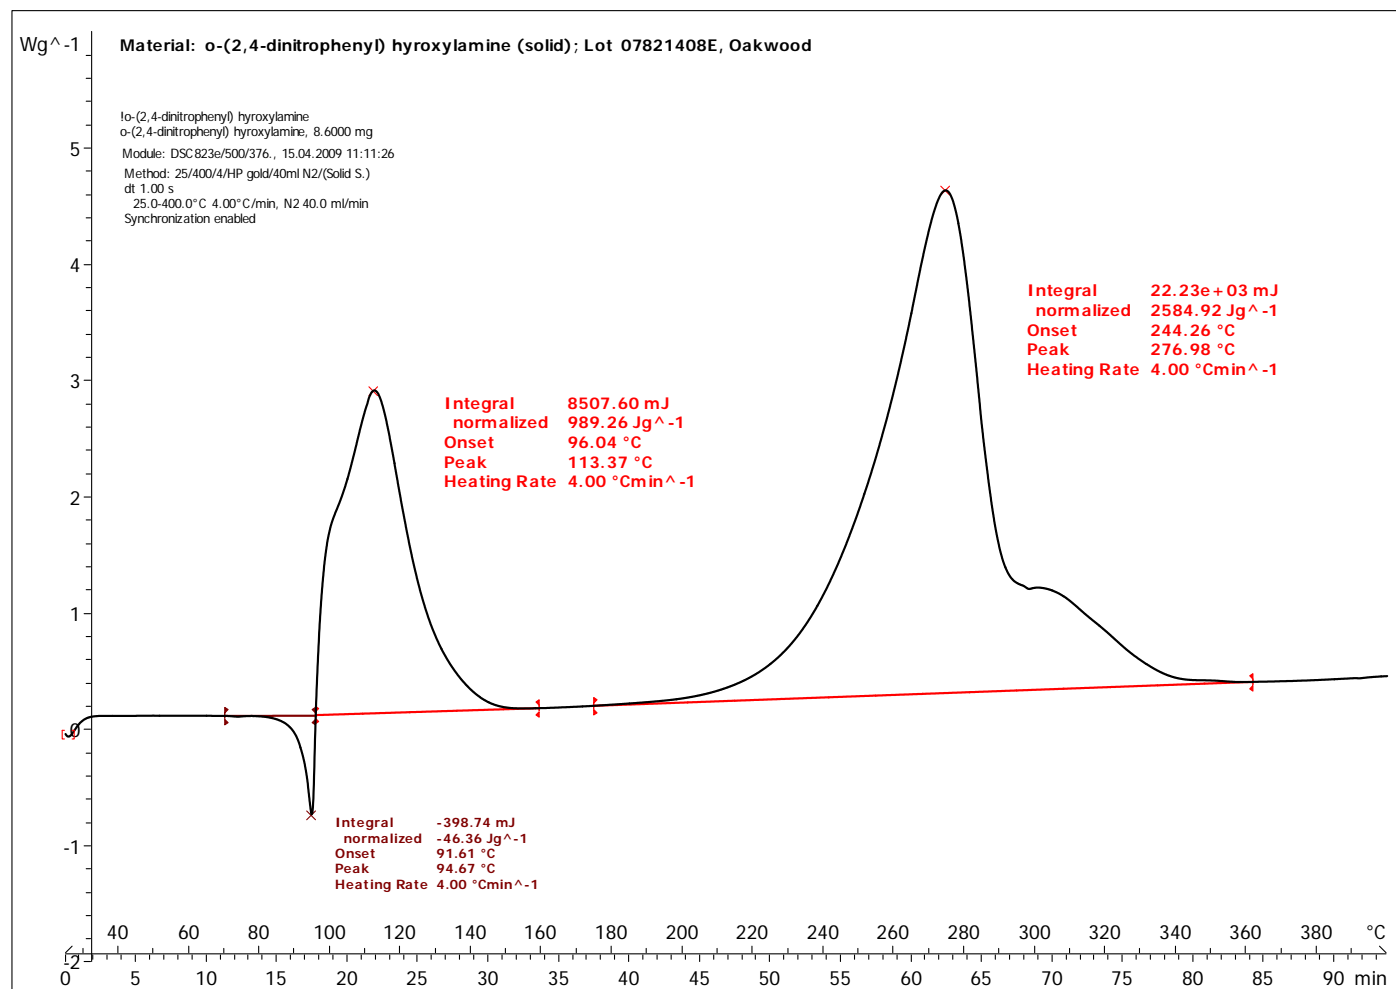

Lab: METTLER

STAR<sup>®</sup> SW 9.20

Method: 25 °C to 400 °C with 4 °C/min heating rate, in a closed gold plated crucible.

Module: Mettler Toledo DSC 823e; sensor FRS5+.

Sample preparation: As received.

## DSC plot of N-Boc-hydroxylamine (solid); Lot # F16T036,Alfa:

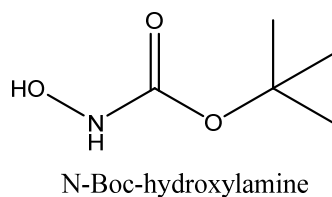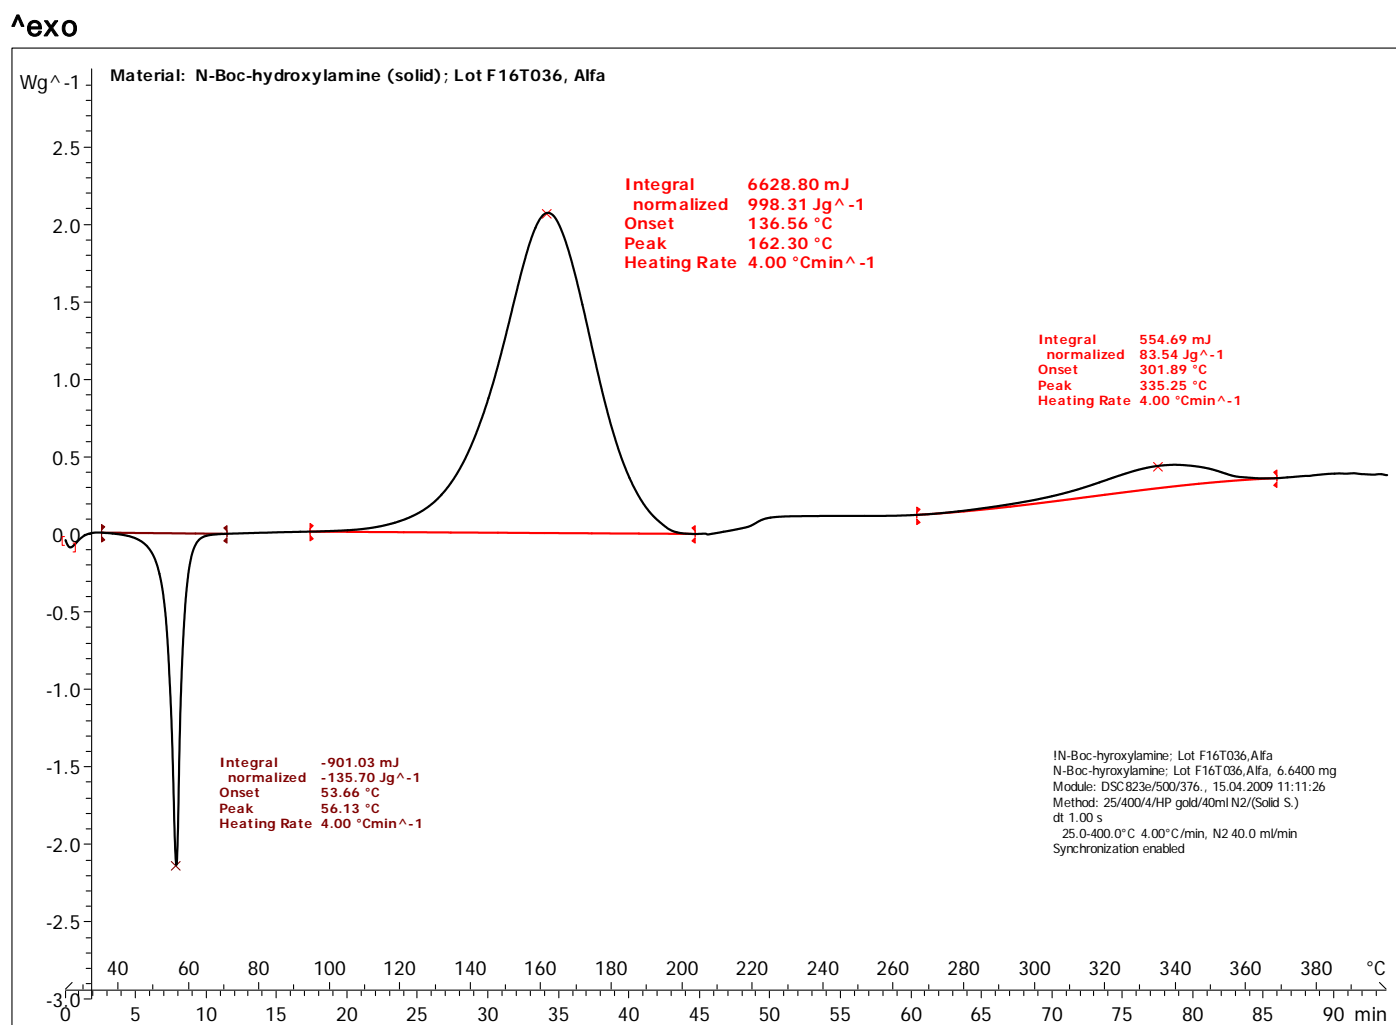

Lab: METTLER

STAR<sup>®</sup> SW 9.20

Method: 25 °C to 400 °C with 4 °C/min heating rate, in a closed gold plated crucible.

Module: Mettler Toledo DSC 823e; sensor FRS5+.

Sample preparation: As received.

## Transition State Calculations

All optimizations and transition state searches were performed with the Gaussian 09 program<sup>1</sup> on a Unix HPC platform. All structures were optimized at the B3LYP level of theory employing the LANL2DZ basis set with ECP for Ir<sup>3</sup> and D95v for the remaining atoms.<sup>4</sup> All optimized structures were subjected to a frequency test to verify a single imaginary frequency was found (Transition states) and that the imaginary vibrational mode corresponds with the expected reaction pathway. All stable structures were subjected to a frequency test to verify no imaginary frequencies. The resulting transition state structures were subjected to an IRC calculation (B3LYP/LANL2DZ) to verify a clean reaction pathway from the starting material to the respected product. An outer-sphere dissociated mechanism<sup>5</sup> similar to the DFT computed Ir-hydrogenation mechanism of imines<sup>6</sup> was used as the basis for the computational studies of the asymmetric Ir-hydrogenation of the enamine intermediate (Figure 1). An iodo-Ir complex<sup>7</sup> was found to be a viable catalyst for the sequential protonation and hydride delivery pathway for the enamine hydrogenation with a maximum energy barrier of 22.1 kcal/mol.

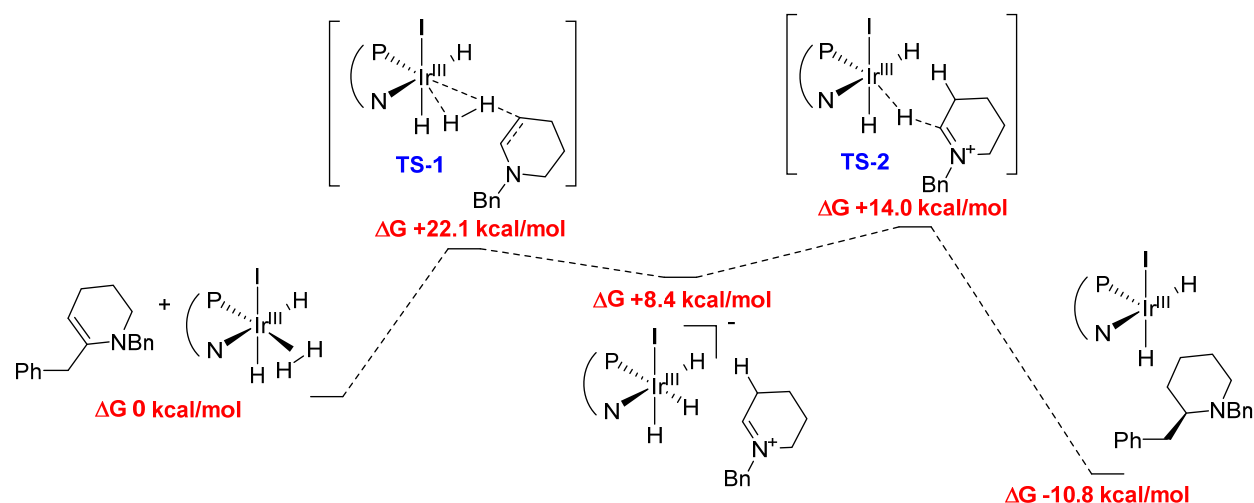

**Figure 1.** Reaction pathways for the Ir-L4 catalyzed asymmetric reduction (B3LYP/LANL2DZ CPCM = THF, 298.15 K, 1 atm).

**A**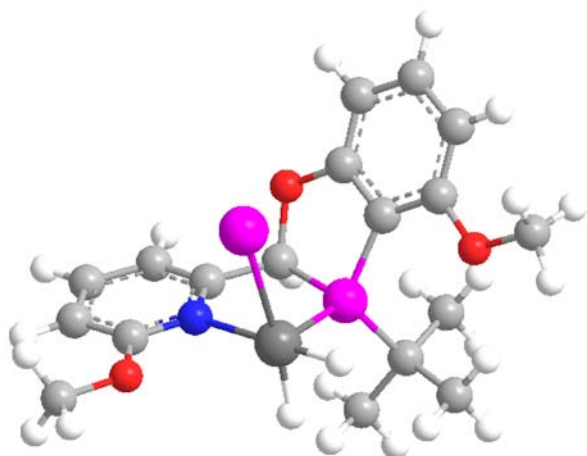

SCF Done: E(RB3LYP) = -1103.29465932

Temperature 298.150 Kelvin. Pressure 1.00000 Atm.

Zero-point correction= 0.390330 (Hartree/Particle)  
 Thermal correction to Energy= 0.417522  
 Thermal correction to Enthalpy= 0.418466  
 Thermal correction to Gibbs Free Energy= 0.331744  
 Sum of electronic and zero-point Energies= -1102.904329  
 Sum of electronic and thermal Energies= -1102.877137  
 Sum of electronic and thermal Enthalpies= -1102.876193  
 Sum of electronic and thermal Free Energies= -1102.962915

| Atomic Type | Coordinates (Angstroms) |                 |                |
|-------------|-------------------------|-----------------|----------------|
|             | X                       | Y               | Z              |
| C           | -9.629203015655         | 9.426970111035  | 3.102639345095 |
| C           | -8.770168061647         | 10.014148900830 | 2.149654171053 |
| C           | -8.600882831592         | 9.403449140794  | 0.891399715684 |
| C           | -9.283545327242         | 8.208096669312  | 0.609788796267 |
| C           | -10.145124078856        | 7.599779742616  | 1.534899797214 |
| C           | -10.302640408459        | 8.229732073697  | 2.781608329951 |
| H           | -9.777520295106         | 9.880580972412  | 4.075739439105 |
| H           | -10.657919821812        | 6.676734560158  | 1.288412215372 |
| H           | -10.960839335405        | 7.782945605492  | 3.521937410465 |
| O           | -8.052423901974         | 11.185946212940 | 2.353063404586 |
| C           | -8.134359430811         | 11.857056474342 | 3.655563852264 |
| H           | -7.782011629814         | 11.195165581296 | 4.455008045560 |
| H           | -7.476097031944         | 12.722733859319 | 3.571359399468 |

---

|    |                  |                 |                 |
|----|------------------|-----------------|-----------------|
| H  | -9.160424629072  | 12.185198322957 | 3.859895482595  |
| O  | -9.065202220030  | 7.613156580860  | -0.643728331748 |
| C  | -8.208923162929  | 8.425944256709  | -1.548466880761 |
| P  | -7.483607982180  | 9.879794162226  | -0.501197855788 |
| C  | -8.071001092458  | 11.537361425196 | -1.330576069172 |
| C  | -7.398213749867  | 12.718354464537 | -0.590830064431 |
| H  | -7.720374656950  | 13.655233516470 | -1.064982673609 |
| H  | -7.681642333184  | 12.745859849367 | 0.465994982042  |
| H  | -6.306244714605  | 12.657346575225 | -0.656715074323 |
| C  | -9.611684179224  | 11.632040682383 | -1.226469706912 |
| H  | -9.938524492267  | 12.547303741828 | -1.737572335657 |
| H  | -10.119040319822 | 10.786285248306 | -1.707764348423 |
| H  | -9.945707693246  | 11.688089779622 | -0.184852393940 |
| C  | -7.620722760455  | 11.515513303928 | -2.812392168162 |
| H  | -6.536105477124  | 11.388843610878 | -2.903494466086 |
| H  | -8.115738828903  | 10.726625367210 | -3.392105946793 |
| H  | -7.889528369091  | 12.476652406809 | -3.269392299843 |
| C  | -7.130488510452  | 7.548514669984  | -2.148185917569 |
| C  | -7.478755566534  | 6.534179622134  | -3.050719781256 |
| C  | -6.463082159401  | 5.726670553955  | -3.596296810912 |
| H  | -8.518836518991  | 6.380953487791  | -3.314415311594 |
| C  | -4.848134461248  | 7.016005687719  | -2.350770101698 |
| C  | -5.126952827379  | 5.967162282365  | -3.250511499449 |
| H  | -6.707733987289  | 4.927870213836  | -4.289153352272 |
| N  | -5.825995104449  | 7.775517182594  | -1.791129841859 |
| Ir | -5.294848017088  | 9.327146352755  | -0.339587266642 |
| O  | -3.587139969153  | 7.389710786875  | -1.956329707971 |
| C  | -2.420950467355  | 6.618679178328  | -2.415855600942 |
| H  | -2.327739003241  | 6.676857544898  | -3.506001966879 |
| H  | -2.496817290608  | 5.575602031911  | -2.089431704271 |
| H  | -1.565253385657  | 7.098421113106  | -1.941085500882 |
| H  | -5.067902094983  | 10.420149917351 | -1.473145150543 |
| I  | -5.095471417734  | 7.378223218293  | 1.788051819586  |
| H  | -4.936171784350  | 10.484610536786 | 0.709833853108  |
| H  | -4.330045068633  | 5.367047901972  | -3.671233776206 |
| H  | -8.871236573729  | 8.803558248591  | -2.333484732821 |

---

**Iodide**

SCF Done: E(RB3LYP) = -11.5603193090 A.U.

Temperature 298.150 Kelvin. Pressure 1.00000 Atm.

|                                              |                             |
|----------------------------------------------|-----------------------------|
| Zero-point correction=                       | 0.000000 (Hartree/Particle) |
| Thermal correction to Energy=                | 0.001416                    |
| Thermal correction to Enthalpy=              | 0.002360                    |
| Thermal correction to Gibbs Free Energy=     | -0.016848                   |
| Sum of electronic and zero-point Energies=   | -11.560319                  |
| Sum of electronic and thermal Energies=      | -11.558903                  |
| Sum of electronic and thermal Enthalpies=    | -11.557959                  |
| Sum of electronic and thermal Free Energies= | -11.577168                  |

| Atomic<br>Type | Coordinates (Angstroms) |                |                |
|----------------|-------------------------|----------------|----------------|
|                | X                       | Y              | Z              |
| I              | 0.381558050000          | 1.359300460000 | 0.000000000000 |

**Hydrogen**

SCF Done: E(RB3LYP) = -1.17449948 A.U.

Temperature 298.150 Kelvin. Pressure 1.00000 Atm.

Zero-point correction= 0.010144 (Hartree/Particle)  
Thermal correction to Energy= 0.012504  
Thermal correction to Enthalpy= 0.013449  
Thermal correction to Gibbs Free Energy= -0.001346  
Sum of electronic and zero-point Energies= -1.164356  
Sum of electronic and thermal Energies= -1.161995  
Sum of electronic and thermal Enthalpies= -1.161051  
Sum of electronic and thermal Free Energies= -1.175845

| Atomic<br>Type | Coordinates (Angstroms) |                |                 |
|----------------|-------------------------|----------------|-----------------|
|                | X                       | Y              | Z               |
| H              | 0.000000000000          | 0.000000000000 | 0.371854993324  |
| H              | 0.000000000000          | 0.000000000000 | -0.371854993324 |

**B**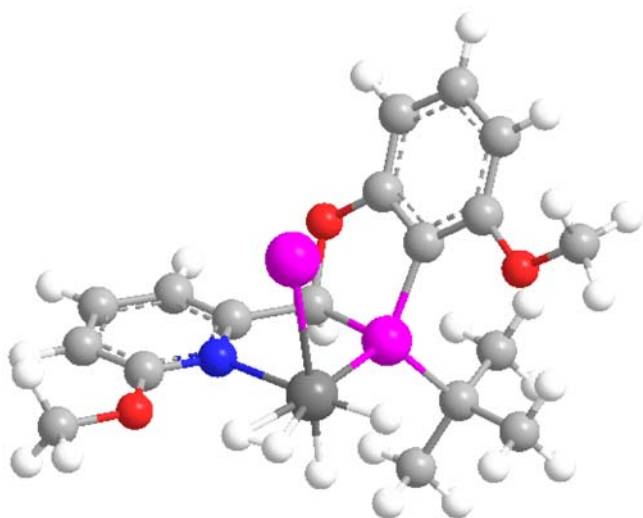

SCF Done: E(RB3LYP) = -1104.48278058 A.U.

Temperature 298.150 Kelvin. Pressure 1.00000 Atm.

Zero-point correction= 0.406320 (Hartree/Particle)  
 Thermal correction to Energy= 0.434508  
 Thermal correction to Enthalpy= 0.435452  
 Thermal correction to Gibbs Free Energy= 0.345711  
 Sum of electronic and zero-point Energies= -1104.076461  
 Sum of electronic and thermal Energies= -1104.048273  
 Sum of electronic and thermal Enthalpies= -1104.047328  
 Sum of electronic and thermal Free Energies= -1104.137070

| Atomic Type | Coordinates (Angstroms) |                 |                 |
|-------------|-------------------------|-----------------|-----------------|
|             | X                       | Y               | Z               |
| C           | 3.960099544396          | -1.372795389568 | 1.366443938687  |
| C           | 3.204116183566          | -0.696142969907 | 0.384874580152  |
| C           | 2.185127534306          | 0.192564256616  | 0.778053924929  |
| C           | 1.929714903089          | 0.381605130402  | 2.145302602188  |
| C           | 2.663666772868          | -0.272773276580 | 3.146180760983  |
| C           | 3.679861049293          | -1.150979220486 | 2.730691211412  |
| H           | 4.749924640762          | -2.060264739113 | 1.086832693822  |
| H           | 2.441648324622          | -0.105079958340 | 4.194239381209  |
| H           | 4.265484685932          | -1.676917172138 | 3.479998645238  |
| O           | 3.392921867982          | -0.833302671254 | -0.984811012055 |
| C           | 4.390131535430          | -1.791501447014 | -1.474606061699 |



---

|    |                 |                 |                 |
|----|-----------------|-----------------|-----------------|
| H  | 4.151135198288  | -2.806588883645 | -1.136925523299 |
| H  | 4.327435802149  | -1.736863307987 | -2.562263876607 |
| H  | 5.396608003983  | -1.509566603446 | -1.142855352374 |
| O  | 0.894686272424  | 1.265249980661  | 2.494850483768  |
| C  | 0.184231302206  | 1.843505788517  | 1.322691760941  |
| P  | 1.008184538440  | 1.160155734285  | -0.271055371463 |
| C  | 1.968458015423  | 2.652388181532  | -1.071190080427 |
| C  | 2.640512456659  | 2.148342374998  | -2.372182352934 |
| H  | 3.173183615702  | 2.987586792433  | -2.839492357943 |
| H  | 3.359667186241  | 1.347741176738  | -2.170846403202 |
| H  | 1.897652394504  | 1.773895722467  | -3.085774913318 |
| C  | 3.034321815800  | 3.170458902614  | -0.076992340171 |
| H  | 3.555675694304  | 4.020774974880  | -0.536228286190 |
| H  | 2.594529530806  | 3.524351169488  | 0.864214215371  |
| H  | 3.779837319489  | 2.402995779024  | 0.157097010725  |
| C  | 0.947822492747  | 3.768874787115  | -1.402576387560 |
| H  | 0.169988277427  | 3.415692896558  | -2.088210144006 |
| H  | 0.462371009693  | 4.177012329910  | -0.507053844053 |
| H  | 1.483198839699  | 4.593854718233  | -1.890696002202 |
| C  | -1.294787619765 | 1.516593380455  | 1.424604259374  |
| C  | -1.982989553579 | 1.934495626344  | 2.573053460424  |
| C  | -3.353688807785 | 1.652371877817  | 2.693165439668  |
| H  | -1.448604830126 | 2.464794592627  | 3.352293852842  |
| C  | -3.255804580710 | 0.589905217102  | 0.525825159005  |
| C  | -4.004493735159 | 0.975034763426  | 1.656427457103  |
| H  | -3.907148037861 | 1.960512503012  | 3.574365187828  |
| N  | -1.919480620477 | 0.838989661534  | 0.406217463777  |
| Ir | -0.774623717011 | 0.137005187293  | -1.376946558976 |
| O  | -3.808240770499 | -0.063621517984 | -0.548429389393 |
| C  | -5.230097313229 | -0.443940538554 | -0.527931010342 |
| H  | -5.865949717802 | 0.446433602841  | -0.475743507410 |
| H  | -5.434721394506 | -1.117383330103 | 0.311145940367  |
| H  | -5.390140909080 | -0.963542115482 | -1.472661079594 |
| H  | -1.000041888949 | 1.513026786814  | -2.144575925110 |
| I  | -0.499131451161 | -2.510298258535 | -0.172083574505 |
| H  | 0.179696896725  | -0.288918348613 | -2.584819504609 |
| H  | -5.062061859659 | 0.754461652328  | 1.720810139833  |
| H  | 0.326011095478  | 2.925901053613  | 1.394787405606  |
| H  | -2.377317125965 | -0.417732586043 | -1.938693929179 |
| H  | -1.841836787110 | -0.612114596881 | -2.564479796633 |

---

C

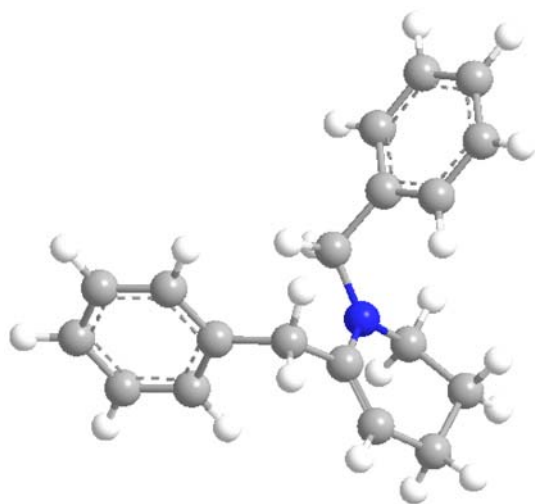

SCF Done: E(RB3LYP) = -791.285602263 A.U.

Temperature 298.150 Kelvin. Pressure 1.00000 Atm.

Zero-point correction= 0.355723 (Hartree/Particle)  
 Thermal correction to Energy= 0.372917  
 Thermal correction to Enthalpy= 0.373861  
 Thermal correction to Gibbs Free Energy= 0.306314  
 Sum of electronic and zero-point Energies= -790.929879  
 Sum of electronic and thermal Energies= -790.912685  
 Sum of electronic and thermal Enthalpies= -790.911741  
 Sum of electronic and thermal Free Energies= -790.979288

| Atomic Type | Coordinates (Angstroms) |                |                 |
|-------------|-------------------------|----------------|-----------------|
|             | X                       | Y              | Z               |
| C           | 2.753915001655          | 1.055387060371 | -1.257736535987 |
| C           | 3.415986812919          | 0.445292975767 | -0.027606718558 |
| H           | 4.499782843563          | 0.507166272470 | -0.190222149172 |
| H           | 3.212055415549          | 1.053269312217 | 0.865236885096  |
| N           | 1.372604756334          | 1.314271727263 | -1.217090254446 |
| C           | 0.513076914367          | 1.109661193422 | -0.048944876996 |
| H           | 1.048899938221          | 0.520759708205 | 0.700876751894  |
| H           | -0.358898674351         | 0.501595519617 | -0.336716110410 |
| C           | 0.697447419618          | 1.730607213693 | -2.463456098362 |
| H           | -0.233704634862         | 2.243916564435 | -2.196117078805 |
| H           | 0.425300567064          | 0.842066659297 | -3.060003703211 |
| C           | 1.588242169627          | 2.662446421120 | -3.308869478886 |
| H           | 1.765558420841          | 3.591022684197 | -2.749598562155 |

---

|   |                 |                 |                 |
|---|-----------------|-----------------|-----------------|
| H | 1.061600181811  | 2.927467448743  | -4.235083714472 |
| C | 2.937042178310  | 1.975445737386  | -3.621200918757 |
| H | 3.648613759293  | 2.715136902087  | -4.017232484102 |
| H | 2.795622652743  | 1.232304819465  | -4.423546679072 |
| C | 3.503036696487  | 1.324836711510  | -2.371653275339 |
| H | 4.561957492974  | 1.080256997542  | -2.349753228259 |
| C | -0.920424354732 | 4.742568014825  | 1.914775861227  |
| H | -1.275443991317 | 5.640586671376  | 2.414696009426  |
| C | 0.333584491816  | 4.736050111290  | 1.270475264666  |
| H | 0.949594202542  | 5.632546755530  | 1.273435542281  |
| C | 0.791394158280  | 3.573318188664  | 0.620378716966  |
| H | 1.754431311543  | 3.575089668047  | 0.116072032610  |
| C | 0.005609915489  | 2.400504292332  | 0.606120041364  |
| C | -1.252701894919 | 2.417254604637  | 1.247236178651  |
| H | -1.874510062268 | 1.523195083311  | 1.234298724333  |
| C | -1.713779742311 | 3.577475272805  | 1.900051235298  |
| H | -2.685883384401 | 3.574975880528  | 2.387865521673  |
| C | 2.492730824814  | -3.739553029824 | 0.850282595577  |
| H | 2.276831207823  | -4.782108452508 | 1.071366692729  |
| C | 2.583699998163  | -3.299450305273 | -0.486111112115 |
| H | 2.438281476913  | -4.005350795400 | -1.300868341540 |
| C | 2.863183295131  | -1.949059717238 | -0.771667628051 |
| H | 2.932418276150  | -1.614117402469 | -1.804218954132 |
| C | 3.054411369984  | -1.014564593736 | 0.270518035875  |
| C | 2.958462285308  | -1.464765473615 | 1.606793487575  |
| H | 3.100471956704  | -0.757894289141 | 2.422860536016  |
| C | 2.681818344697  | -2.815442670656 | 1.897322298246  |
| H | 2.611680402426  | -3.143169742293 | 2.932035491325  |

## D

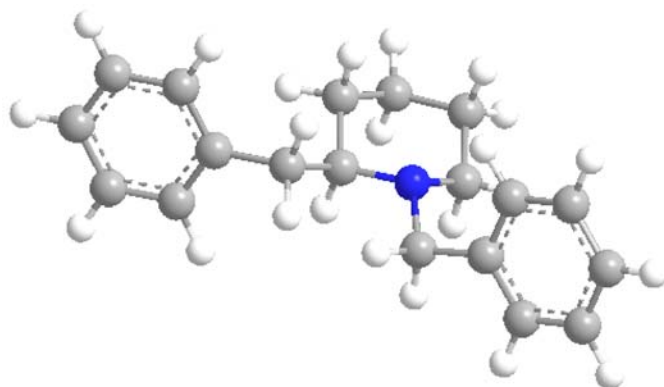

SCF Done: E(RB3LYP) = -792.501898325 A.U.

Temperature 298.150 Kelvin. Pressure 1.00000 Atm.

Zero-point correction= 0.379402 (Hartree/Particle)  
 Thermal correction to Energy= 0.396701  
 Thermal correction to Enthalpy= 0.397645  
 Thermal correction to Gibbs Free Energy= 0.331303  
 Sum of electronic and zero-point Energies= -792.122496  
 Sum of electronic and thermal Energies= -792.105197  
 Sum of electronic and thermal Enthalpies= -792.104253  
 Sum of electronic and thermal Free Energies= -792.170596

| Atomic Type | Coordinates (Angstroms) |                 |                 |
|-------------|-------------------------|-----------------|-----------------|
|             | X                       | Y               | Z               |
| C           | 2.454994395600          | 1.304067115475  | -0.257300185271 |
| H           | 2.834318259205          | 1.891806157156  | 0.607924716783  |
| C           | 2.543530026001          | -0.208180591097 | 0.111767735649  |
| H           | 1.911468154305          | -0.415530910268 | 0.982936451125  |
| H           | 2.138797736021          | -0.787323245704 | -0.728732758621 |
| N           | 1.046702480820          | 1.719990311109  | -0.565857317145 |
| C           | 0.073097412666          | 1.462878839682  | 0.528325968248  |
| H           | 0.232547277546          | 2.154335082702  | 1.380707410049  |
| H           | 0.234928053525          | 0.451519040316  | 0.912561027500  |
| C           | 0.969280224722          | 3.152081919968  | -0.975272389600 |
| H           | 1.290635327130          | 3.807718549682  | -0.136758575154 |
| H           | -0.079978330506         | 3.387297929429  | -1.184744848974 |
| C           | 1.830867933781          | 3.458903414858  | -2.208750315506 |
| H           | 1.747850583257          | 4.527676318954  | -2.451124497855 |
| H           | 1.447879048763          | 2.892551374376  | -3.070054597352 |

---

|   |                 |                 |                 |
|---|-----------------|-----------------|-----------------|
| C | 3.294606617311  | 3.067209699412  | -1.936981686563 |
| H | 3.708869589792  | 3.720286873999  | -1.152683273352 |
| H | 3.912283438739  | 3.210967518100  | -2.834180566887 |
| C | 3.362532020172  | 1.598630443793  | -1.477040191220 |
| H | 3.049940810710  | 0.942912451081  | -2.304352274819 |
| H | 4.394713478072  | 1.331170206817  | -1.221692527714 |
| C | -4.114843777290 | 1.618290295471  | -0.690456262139 |
| H | -5.161256027595 | 1.642196383496  | -0.985472500915 |
| C | -3.155627087148 | 1.000553710806  | -1.520782041466 |
| H | -3.464168096546 | 0.545616807415  | -2.459542951957 |
| C | -1.801619153343 | 0.969248239009  | -1.138571550702 |
| H | -1.058365132849 | 0.503097060598  | -1.780147814737 |
| C | -1.381713637942 | 1.556070222734  | 0.076789552453  |
| C | -2.346595033224 | 2.176408656492  | 0.898879362764  |
| H | -2.037279279526 | 2.638767133150  | 1.834708702599  |
| C | -3.704949977644 | 2.207058169665  | 0.521858977715  |
| H | -4.435290646207 | 2.690315732718  | 1.166845031210  |
| C | 6.587695825978  | -1.536780394315 | 1.089221571456  |
| H | 7.593441594135  | -1.867956825783 | 1.336624940722  |
| C | 5.889455349629  | -0.672762435147 | 1.958205156123  |
| H | 6.356637889152  | -0.337387606261 | 2.881465861655  |
| C | 4.586164109707  | -0.248165760400 | 1.637433135382  |
| H | 4.052883547550  | 0.409360085219  | 2.321850529432  |
| C | 3.955096414242  | -0.671829148135 | 0.443325605799  |
| C | 4.664084162407  | -1.540123280665 | -0.416730218439 |
| H | 4.194143137146  | -1.881046402811 | -1.337115662967 |
| C | 5.968289243537  | -1.971015101686 | -0.099454426306 |
| H | 6.495952038201  | -2.640884041408 | -0.774632301002 |

## E

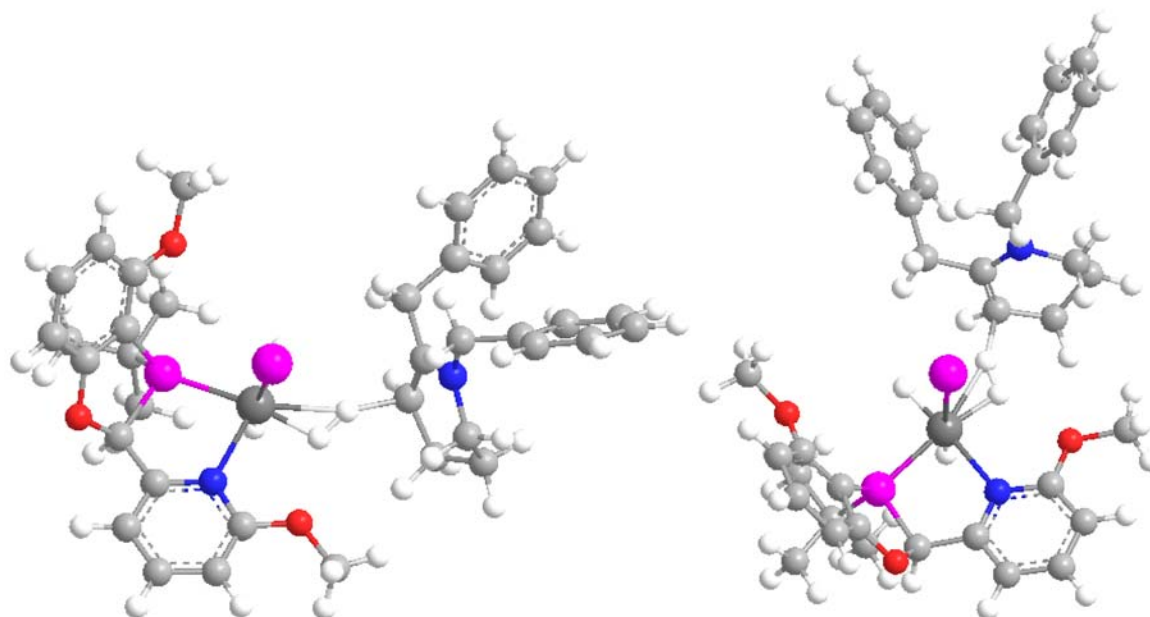

SCF Done: E(RB3LYP) = -1895.75554256 A.U.

Temperature 298.150 Kelvin. Pressure 1.00000 Atm.

Zero-point correction= 0.761805 (Hartree/Particle)  
 Thermal correction to Energy= 0.808456  
 Thermal correction to Enthalpy= 0.809400  
 Thermal correction to Gibbs Free Energy= 0.674340  
 Sum of electronic and zero-point Energies= -1894.993737  
 Sum of electronic and thermal Energies= -1894.947086  
 Sum of electronic and thermal Enthalpies= -1894.946142  
 Sum of electronic and thermal Free Energies= -1895.081202

| Atomic Type | Coordinates (Angstroms) |                 |                 |
|-------------|-------------------------|-----------------|-----------------|
|             | X                       | Y               | Z               |
| C           | -5.825168734398         | 3.296223254400  | -0.284385588667 |
| C           | -4.601603040531         | 2.610376158238  | -0.422695246404 |
| C           | -4.118708727586         | 1.778557284405  | 0.610655349926  |
| C           | -4.886463096908         | 1.648618529891  | 1.790762905736  |
| C           | -6.108307413762         | 2.331998670869  | 1.932782576894  |
| C           | -6.584001526624         | 3.159064001202  | 0.894202429441  |
| H           | -6.182578489888         | 3.931551294427  | -1.091242410364 |
| H           | -4.021078554287         | 2.726856467406  | -1.336134167105 |
| H           | -6.686096245522         | 2.222005777750  | 2.847559080980  |
| C           | -2.096408952204         | -0.801501650273 | 2.012222819100  |

---

|   |                 |                 |                 |
|---|-----------------|-----------------|-----------------|
| C | -2.291430968356 | -2.191273658872 | 2.622872133806  |
| C | -2.776825610610 | -0.402963608554 | 0.848002807883  |
| C | -3.431835171165 | -2.948635281102 | 1.909533173022  |
| H | -1.358942592292 | -2.773978629875 | 2.560184771915  |
| C | -3.330059735224 | -2.753820136251 | 0.388043938168  |
| H | -4.405141496135 | -2.572287725804 | 2.251362878818  |
| H | -4.154131326359 | -3.261768840857 | -0.121423654274 |
| C | -2.765980063910 | 1.074198188024  | 0.472568868194  |
| H | -2.376038629612 | 1.210474298312  | -0.542601521392 |
| H | -2.040517534027 | 1.558360238384  | 1.135761463712  |
| H | -2.388020553558 | -3.181506855179 | 0.010583600163  |
| H | -3.392419434487 | -4.020623969582 | 2.138781323875  |
| H | -2.520770697191 | -2.093990146919 | 3.692034726600  |
| N | -3.386561221142 | -1.313816517816 | 0.028786506949  |
| C | -3.876219286356 | -1.022911473118 | -1.338036661615 |
| H | -3.220099745511 | -1.527424701518 | -2.061879188190 |
| H | -3.789135883359 | 0.048072515014  | -1.527418254212 |
| C | -5.320363004121 | -1.461342614718 | -1.575615862249 |
| C | -6.347130718947 | -1.110163356938 | -0.670678361709 |
| C | -5.652598928696 | -2.192344283870 | -2.735417032848 |
| C | -7.679732461506 | -1.484735417958 | -0.922439672751 |
| H | -6.102976351659 | -0.546879368362 | 0.226529768294  |
| C | -6.987568128151 | -2.564308525553 | -2.993415055344 |
| H | -4.869457595459 | -2.474456752680 | -3.436710023372 |
| C | -8.005770436352 | -2.211869764538 | -2.086488978576 |
| H | -8.461145386042 | -1.209579639748 | -0.217983367079 |
| H | -7.228865924455 | -3.128120810147 | -3.891293896482 |
| H | -9.035942528100 | -2.500145527639 | -2.281096504751 |
| H | -0.629270696553 | -0.870920991791 | 1.474000212101  |
| C | 3.723317483652  | 3.221334888291  | -2.965213131201 |
| C | 3.225962590279  | 2.852152565837  | -1.695832652722 |
| C | 3.804296035860  | 1.771439368787  | -1.002565927852 |
| C | 4.872453739277  | 1.078023510687  | -1.593108788335 |
| C | 5.394775276579  | 1.420256658085  | -2.850421170532 |
| C | 4.799471228868  | 2.501077896689  | -3.523732585509 |
| H | 3.291294369276  | 4.048740817969  | -3.516537047304 |
| H | 6.220796232628  | 0.861811086459  | -3.277052190745 |
| H | 5.175717998007  | 2.790704905120  | -4.501454877996 |
| O | 2.180624144460  | 3.502145355851  | -1.047228420596 |
| C | 1.485831799284  | 4.593650650234  | -1.736001941672 |
| H | 1.040864068717  | 4.241176337370  | -2.674031163069 |
| H | 0.700480916518  | 4.911248599583  | -1.048556414933 |
| H | 2.169287850913  | 5.428489347792  | -1.933302691075 |
| O | 5.430539357870  | 0.012210657090  | -0.867302906661 |

---

|    |                 |                 |                 |
|----|-----------------|-----------------|-----------------|
| C  | 4.694549158329  | -0.292611457937 | 0.388946700185  |
| P  | 3.329847714259  | 1.034163253112  | 0.637088950241  |
| C  | 4.030326211037  | 2.228151034576  | 2.012535647112  |
| C  | 2.974354789737  | 3.334628476530  | 2.258239095204  |
| H  | 3.348612301088  | 4.015454205585  | 3.035275428094  |
| H  | 2.779602746983  | 3.914709870273  | 1.350001652940  |
| H  | 2.025434720358  | 2.907672849026  | 2.603993831402  |
| C  | 5.366906338726  | 2.853402791547  | 1.548940695409  |
| H  | 5.757125834113  | 3.490064506090  | 2.354651839114  |
| H  | 6.129334727114  | 2.095228420180  | 1.328507641994  |
| H  | 5.236062651658  | 3.477255687858  | 0.657836271364  |
| C  | 4.240846456308  | 1.411041691802  | 3.310871271320  |
| H  | 3.317060323094  | 0.916313888037  | 3.629959412667  |
| H  | 5.024108872206  | 0.649075919542  | 3.206454062647  |
| H  | 4.555892571679  | 2.097502802481  | 4.108412832678  |
| C  | 4.154564183786  | -1.712179539913 | 0.321299158395  |
| C  | 5.059260483041  | -2.727246450260 | -0.027034124062 |
| C  | 4.615589327822  | -4.057633468449 | -0.070090609306 |
| H  | 6.084169708630  | -2.466673603927 | -0.262050458253 |
| C  | 2.429617193747  | -3.272950708436 | 0.609837484095  |
| C  | 3.286158619874  | -4.339135517745 | 0.259780606229  |
| H  | 5.292290206166  | -4.860806335343 | -0.344286787933 |
| N  | 2.837139902753  | -1.968365196537 | 0.621190741893  |
| Ir | 1.398978681032  | -0.262747263822 | 0.989650065966  |
| O  | 1.119213421550  | -3.472534155731 | 0.972190736018  |
| C  | 0.574202022803  | -4.837680896496 | 0.974316380812  |
| H  | 1.114787922753  | -5.473178816479 | 1.685226108689  |
| H  | 0.607372779344  | -5.271781900076 | -0.031350611345 |
| H  | -0.460996075338 | -4.722017141565 | 1.295062319423  |
| H  | 0.177933984122  | -1.376060999777 | 1.360213610041  |
| H  | 1.697719384507  | -0.223101371267 | 2.552527005320  |
| I  | 0.576034030347  | -0.434296128218 | -1.837478821191 |
| H  | 0.475833571176  | 1.016774243068  | 1.239664485979  |
| H  | 2.923345861485  | -5.358356964944 | 0.247555621789  |
| H  | 5.438181294656  | -0.228977505351 | 1.189025482161  |
| H  | -1.843151610295 | 0.003061124764  | 2.701074938591  |
| H  | -4.527428843862 | 1.013795948679  | 2.597838542212  |
| H  | -7.528436287931 | 3.686705724619  | 1.002550104116  |



**F**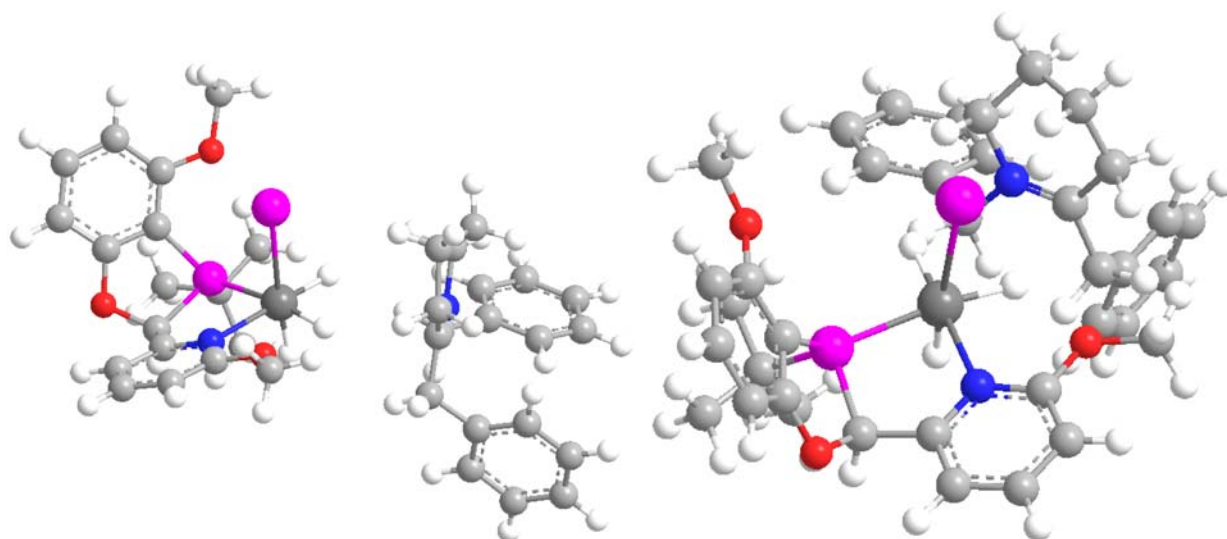

SCF Done: E(RB3LYP) = -1895.78227702 A.U.

Temperature 298.150 Kelvin. Pressure 1.00000 Atm.

Zero-point correction= 0.768183 (Hartree/Particle)  
 Thermal correction to Energy= 0.815262  
 Thermal correction to Enthalpy= 0.816206  
 Thermal correction to Gibbs Free Energy= 0.679274  
 Sum of electronic and zero-point Energies= -1895.014094  
 Sum of electronic and thermal Energies= -1894.967015  
 Sum of electronic and thermal Enthalpies= -1894.966071  
 Sum of electronic and thermal Free Energies= -1895.103003

Zero-point correction= 0.768183 (Hartree/Particle)  
 Thermal correction to Energy= 0.815262  
 Thermal correction to Enthalpy= 0.816206  
 Thermal correction to Gibbs Free Energy= 0.679274  
 Sum of electronic and zero-point Energies= -1895.014094  
 Sum of electronic and thermal Energies= -1894.967015  
 Sum of electronic and thermal Enthalpies= -1894.966071  
 Sum of electronic and thermal Free Energies= -1895.103003

| Atomic Type | Coordinates (Angstroms) |                 |                 |
|-------------|-------------------------|-----------------|-----------------|
|             | X                       | Y               | Z               |
| C           | 6.753778396002          | -0.765723531020 | -2.740843500448 |
| C           | 5.441150251834          | -0.939899782461 | -2.260374889787 |
| C           | 5.211363477241          | -1.364855065566 | -0.934229686098 |
| C           | 6.320864028880          | -1.619802848468 | -0.096545798548 |

---

|    |                 |                 |                 |
|----|-----------------|-----------------|-----------------|
| C  | 7.633012014991  | -1.443368821387 | -0.573791072135 |
| C  | 7.854398173569  | -1.014070221090 | -1.898136885109 |
| H  | 6.914076476066  | -0.438881031885 | -3.764955801989 |
| H  | 4.598470445618  | -0.752214742512 | -2.922936960973 |
| H  | 8.476885633251  | -1.644171140810 | 0.081351062617  |
| C  | 3.163493316268  | -1.862634306991 | 2.035127401599  |
| C  | 2.588651974537  | -1.223817666357 | 3.311032331234  |
| C  | 3.403675189541  | -0.931536046507 | 0.869450489129  |
| C  | 3.183248040814  | 0.179821462486  | 3.507601361907  |
| H  | 1.497158509585  | -1.151928873091 | 3.225799726632  |
| C  | 2.882400188364  | 1.037801256531  | 2.277219041005  |
| H  | 4.267786855864  | 0.122789569762  | 3.672363017401  |
| H  | 3.408014479262  | 1.993899679483  | 2.318089769273  |
| C  | 3.779949739378  | -1.609068741912 | -0.444470443759 |
| H  | 3.058955641505  | -1.317360176274 | -1.215474849341 |
| H  | 3.638004167751  | -2.684219246484 | -0.291754622117 |
| H  | 1.806750412380  | 1.233793454220  | 2.183146898353  |
| H  | 2.742753111647  | 0.670645905163  | 4.382587785627  |
| H  | 2.809139886572  | -1.866908286186 | 4.169833995664  |
| N  | 3.296302302198  | 0.370580612039  | 0.991290343515  |
| C  | 3.381880149376  | 1.327028821675  | -0.168842636478 |
| H  | 2.365131970321  | 1.713994000591  | -0.299106199767 |
| H  | 3.643533291540  | 0.764888293630  | -1.063057730722 |
| C  | 4.368620965001  | 2.465150021703  | 0.048662242583  |
| C  | 5.750815203597  | 2.213056743939  | 0.200350609165  |
| C  | 3.908380686492  | 3.798849996297  | 0.049466010643  |
| C  | 6.654238895817  | 3.279294185409  | 0.359505855983  |
| H  | 6.122838920059  | 1.191622057185  | 0.192321692013  |
| C  | 4.813130139405  | 4.868077889036  | 0.200718272106  |
| H  | 2.846415518606  | 4.003591382021  | -0.068872651339 |
| C  | 6.188668884546  | 4.610448910422  | 0.358538585301  |
| H  | 7.715480406911  | 3.075171358442  | 0.476986037607  |
| H  | 4.446801010739  | 5.891356445796  | 0.197265179398  |
| H  | 6.888509823803  | 5.433743854690  | 0.477310611019  |
| H  | 2.500639548786  | -2.655628136088 | 1.665765673765  |
| H  | 0.681025025239  | -1.325698748273 | 0.016828515779  |
| H  | 4.125230281976  | -2.360823829441 | 2.237759666765  |
| H  | 6.170994847266  | -1.964666120592 | 0.924168159379  |
| H  | 8.867776516257  | -0.879720157946 | -2.267352476326 |
| Ir | -0.615167885512 | -0.419863060541 | -0.298152149177 |
| I  | -1.708574005534 | -1.063226876393 | 2.448549737077  |
| C  | -6.039604617501 | 1.885687942688  | 0.961041563822  |
| C  | -4.663675042505 | 1.863570211752  | 0.635276132207  |
| C  | -4.213683215993 | 1.130776156805  | -0.480616603990 |

---

|   |                 |                 |                 |
|---|-----------------|-----------------|-----------------|
| C | -5.162741451947 | 0.456460144514  | -1.268606524921 |
| C | -6.536835788237 | 0.466360239400  | -0.983351330451 |
| C | -6.956324324206 | 1.187977883000  | 0.148533604220  |
| H | -6.400640497949 | 2.435300030651  | 1.823054591100  |
| H | -7.237277431521 | -0.068722985639 | -1.615619255424 |
| H | -8.012383470488 | 1.210879211967  | 0.405093419818  |
| O | -3.688842172277 | 2.560165506682  | 1.346616035817  |
| C | -4.065158702093 | 3.240724475744  | 2.587826787639  |
| H | -4.776909369080 | 4.052009578900  | 2.390787052753  |
| H | -4.492930991223 | 2.532002679613  | 3.307035965004  |
| H | -3.134545309327 | 3.652016234891  | 2.981802934042  |
| O | -4.683667736618 | -0.217961422358 | -2.406785239607 |
| C | -3.206823228481 | -0.377405451260 | -2.376104050803 |
| P | -2.468697722028 | 0.896128361398  | -1.136126360018 |
| C | -2.172904454340 | 2.507874978495  | -2.215032566240 |
| C | -1.074163856454 | 2.210122569775  | -3.263778422625 |
| H | -0.839373732150 | 3.138631996995  | -3.803450289691 |
| H | -0.157729603057 | 1.841332733970  | -2.791591524219 |
| H | -1.397593631533 | 1.470762280936  | -4.008170984991 |
| C | -1.678030265421 | 3.610772364499  | -1.245068893421 |
| H | -1.498884820883 | 4.535222280434  | -1.812459905003 |
| H | -2.415907240744 | 3.821088268267  | -0.462718205128 |
| H | -0.738651571718 | 3.318646338243  | -0.759757121545 |
| C | -3.465988345854 | 2.970080336839  | -2.925939439187 |
| H | -3.239329106363 | 3.855567174613  | -3.536797505347 |
| H | -3.870761673490 | 2.199004888643  | -3.592968343157 |
| H | -4.246397221241 | 3.246854083100  | -2.208377769027 |
| C | -2.876417860189 | -1.821699944821 | -2.011113673245 |
| C | -3.690087135842 | -2.828689973722 | -2.556533845459 |
| C | -3.409715934161 | -4.172128012489 | -2.267341179755 |
| H | -4.526919659313 | -2.547601989770 | -3.183347994439 |
| C | -1.534307061079 | -3.416061679511 | -0.934376381531 |
| C | -2.316570431549 | -4.473436693839 | -1.448555675877 |
| H | -4.024649690135 | -4.969024879529 | -2.674299473415 |
| N | -1.804056792407 | -2.097922968966 | -1.192019054726 |
| O | -0.436996726430 | -3.643431352932 | -0.140148797141 |
| C | -0.131719978424 | -5.015284757002 | 0.282869684962  |
| H | 0.123946212269  | -5.645998515239 | -0.577115461510 |
| H | -0.971552195635 | -5.451170907135 | 0.836750538301  |
| H | 0.733072952534  | -4.916721780155 | 0.939792754574  |
| H | -2.074131179828 | -5.502182252831 | -1.216191403266 |
| H | -2.861388255155 | -0.163755183401 | -3.392092555539 |
| H | 0.096635729469  | -0.137323357150 | -1.690179483728 |
| H | 0.247950692787  | 0.796667712692  | 0.303196531742  |

**G**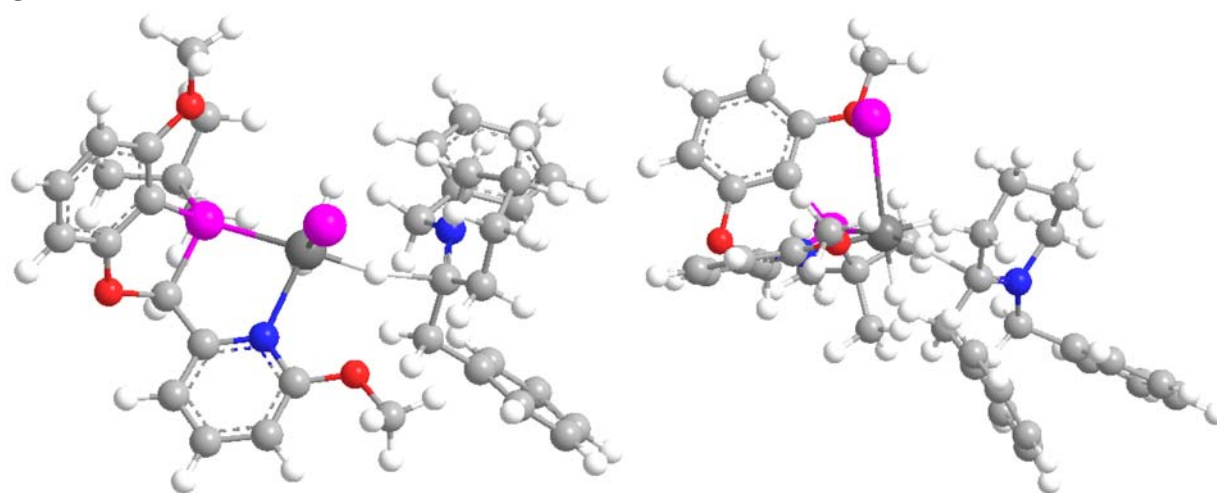

SCF Done: E(RB3LYP) = -1895.77530466 A.U.

Temperature 298.150 Kelvin. Pressure 1.00000 Atm.

Zero-point correction= 0.767175 (Hartree/Particle)  
 Thermal correction to Energy= 0.813280  
 Thermal correction to Enthalpy= 0.814224  
 Thermal correction to Gibbs Free Energy= 0.681268  
 Sum of electronic and zero-point Energies= -1895.008130  
 Sum of electronic and thermal Energies= -1894.962024  
 Sum of electronic and thermal Enthalpies= -1894.961080  
 Sum of electronic and thermal Free Energies= -1895.094036

| Atomic Type | Coordinates (Angstroms) |                 |                 |
|-------------|-------------------------|-----------------|-----------------|
|             | X                       | Y               | Z               |
| C           | 6.695291170209          | -1.296468022787 | -1.995956137918 |
| C           | 5.366039597649          | -0.901189338000 | -1.750278990612 |
| C           | 4.502056181049          | -1.703642947253 | -0.970782805205 |
| C           | 5.000611079161          | -2.923331884018 | -0.456242113794 |
| C           | 6.329322694745          | -3.321183030115 | -0.696614626392 |
| C           | 7.184502959318          | -2.506127672833 | -1.465189927292 |
| H           | 7.341522510988          | -0.666311315519 | -2.601974690412 |
| H           | 5.002411188819          | 0.026535958584  | -2.185846059702 |
| H           | 6.691756210340          | -4.264183159863 | -0.294740598105 |
| C           | 2.860669355721          | -1.482831589486 | 1.836429275612  |
| C           | 2.524556849555          | -0.812706502311 | 3.177631173646  |
| C           | 2.814079065386          | -0.570012831109 | 0.612710744691  |
| C           | 3.261165346768          | 0.532368191418  | 3.284687647846  |
| H           | 1.441898805860          | -0.653047647879 | 3.245353289241  |

---

|    |                 |                 |                 |
|----|-----------------|-----------------|-----------------|
| C  | 2.893337823624  | 1.413984869253  | 2.087476684644  |
| H  | 4.348406420532  | 0.375074253439  | 3.314298831132  |
| H  | 3.485864398383  | 2.331640609022  | 2.080890887967  |
| C  | 3.044895115816  | -1.294288064698 | -0.727911965051 |
| H  | 2.674054526897  | -0.694196854892 | -1.560080608726 |
| H  | 2.411703412207  | -2.183464908200 | -0.689023681865 |
| H  | 1.827699179169  | 1.688290846782  | 2.124858304120  |
| H  | 2.979603201376  | 1.060983128960  | 4.203591313180  |
| H  | 2.810721327488  | -1.482062474668 | 3.998184701503  |
| N  | 3.108990646670  | 0.735048156583  | 0.770015747082  |
| C  | 3.150872803820  | 1.698331467093  | -0.362653527630 |
| H  | 2.192717251540  | 2.234953778891  | -0.367557601547 |
| H  | 3.205031261824  | 1.145787911304  | -1.299880515415 |
| C  | 4.309336327367  | 2.686420641303  | -0.282768322436 |
| C  | 5.610312770328  | 2.274367249873  | 0.081578736224  |
| C  | 4.091551991627  | 4.036045153095  | -0.631962791442 |
| C  | 6.672335382602  | 3.197212111723  | 0.098404131552  |
| H  | 5.791072772310  | 1.238955836135  | 0.359264165331  |
| C  | 5.154958050786  | 4.959913314575  | -0.624308071007 |
| H  | 3.091983992578  | 4.367396259671  | -0.906448742935 |
| C  | 6.449668799995  | 4.543186205179  | -0.257482439396 |
| H  | 7.668084088632  | 2.868830493233  | 0.386137636916  |
| H  | 4.972484630539  | 5.996742171230  | -0.895596638928 |
| H  | 7.270702304879  | 5.255670961462  | -0.245042176419 |
| H  | 2.194948572324  | -2.326261059776 | 1.645190452675  |
| H  | 1.053828163559  | -0.618185139916 | 0.448154915285  |
| H  | 3.886835070402  | -1.882202177770 | 1.872721025756  |
| H  | 4.345506656110  | -3.574196460080 | 0.118503179028  |
| H  | 8.209861347355  | -2.813245448861 | -1.655277335339 |
| Ir | -0.456847272675 | -0.030895608163 | 0.032532459607  |
| I  | -1.681596090181 | -1.139037155774 | 2.525324627126  |
| C  | -6.194064090892 | 1.294445139921  | 0.896579536327  |
| C  | -4.810963212820 | 1.502674774237  | 0.690655384236  |
| C  | -4.168992868810 | 0.917459877810  | -0.418155325992 |
| C  | -4.935154474110 | 0.160471103618  | -1.320928888954 |
| C  | -6.311392303122 | -0.056596612737 | -1.154931882895 |
| C  | -6.923786044698 | 0.518456340995  | -0.026985026509 |
| H  | -6.702769566909 | 1.726635275702  | 1.750794873445  |
| H  | -6.869169589208 | -0.648693573666 | -1.872425768129 |
| H  | -7.986928301160 | 0.363955187988  | 0.138297880344  |
| O  | -4.013386956372 | 2.292894179505  | 1.513510126383  |
| C  | -4.592052147971 | 2.859399029893  | 2.734909787003  |
| H  | -5.400941554603 | 3.560615200540  | 2.495602023036  |
| H  | -4.964104663960 | 2.066446519562  | 3.394525849349  |

---

|   |                 |                 |                 |
|---|-----------------|-----------------|-----------------|
| H | -3.771494127352 | 3.390376571562  | 3.219611646012  |
| O | -4.269924179892 | -0.354201237107 | -2.449408822832 |
| C | -2.793774489252 | -0.278372685405 | -2.310922391551 |
| P | -2.371133474568 | 0.994670743124  | -0.935375349595 |
| C | -2.214214324039 | 2.714855737277  | -1.859819517352 |
| C | -1.033478530682 | 2.648064892080  | -2.858518269478 |
| H | -0.900105195614 | 3.641436536119  | -3.309229786696 |
| H | -0.099790139130 | 2.365584610760  | -2.361897038431 |
| H | -1.216850549809 | 1.939338858730  | -3.676456852135 |
| C | -1.922162690484 | 3.786930725871  | -0.779498821970 |
| H | -1.830981858919 | 4.768432393461  | -1.265804239256 |
| H | -2.725660955789 | 3.841147201777  | -0.036618725079 |
| H | -0.983228681426 | 3.574445148995  | -0.254249938120 |
| C | -3.518957490721 | 3.060117651349  | -2.615871963168 |
| H | -3.379858403779 | 4.014847165167  | -3.142117401315 |
| H | -3.776631783486 | 2.301062727168  | -3.365003347347 |
| H | -4.368367375988 | 3.172055852157  | -1.933194788211 |
| C | -2.255133139843 | -1.672544071952 | -2.005799406926 |
| C | -2.850524147518 | -2.752739386691 | -2.676986912326 |
| C | -2.381162066458 | -4.052644268578 | -2.439100049941 |
| H | -3.670956051543 | -2.562988825025 | -3.357380661561 |
| C | -0.764733174749 | -3.105997666122 | -0.905269064976 |
| C | -1.323294244231 | -4.235288956460 | -1.543430144459 |
| H | -2.824733474457 | -4.905615046292 | -2.943285206788 |
| N | -1.219373083567 | -1.833656374405 | -1.113043758138 |
| O | 0.291866918717  | -3.217671379069 | -0.030946091152 |
| C | 0.697351066906  | -4.559386662840 | 0.414551189810  |
| H | 1.125762854195  | -5.136159886655 | -0.413374664946 |
| H | -0.150914776178 | -5.094455005361 | 0.855599485604  |
| H | 1.458133470738  | -4.386882129146 | 1.175758640278  |
| H | -0.937398241268 | -5.227234753510 | -1.349571013933 |
| H | -2.418646261672 | 0.062582797715  | -3.280324722866 |
| H | 0.331062808672  | 0.526439388462  | -1.227548051919 |
| H | 0.023462314370  | 1.280631754640  | 0.808567430524  |

## References:

- 1) Gaussian 09, Revision C.01, M. J. Frisch, G. W. Trucks, H. B. Schlegel, G. E. Scuseria, M. A. Robb, J. R. Cheeseman, G. Scalmani, V. Barone, B. Mennucci, G. A. Petersson, H. Nakatsuji, M. Caricato, X. Li, H. P. Hratchian, A. F. Izmaylov, J. Bloino, G. Zheng, J. L. Sonnenberg, M. Hada, M. Ehara, K. Toyota, R. Fukuda, J. Hasegawa, M. Ishida, T. Nakajima, Y. Honda, O. Kitao, H. Nakai, T. Vreven, J. A. Montgomery, Jr., J. E. Peralta, F. Ogliaro, M. Bearpark, J. J. Heyd, E. Brothers, K. N. Kudin, V. N. Staroverov, T. Keith, R. Kobayashi, J. Normand, K. Raghavachari, A. Rendell, J. C. Burant, S. S. Iyengar, J. Tomasi, M. Cossi, N. Rega, J. M. Millam, M. Klene, J. E. Knox, J. B. Cross, V. Bakken, C. Adamo, J. Jaramillo, R. Gomperts, R. E. Stratmann, O. Yazyev, A. J. Austin, R. Cammi, C. Pomelli, J. W. Ochterski,

- R. L. Martin, K. Morokuma, V. G. Zakrzewski, G. A. Voth, P. Salvador, J. J. Dannenberg, S. Dapprich, A. D. Daniels, O. Farkas, J. B. Foresman, J. V. Ortiz, J. Cioslowski, and D. J. Fox, Gaussian, Inc., Wallingford CT, 2010.
- 2) a) Becke, A. D. *J. Chem. Phys.* **1993**, *98*, 5648. b) Lee, C.; Yang, W.; Parr, R. G. *Phys. Rev. B.* **1988**, *37*, 785.
  - 3) a) Hay, P. J.; Wadt, W. R. *J. Chem. Phys.* **1985**, *82*, 270-283. b) Wadt, W. R.; Hay, P. J. *J. Chem. Phys.* **1985**, *82*, 299-310.
  - 4) Dunning, T. H. Jr.; Hay, P. J. in *Modern Theoretical Chemistry*, Ed. H. F. Schaefer III, Vol. 3 (Plenum, New York, 1977) 1-28.
  - 5) a) Martín, M.; Sola, E.; Tejero, S.; Andrés, J. L.; Oro, L. A. *Chem. Eur. J.* **2006**, *12*, 4043-4056. b) Martín, M.; Sola, E.; Tejero, S.; Andrés, J. L.; Oro, L. A. *Chem. Eur. J.* **2006**, *12*, 4057-4068.
  - 6) Hopmann K. H.; Bayer, A. *Organometallics* **2011**, *30*, 2483-2497.
